# Supplementary material for: Metal-free site-selective C–N bond-forming reaction of polyhalogenated pyridines and pyrimidines
Source: Royal Society of Chemistry journal article supplement (doi:10.1039/c5ra18653f), 2015-01-01

*Supporting information for*

**Metal-free site-selective C–N bond-forming reaction of  
polyhalogenated pyridines and pyrimidines**

Lei Wang, Ning Liu,\* Bin Dai,\*

*School of Chemistry and Chemical Engineering, the Key Laboratory for Green Processing of  
Chemical Engineering of Xinjiang Bingtuan, Shihezi University, North 4th Road, Shihezi, Xinjiang  
832003, China*

Fax.: +86-0993-205-7157; phone: +86-0993-205-7277; e-mail: ninglau@163.com (N. Liu);  
dbinly@126.com (B. Dai)

**Contents**

NMR Spectra for Products

S2-S102

# NMR Spectra for all Cross-Coupling Products

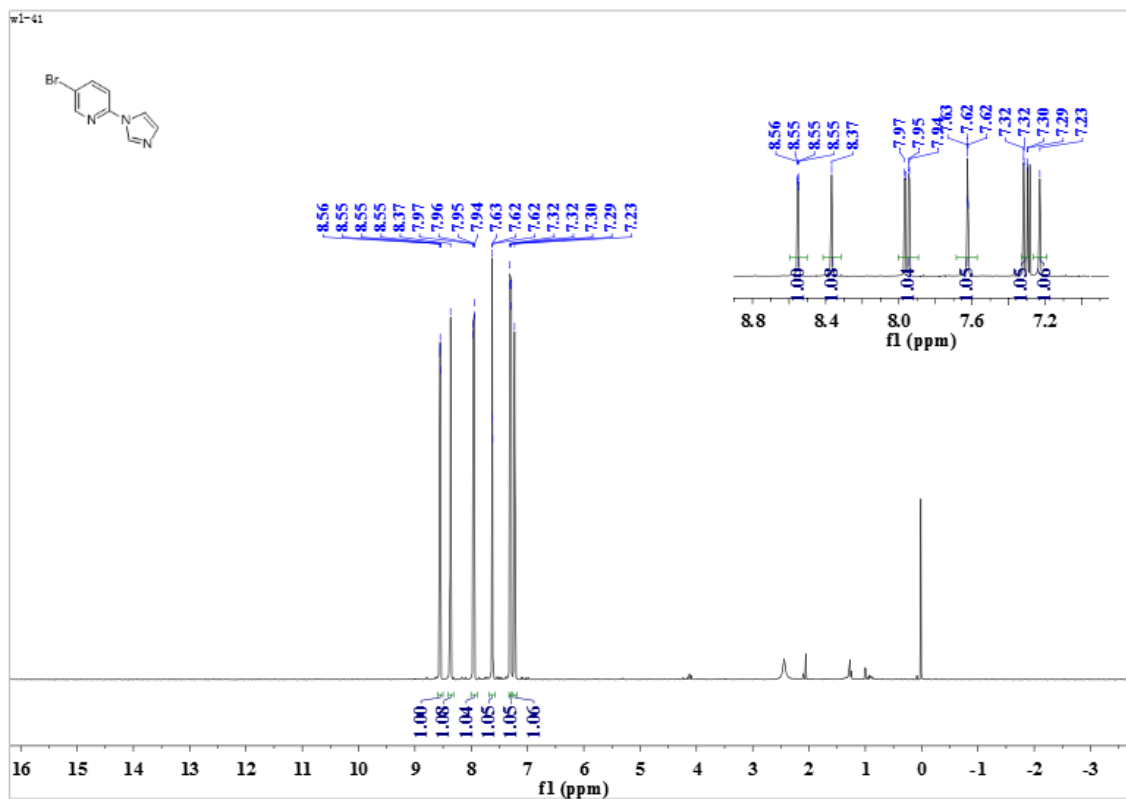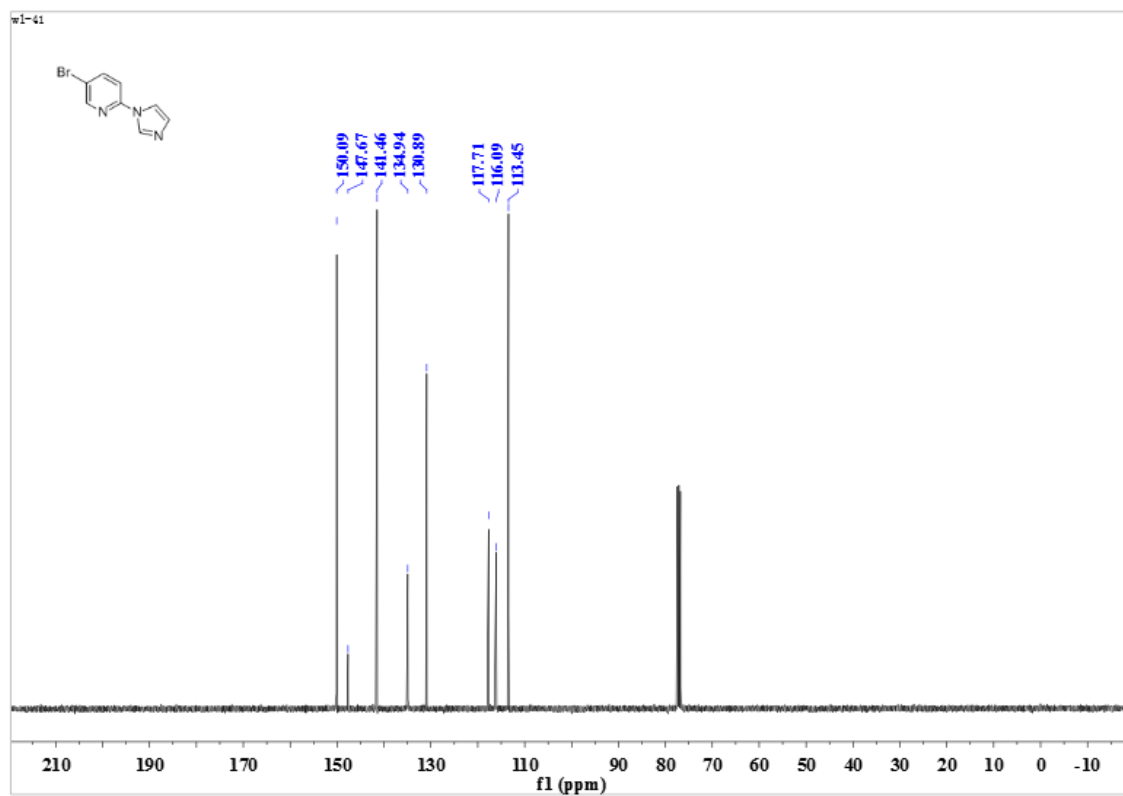

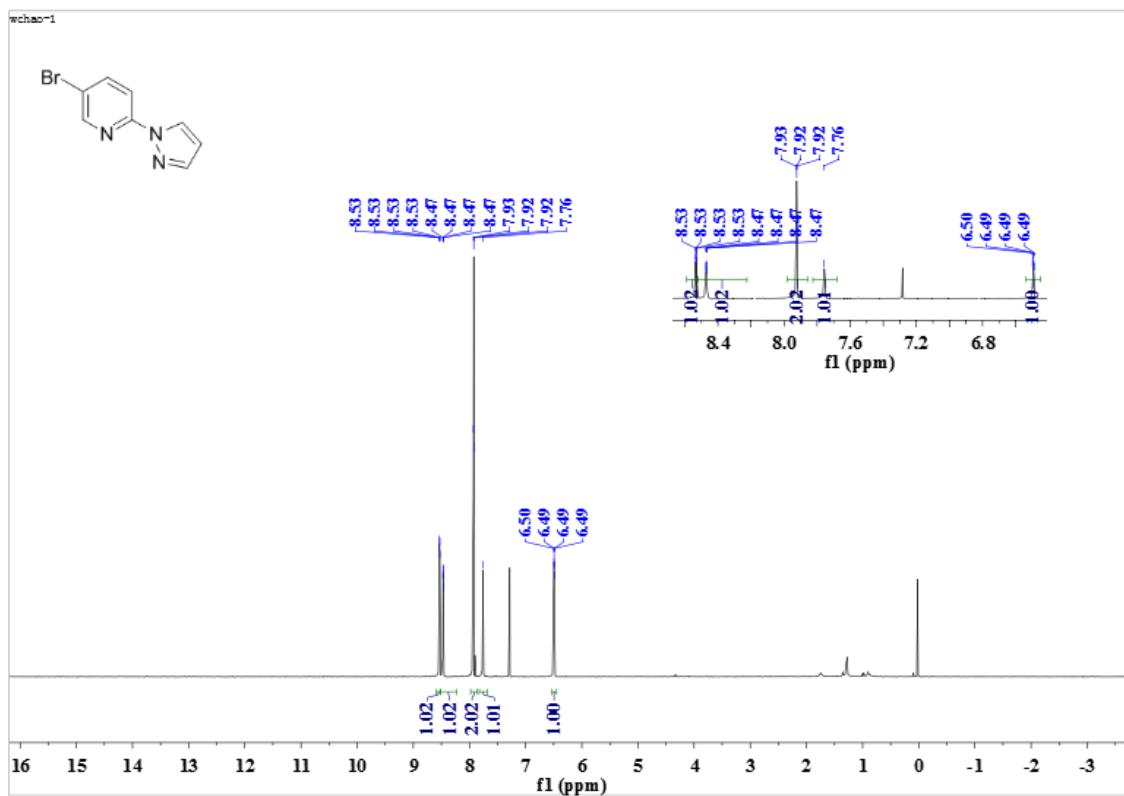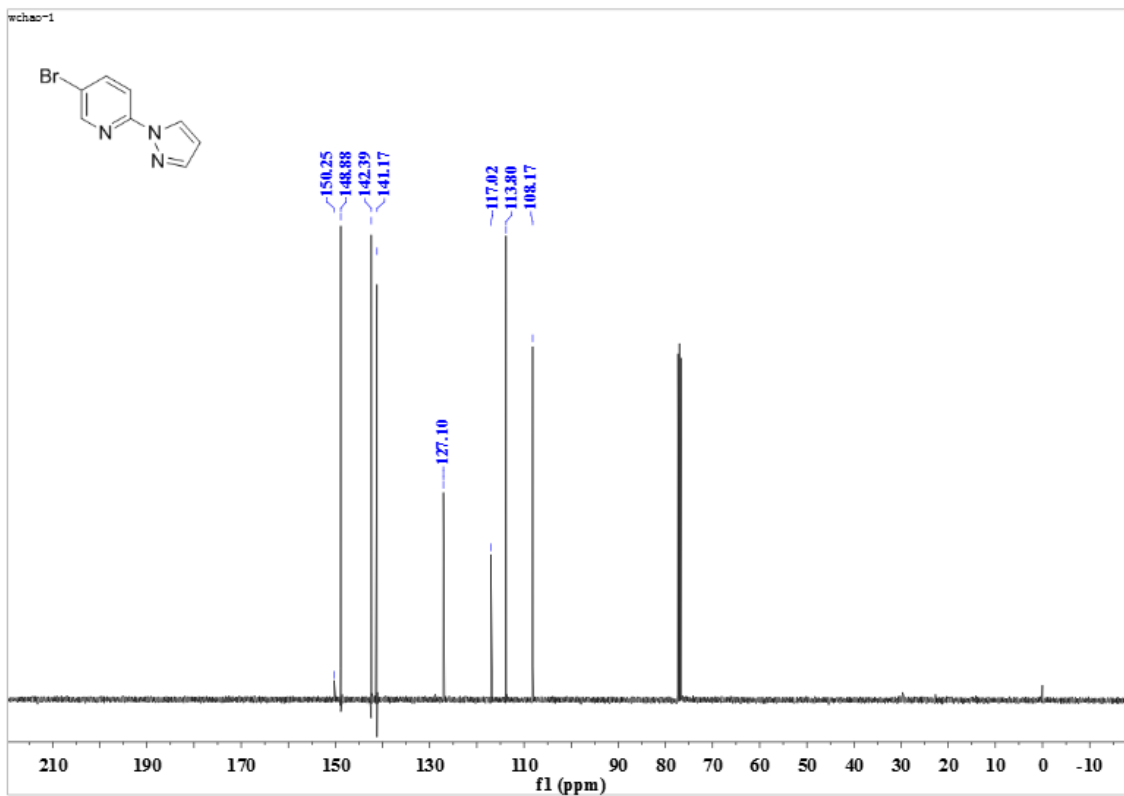

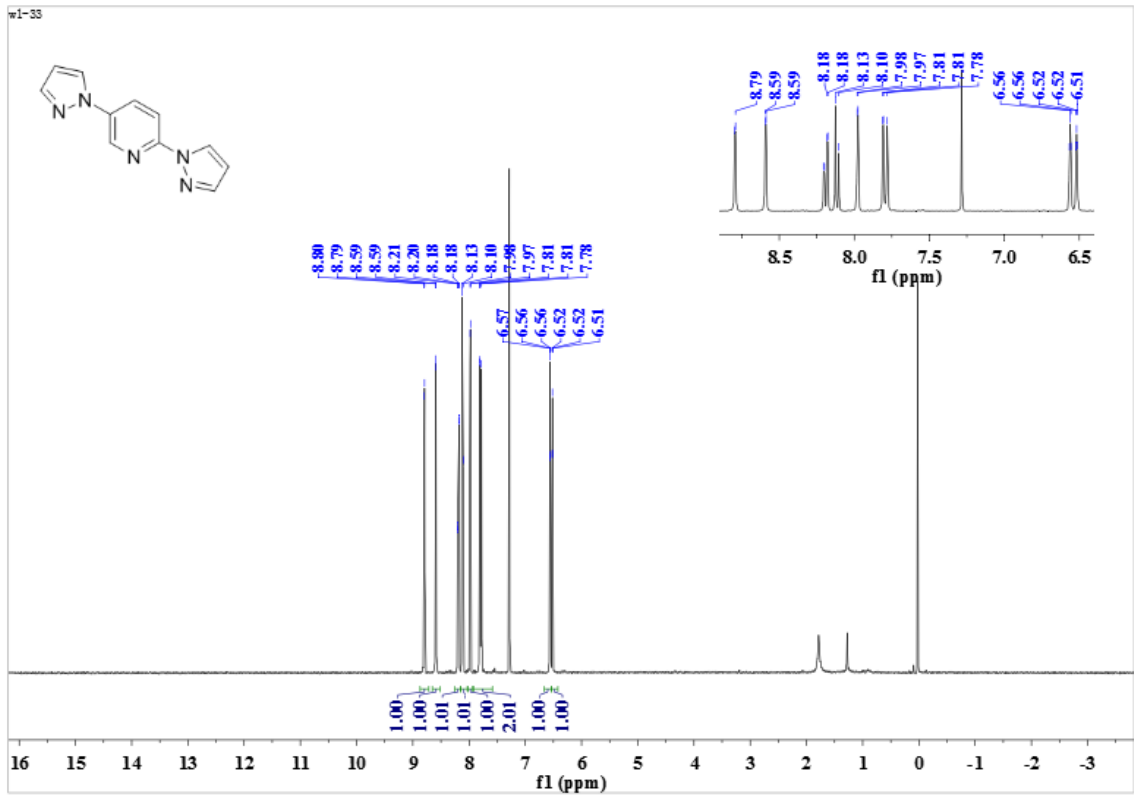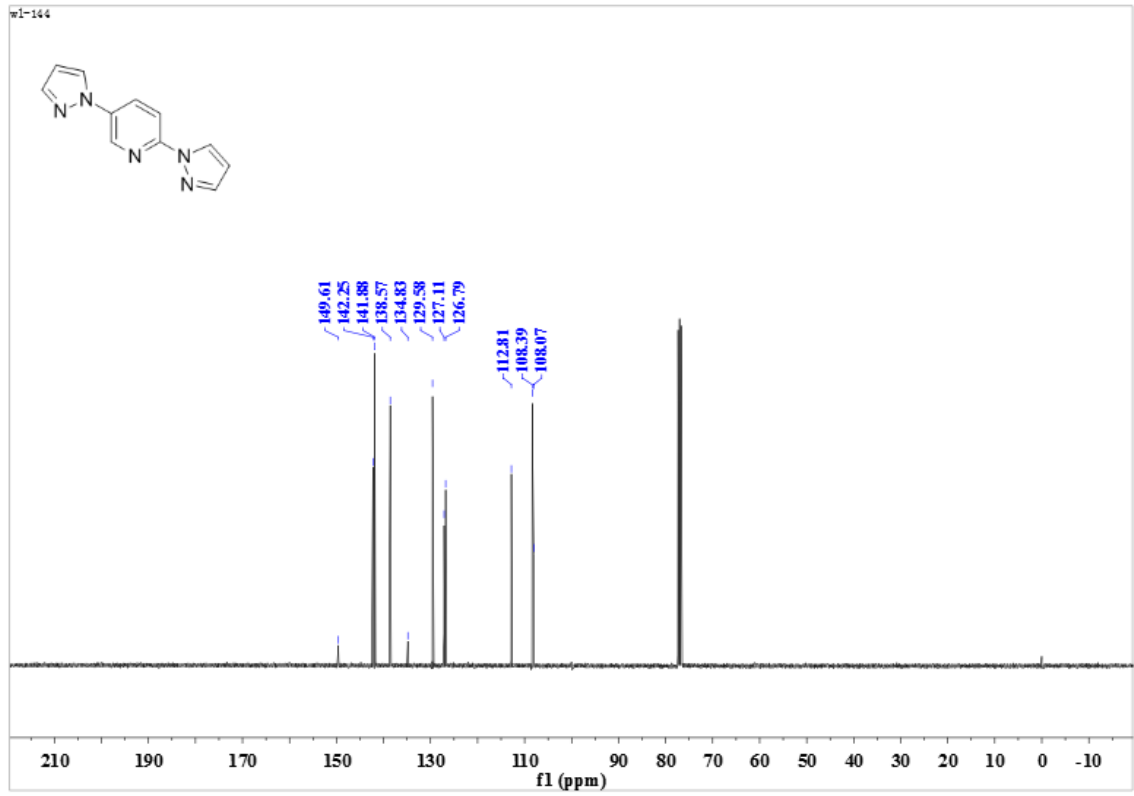

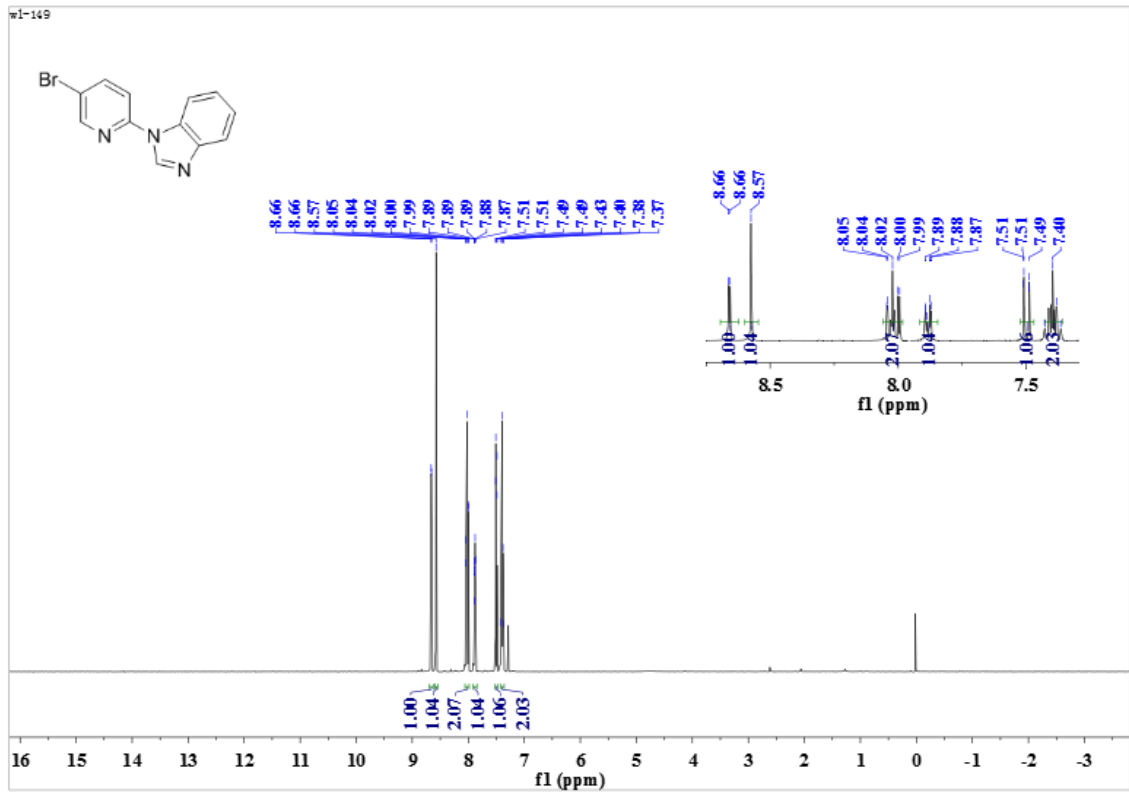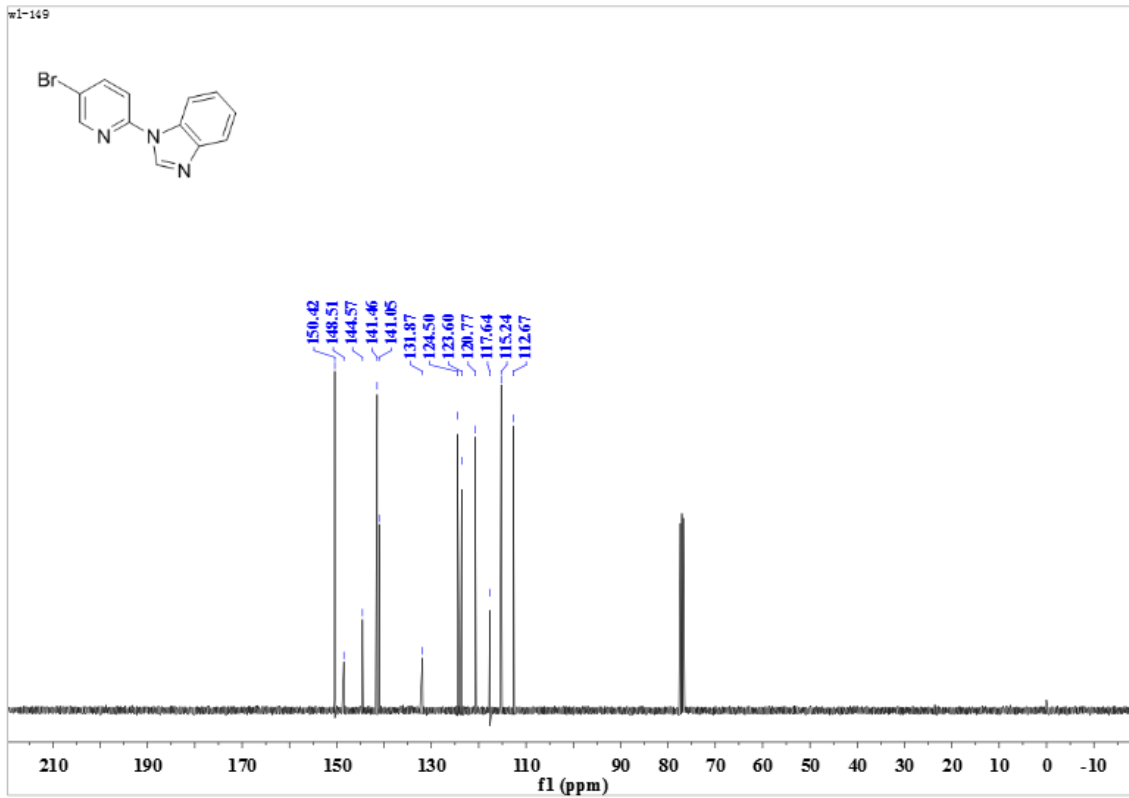

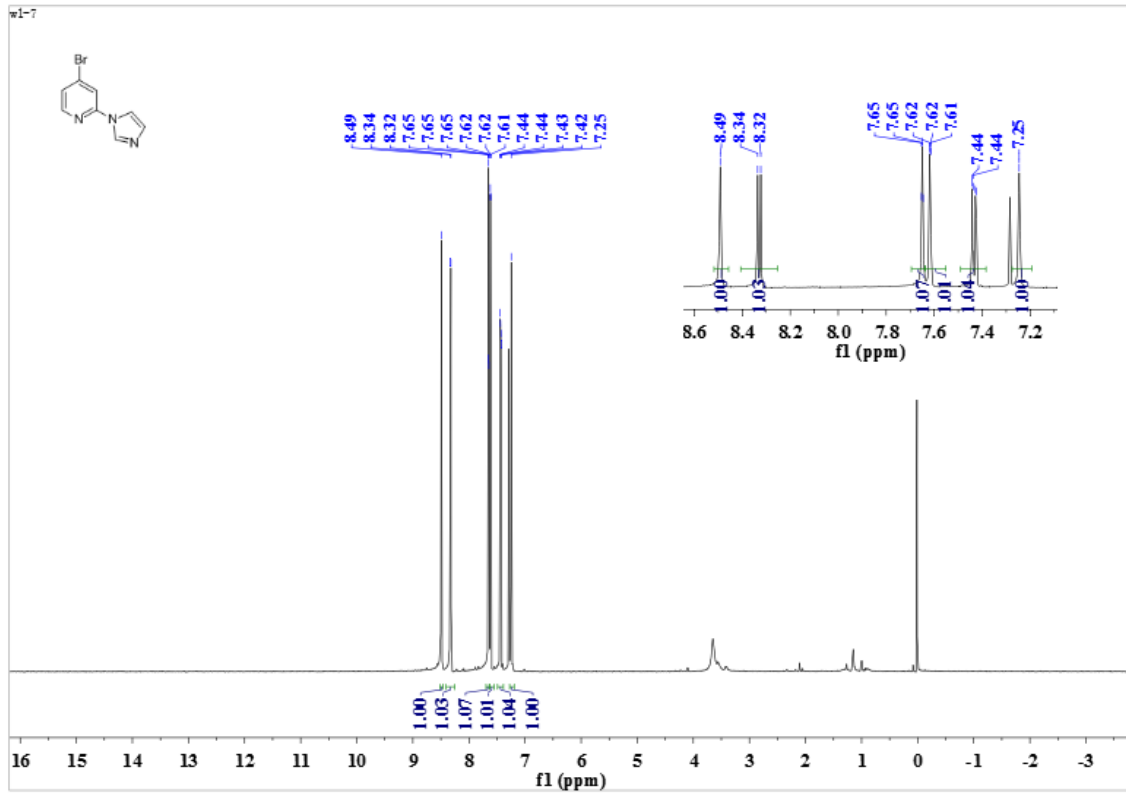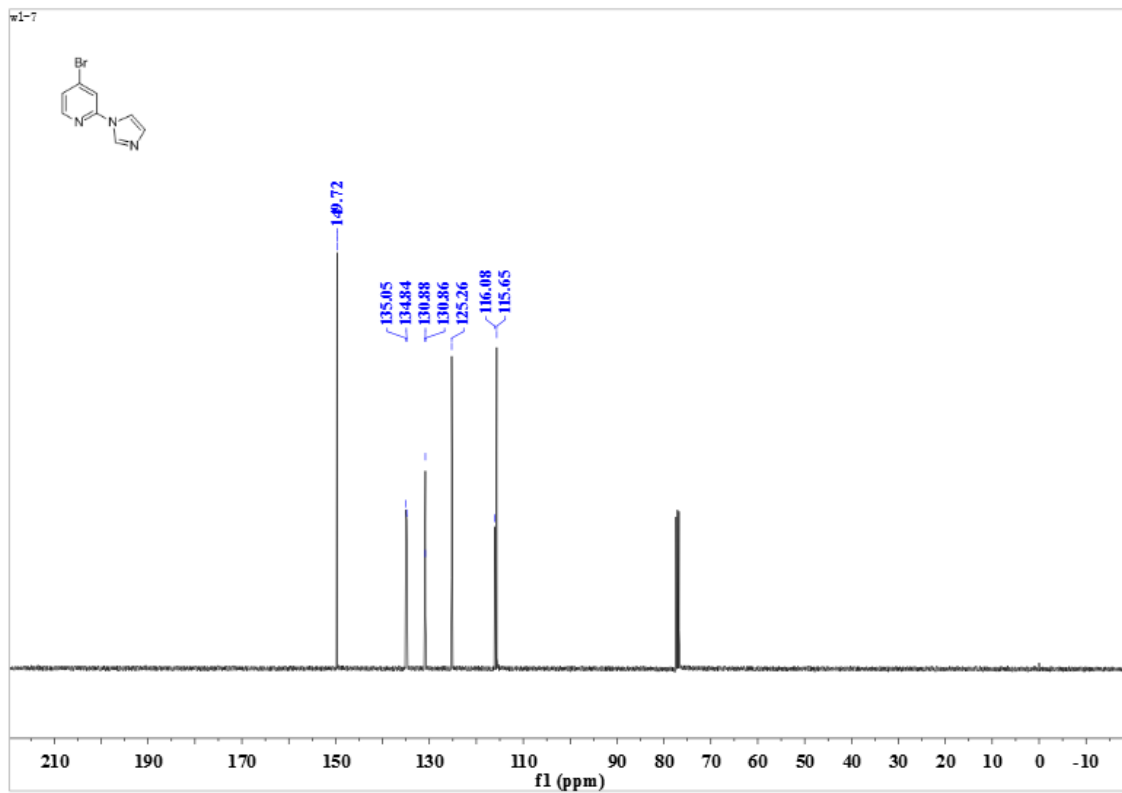

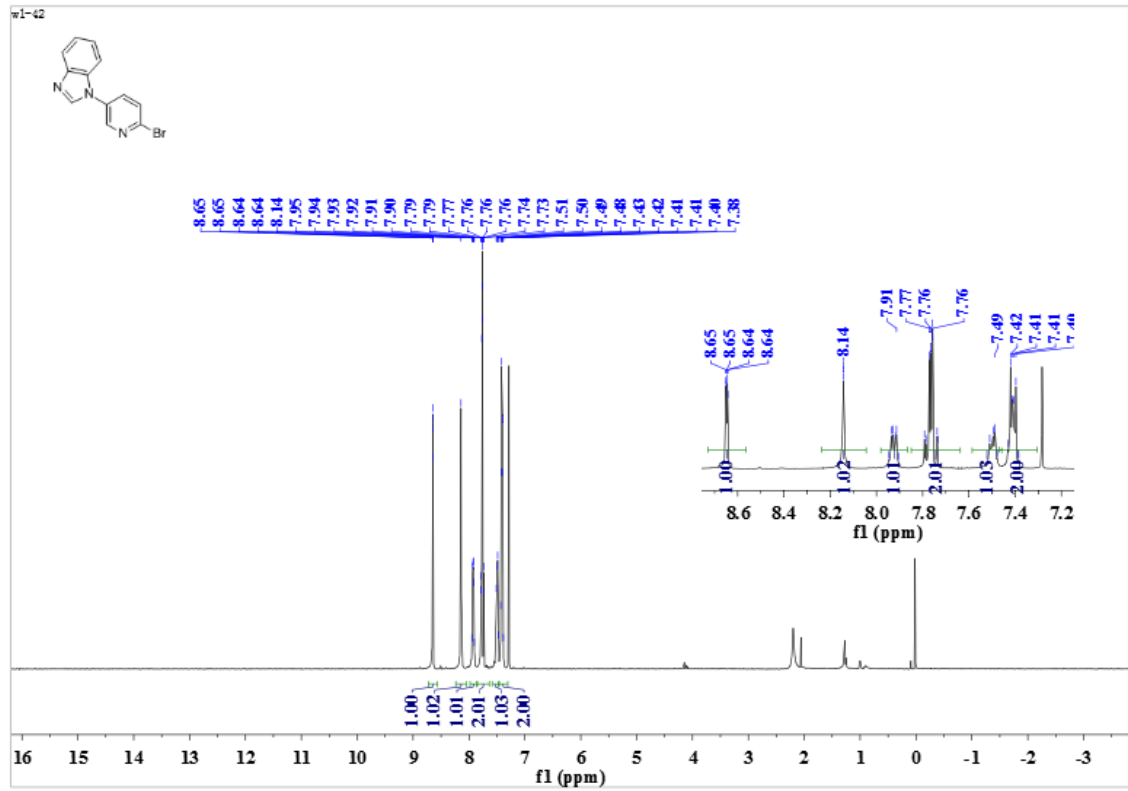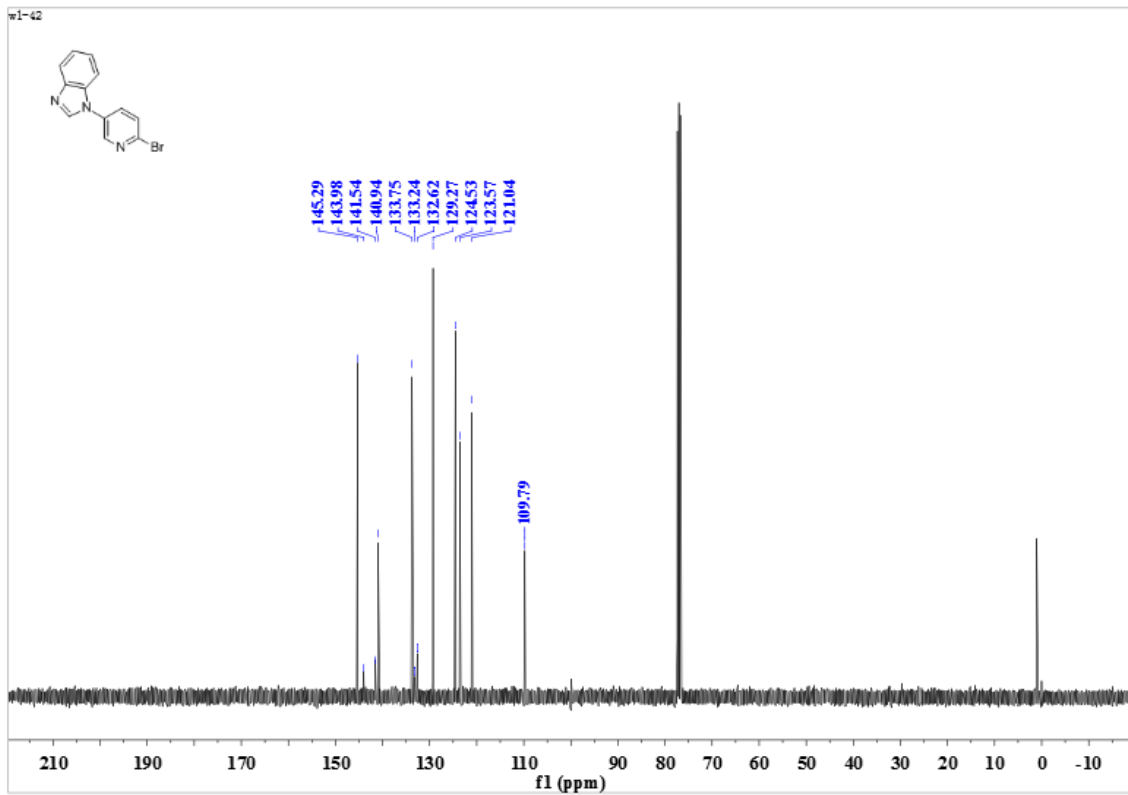





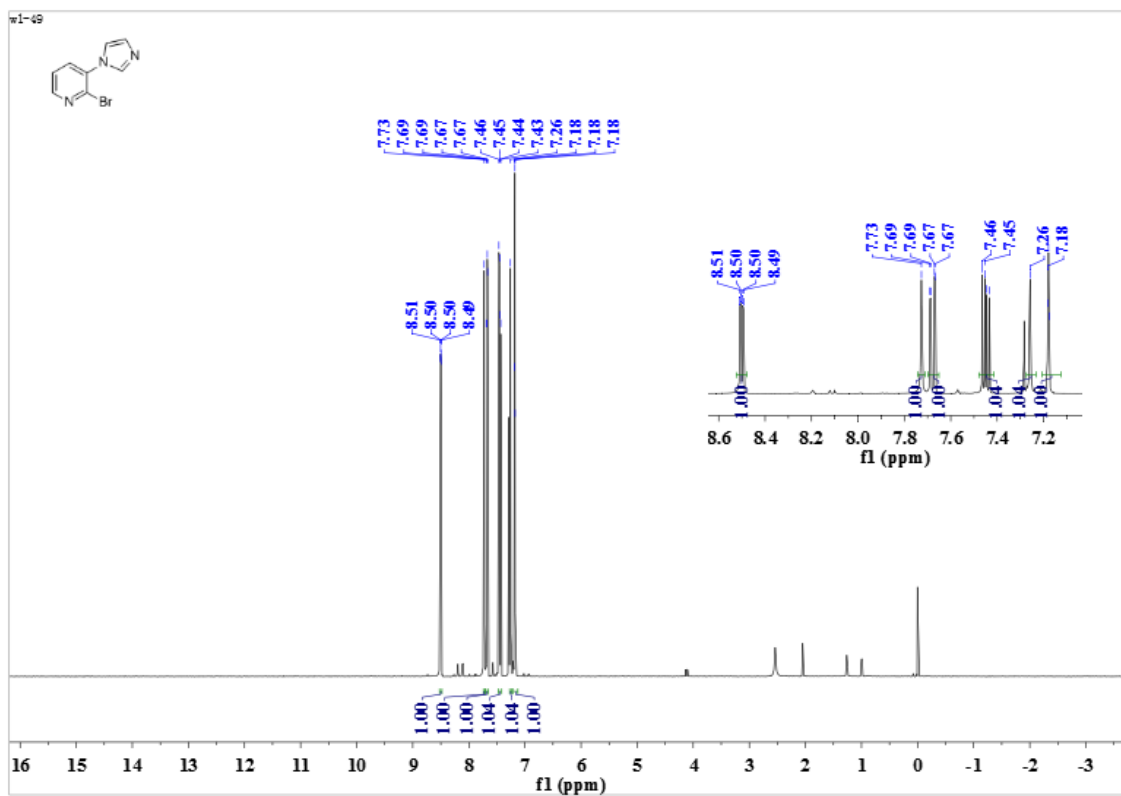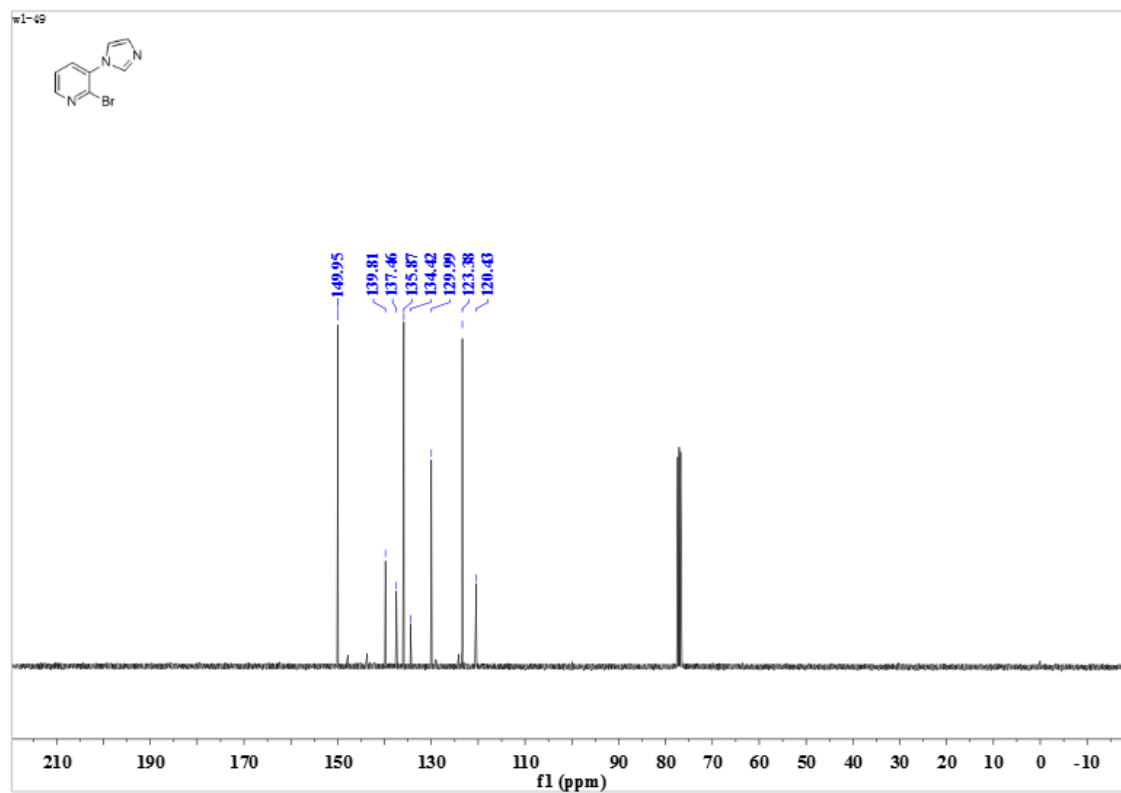

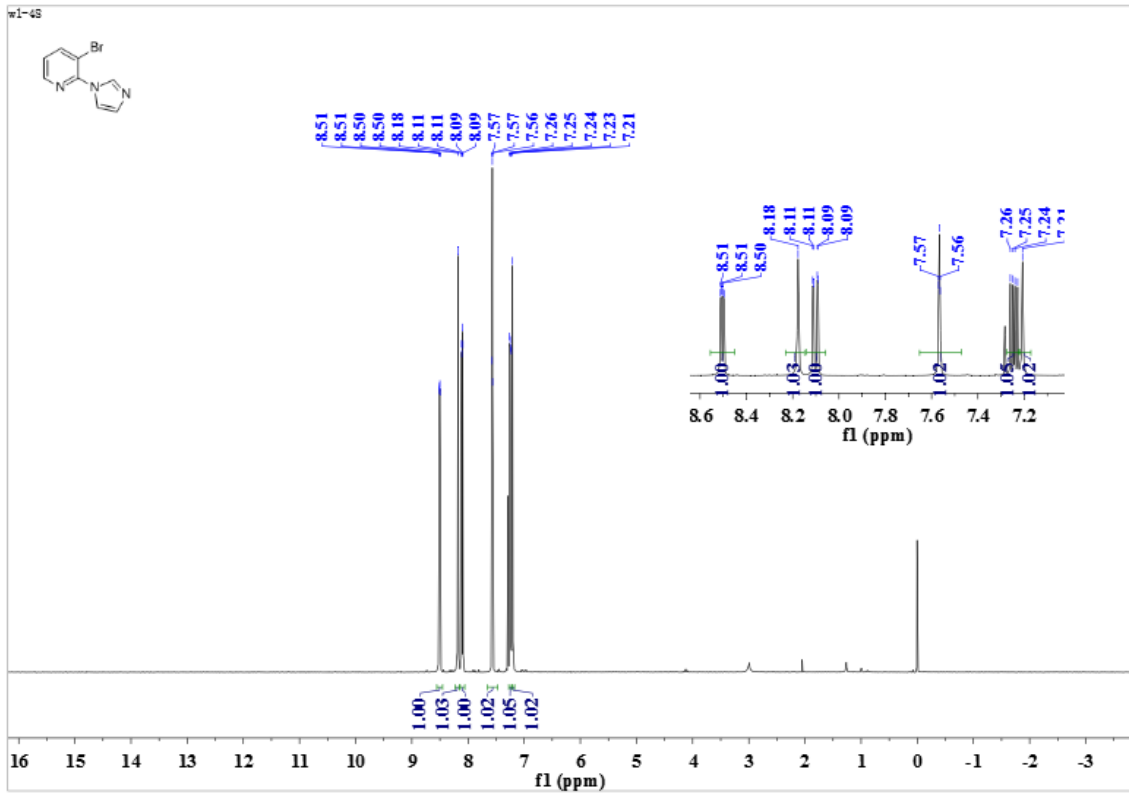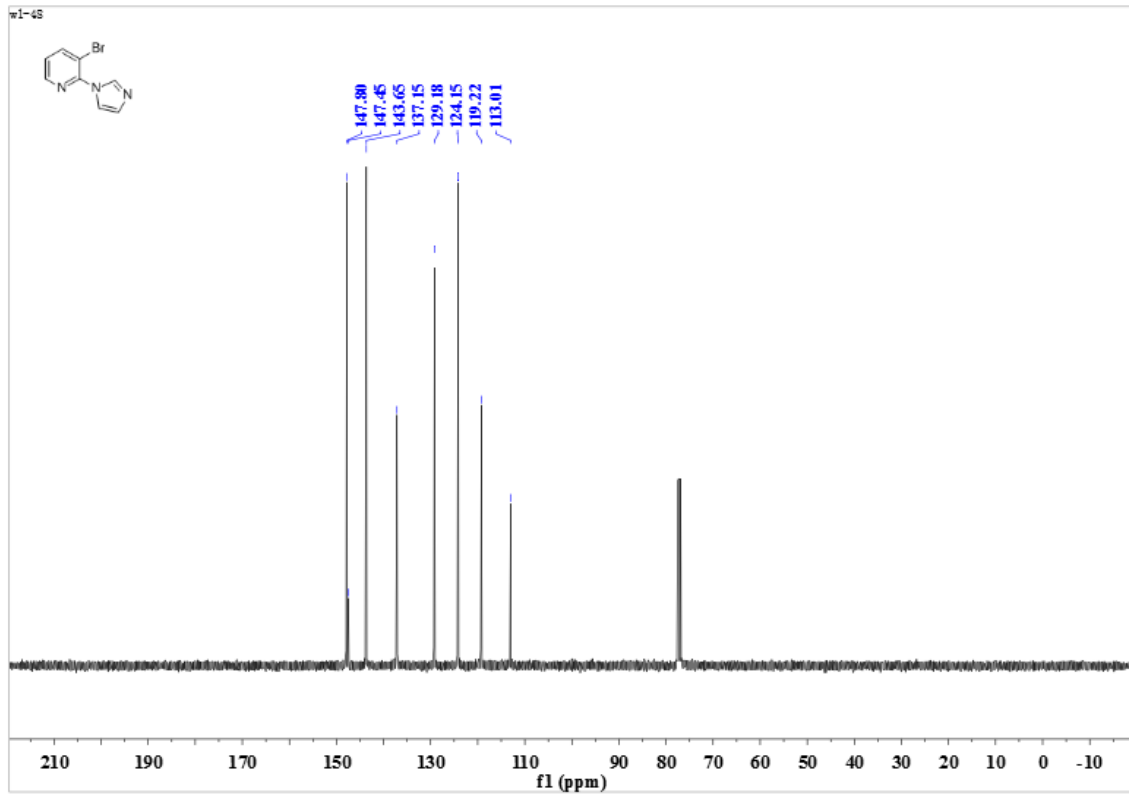

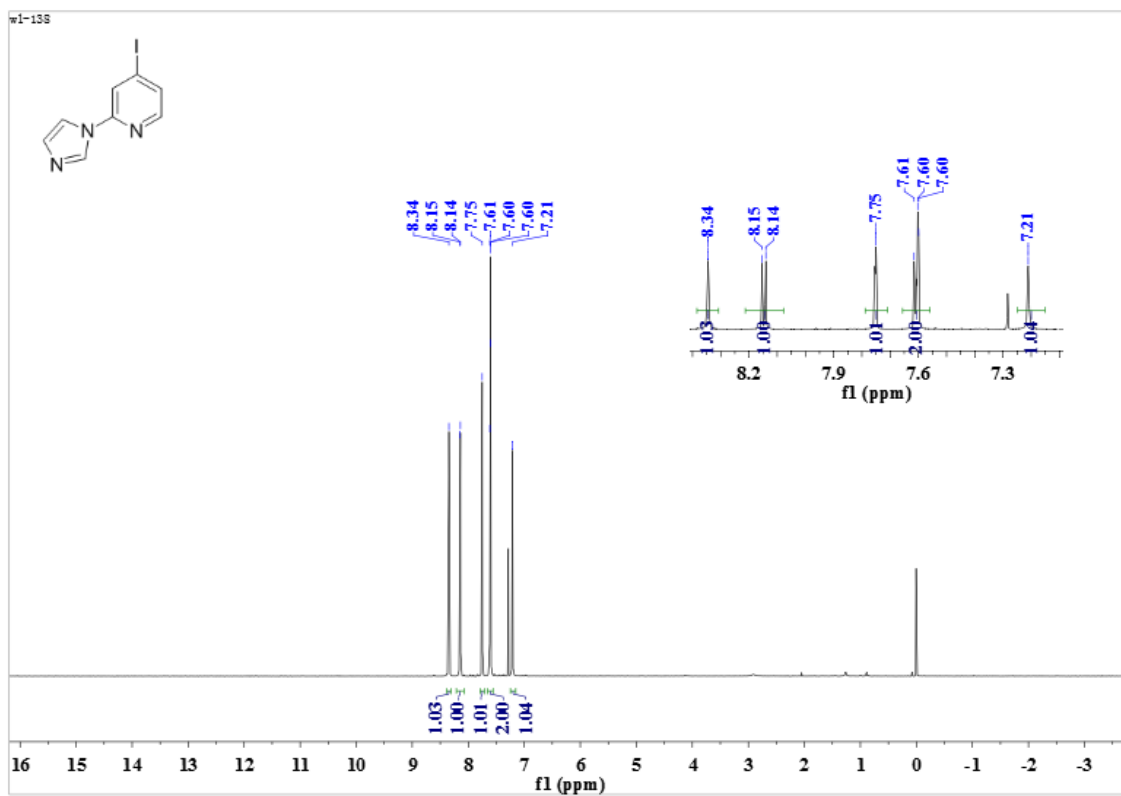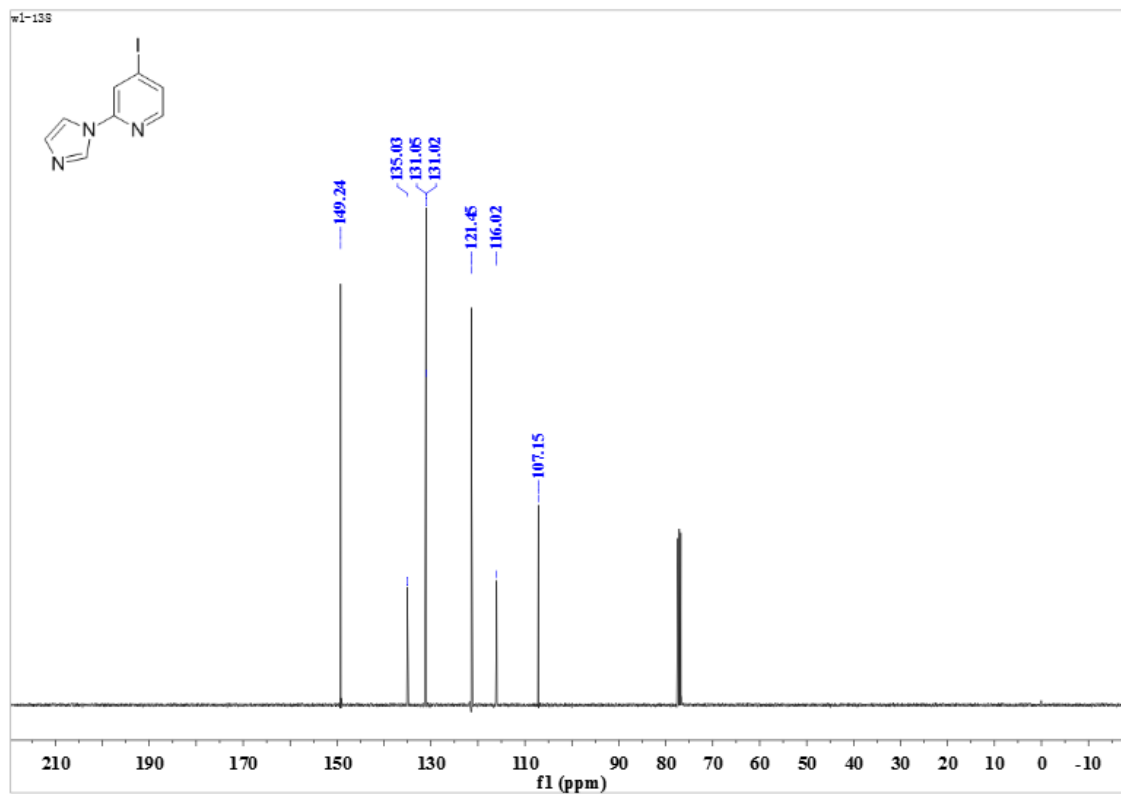

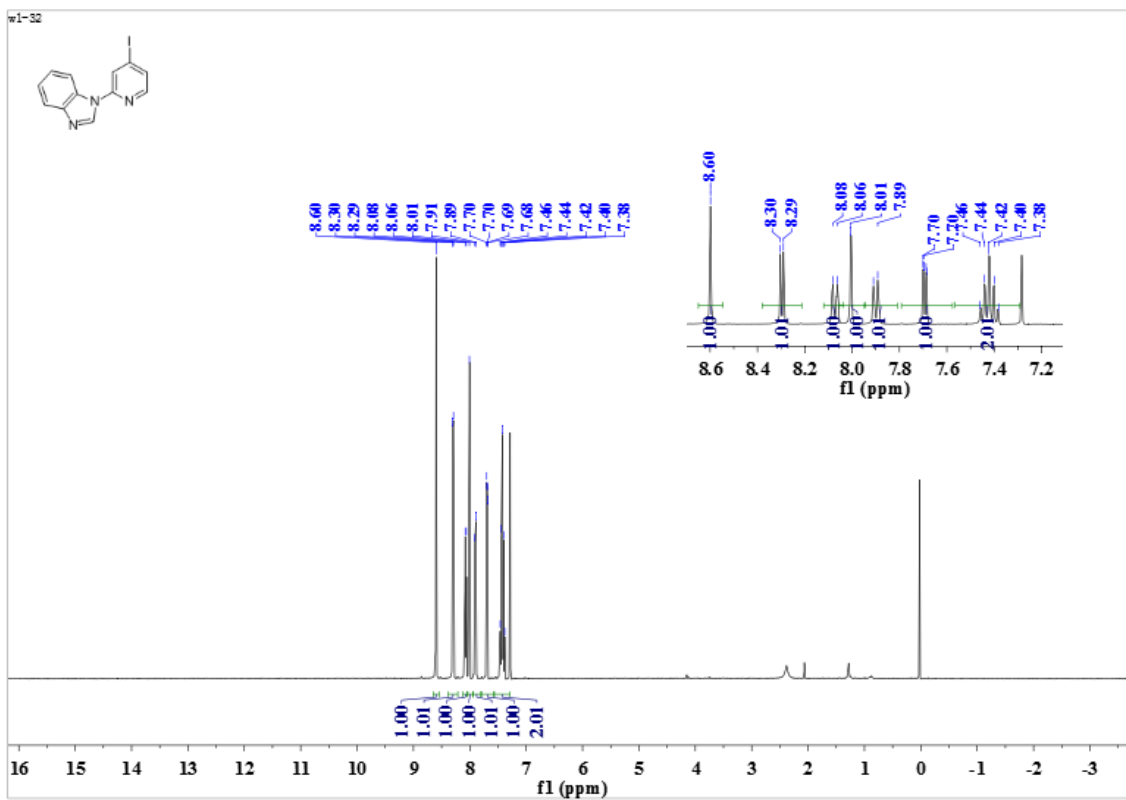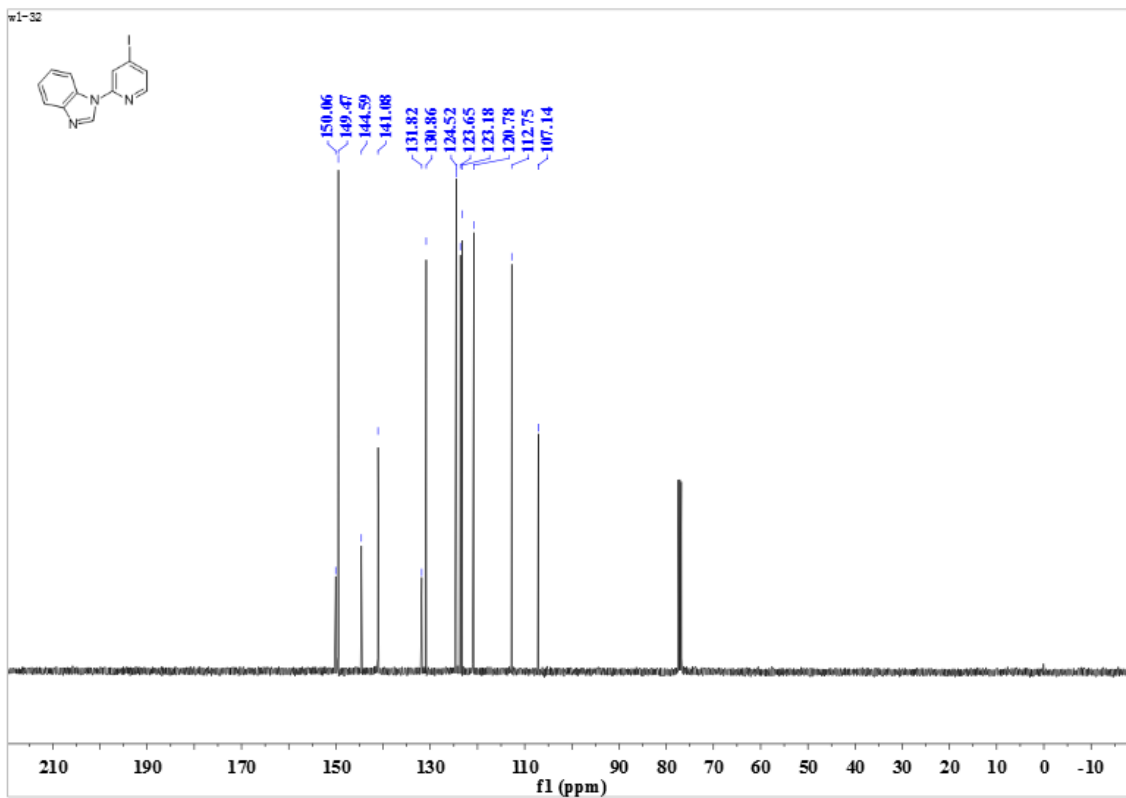

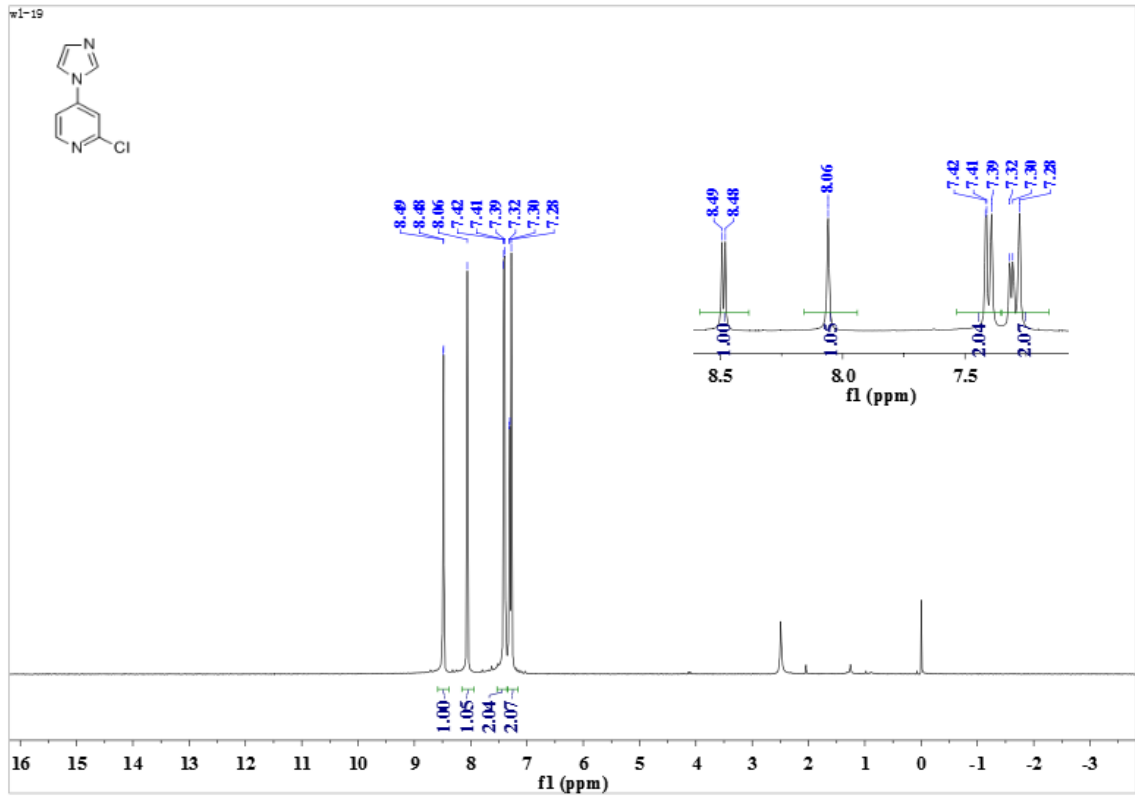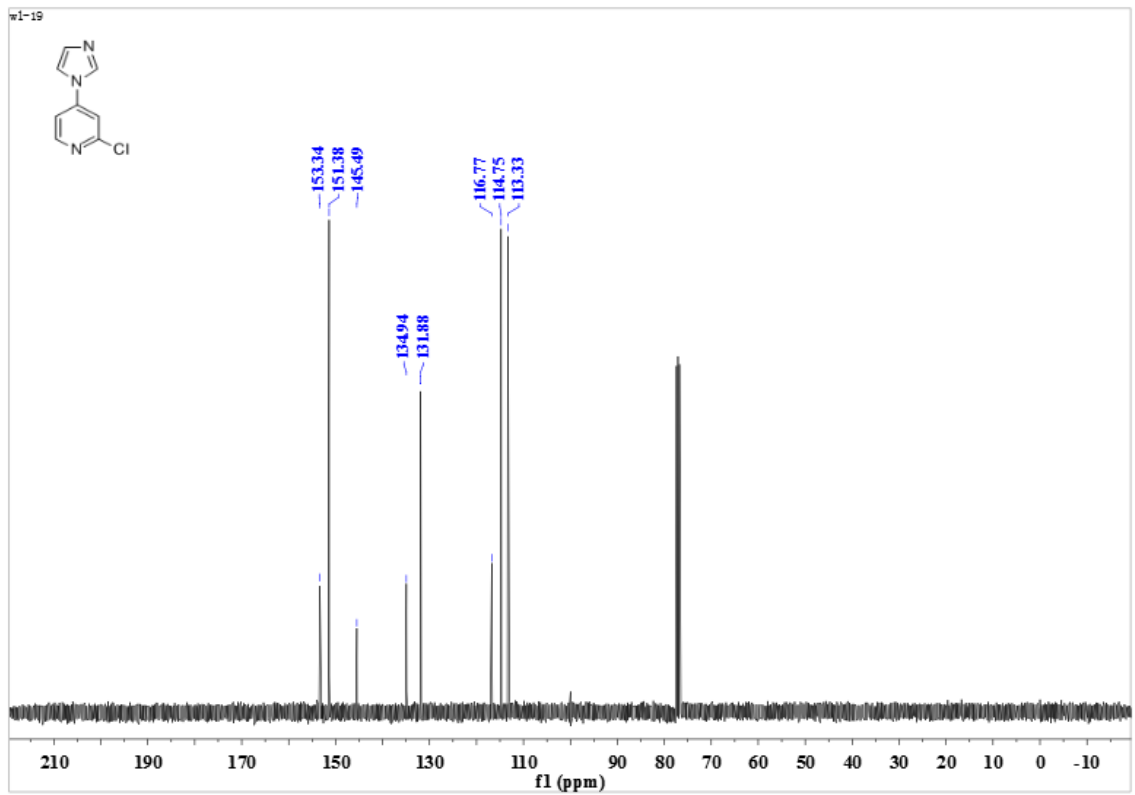

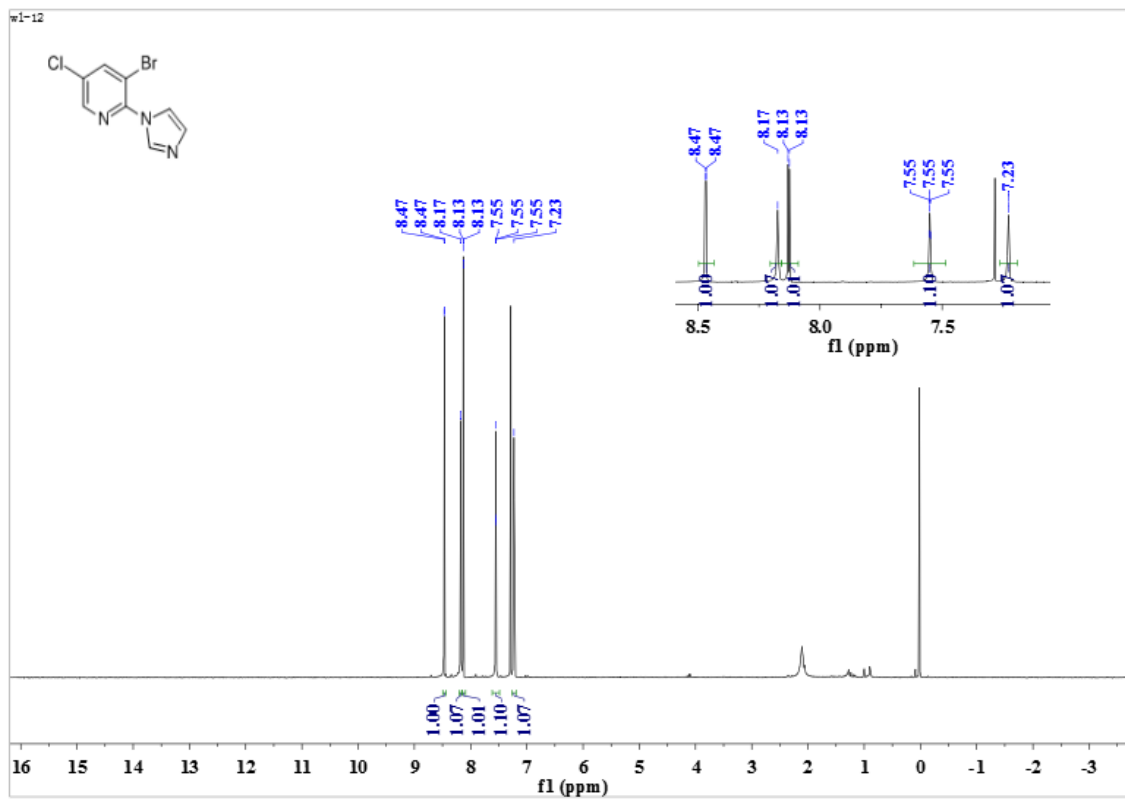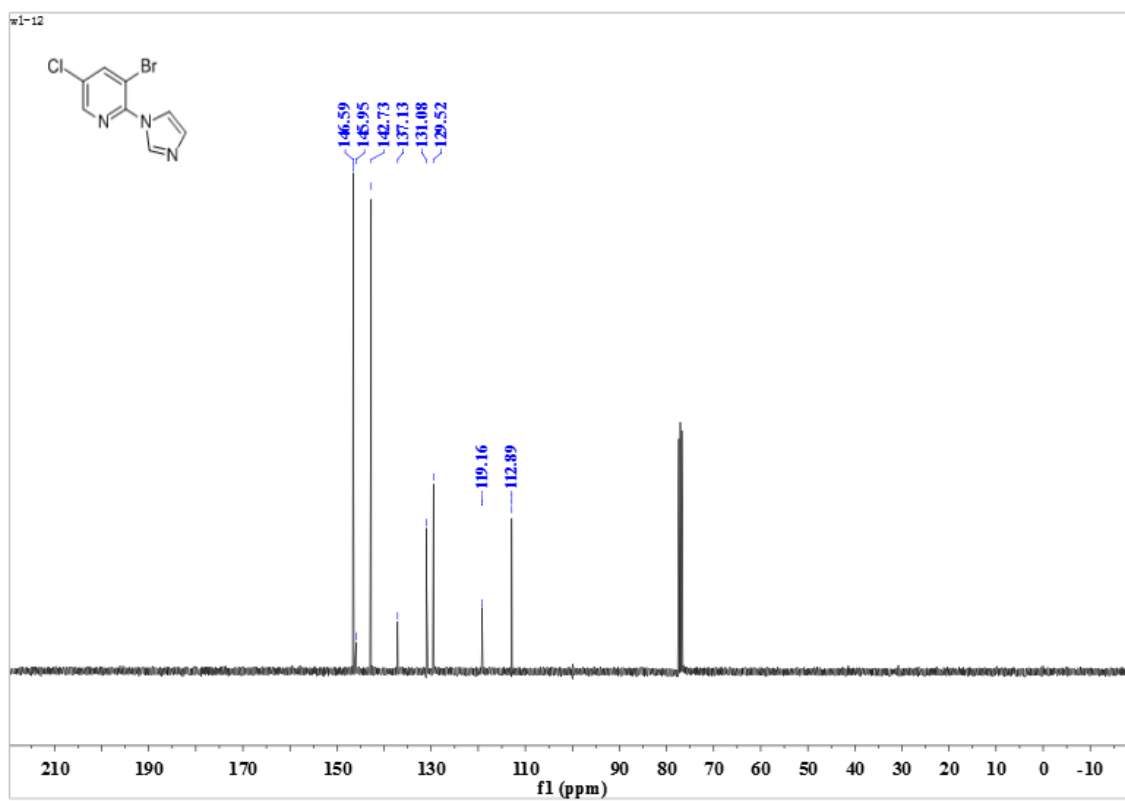

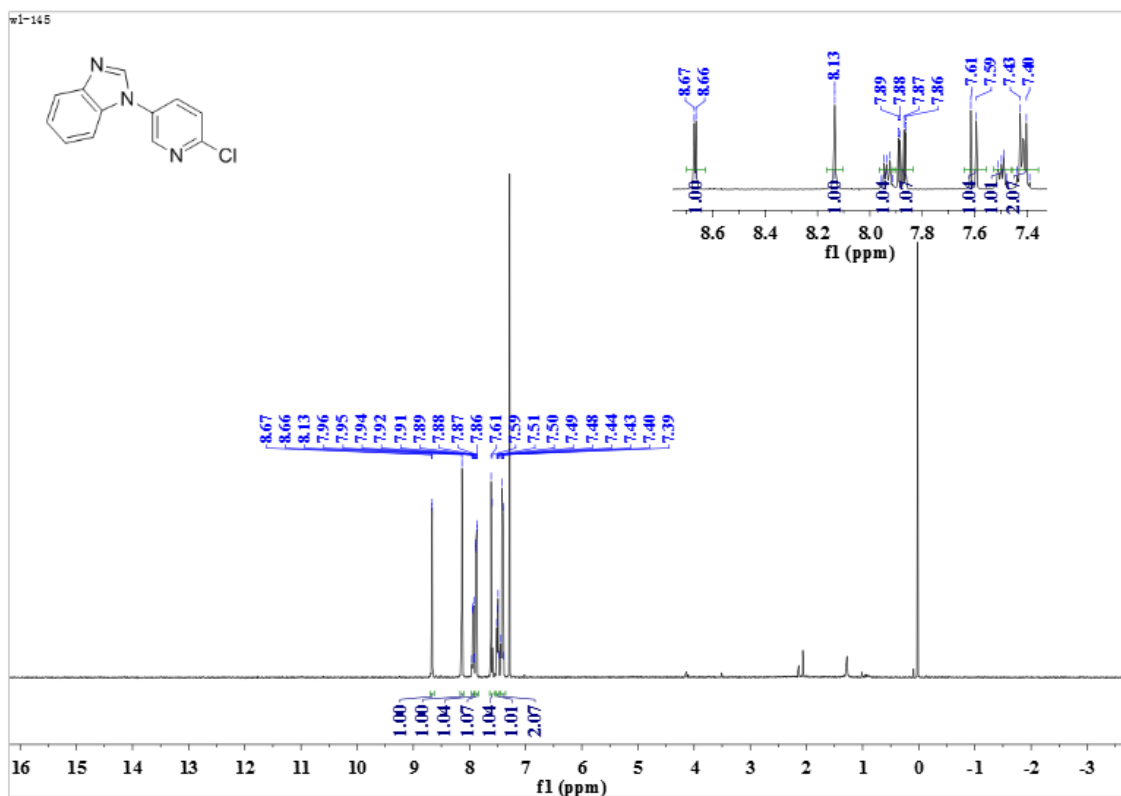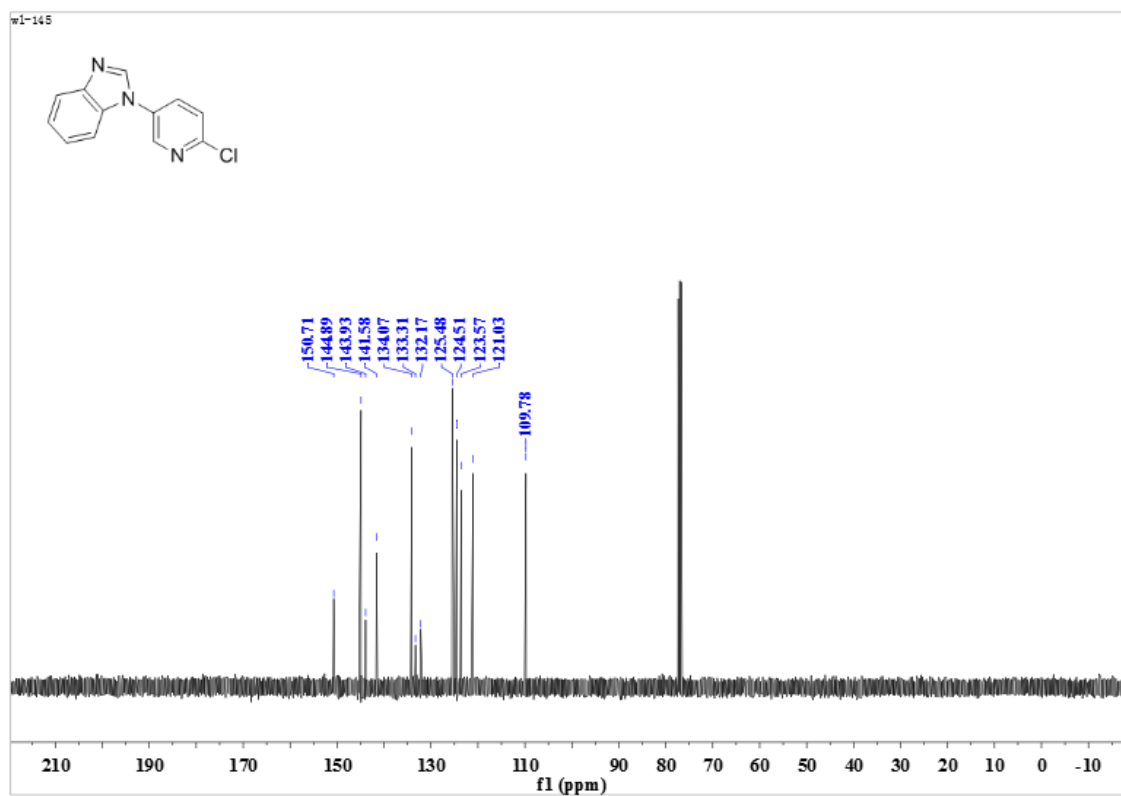

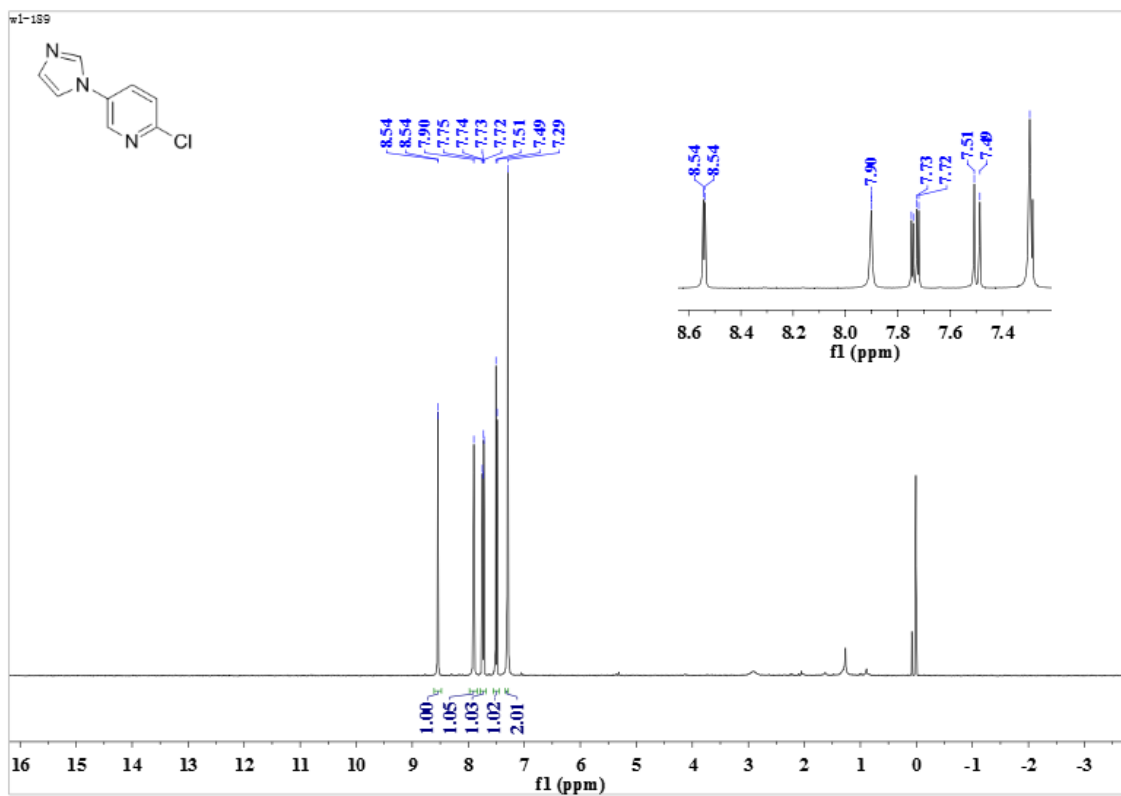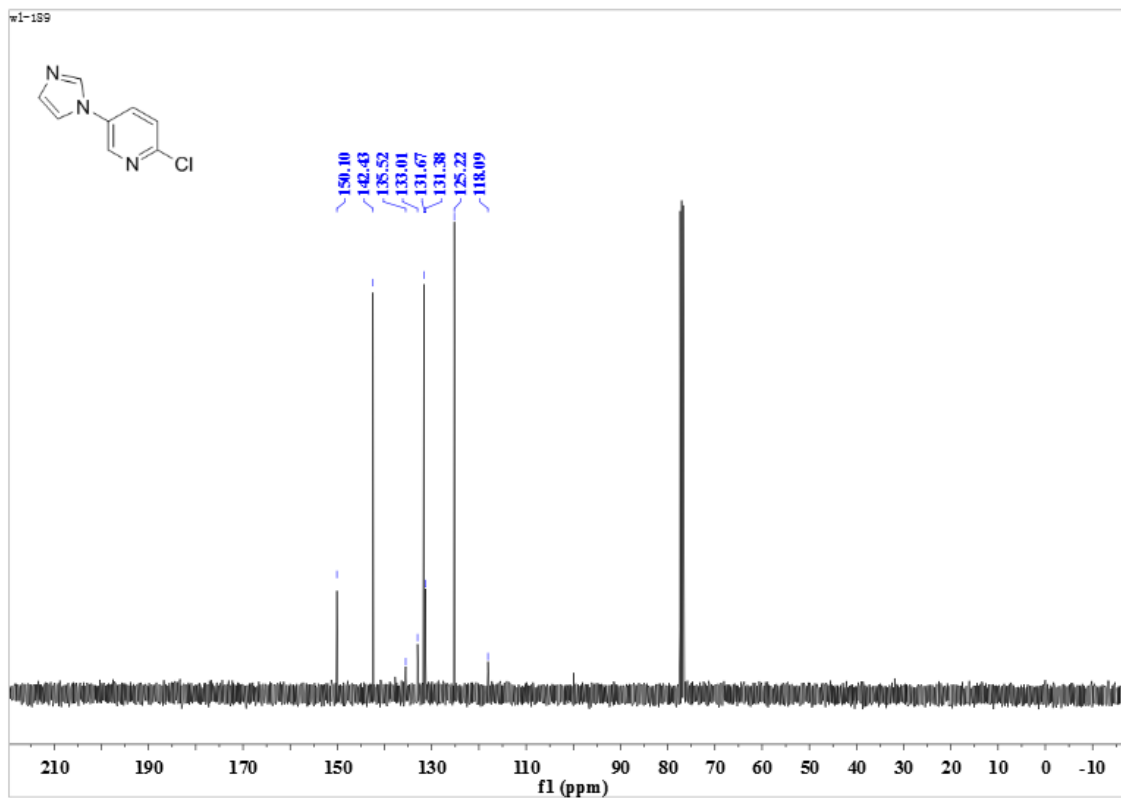



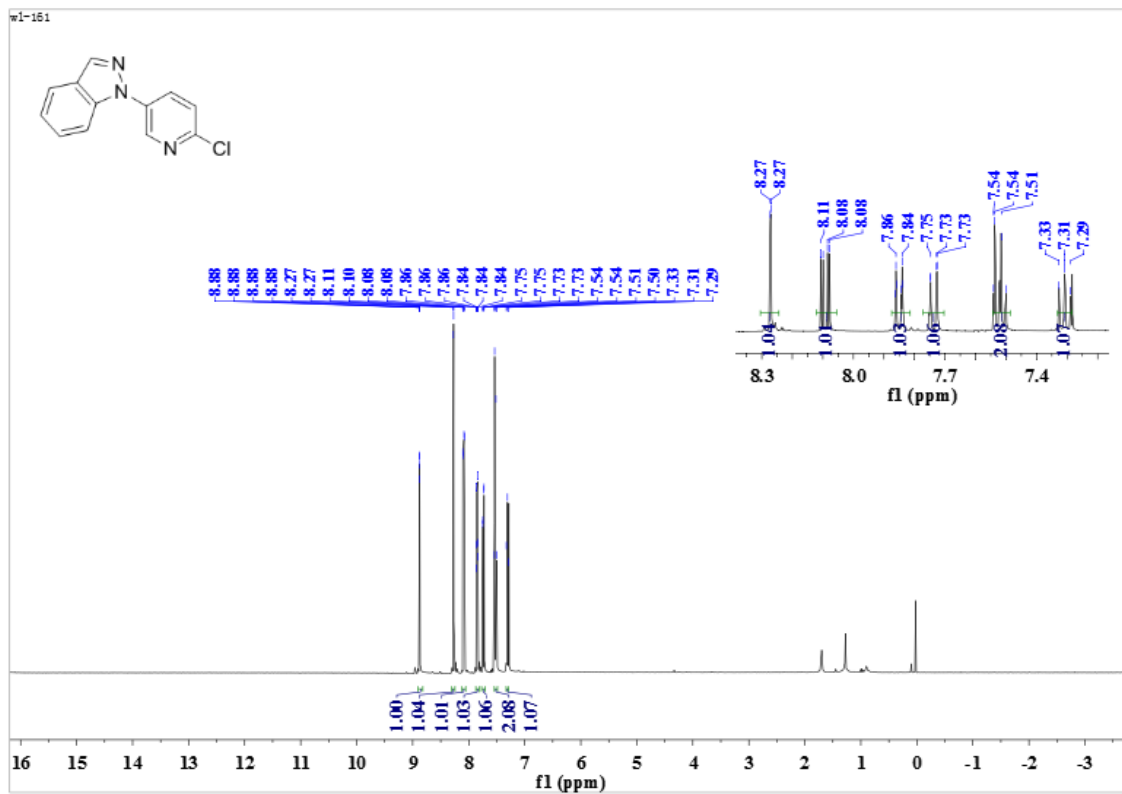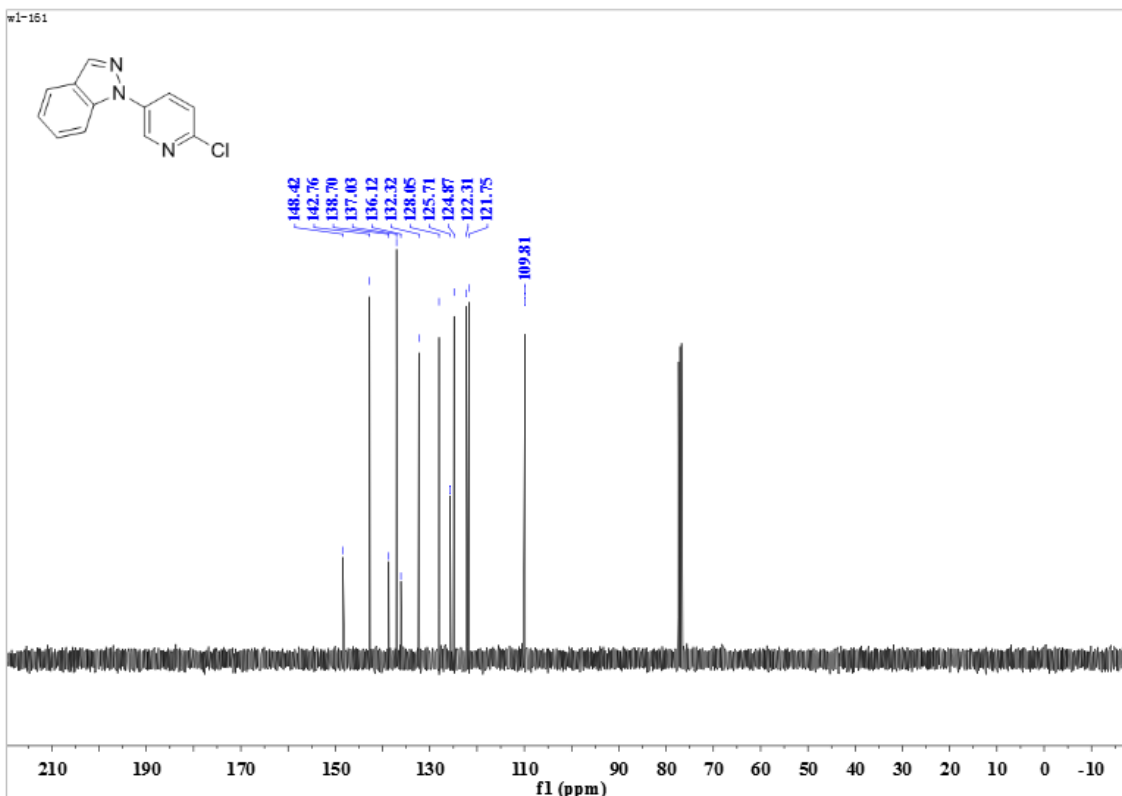

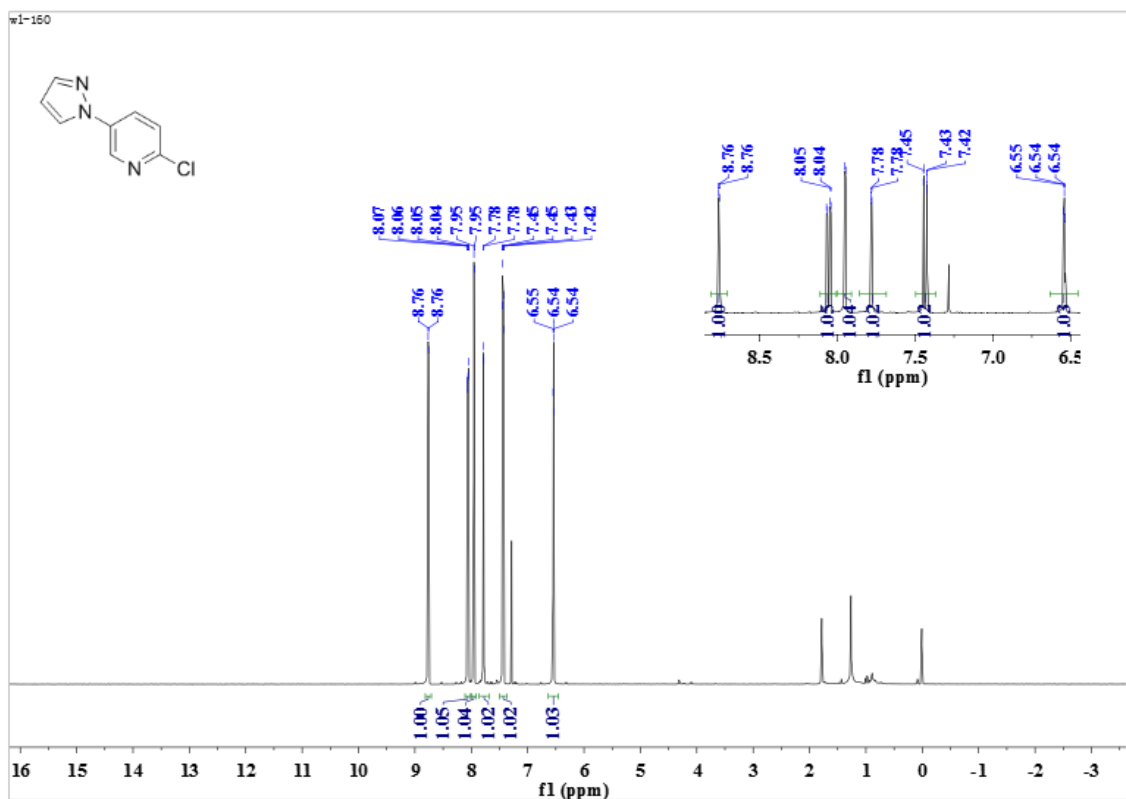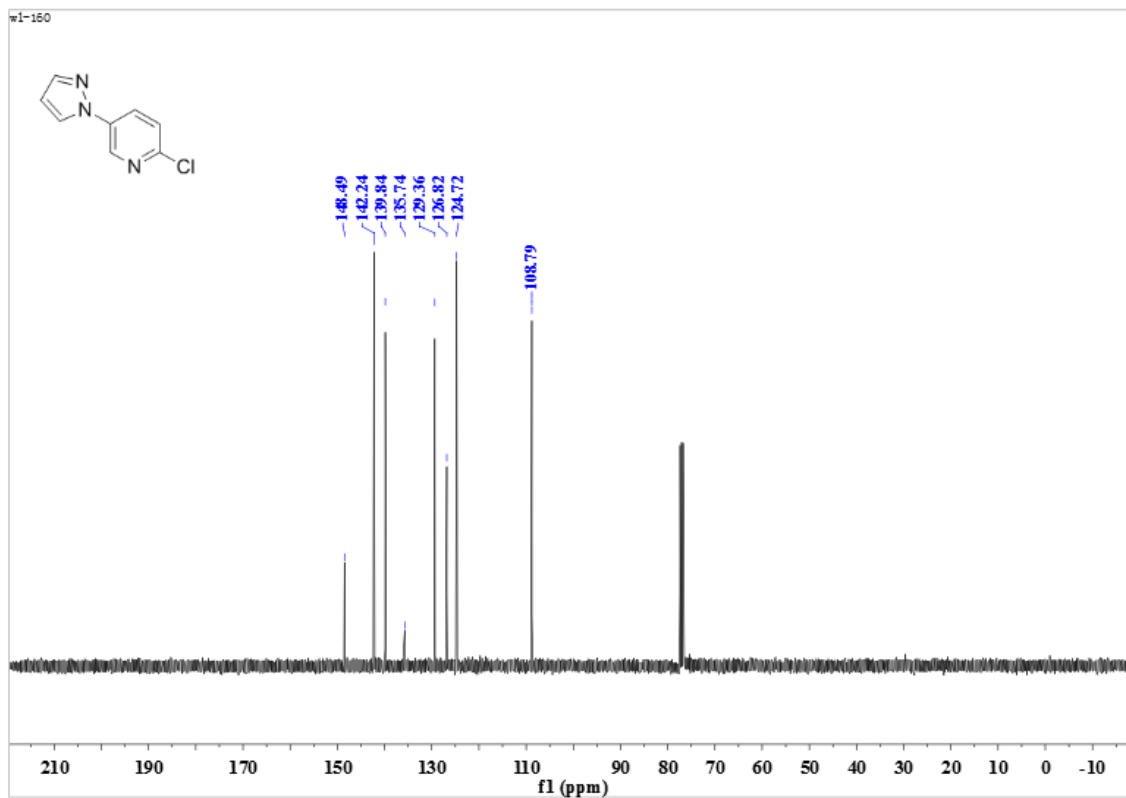

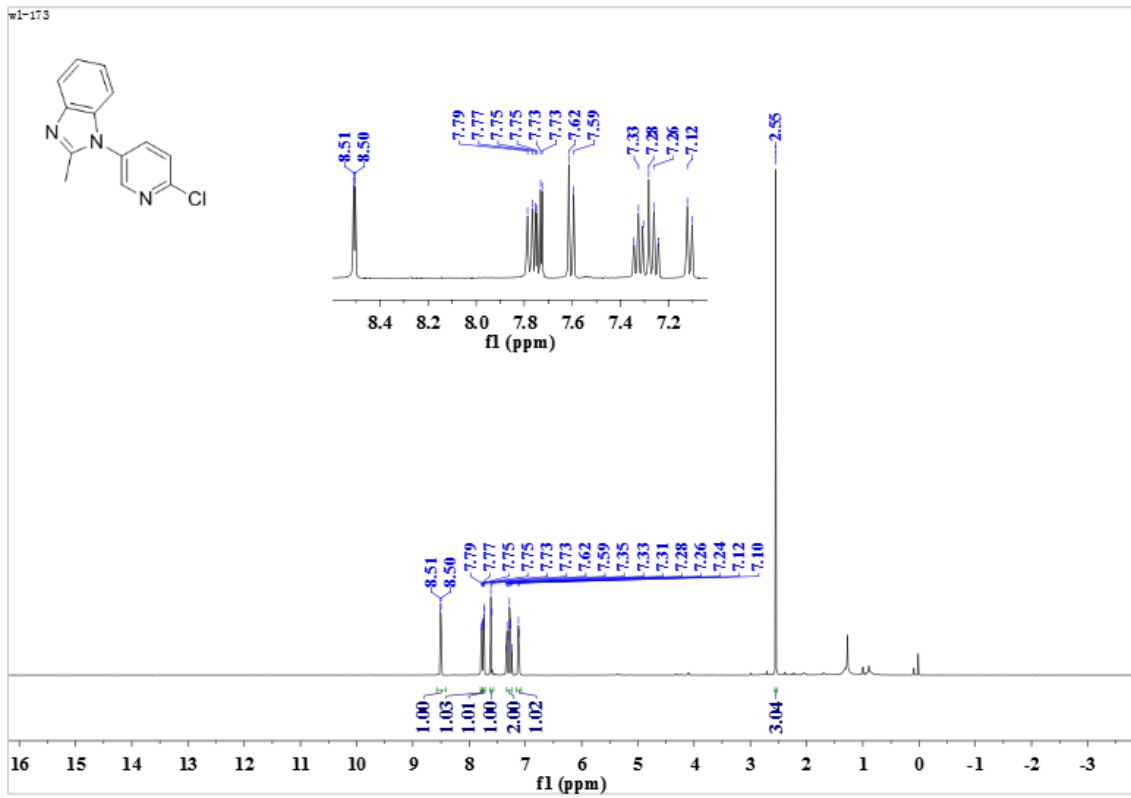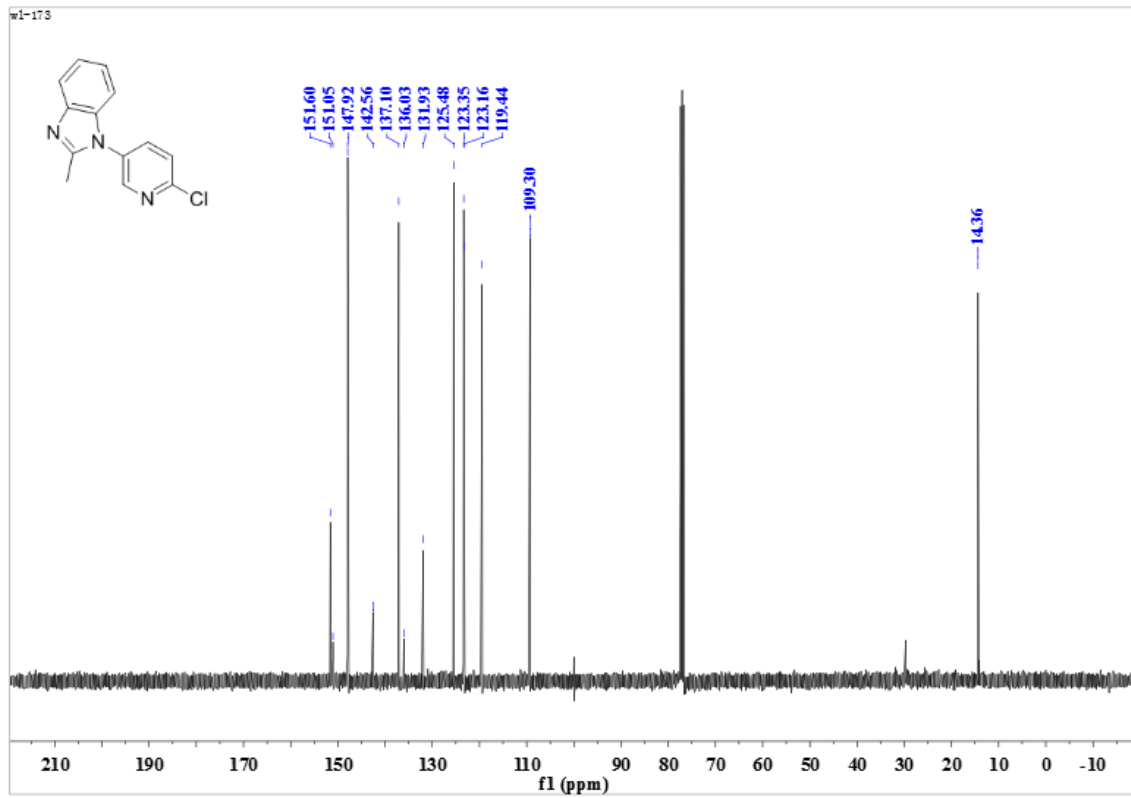

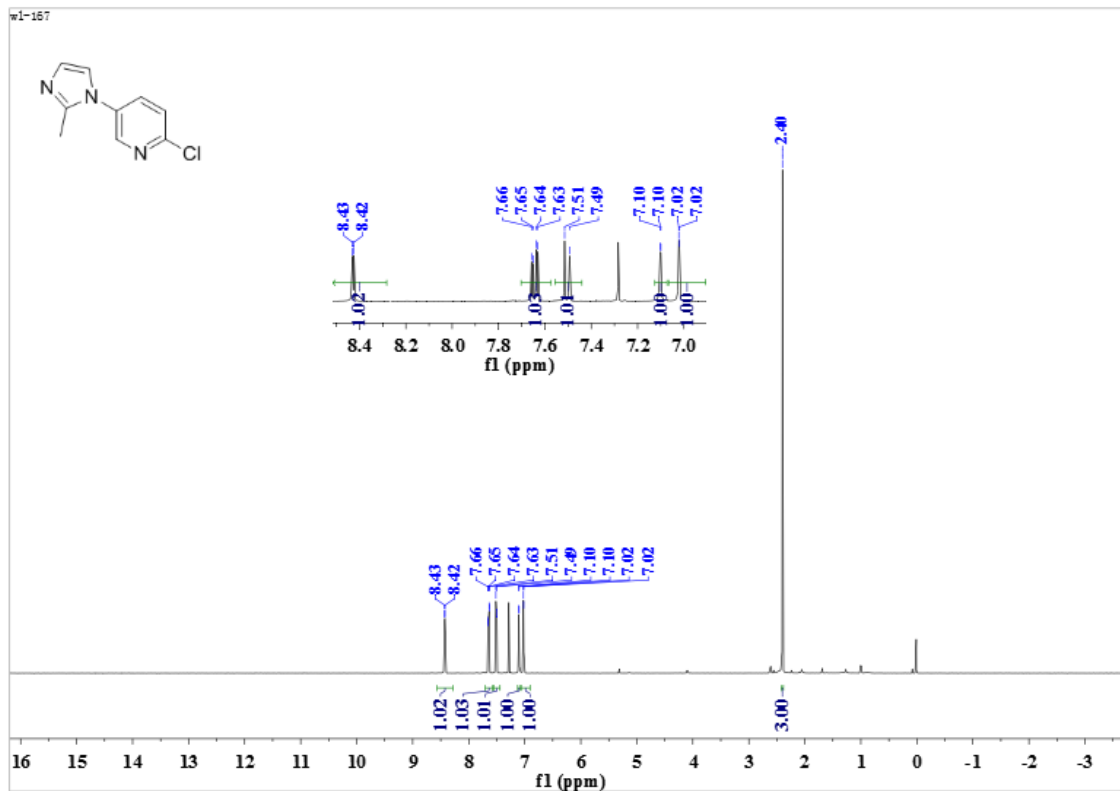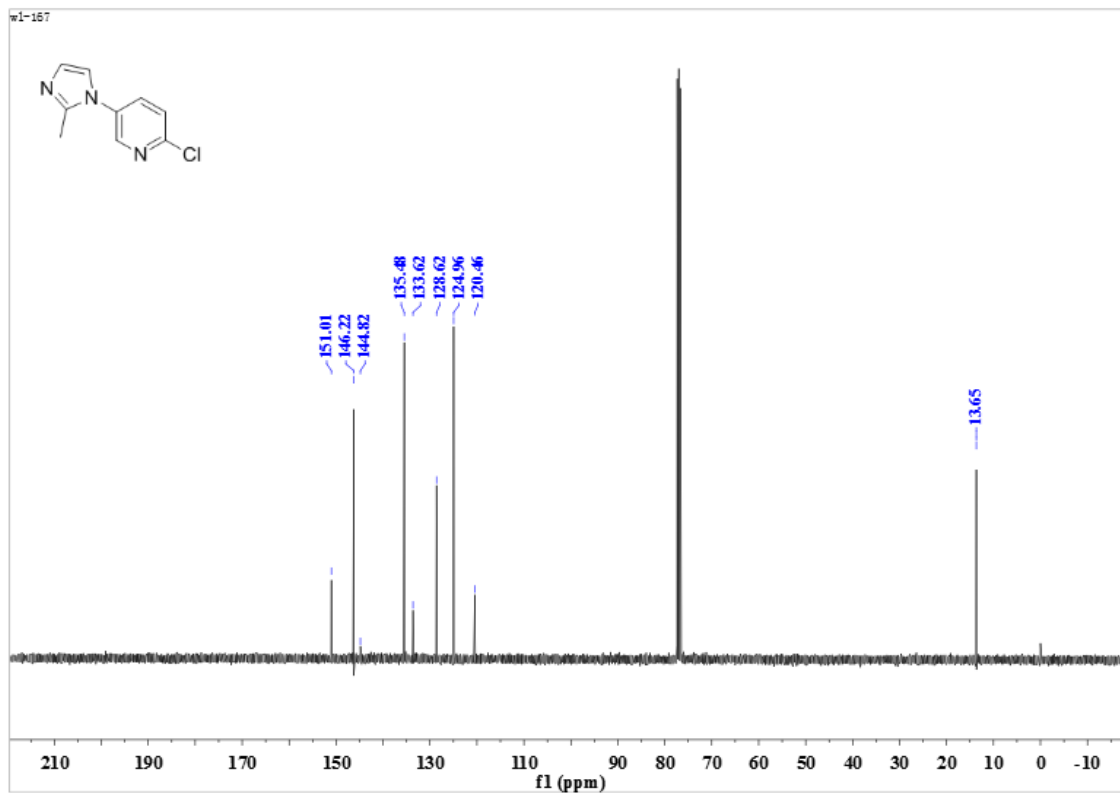

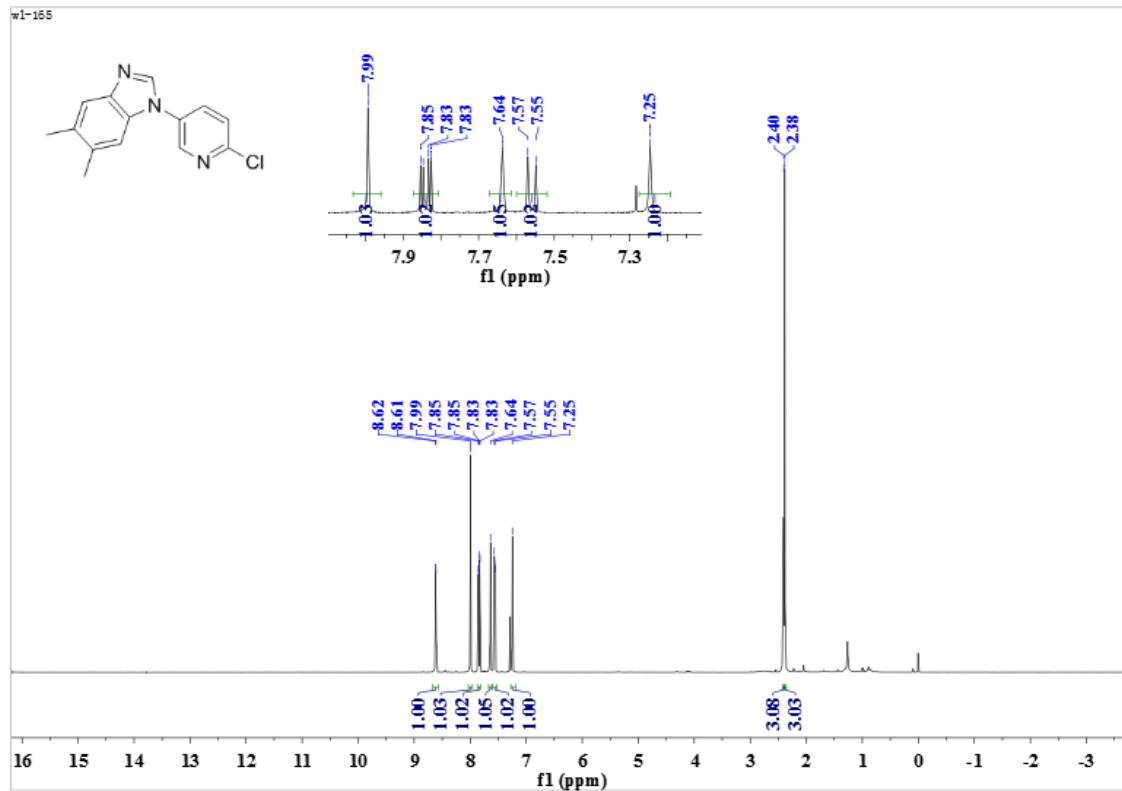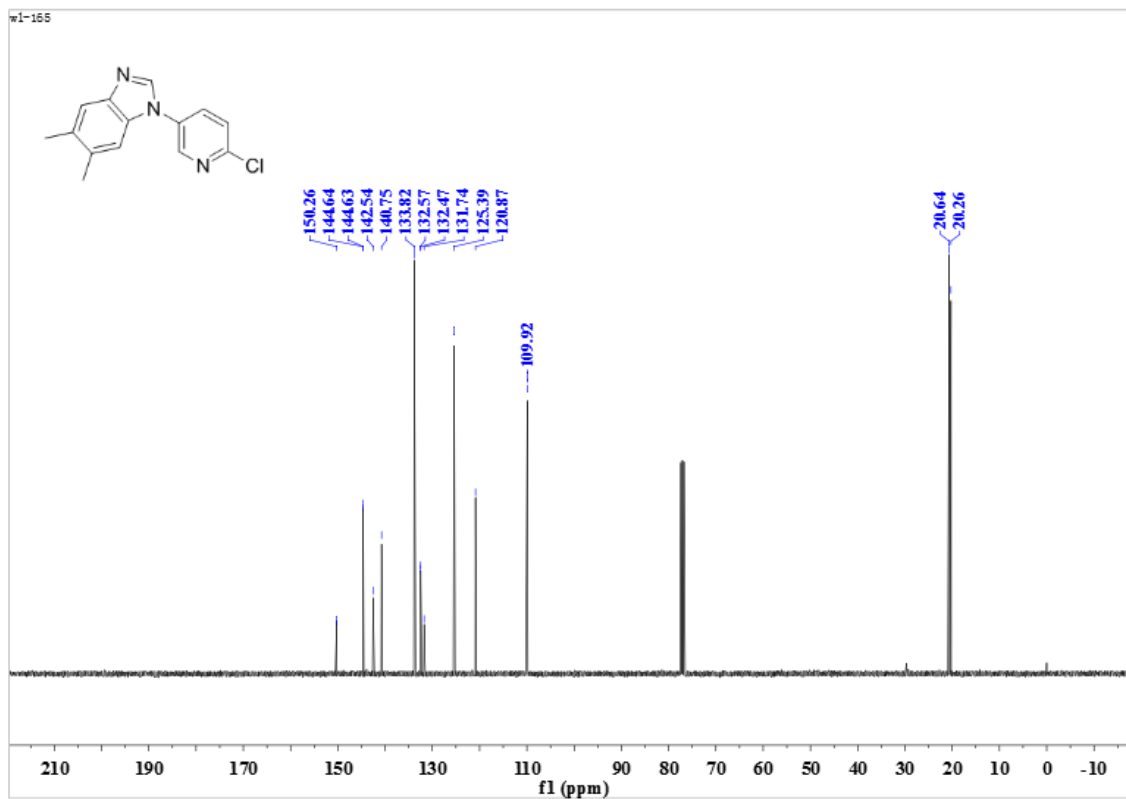

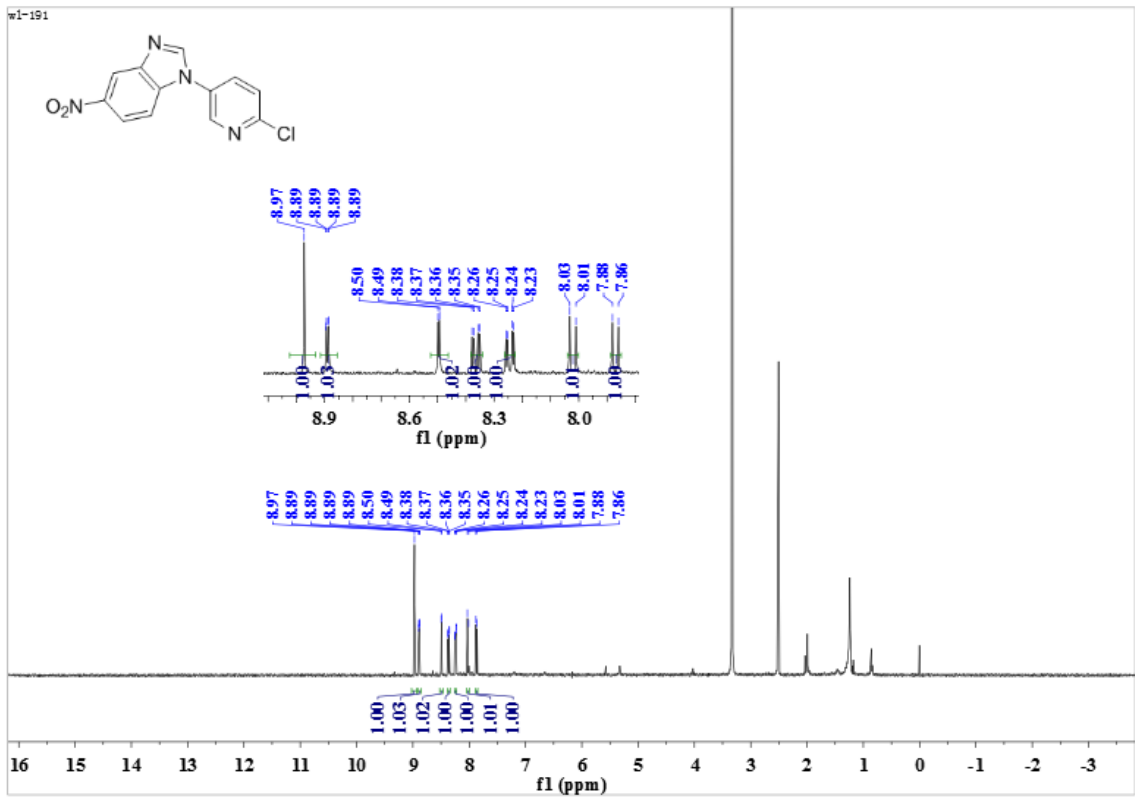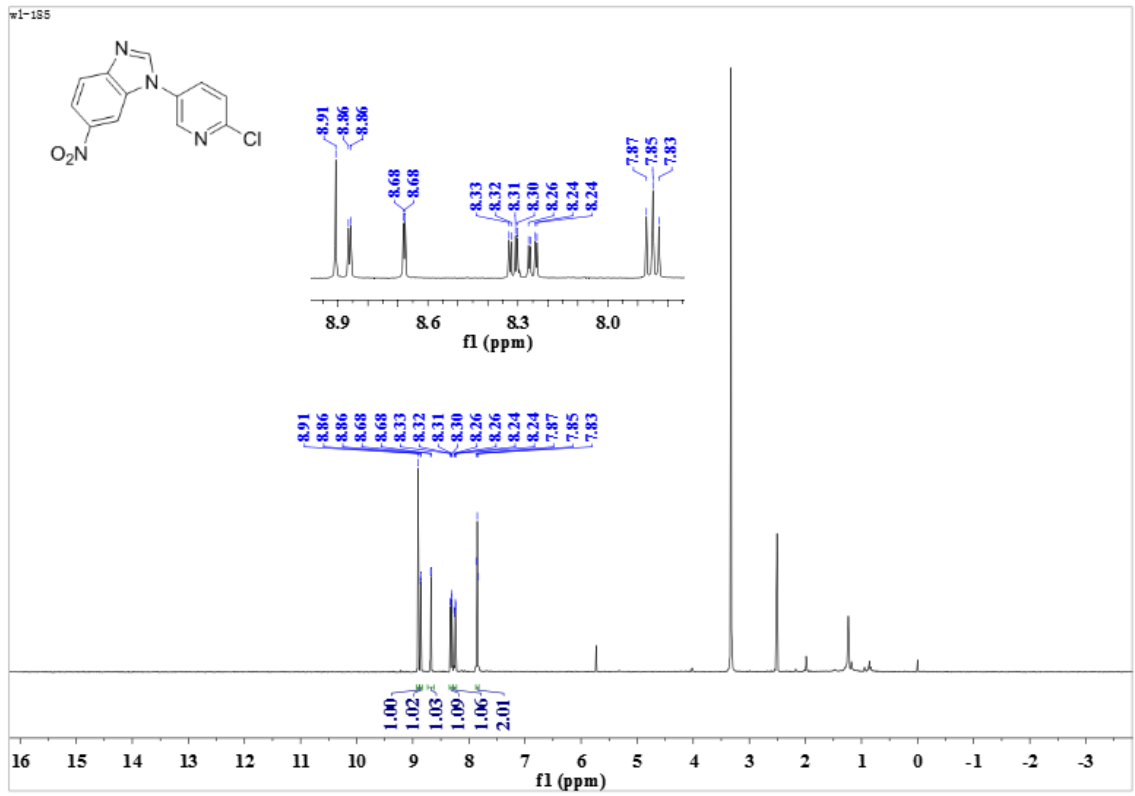

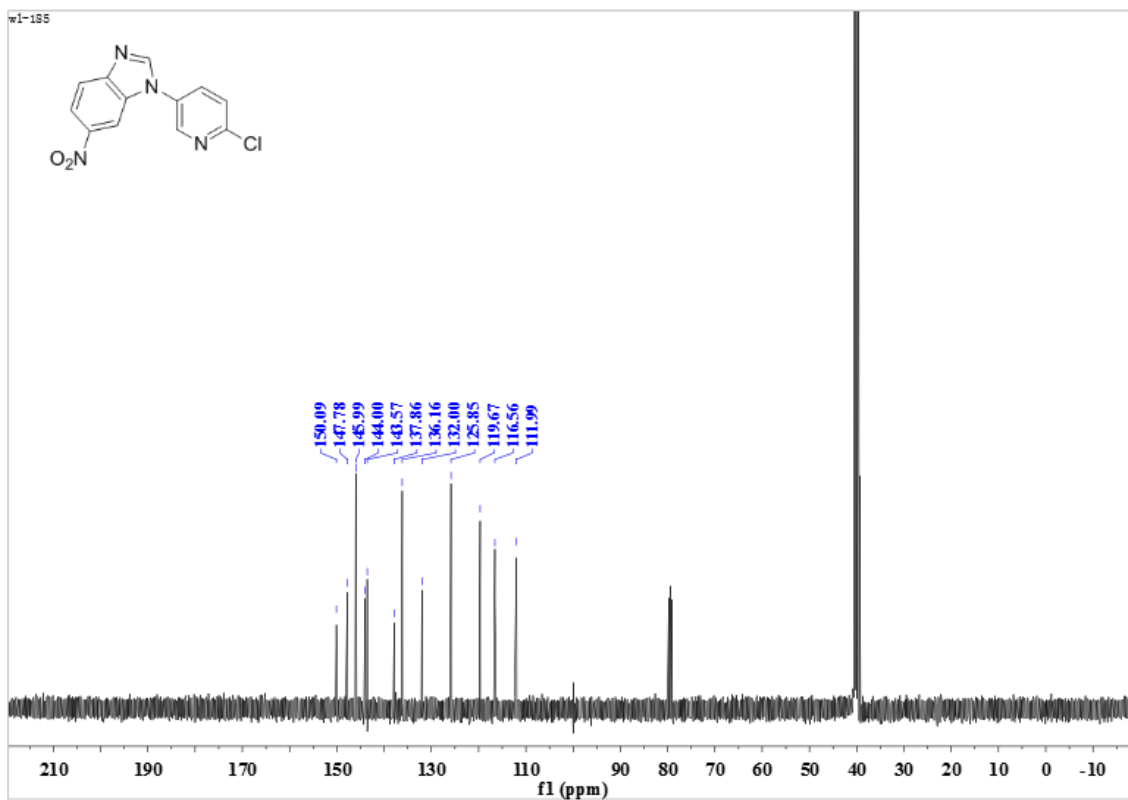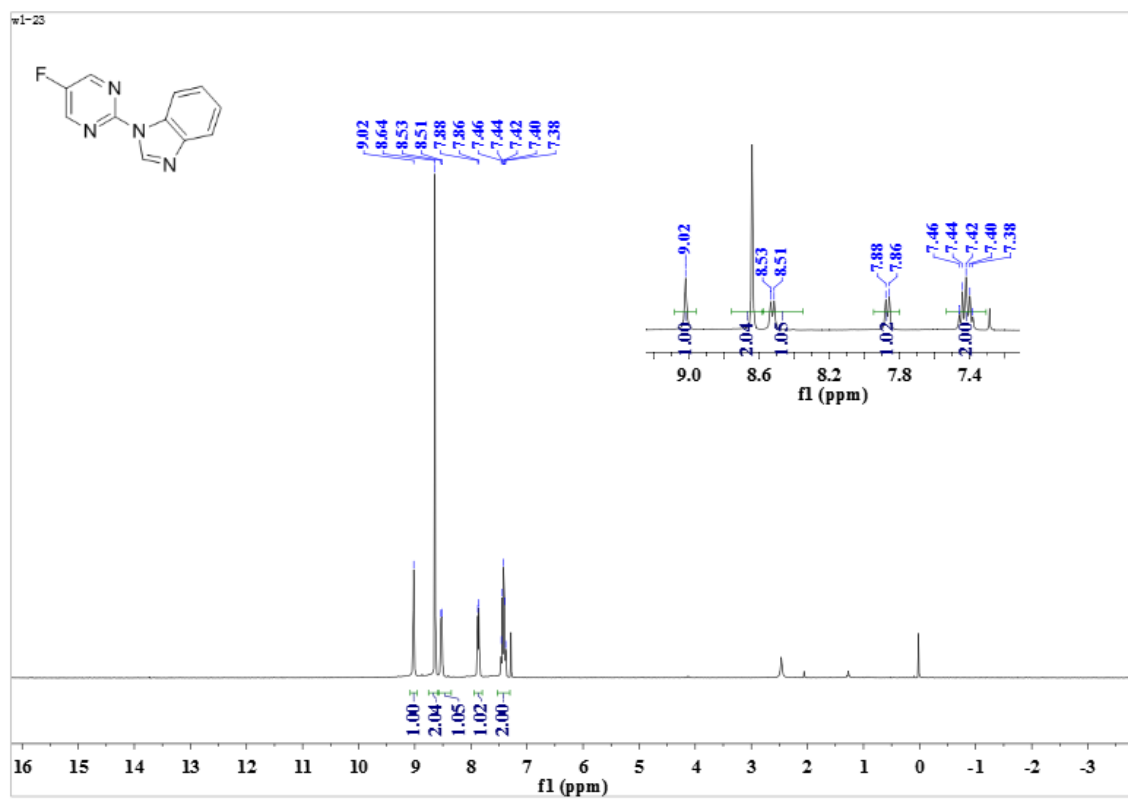

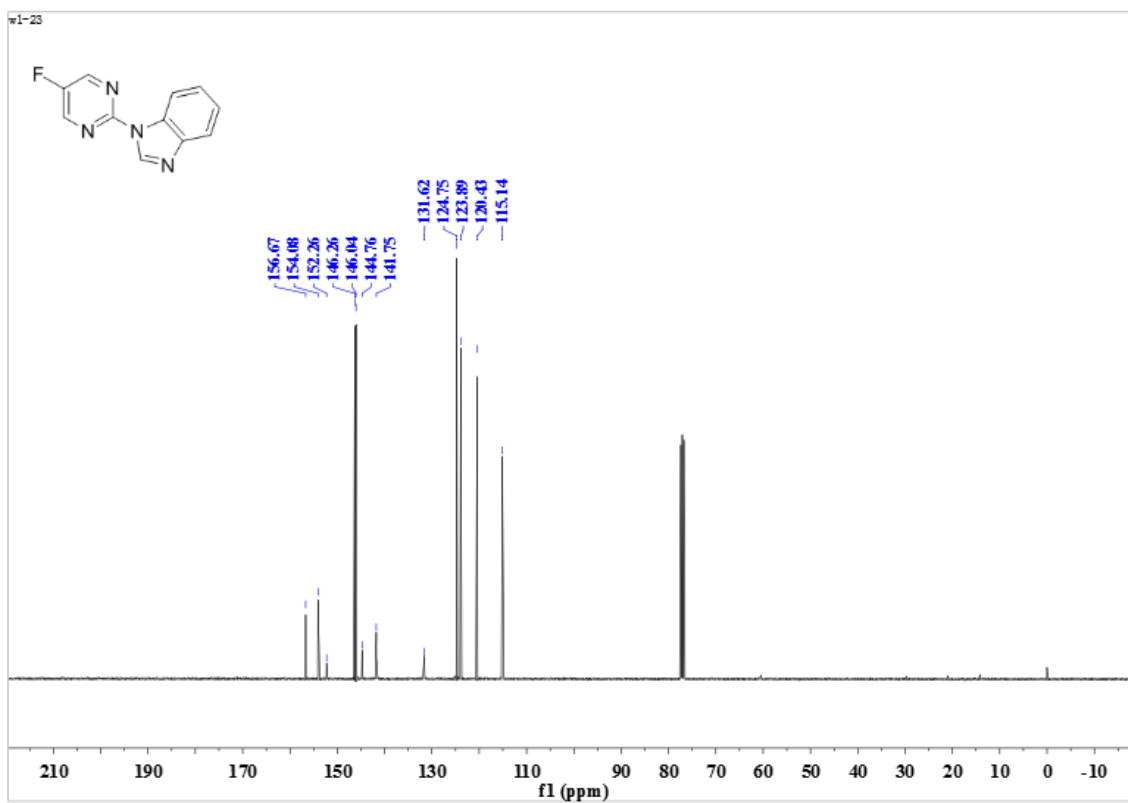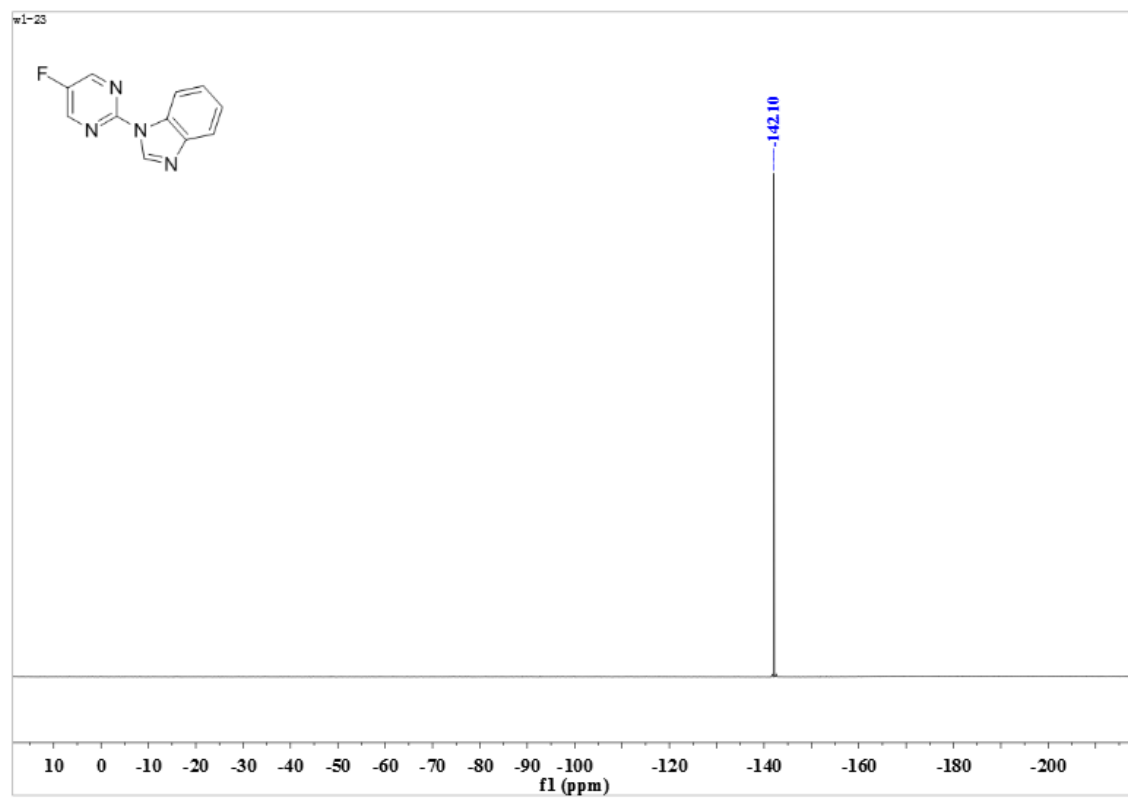



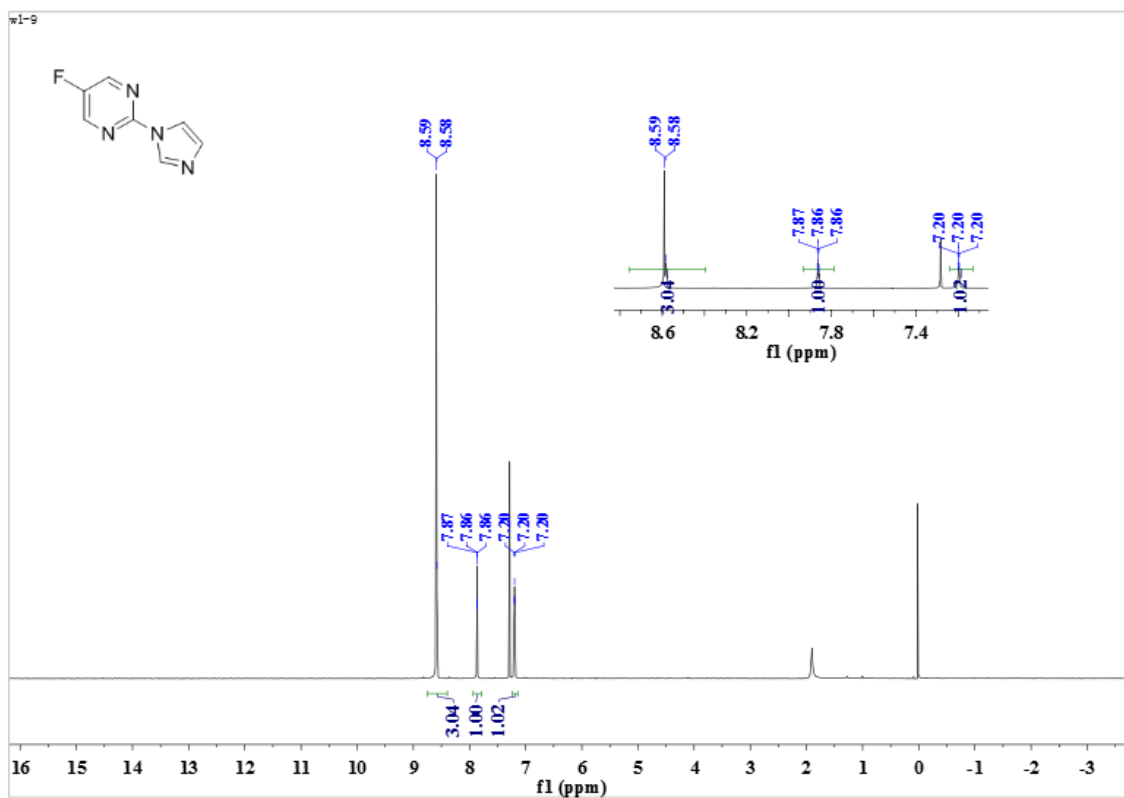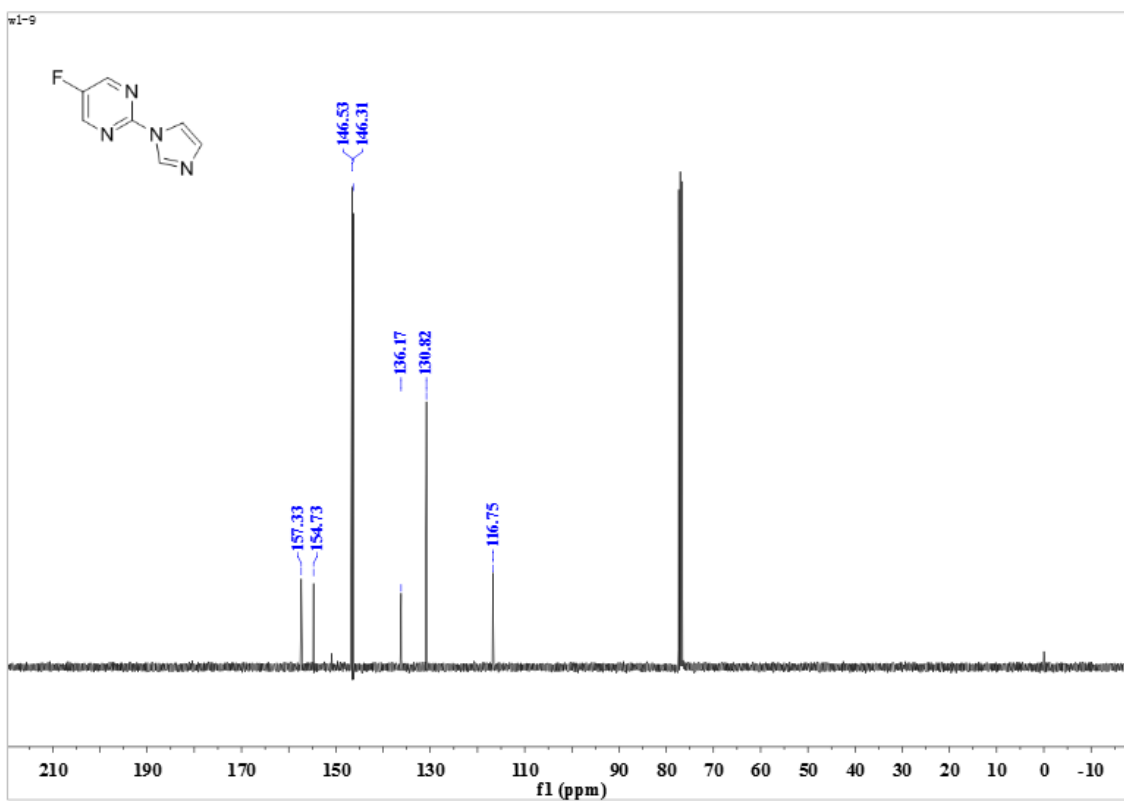

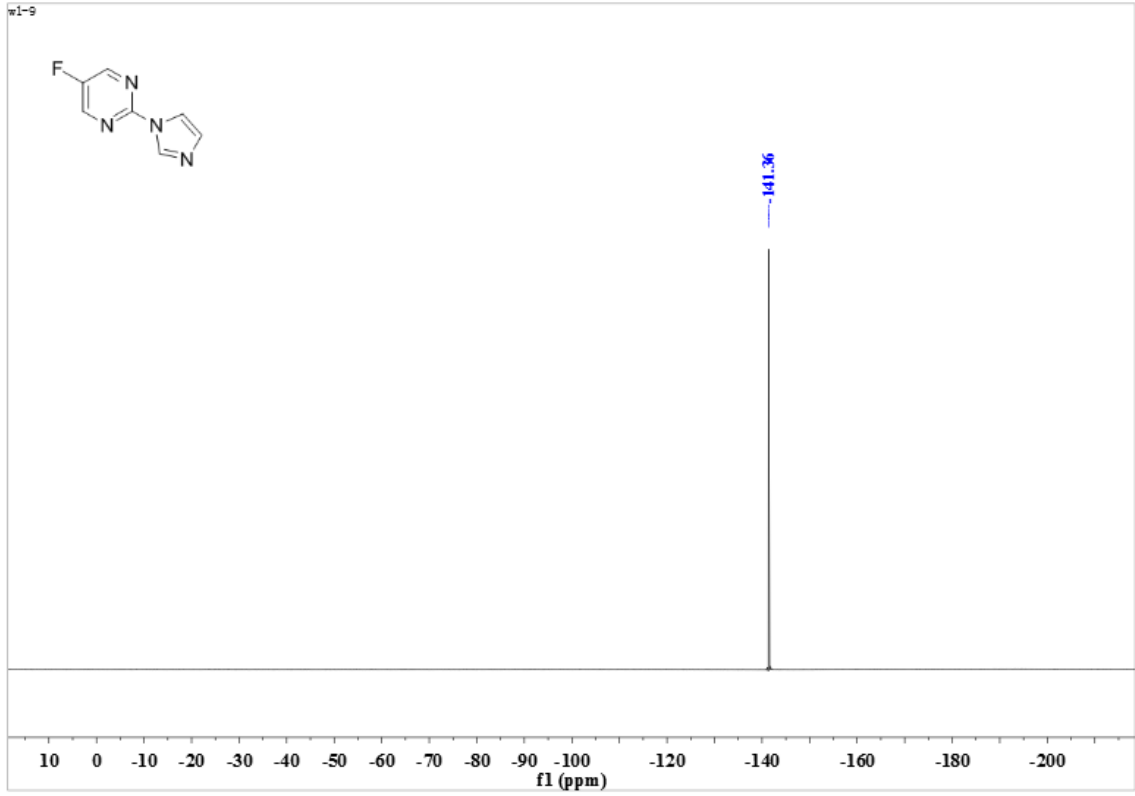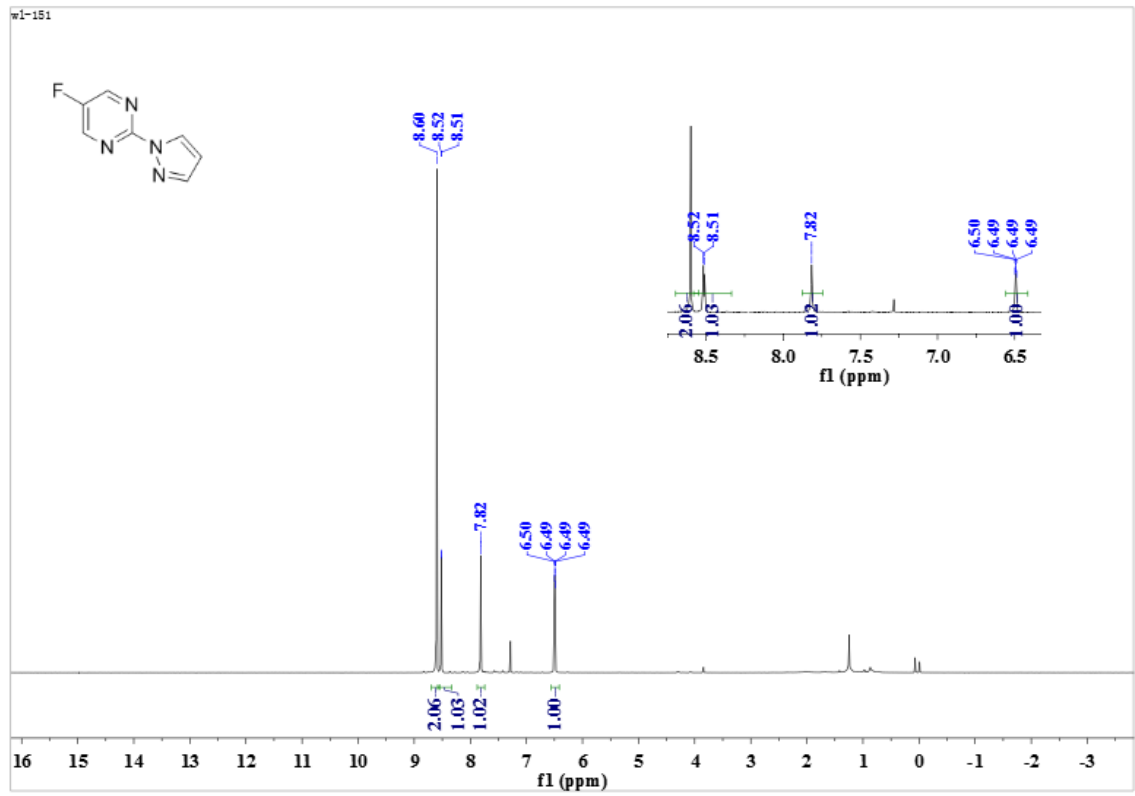

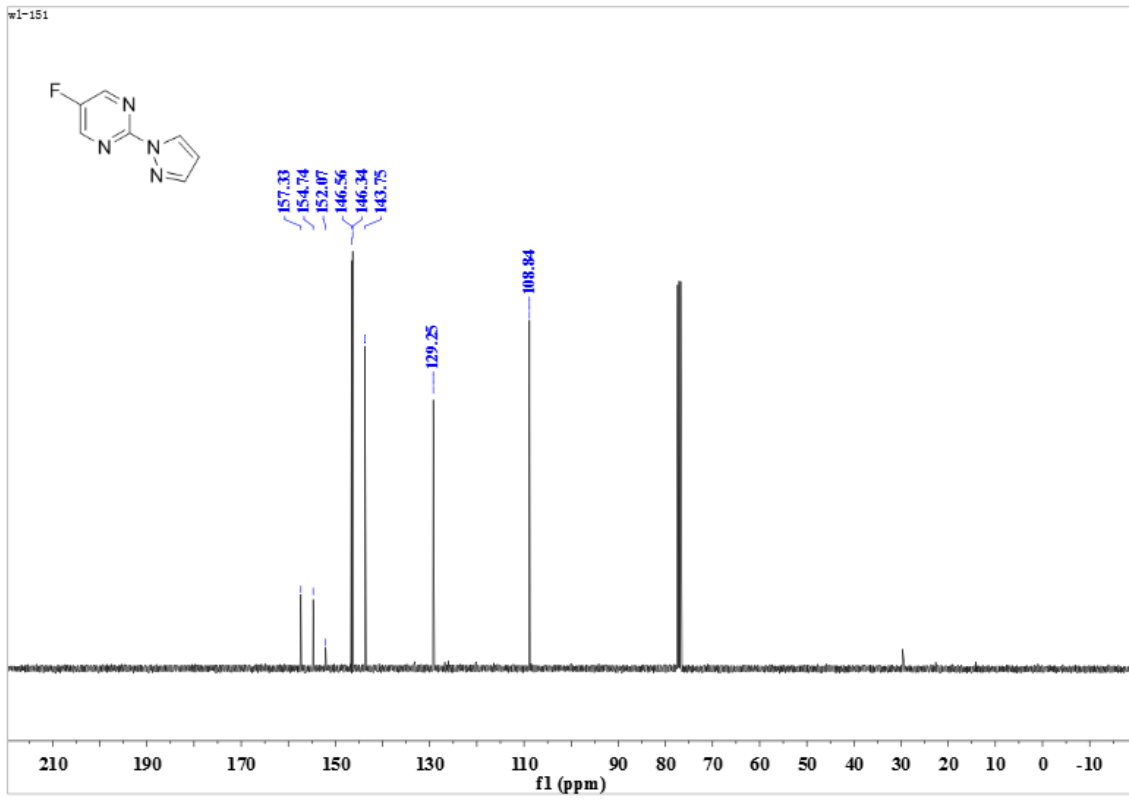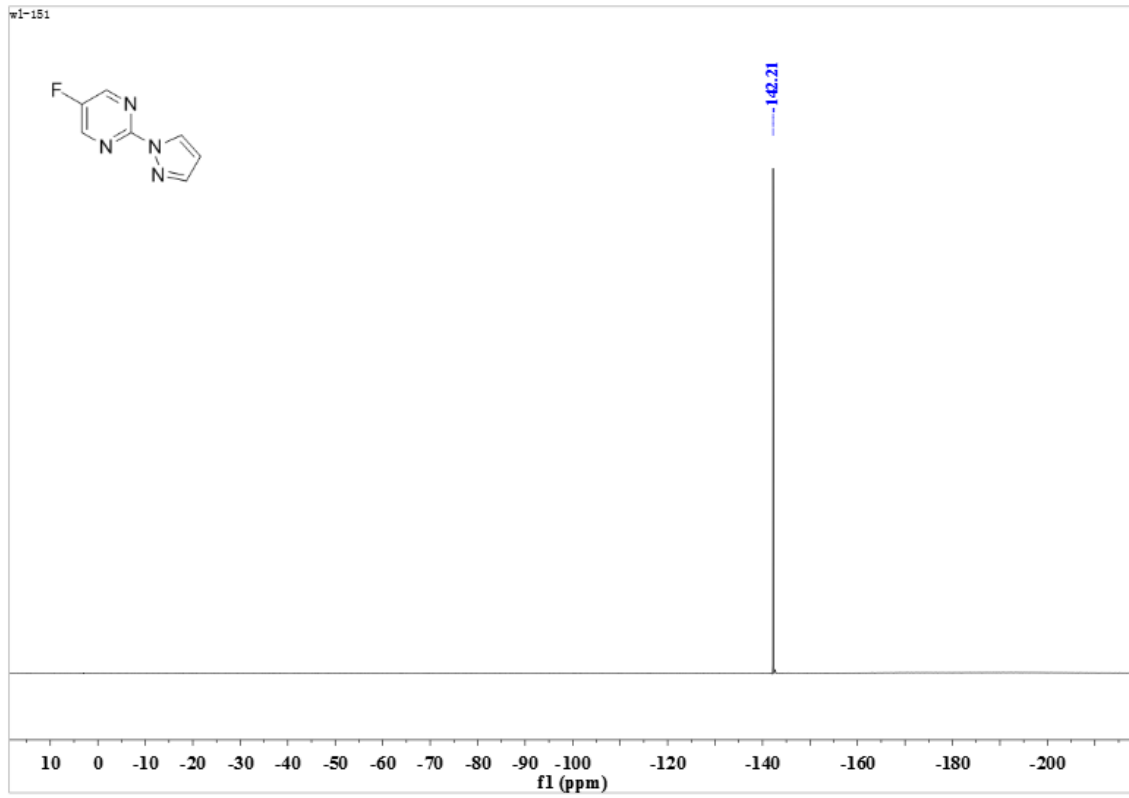

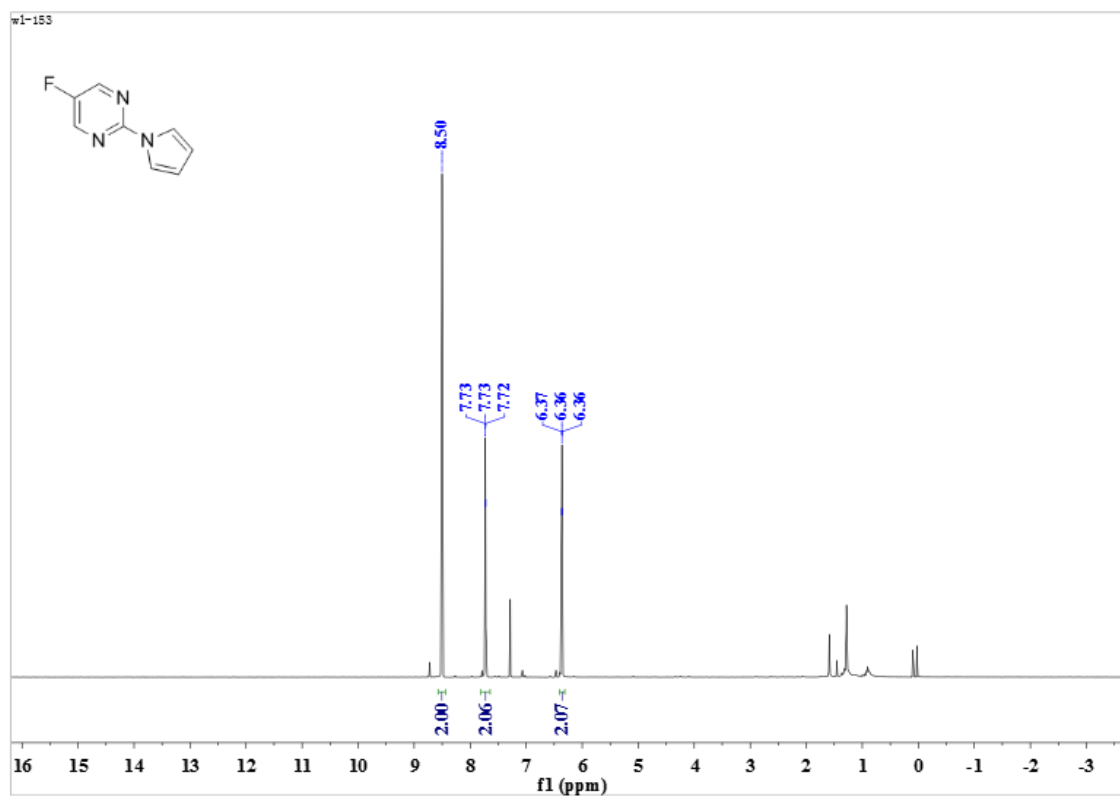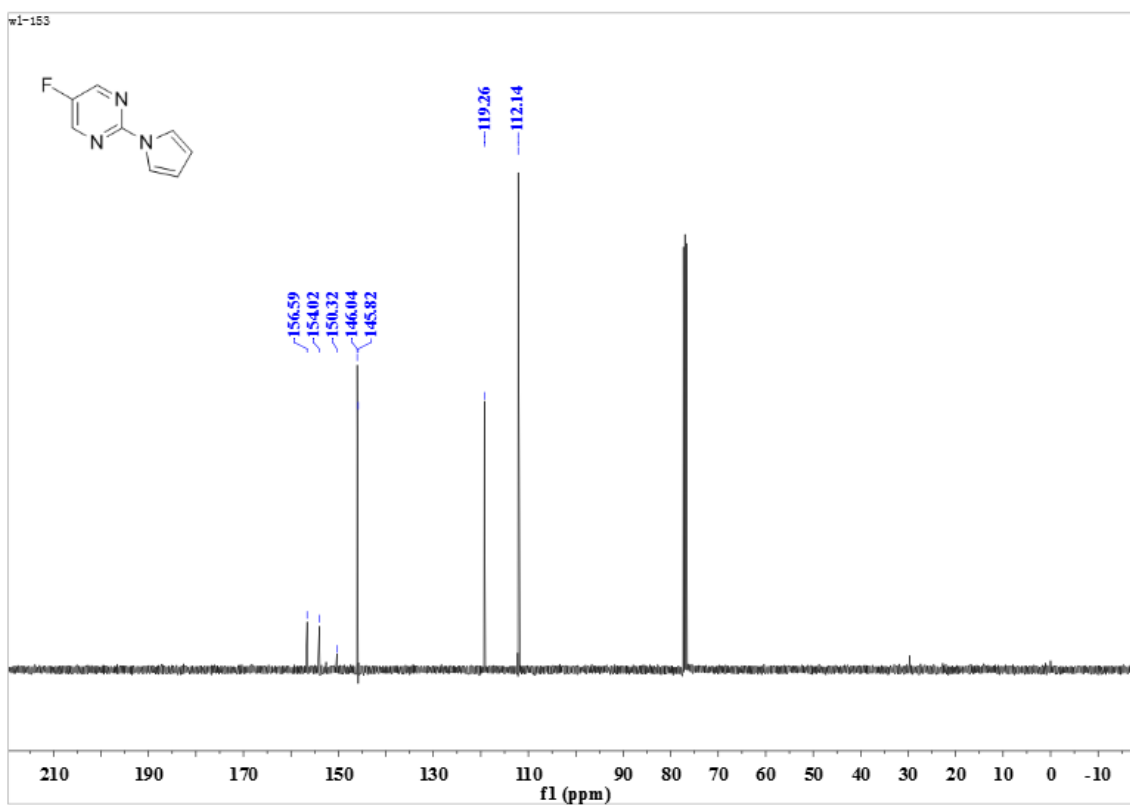

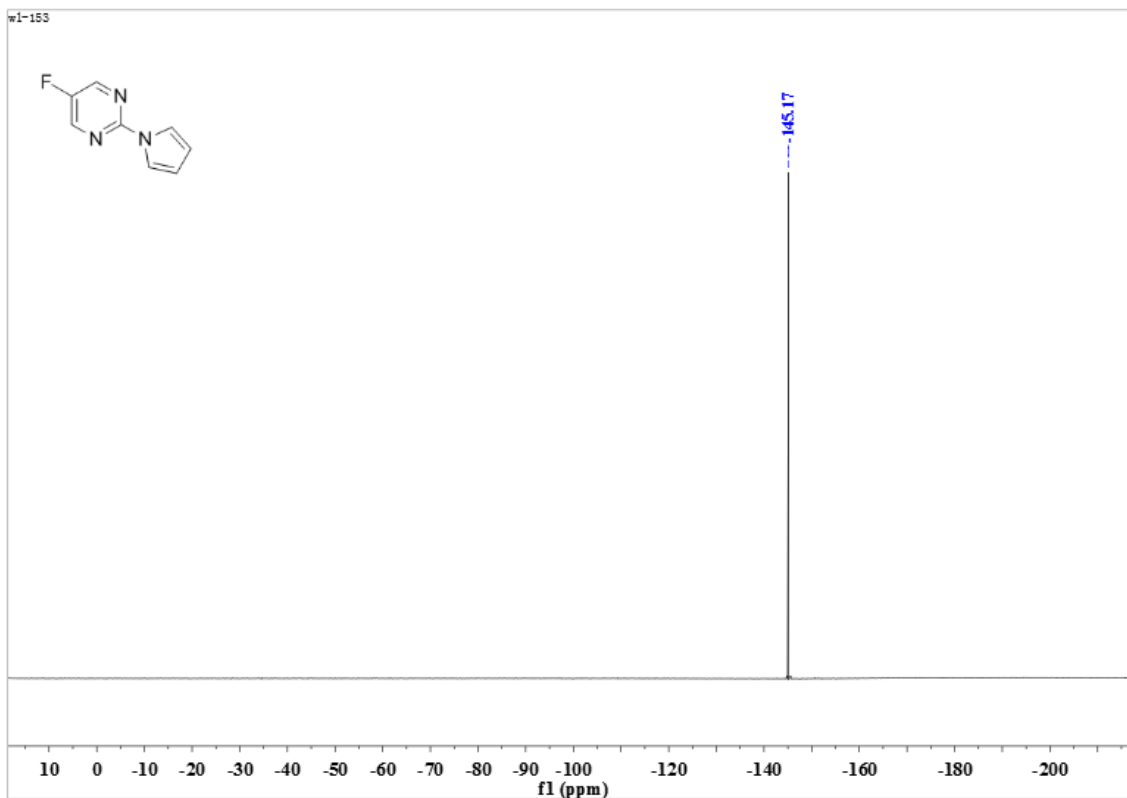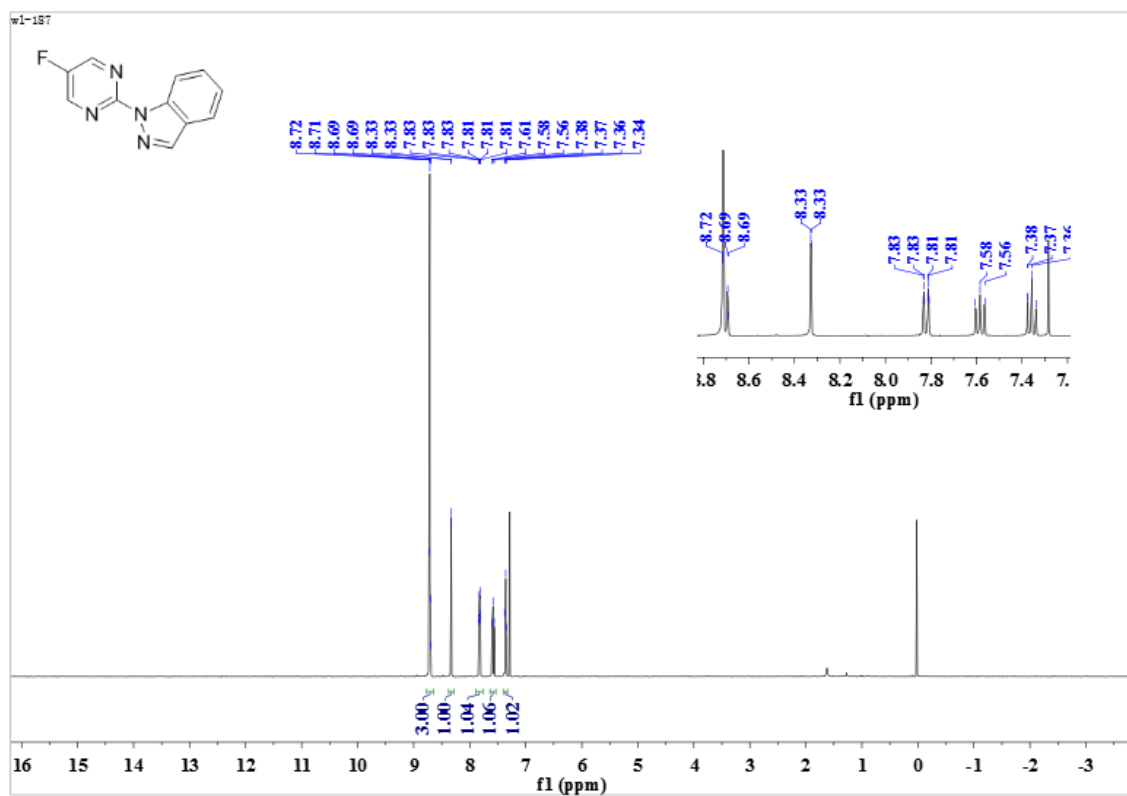

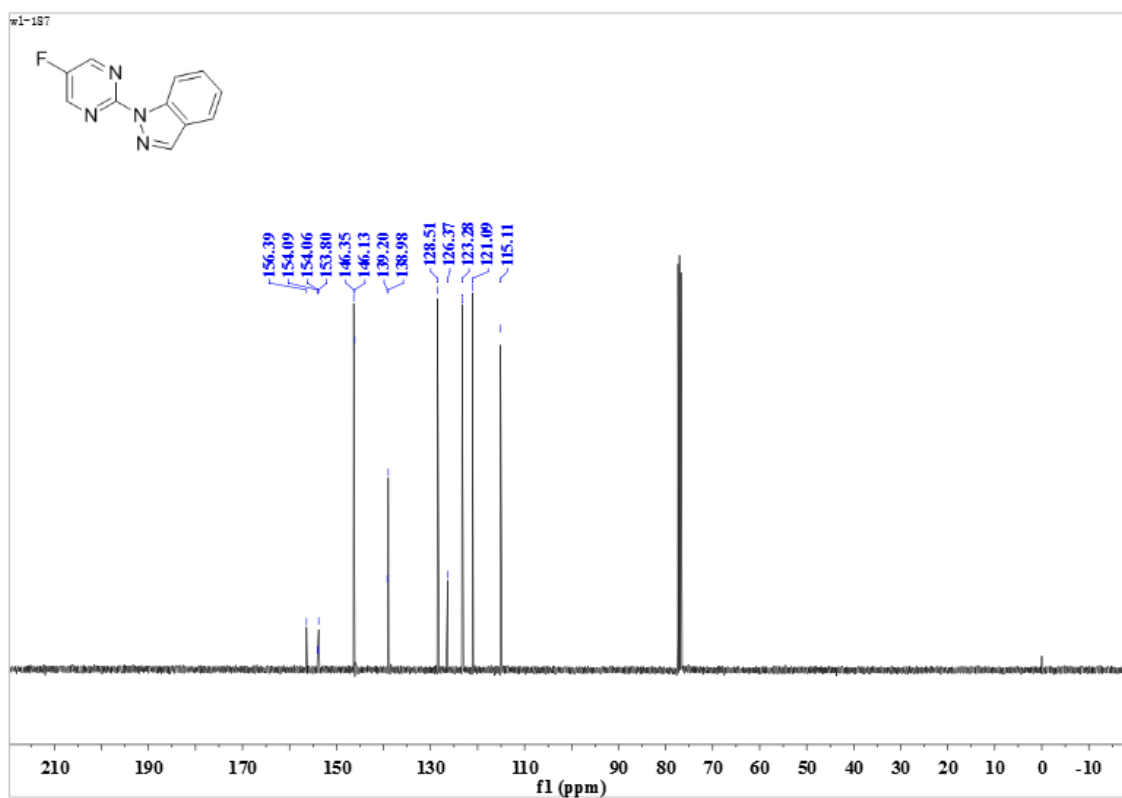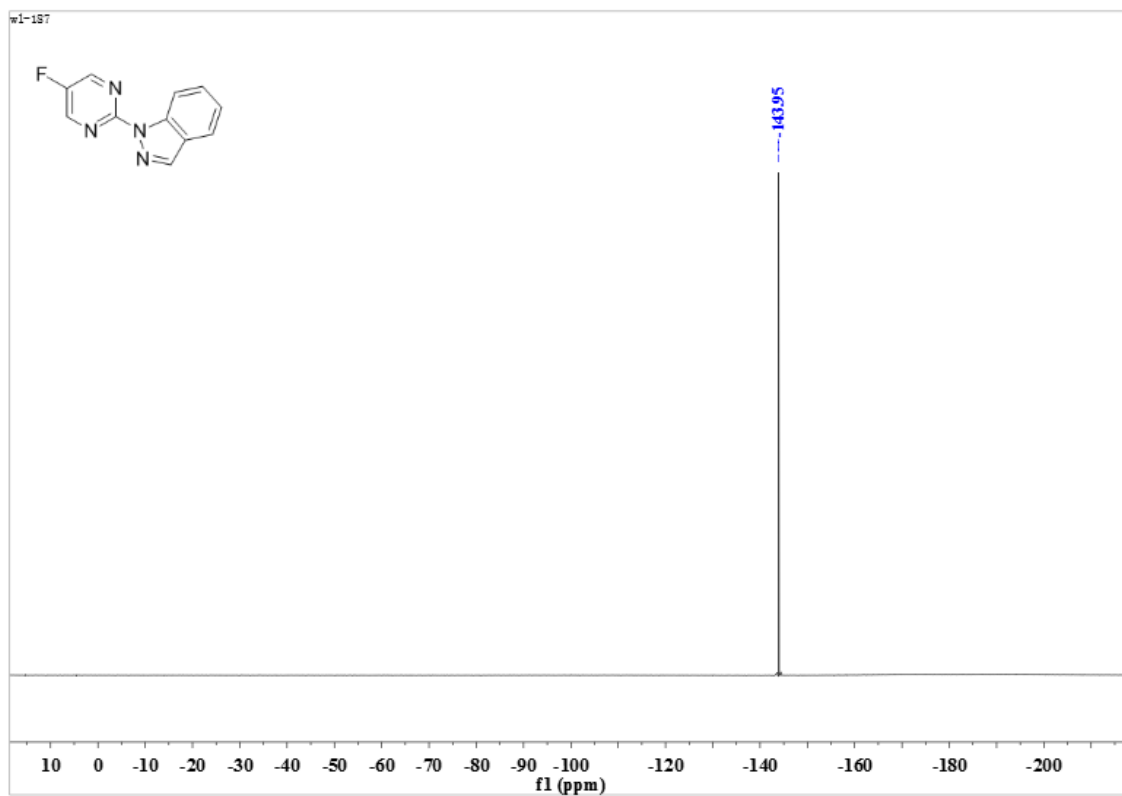

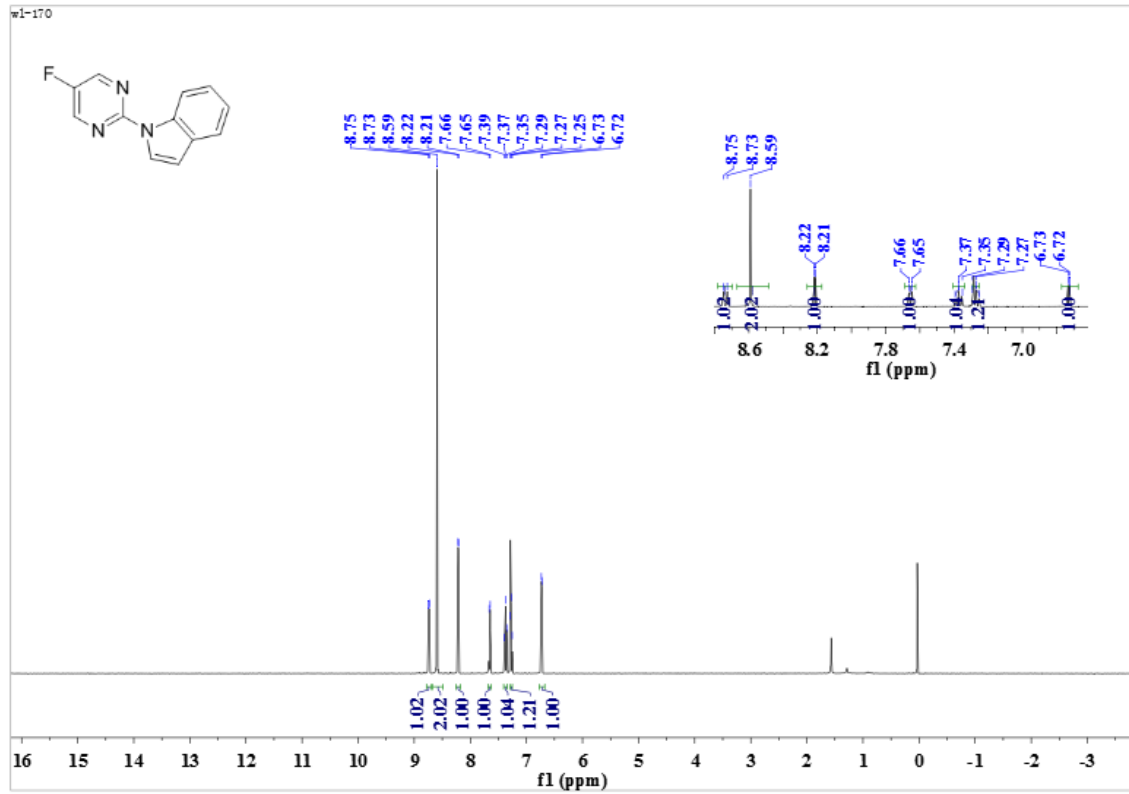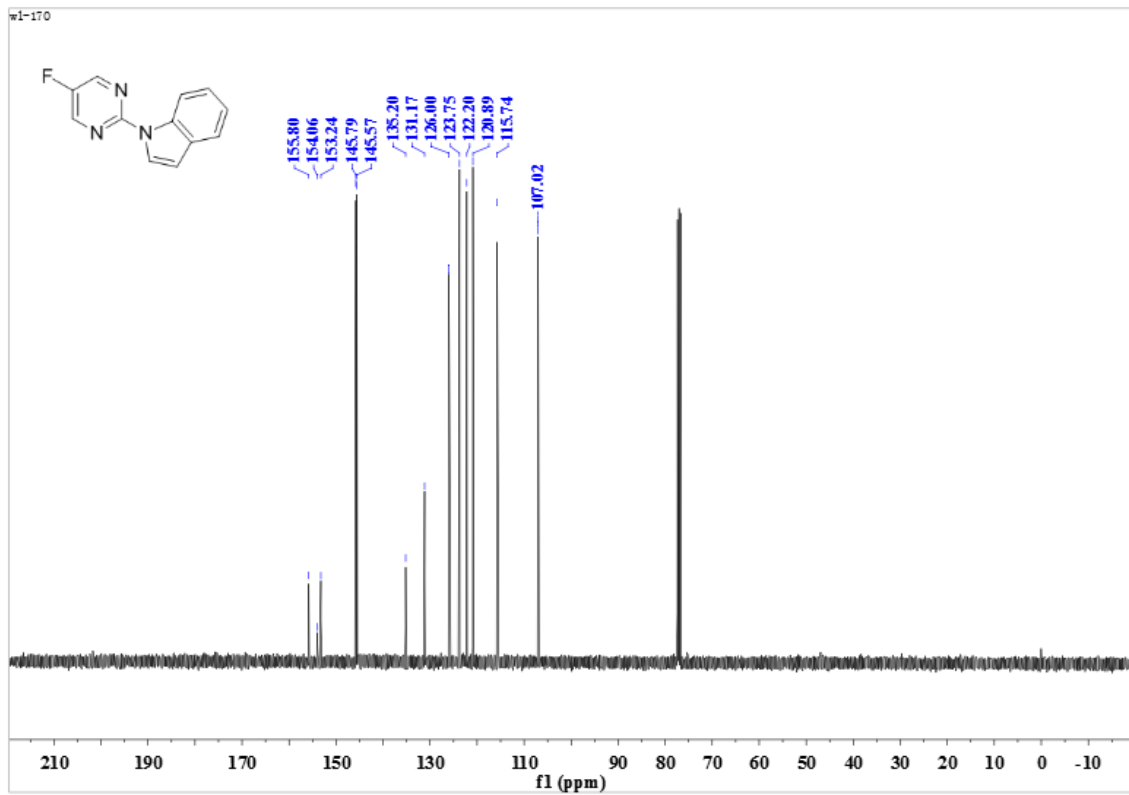

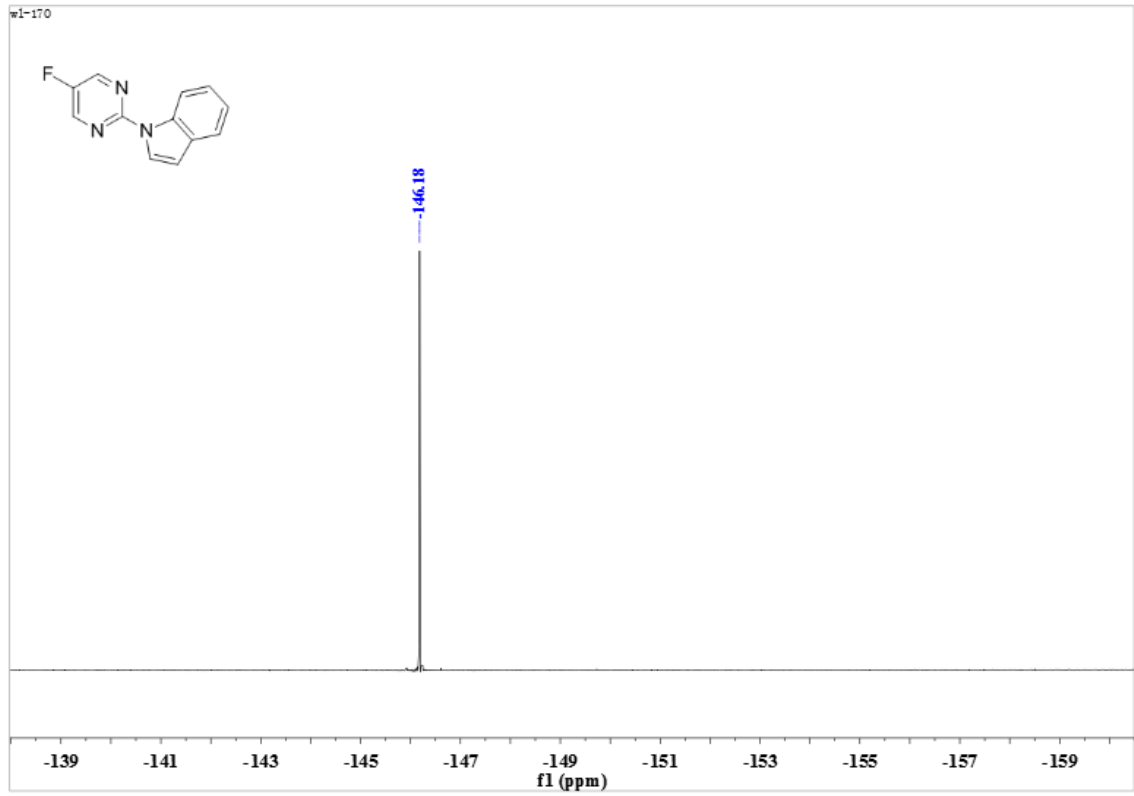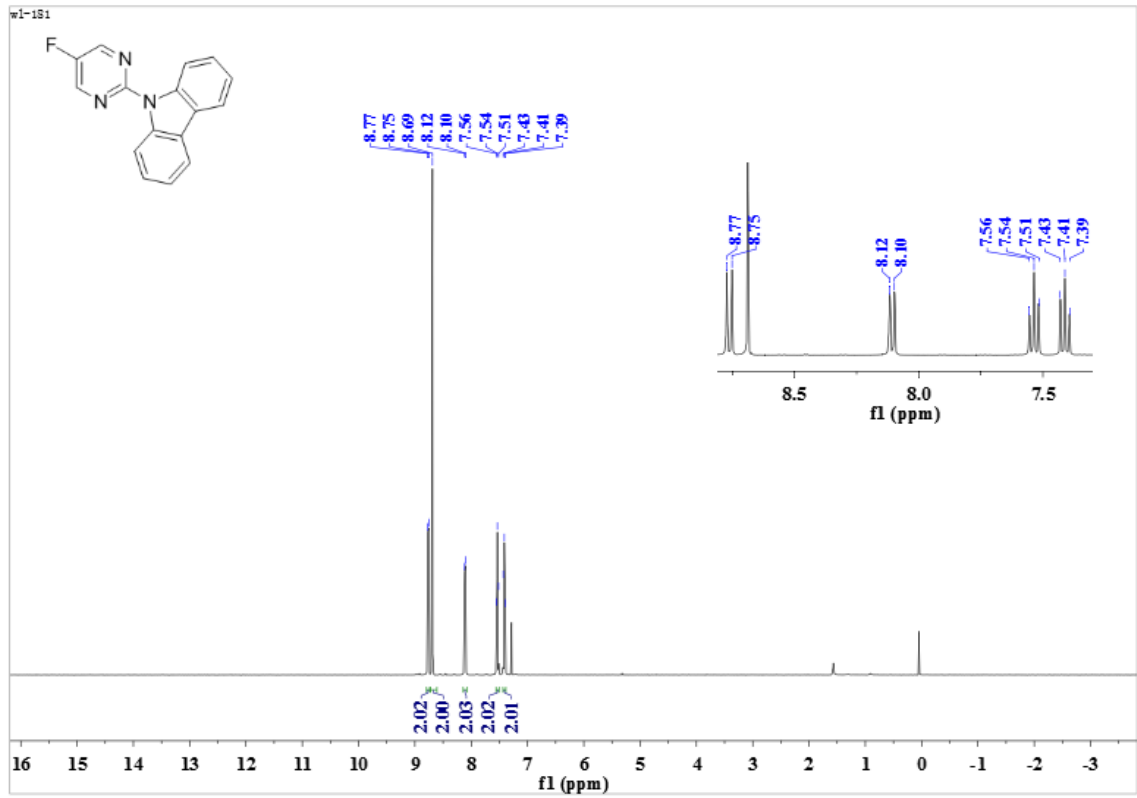



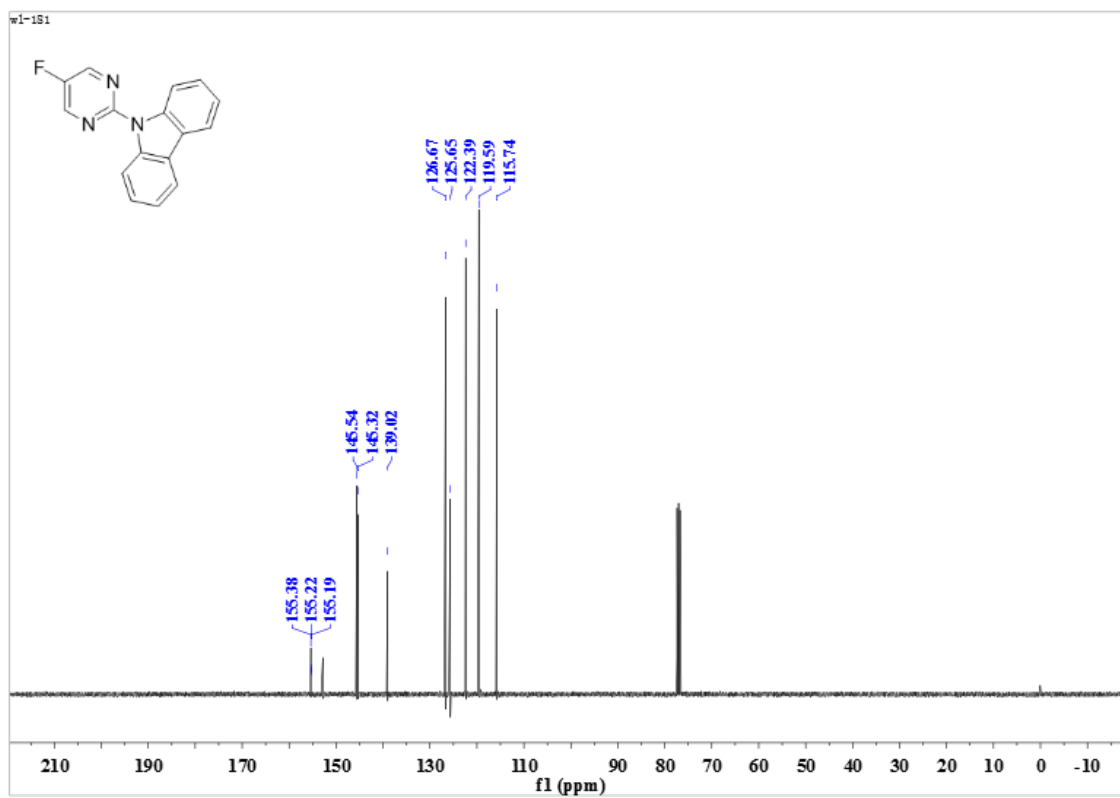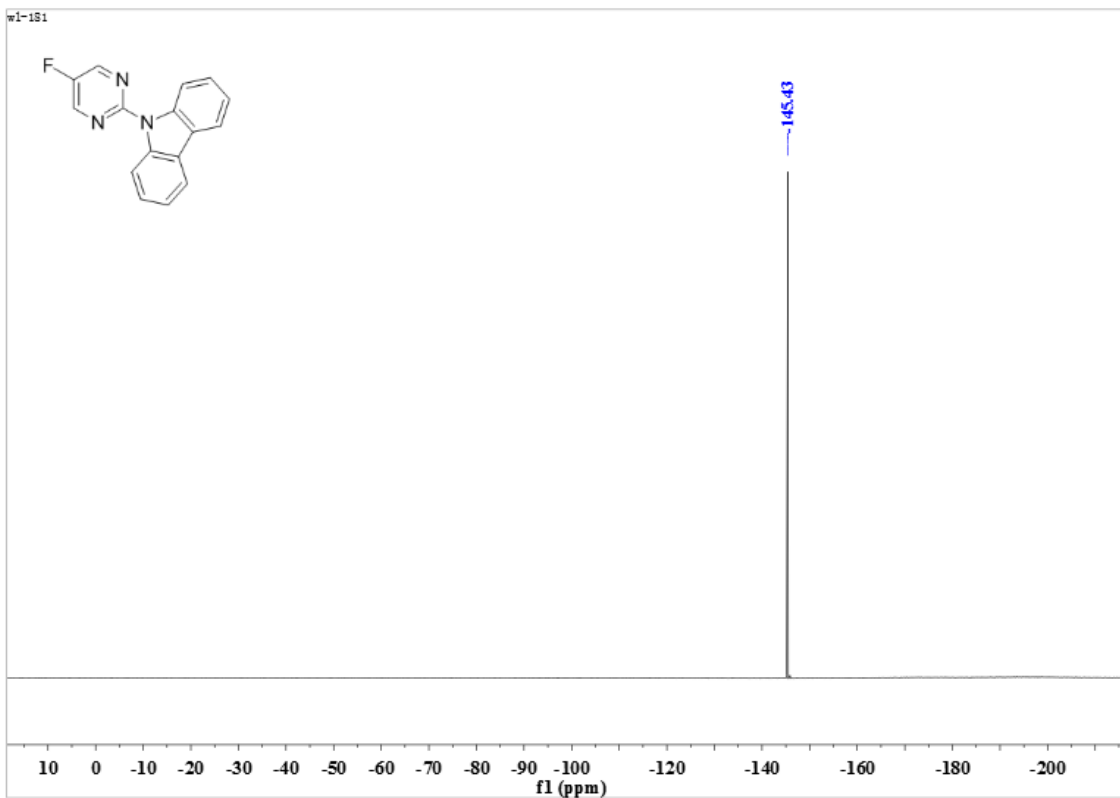

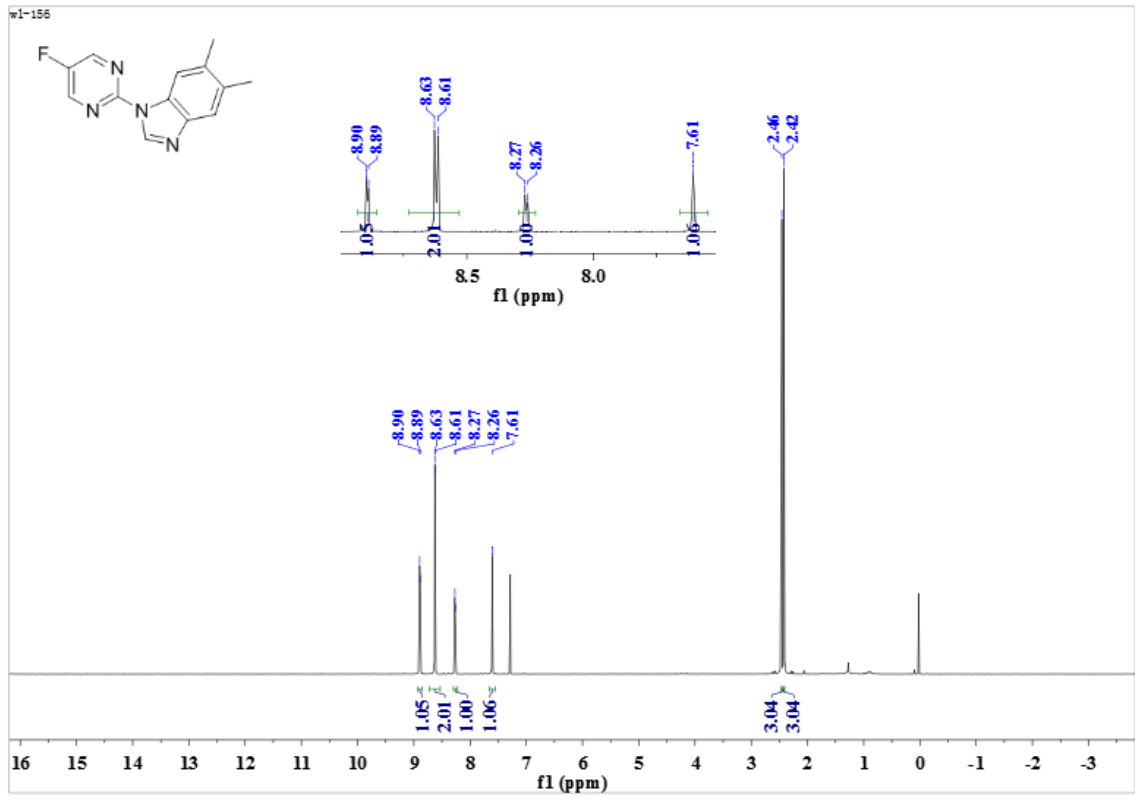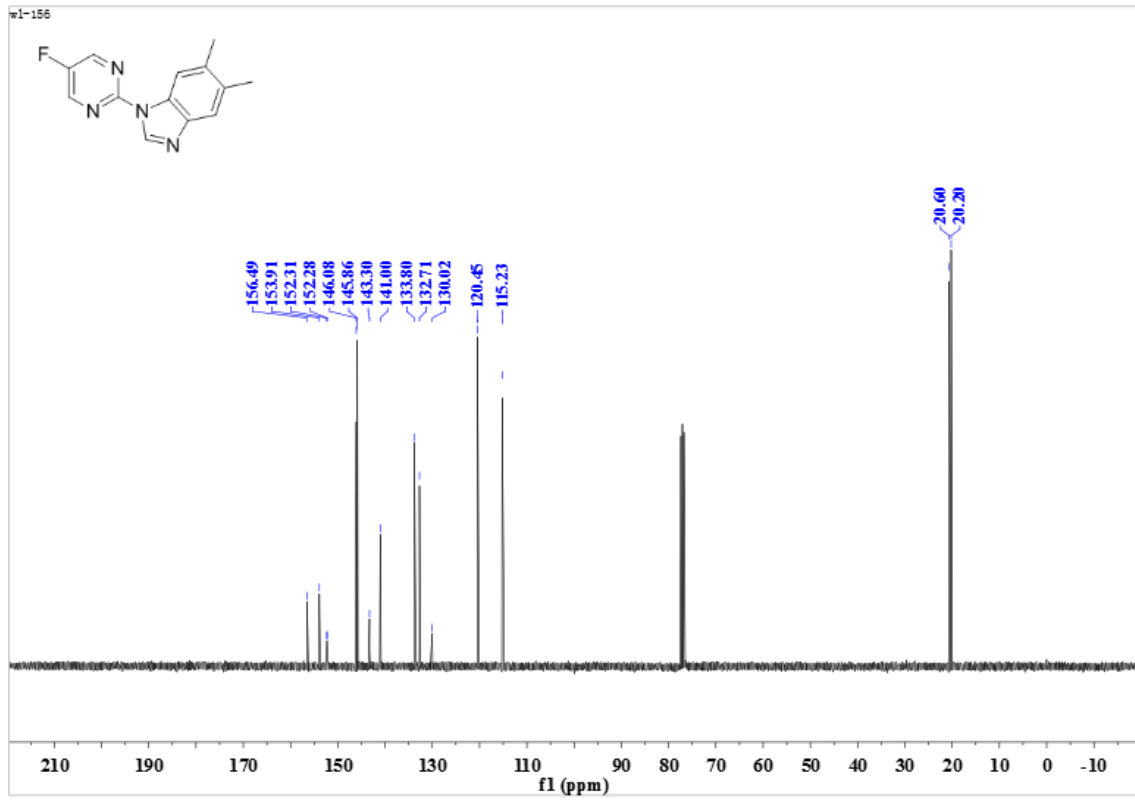

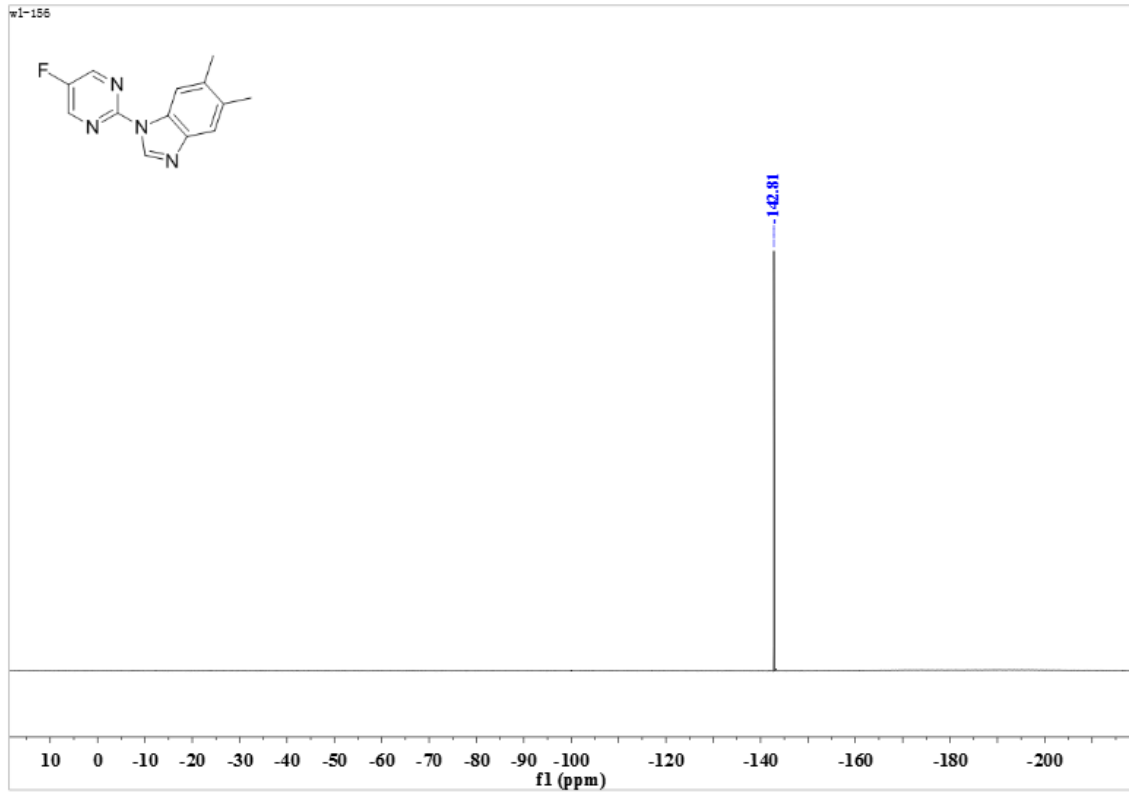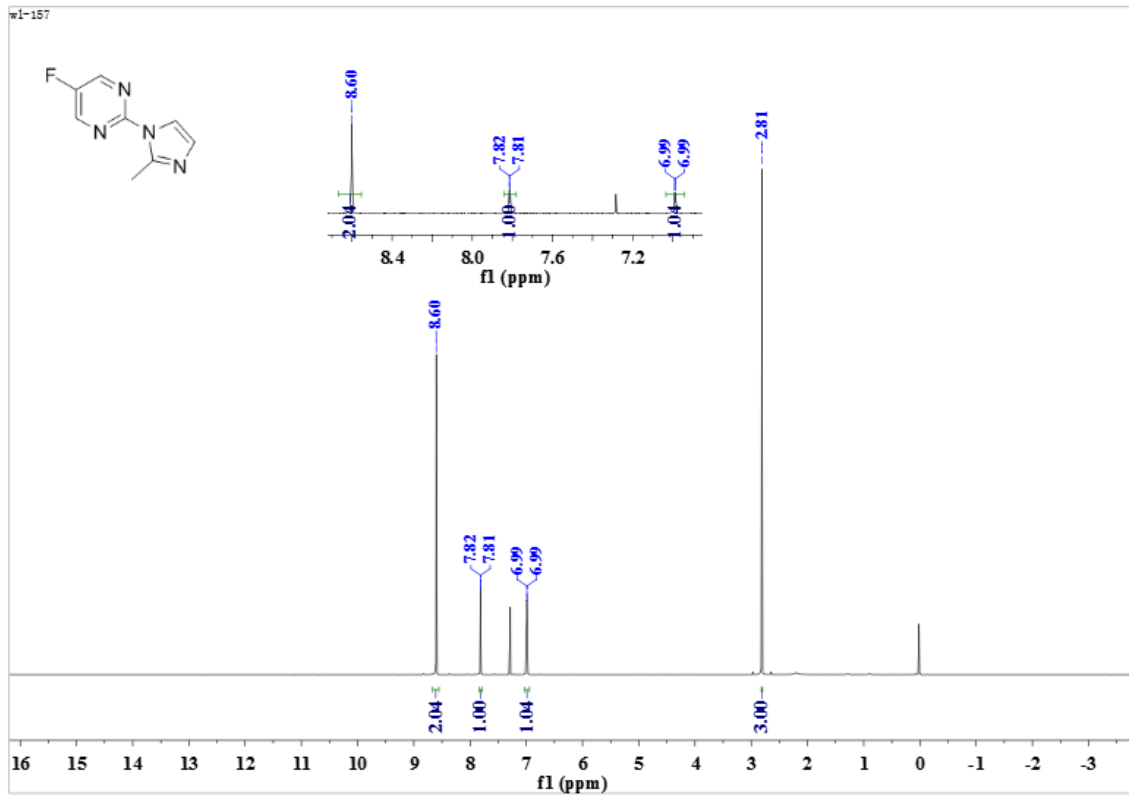

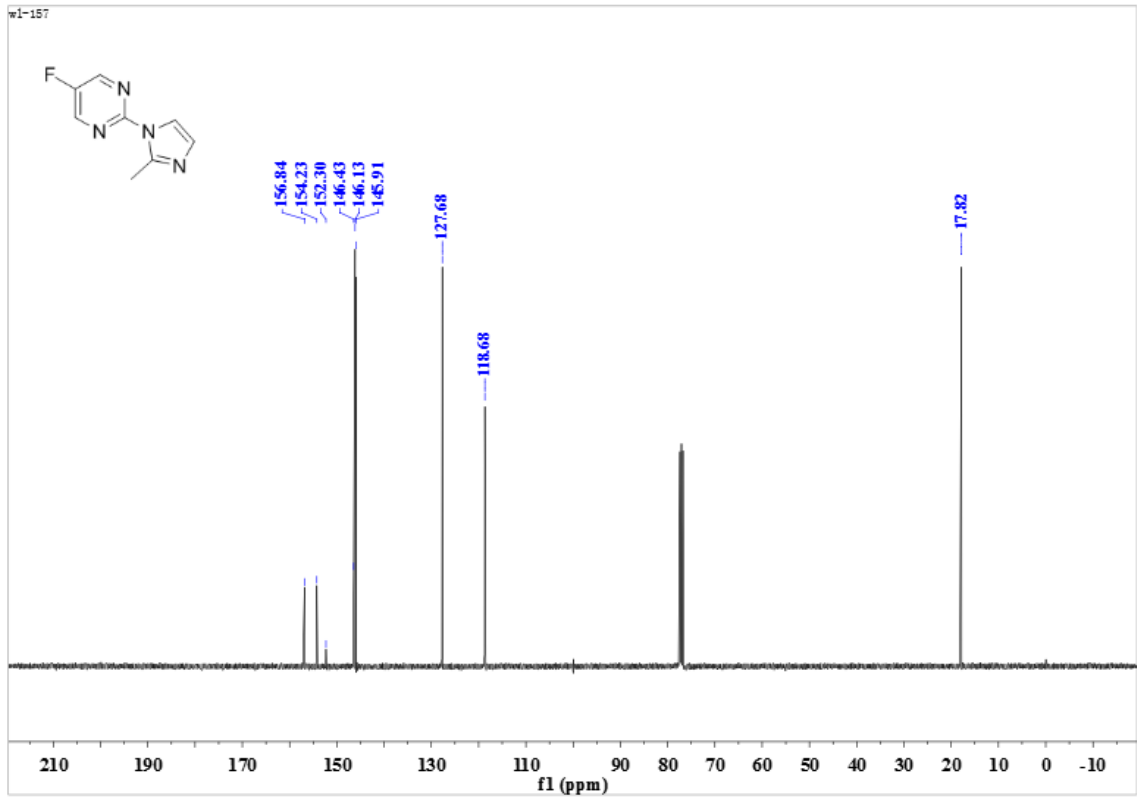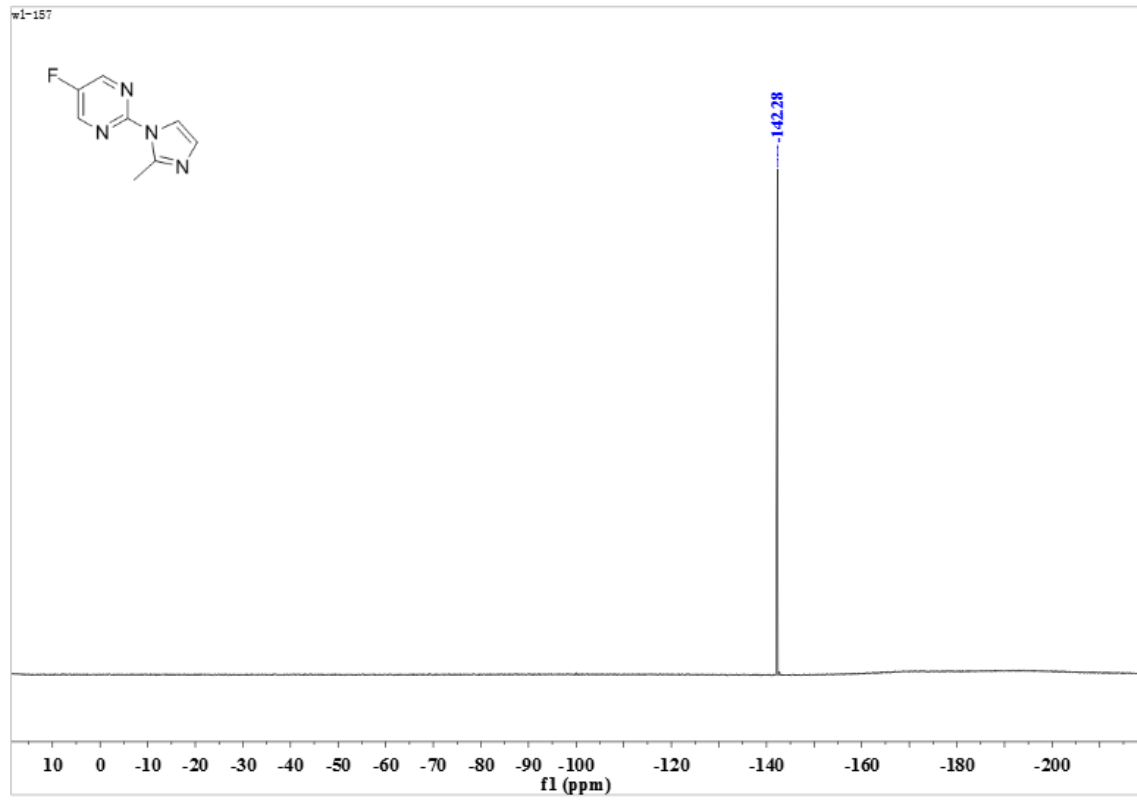

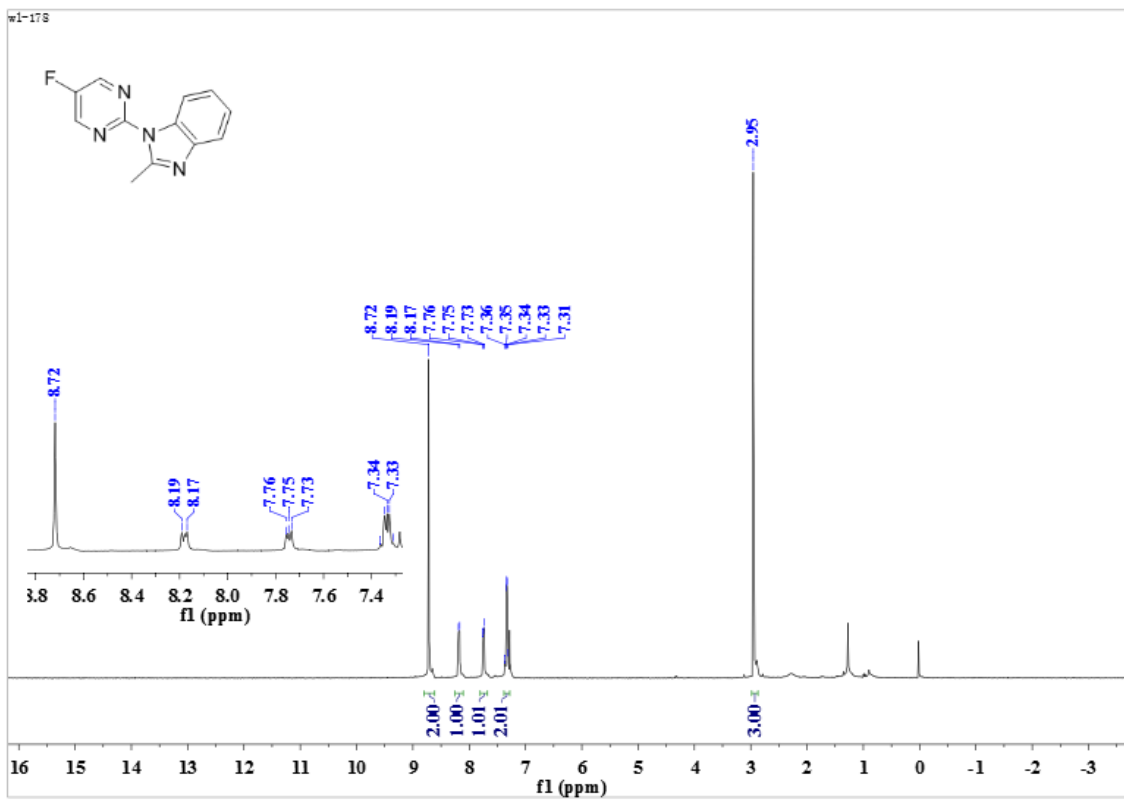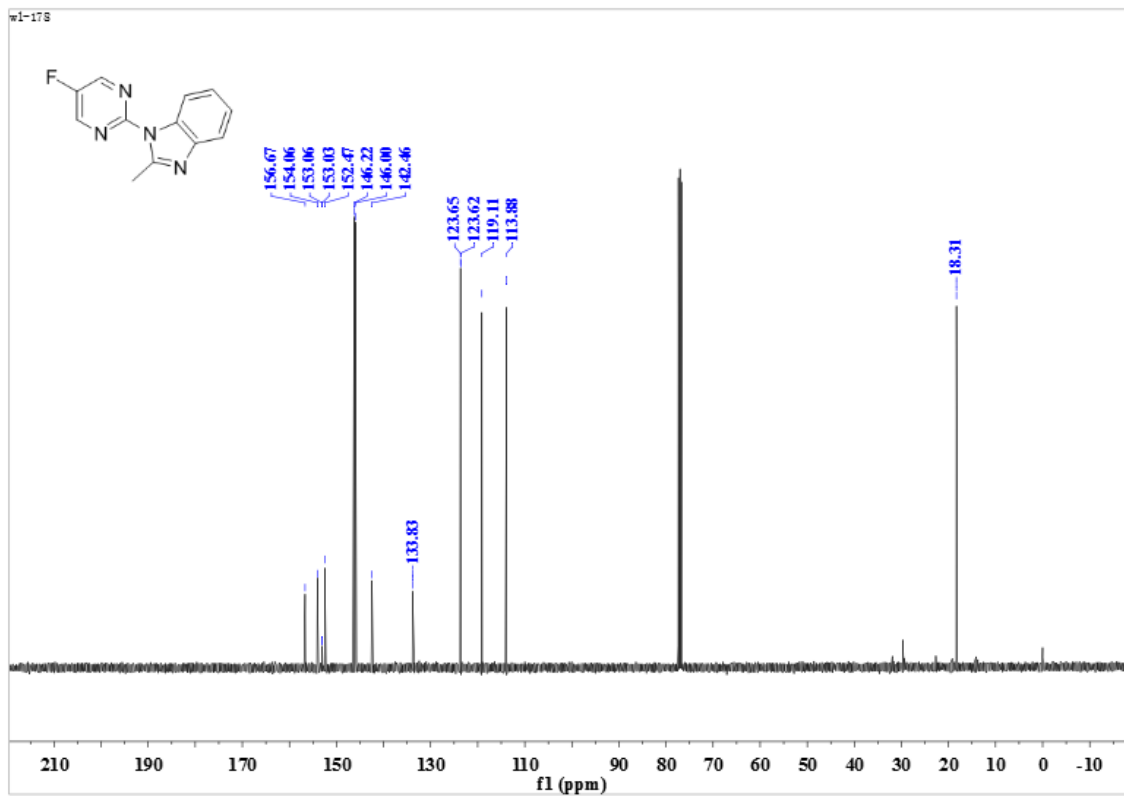

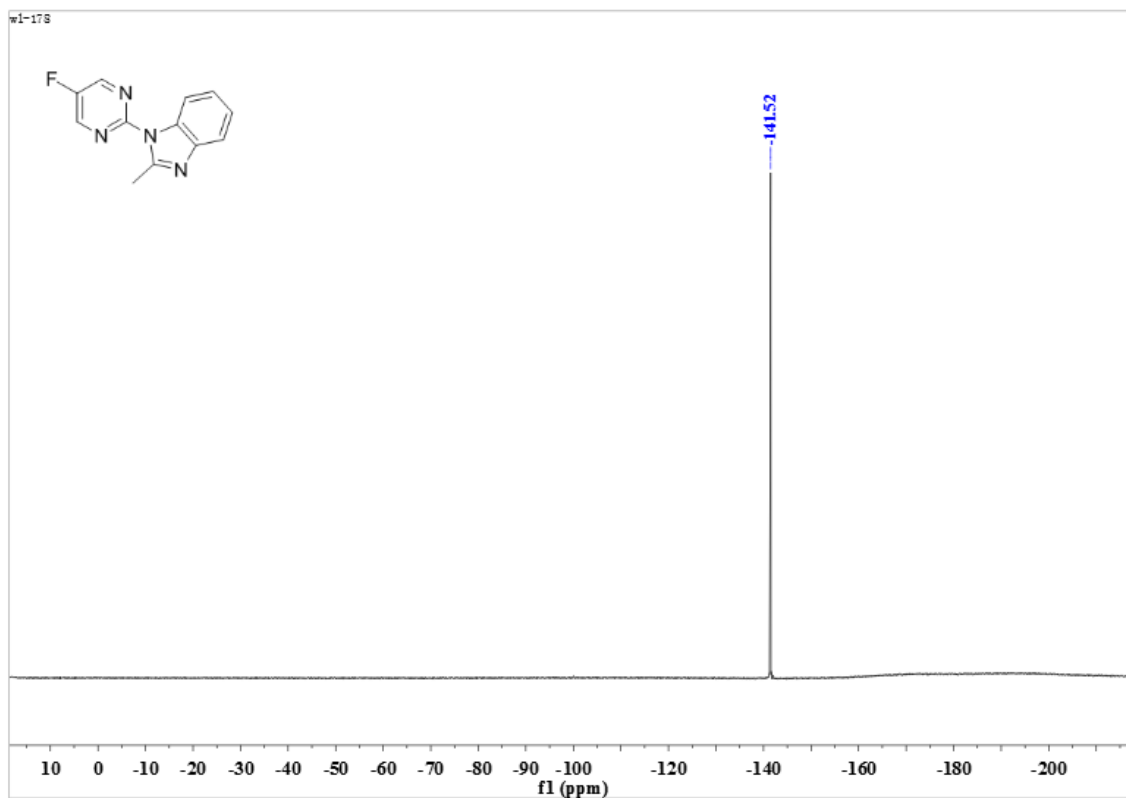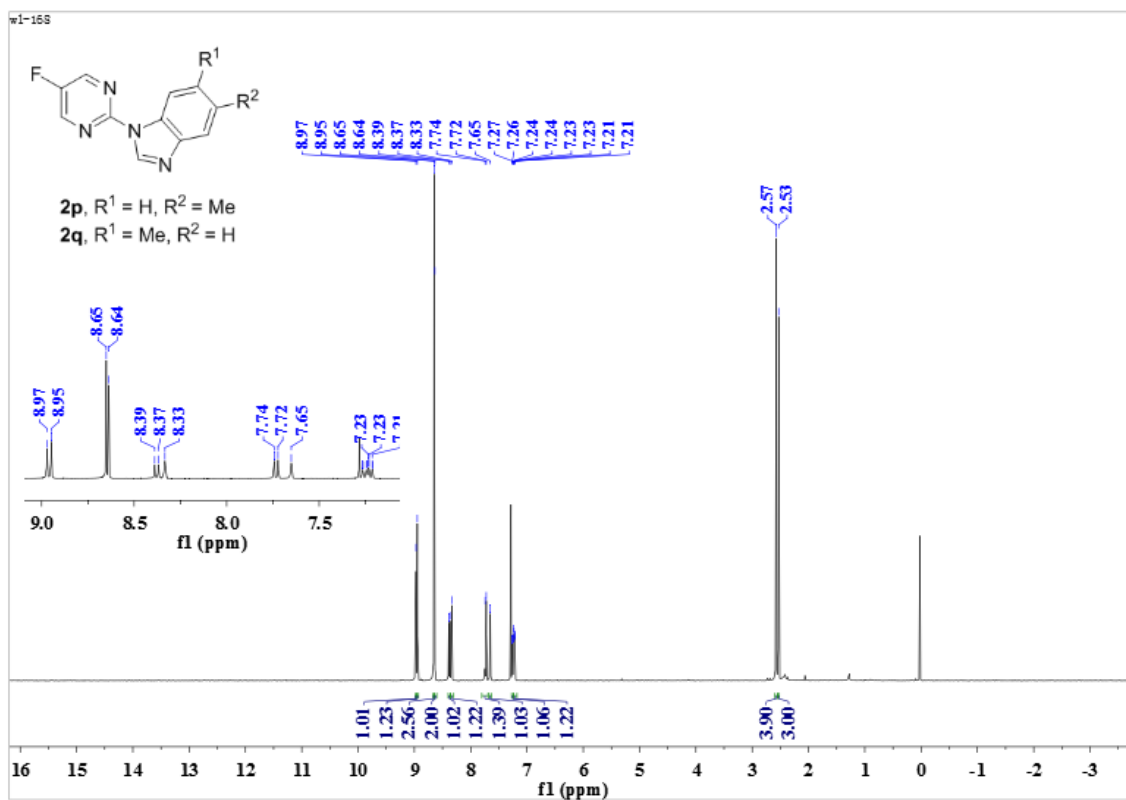

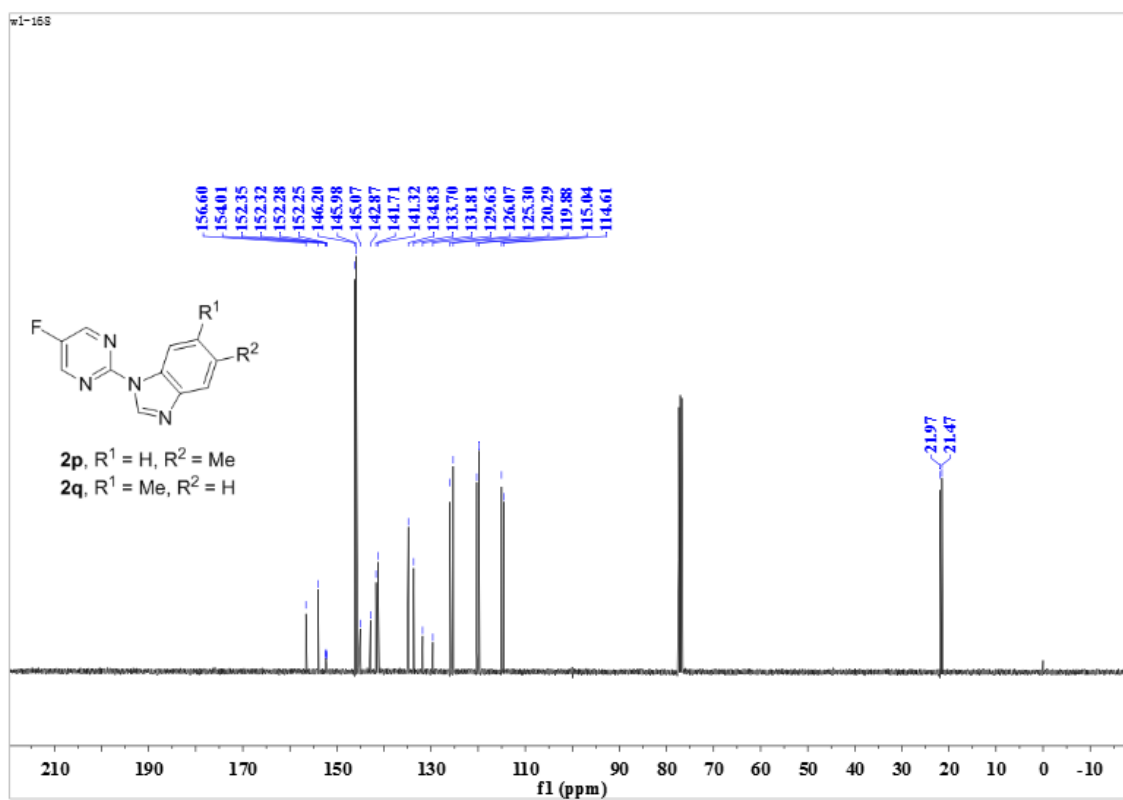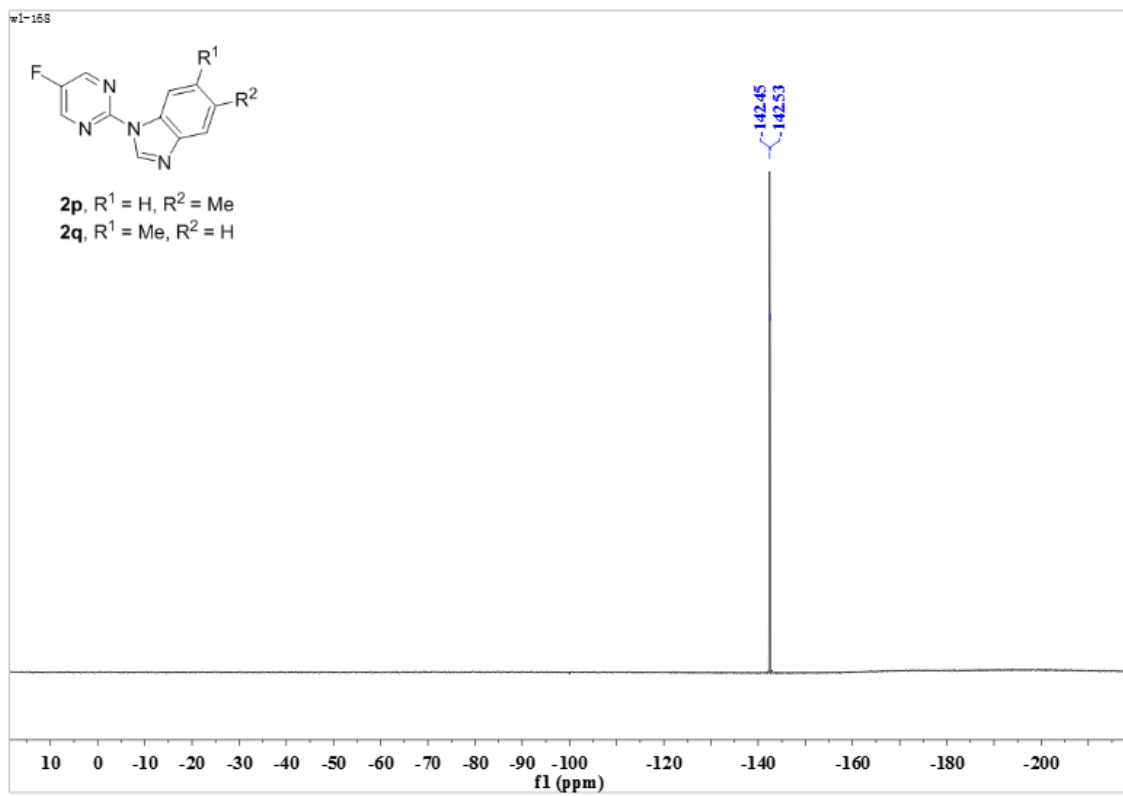

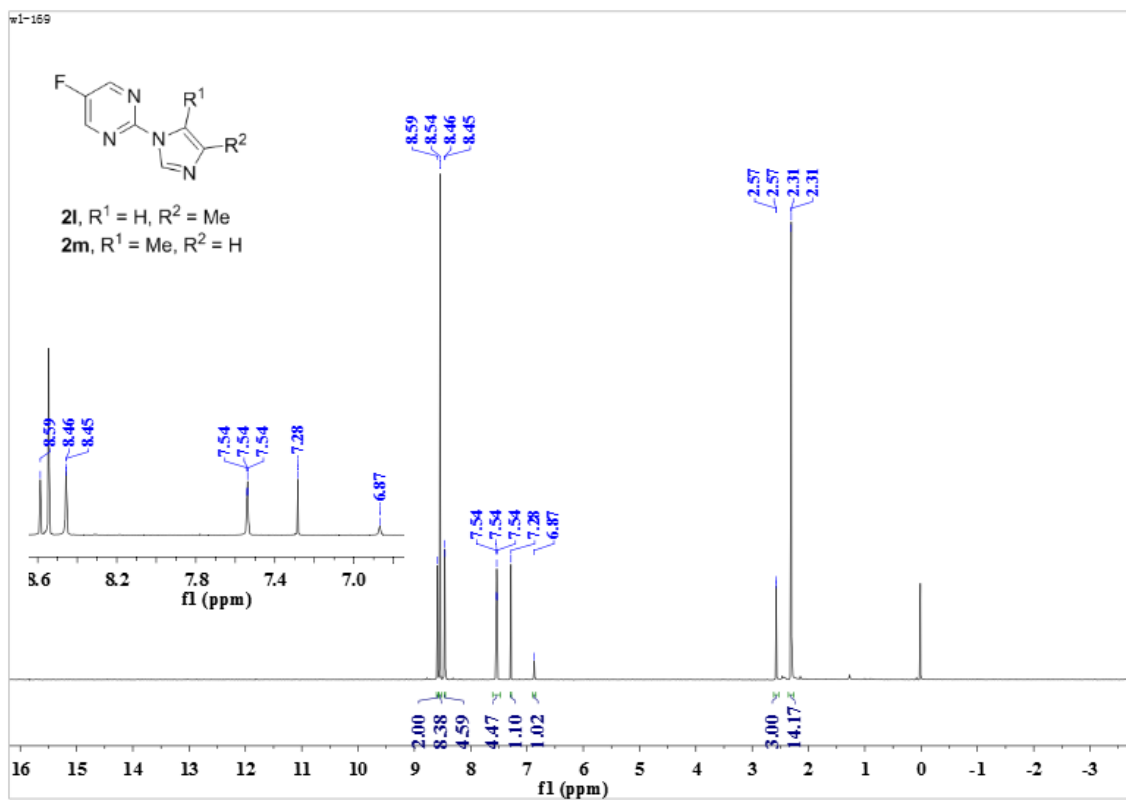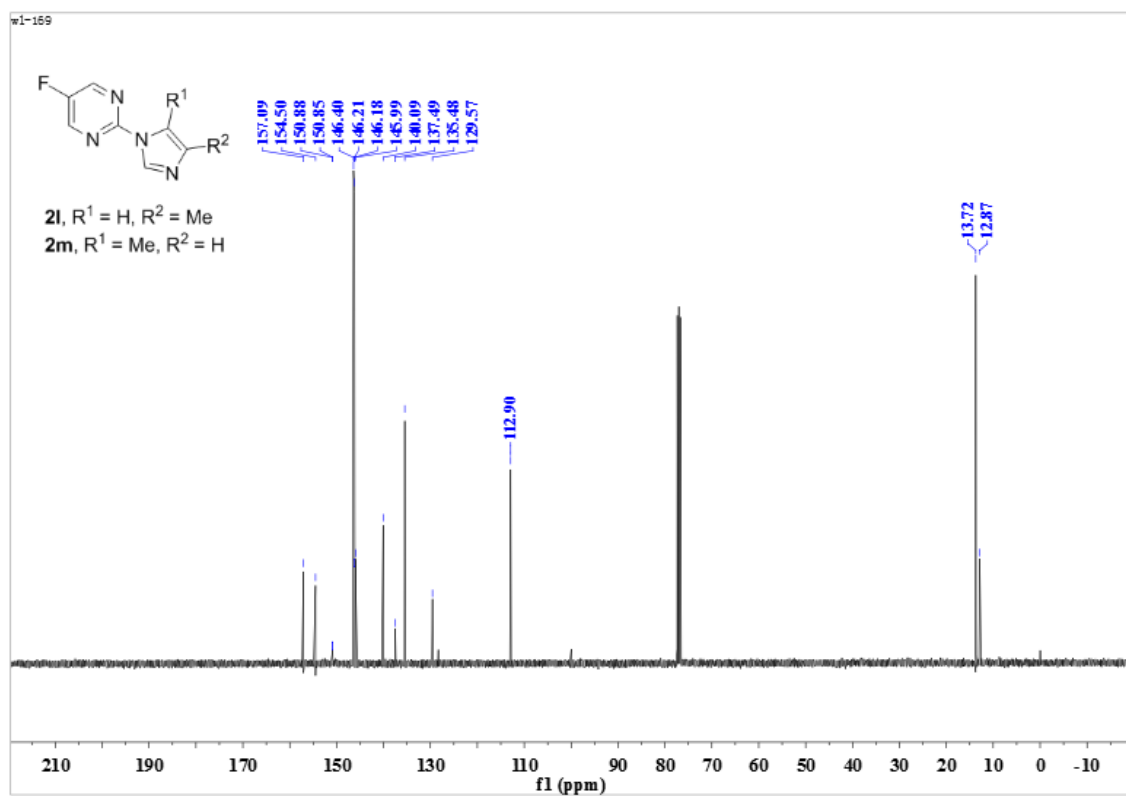



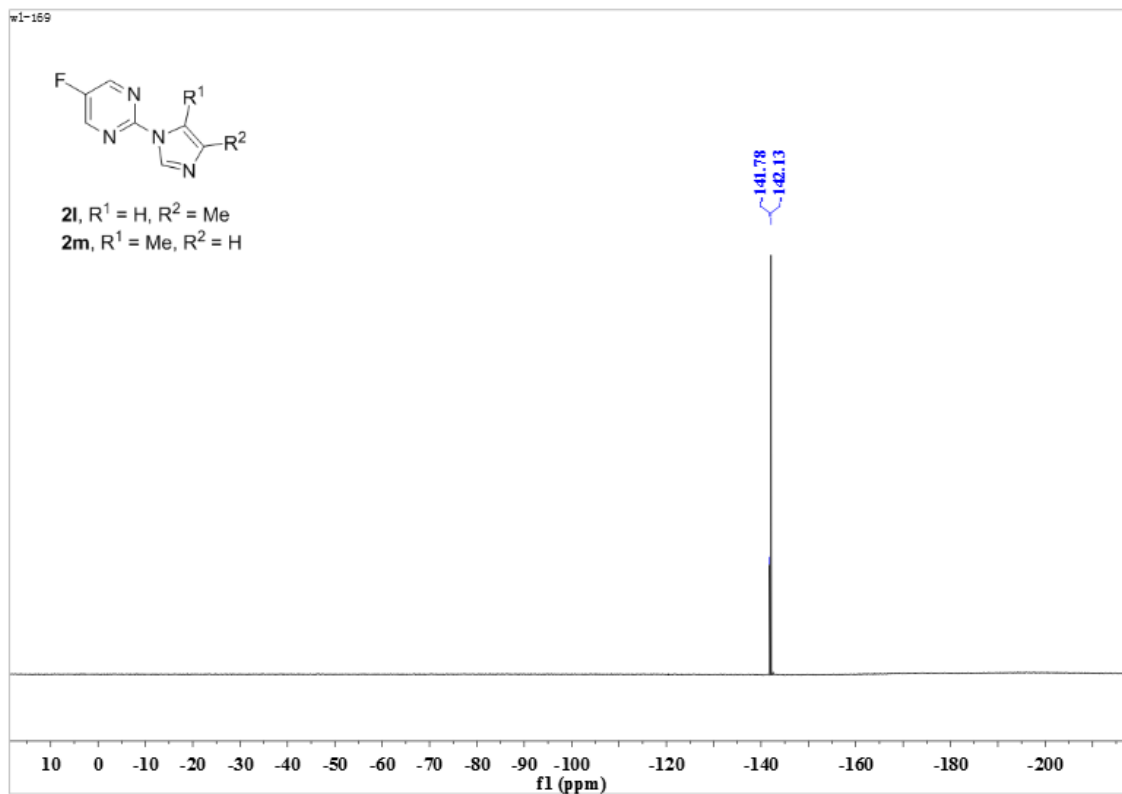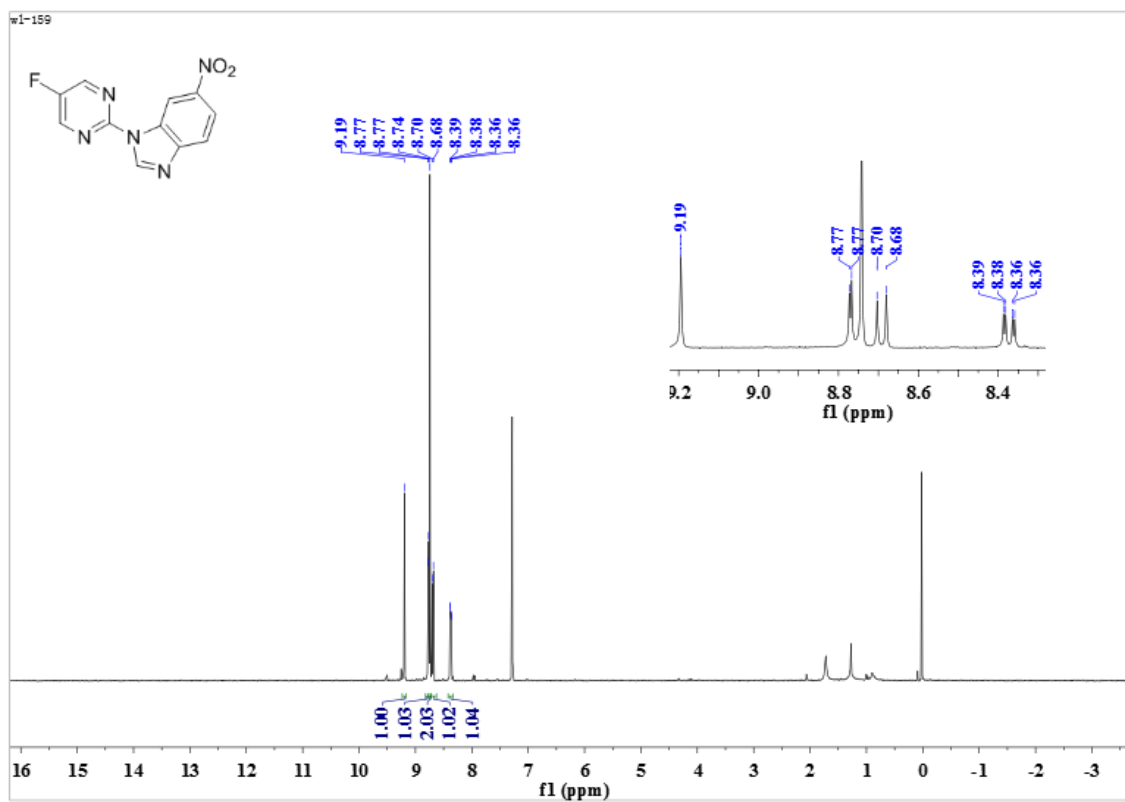

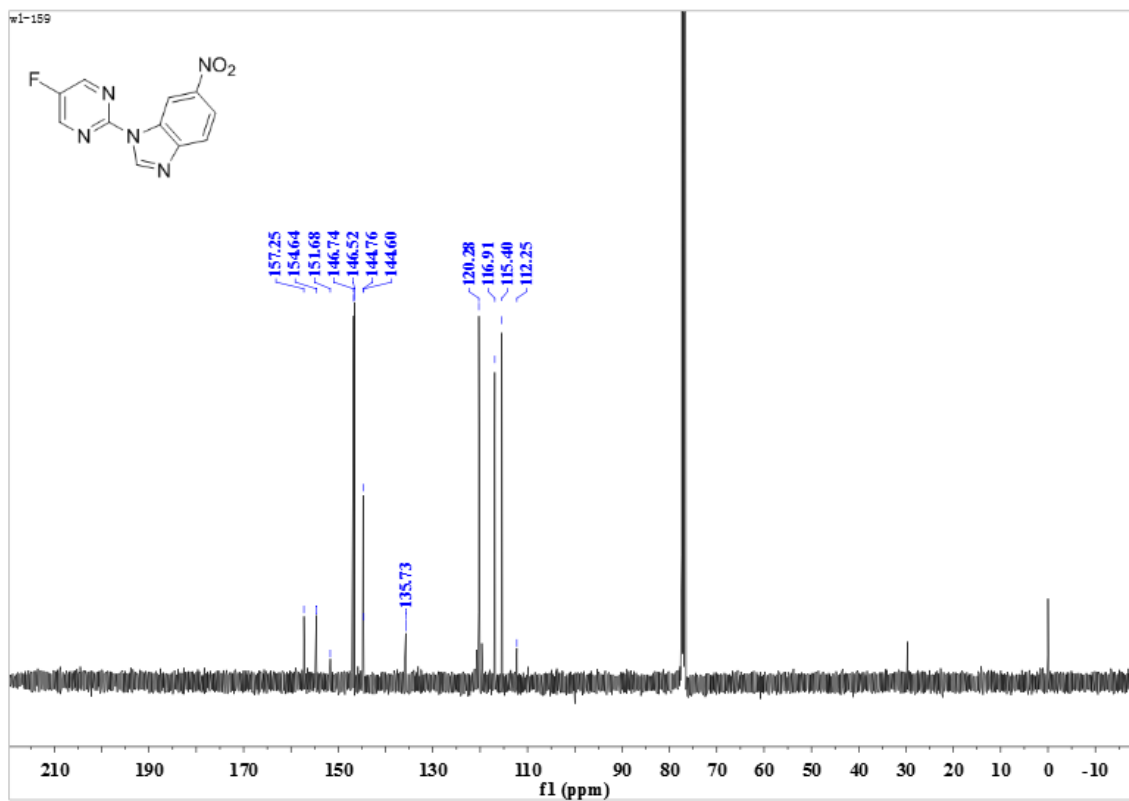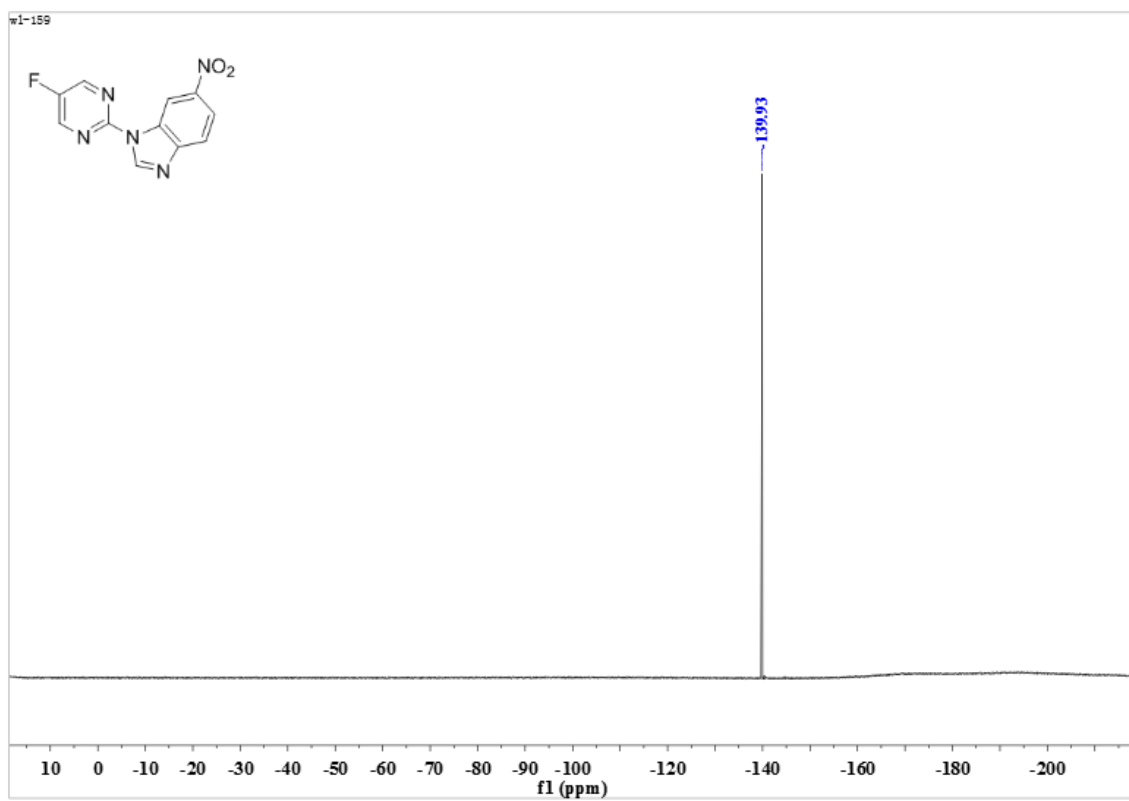

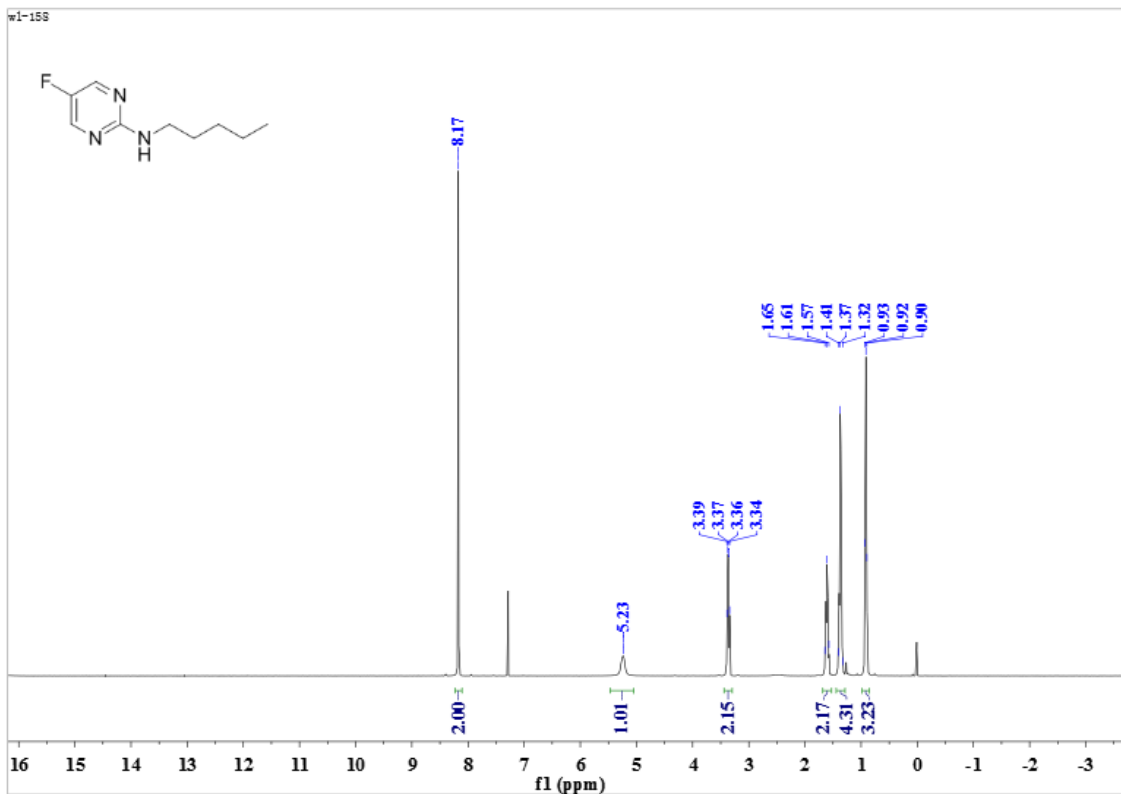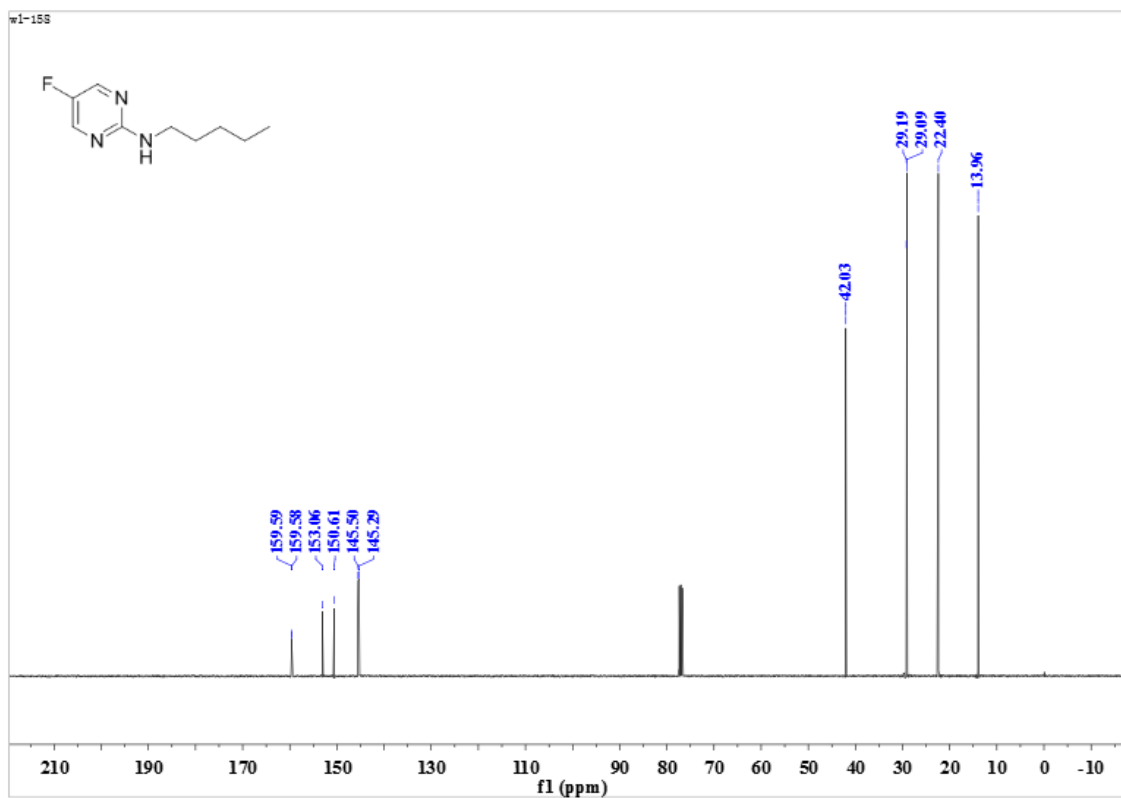

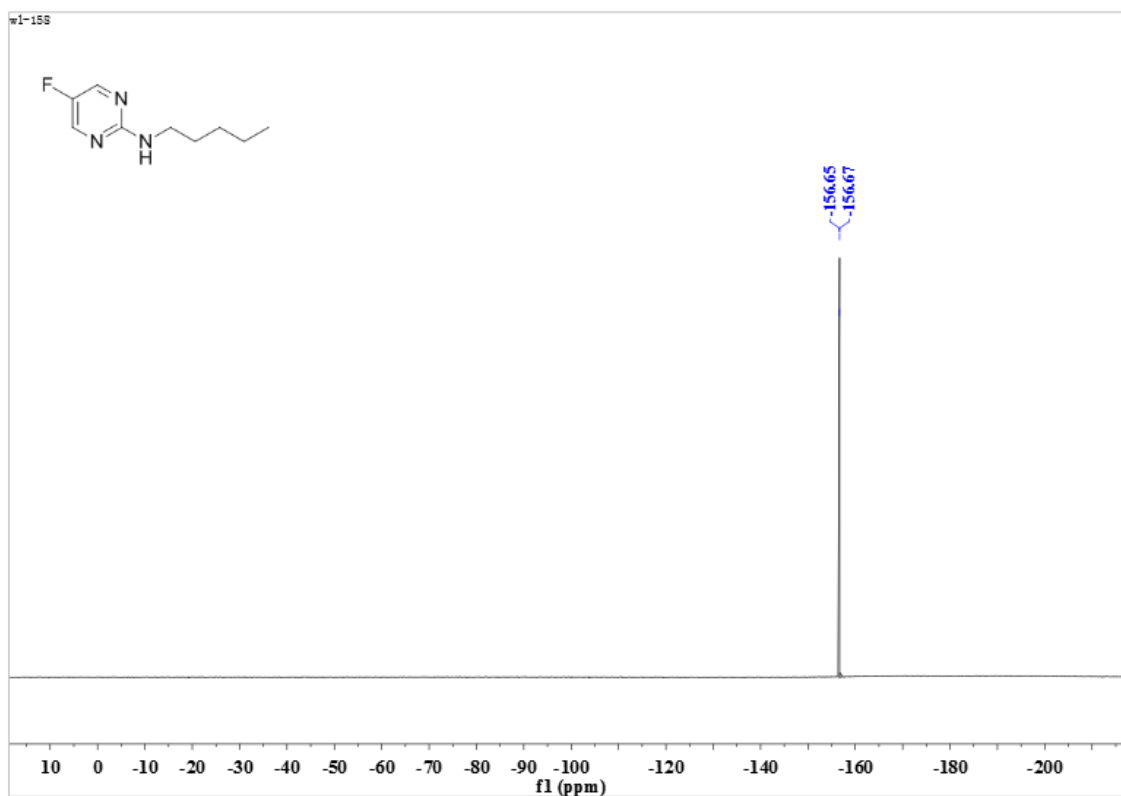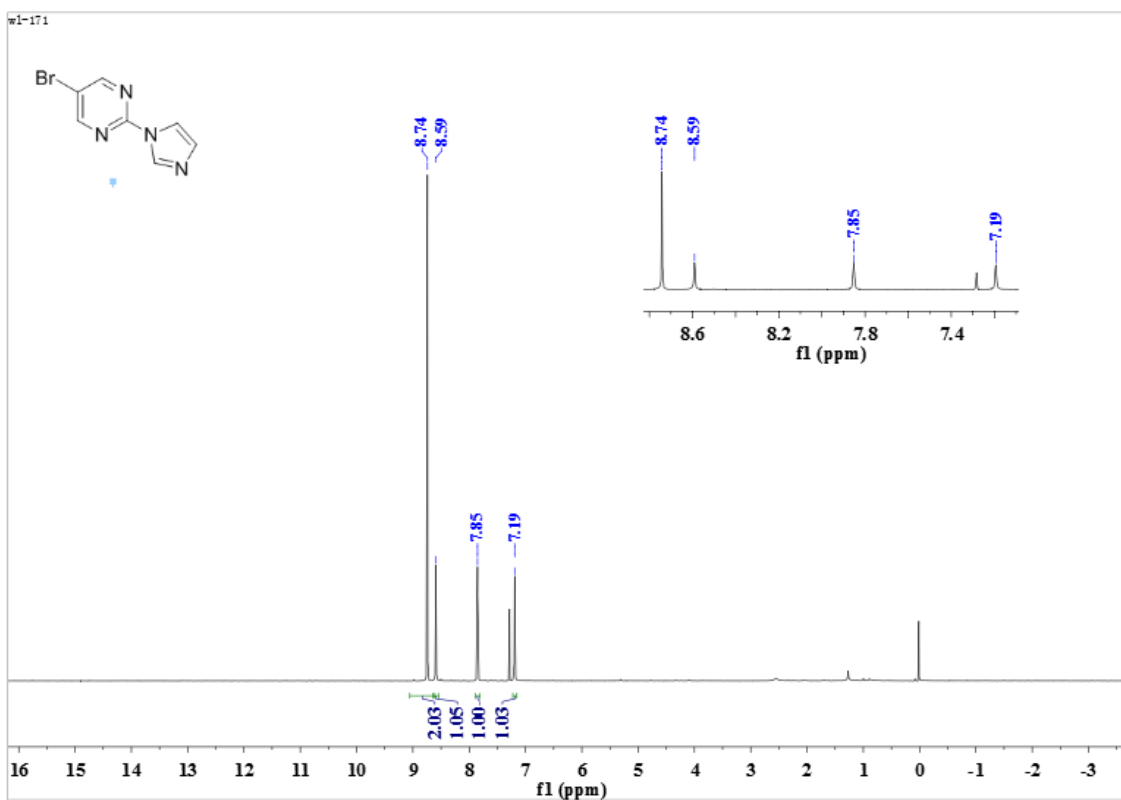

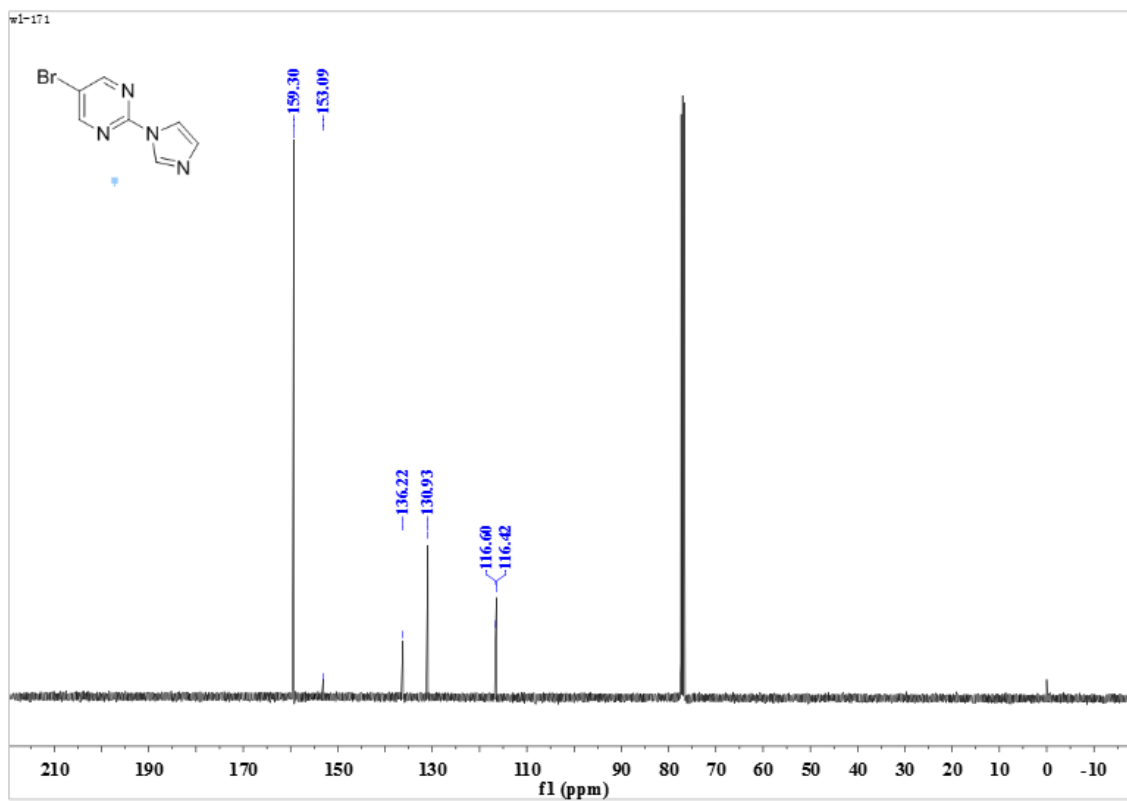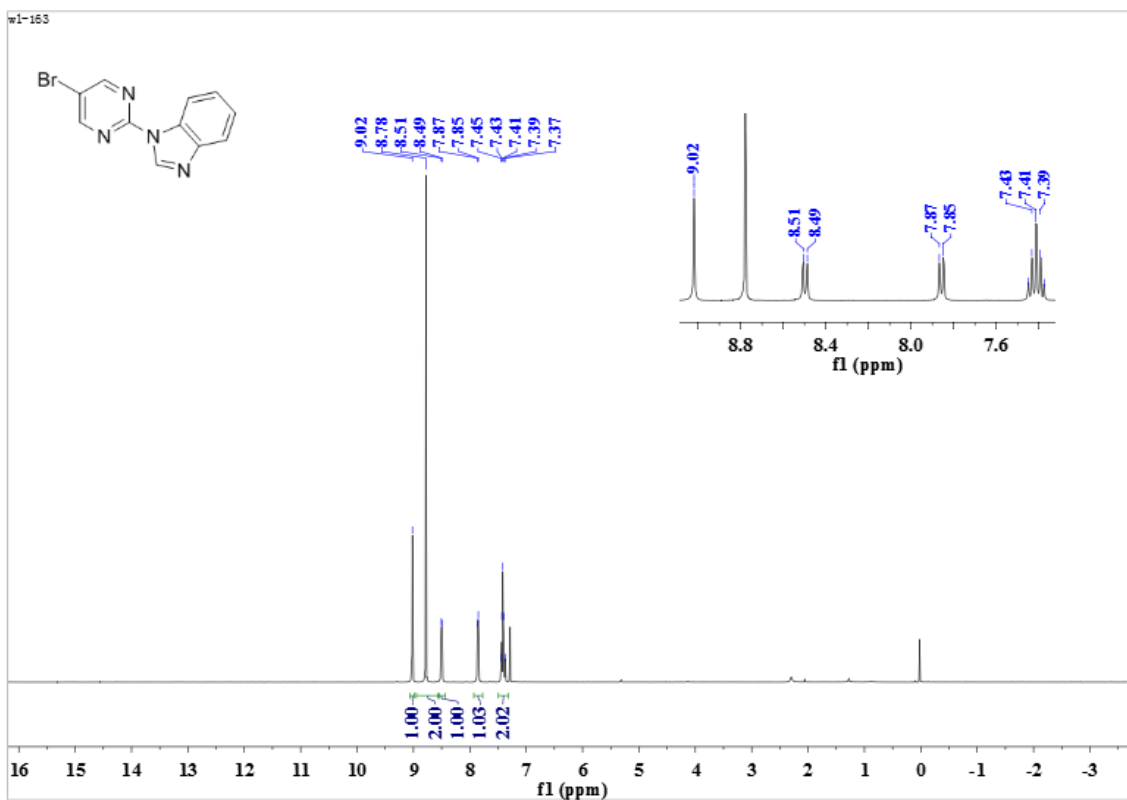

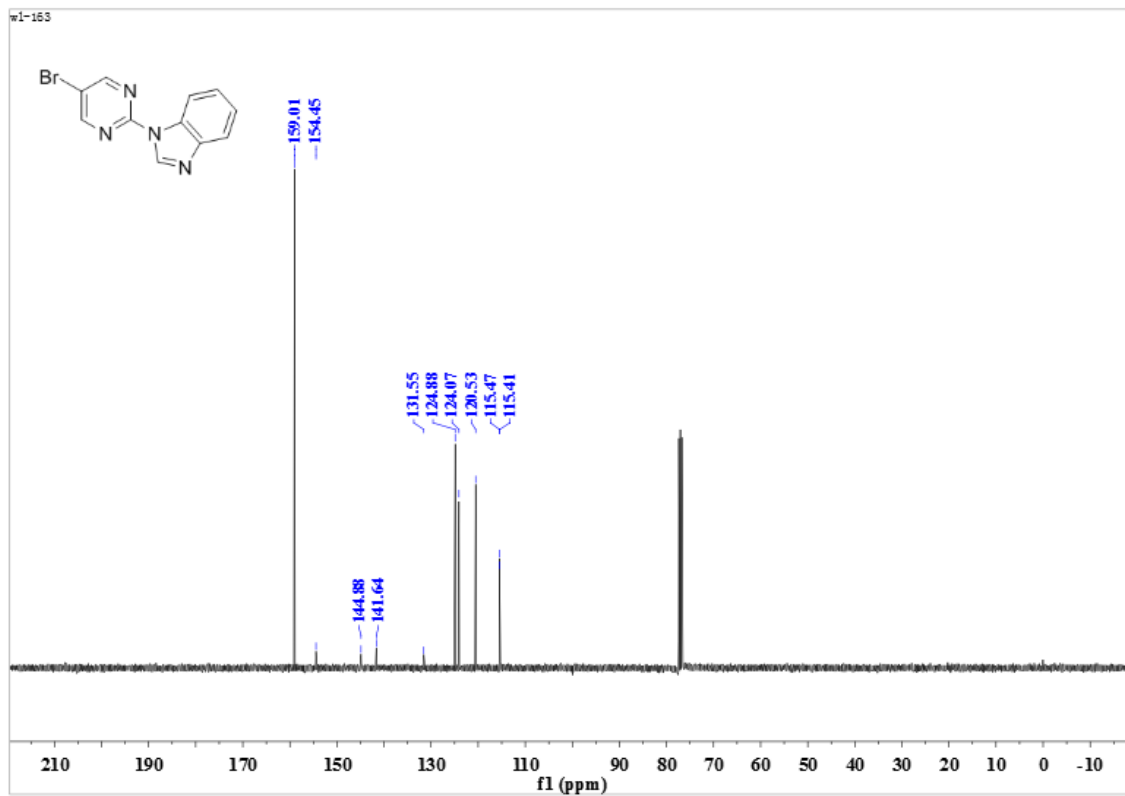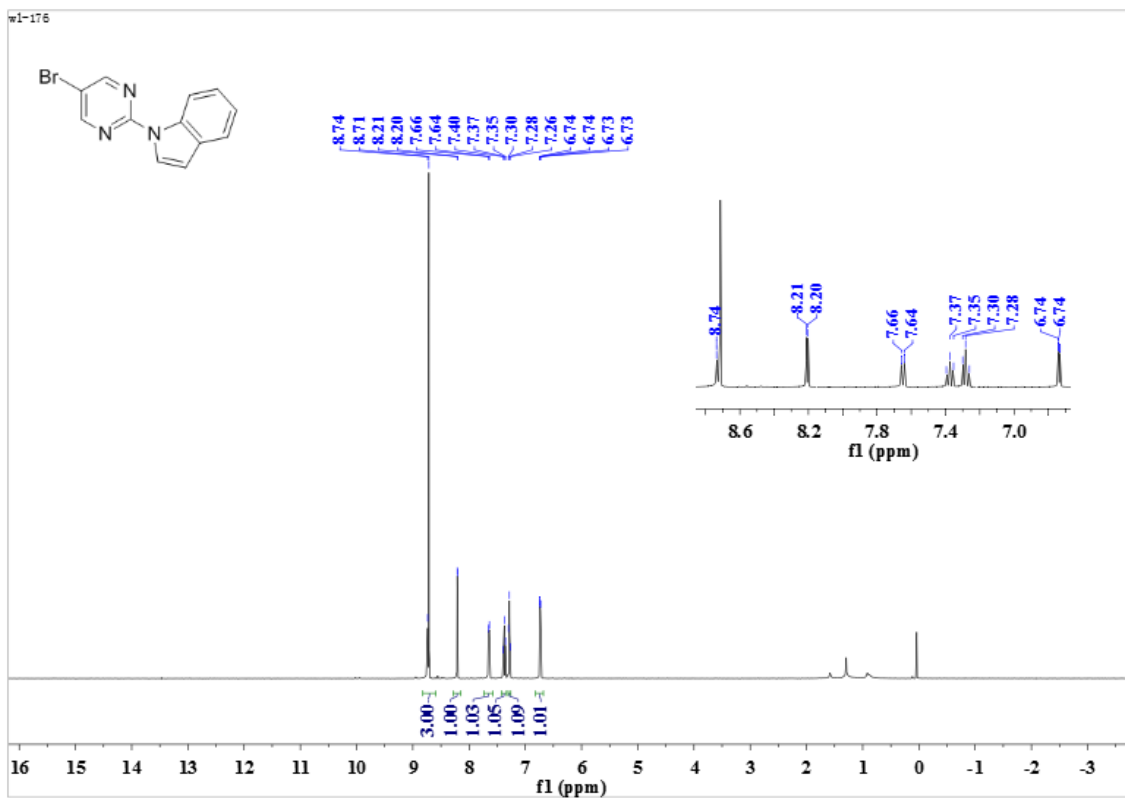

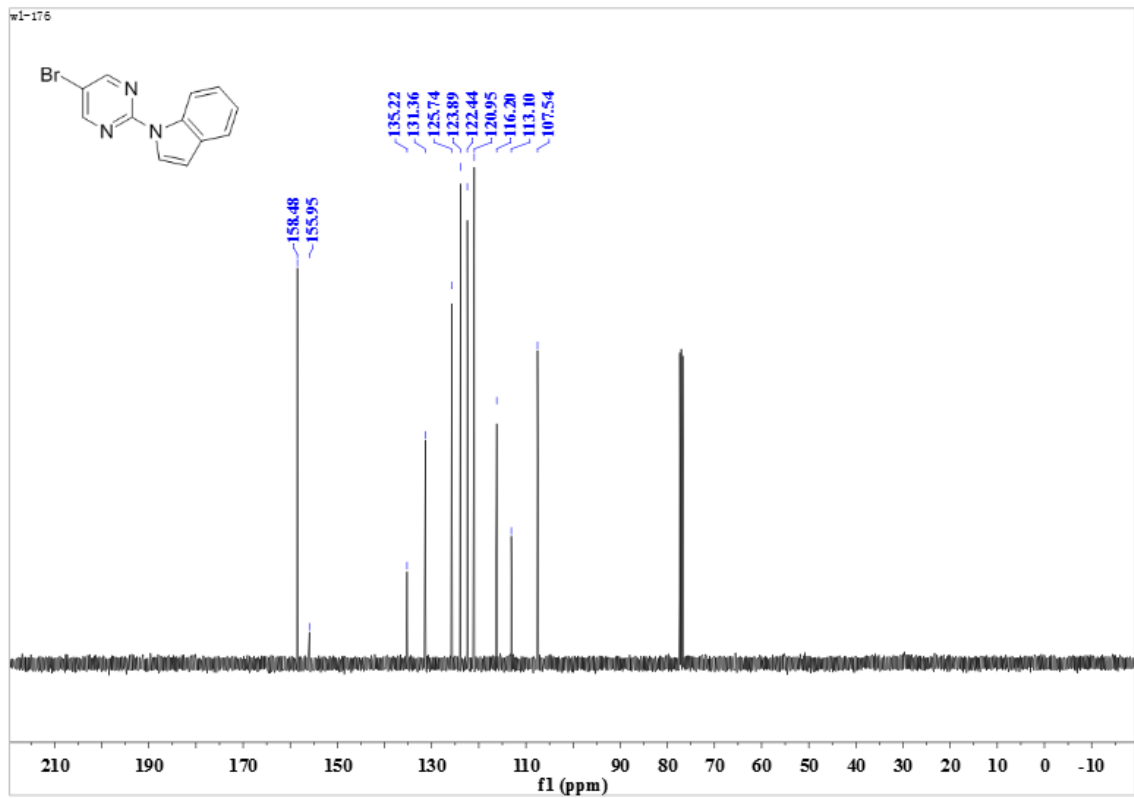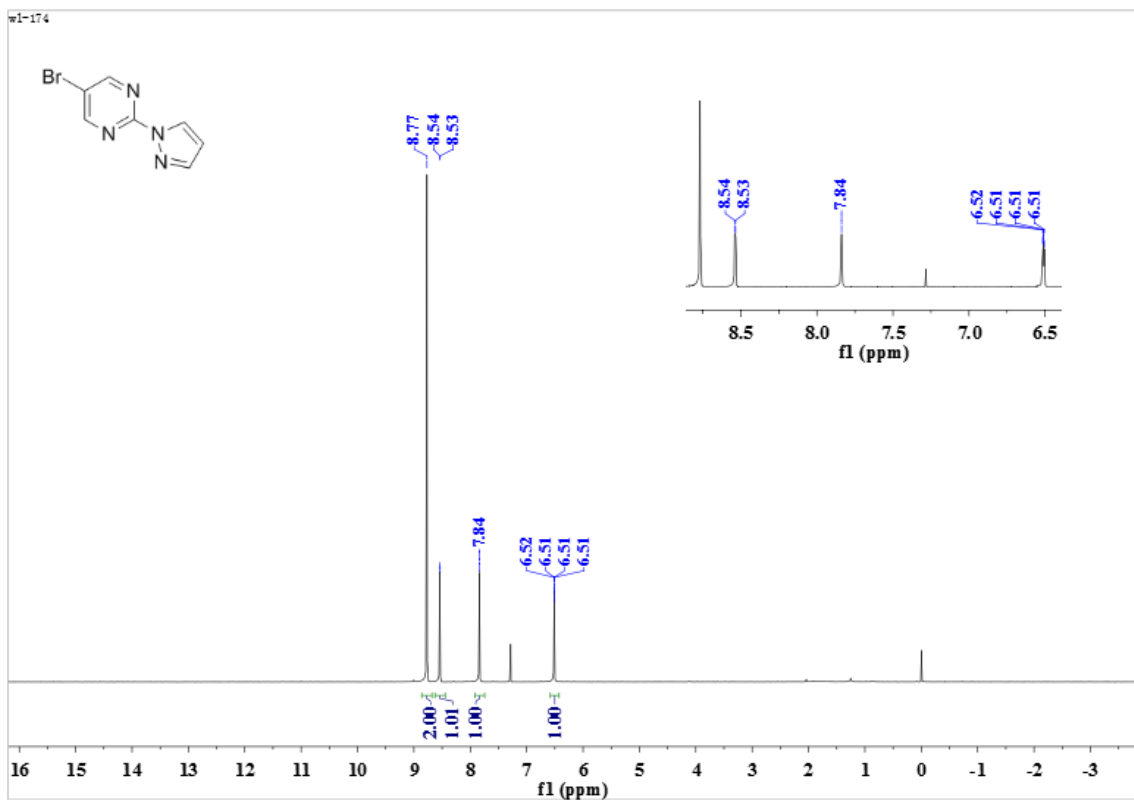

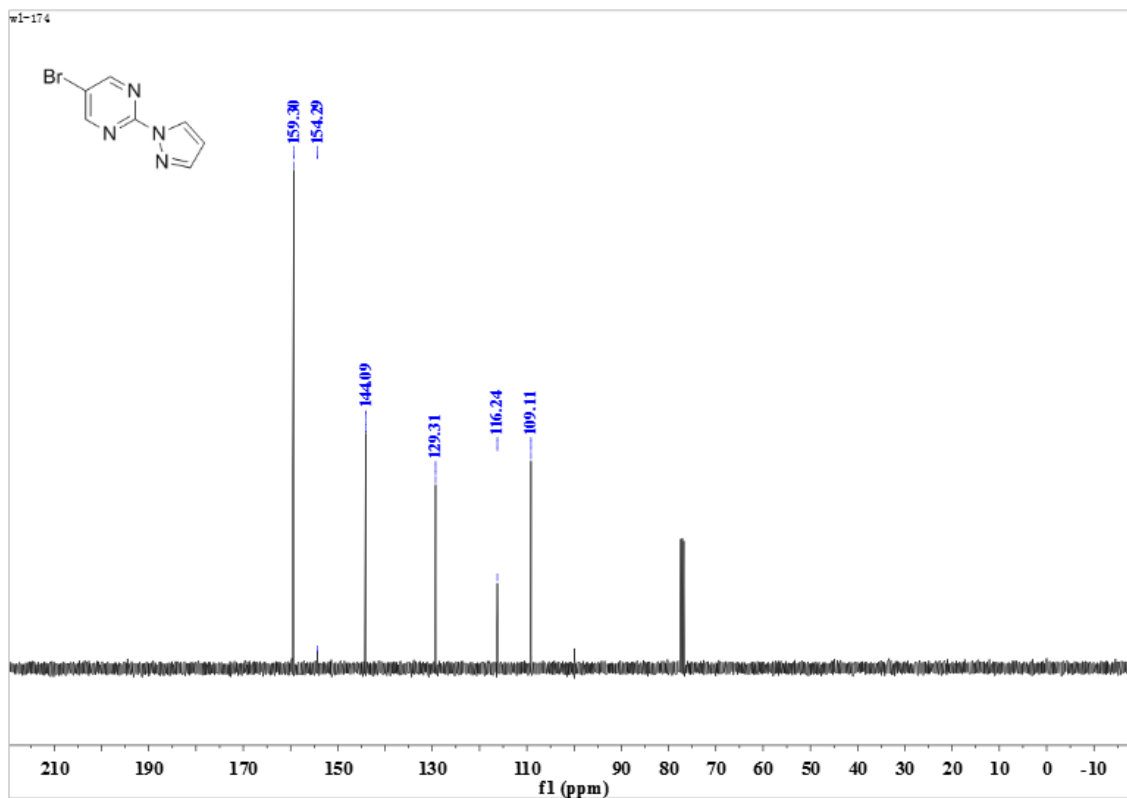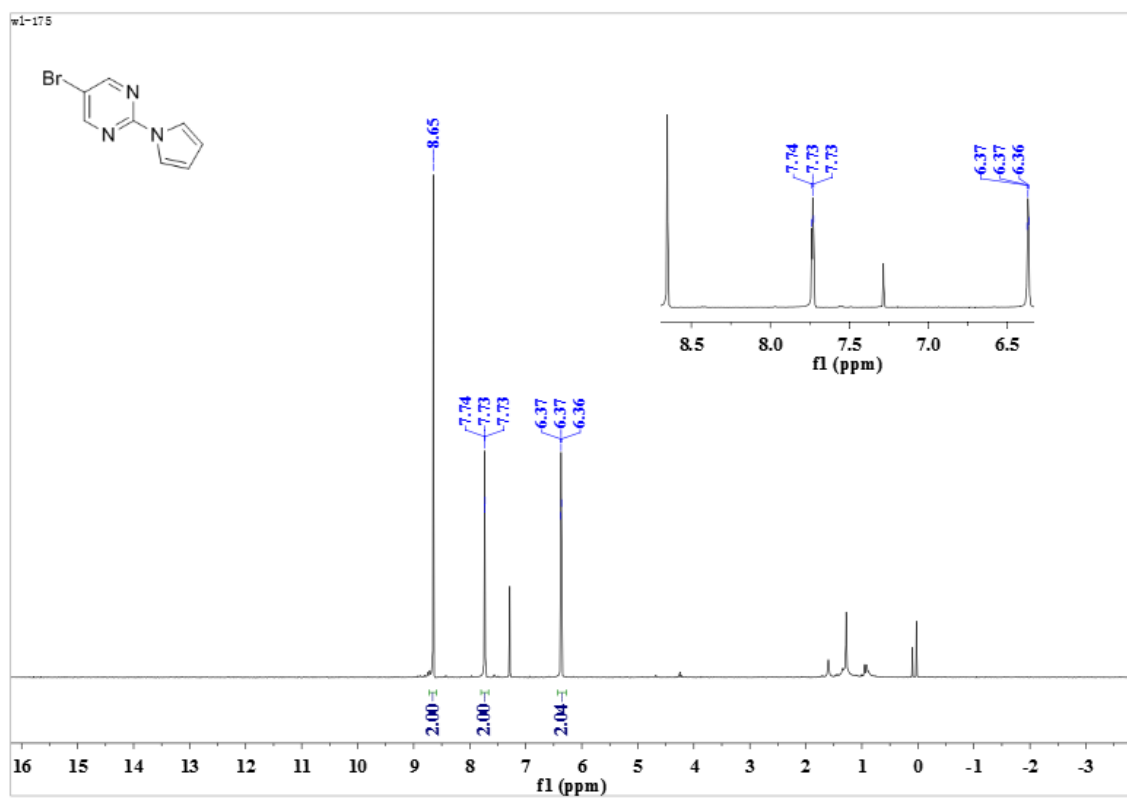



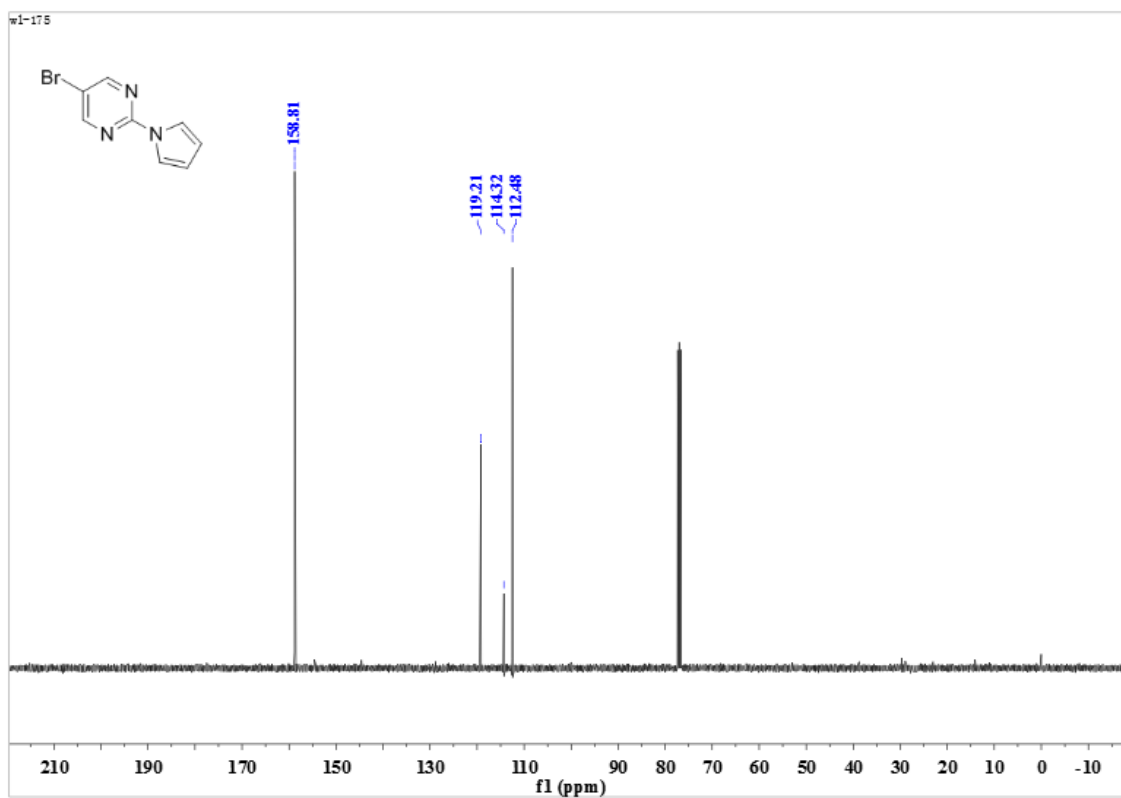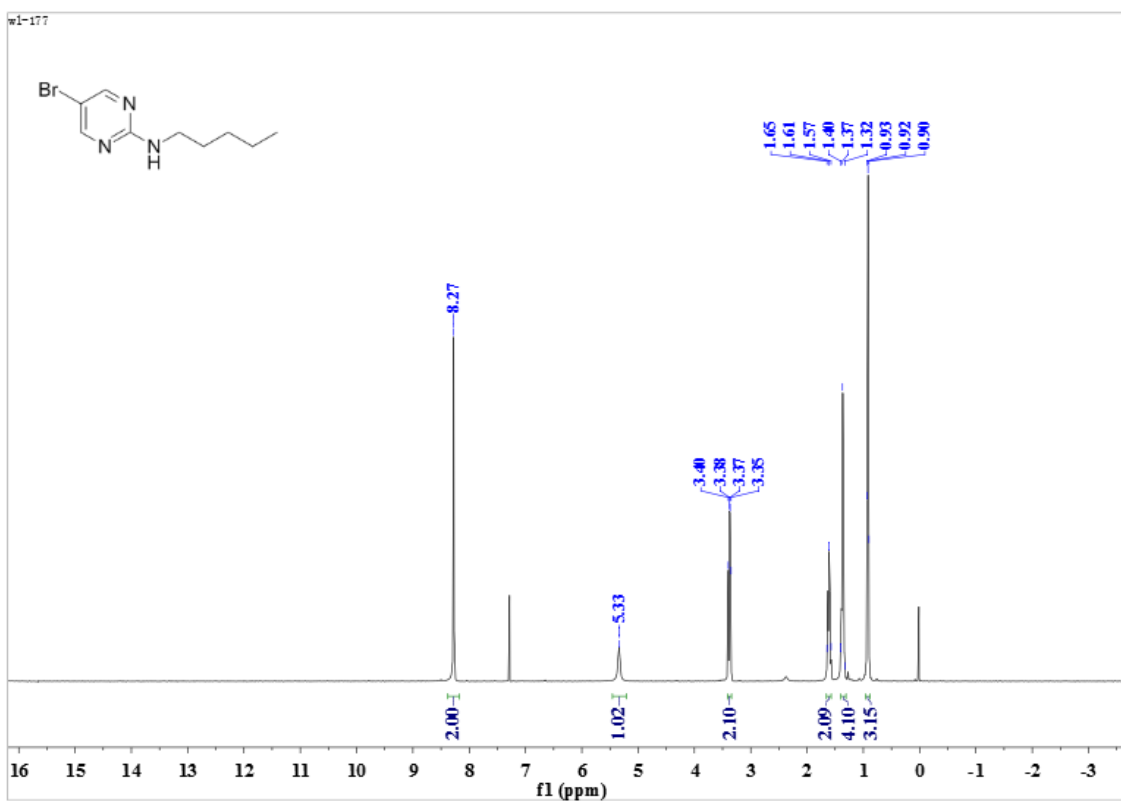

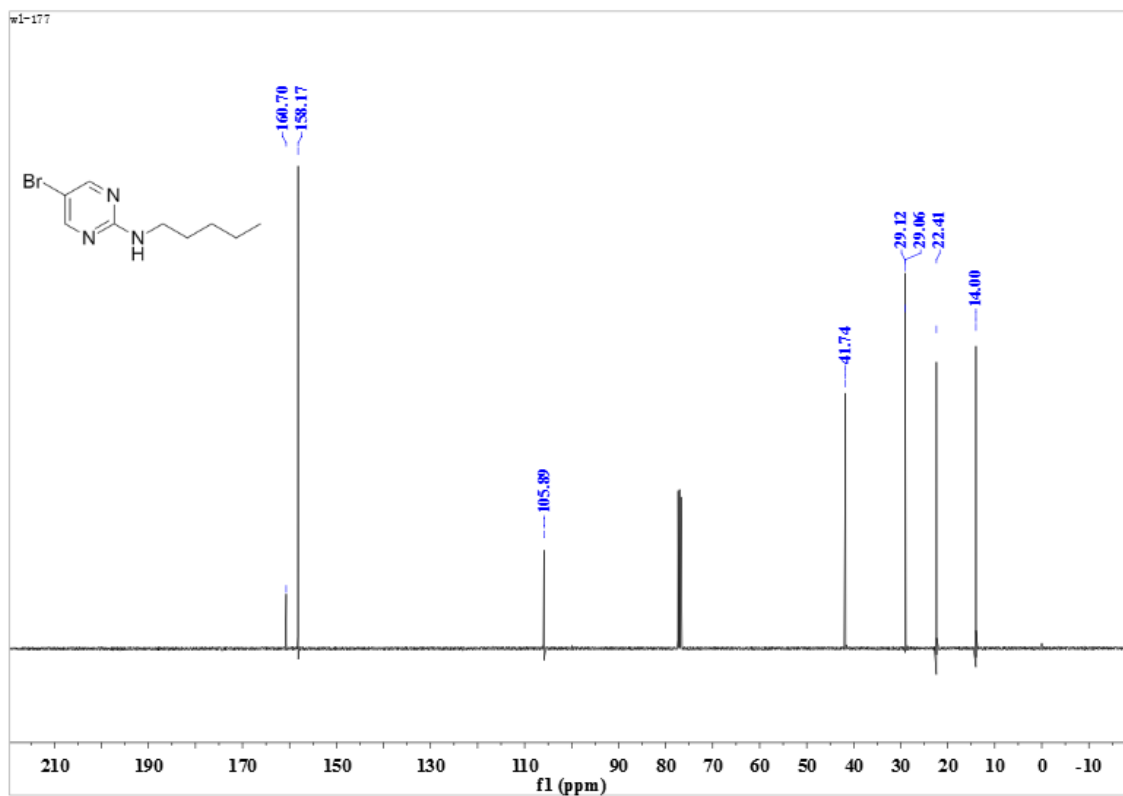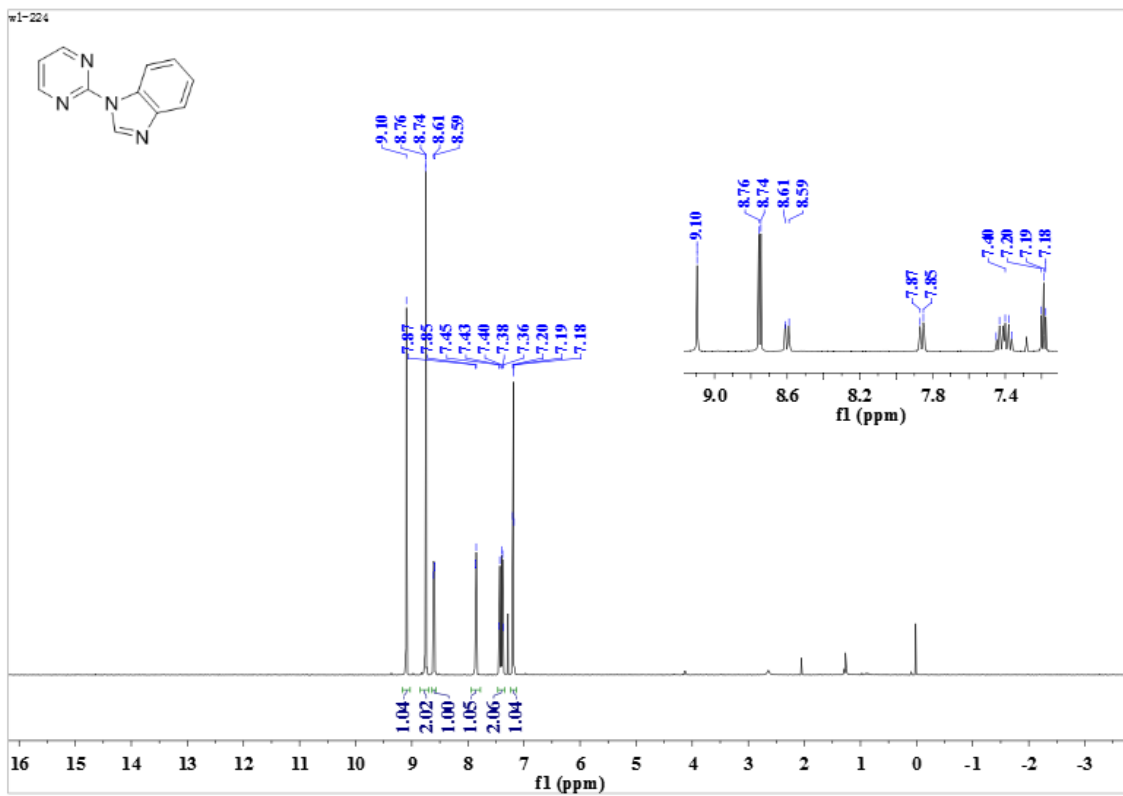

氢谱  
 xinjiang daxue varian inova-400 IH-4N  
 ljunin-LN-1-shihezhidaxue in CDCl3

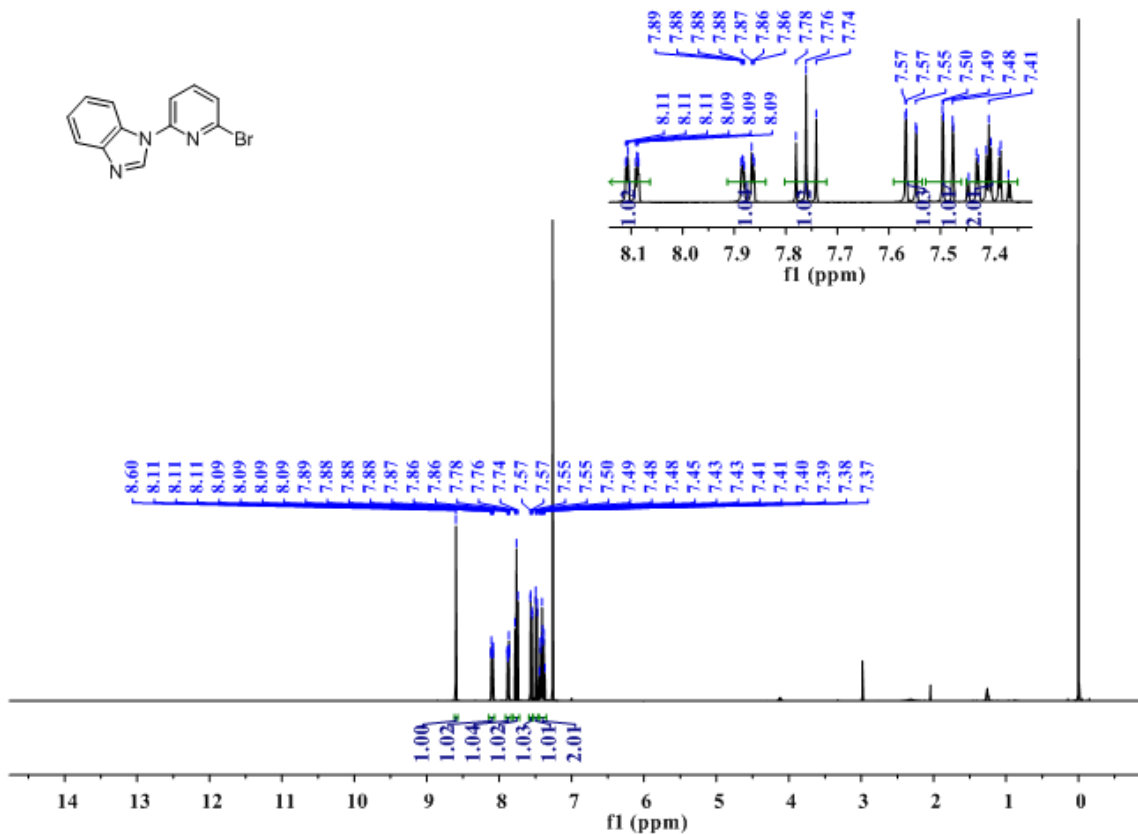

碳谱  
 xinjiang daxue varian inova-400 13C-4N  
 ljunin-LN-1-shihezhidaxue in CDCl3

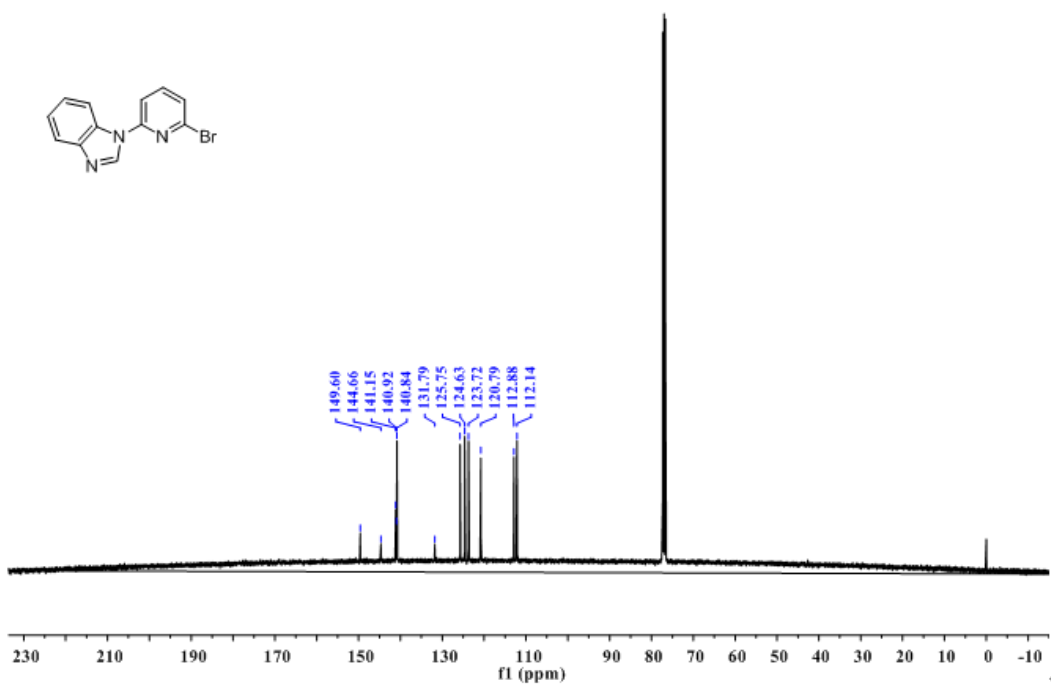

H1-4N-CDCl3-20130801-liuning-LX-2-shihezhidaxue  
xinjiang daxue varian inova-400 1H-4N  
liuning-2-shihezhidaxue  
in CDCl3

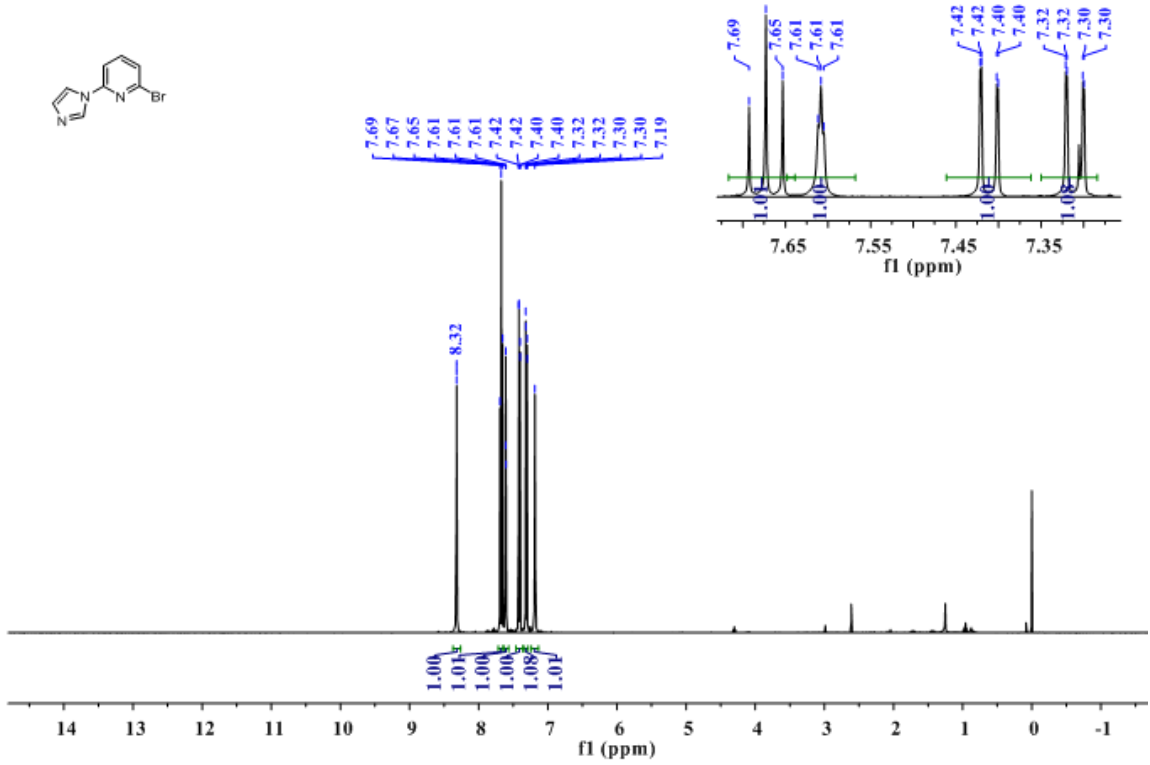

CARBON\_01  
XTIQC VARIAN MR-400  
maxiaowei\_LX\_2\_C13 CDCl3

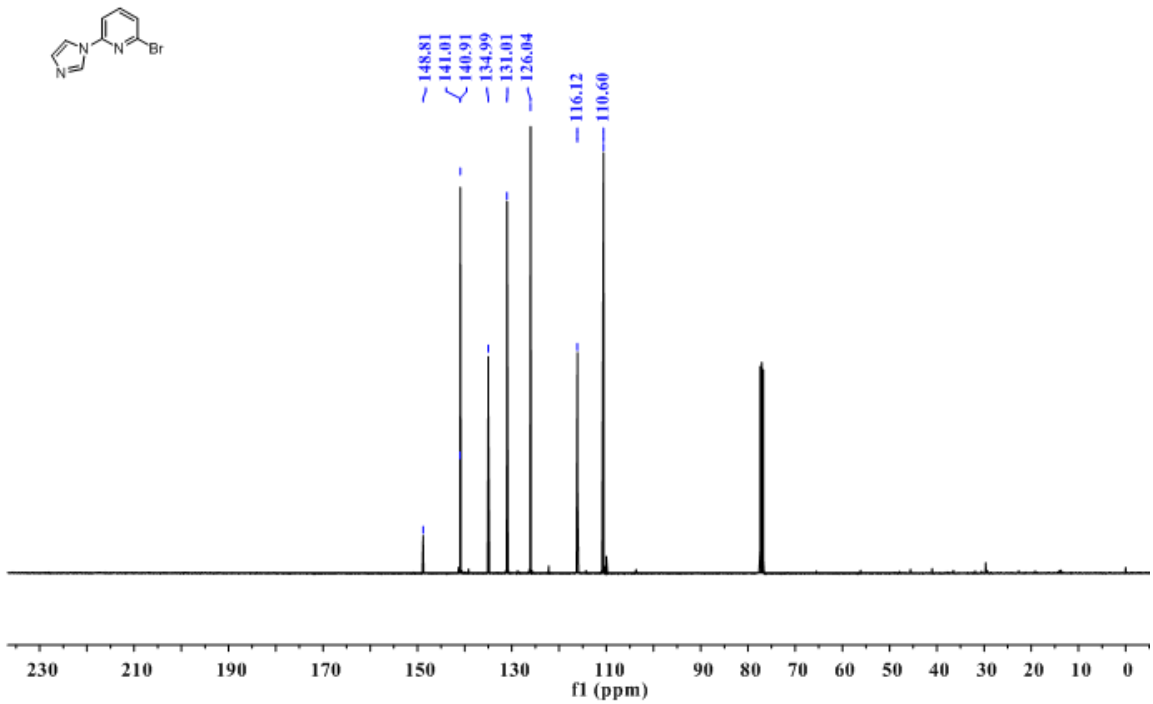

PROTON\_01  
XTPC VARIAN NMR-400  
maxiaowei\_LN\_15\_H1 CDCl3

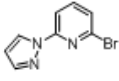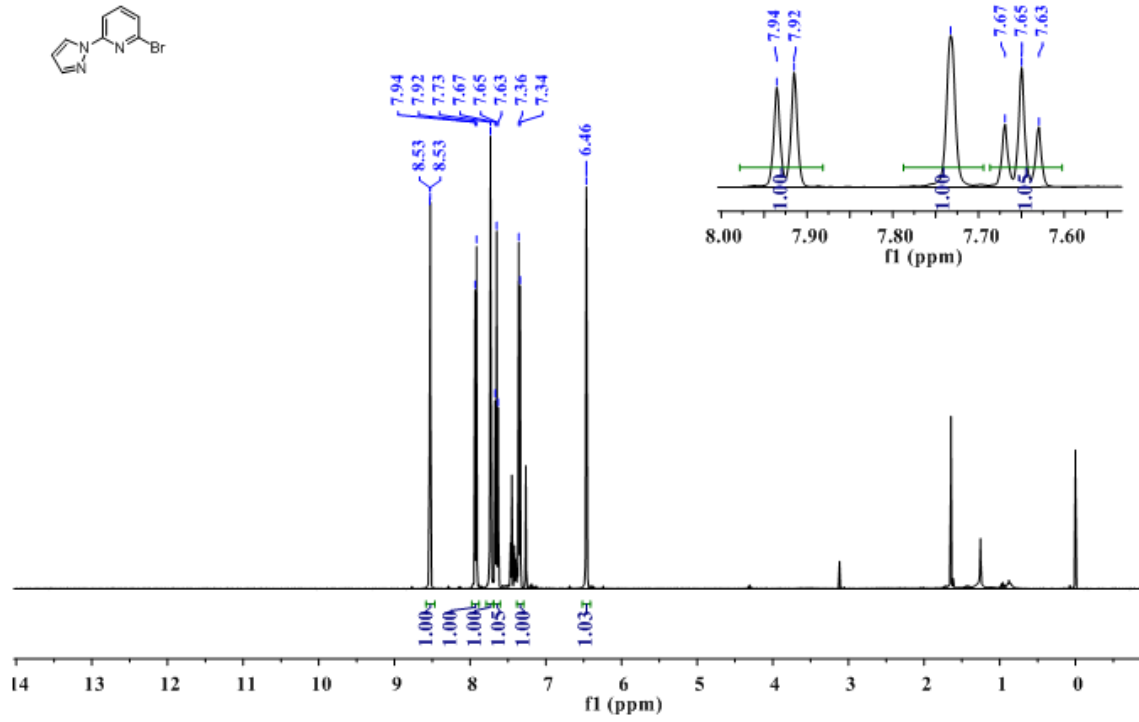

C13-4S-CDCl3-20131231-liuning-LN-15-shibexidaxue  
xinjiang daxue varian inova-400 13C-4N  
liuning-LN-15-shibexidaxue in CDCl3

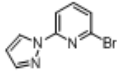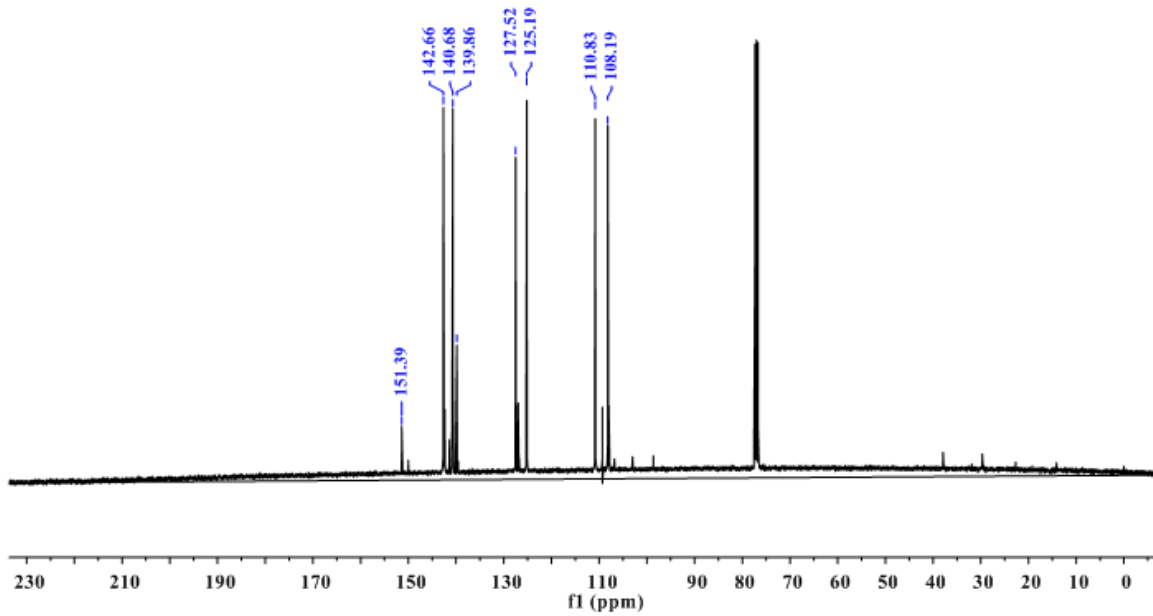

H1-4N-CDCl3-20131231-liuning-LN-11-shihexidaxue  
xinjiang daxue varian inova-400 IH-4N  
liuning-LN-11-shihexidaxue in CDCl3

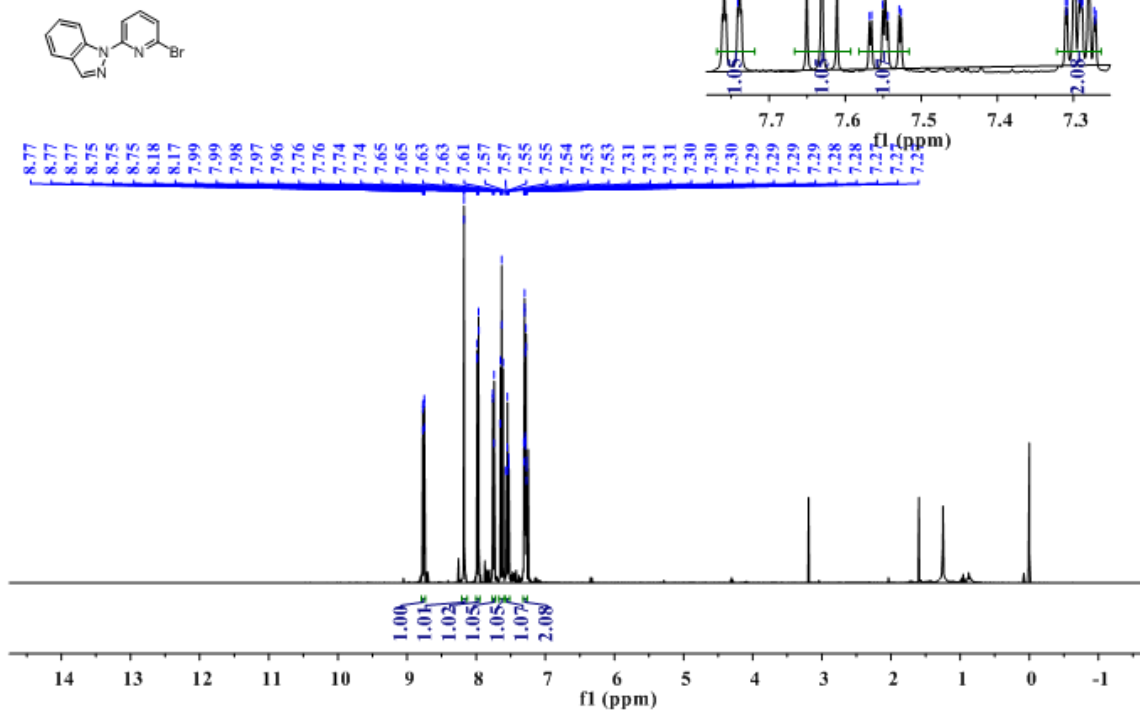

C13-4N-CDCl3-20131231-liuning-LN-11-shihexidaxue  
xinjiang daxue varian inova-400 13C-4N  
liuning-LN-11-shihexidaxue in CDCl3

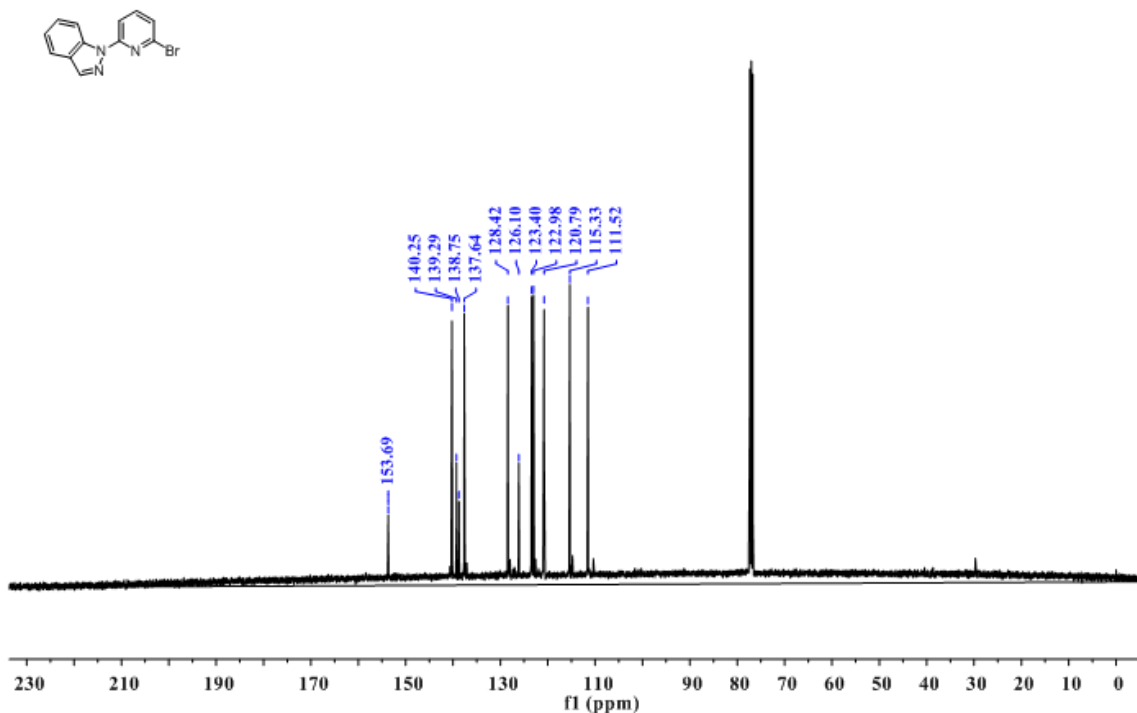

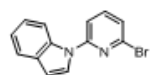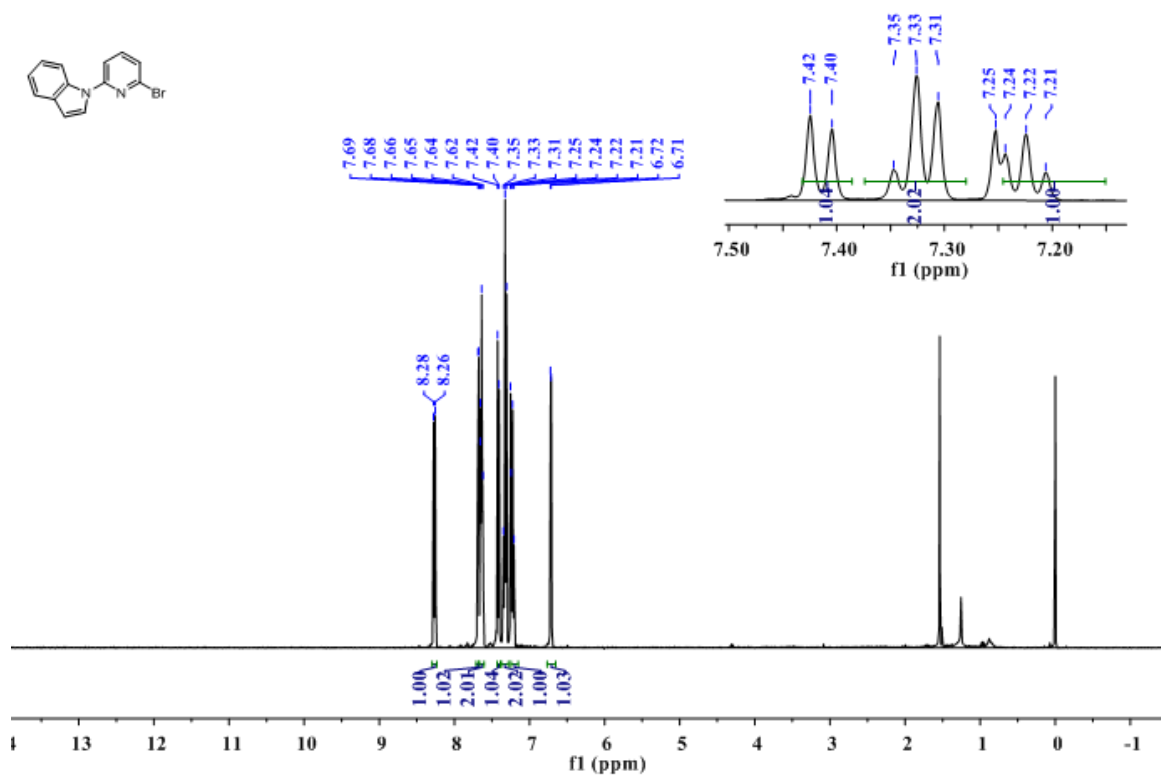

C13-4N-CDC13-20140101-13uning-LN-18-shihezidaxue  
 xinjiang daxue varian inova-400 13C-4N  
 13uning-LN-18-shihezidaxue in CDC13

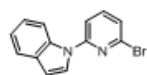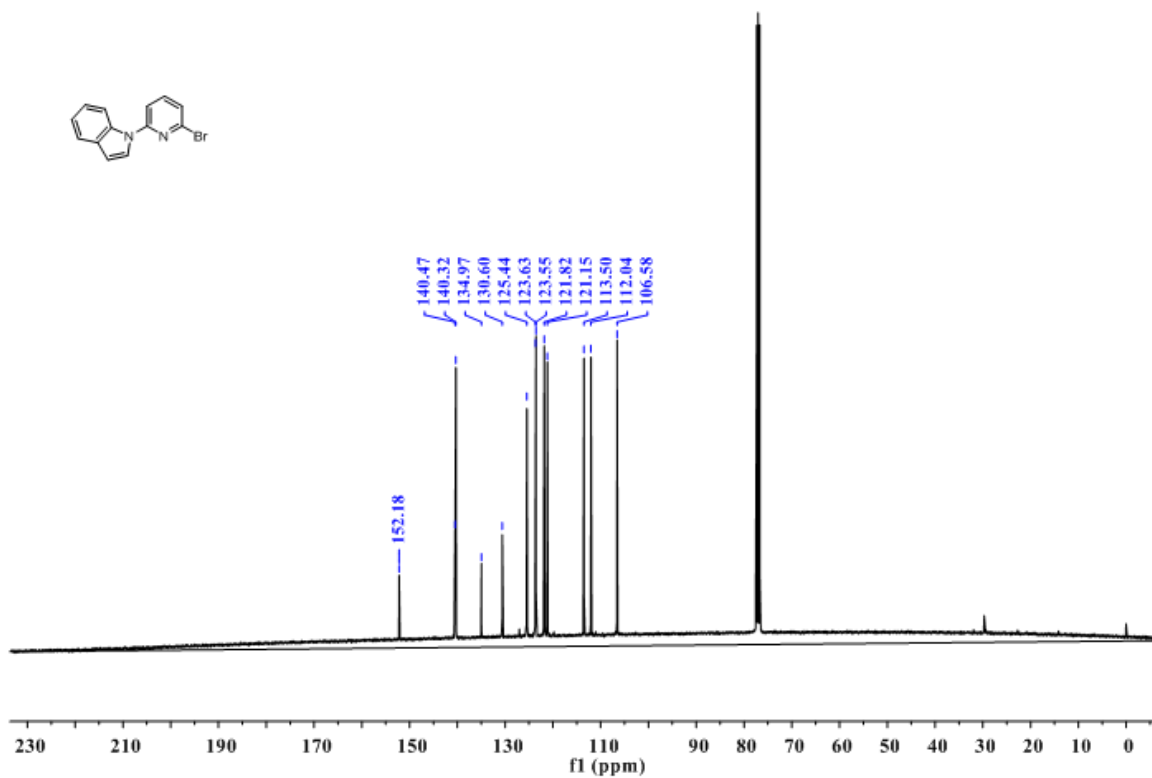

PROTON\_01  
XTPFC VARIAN MR-400  
maxiaowei\_LX\_41 CDCL3

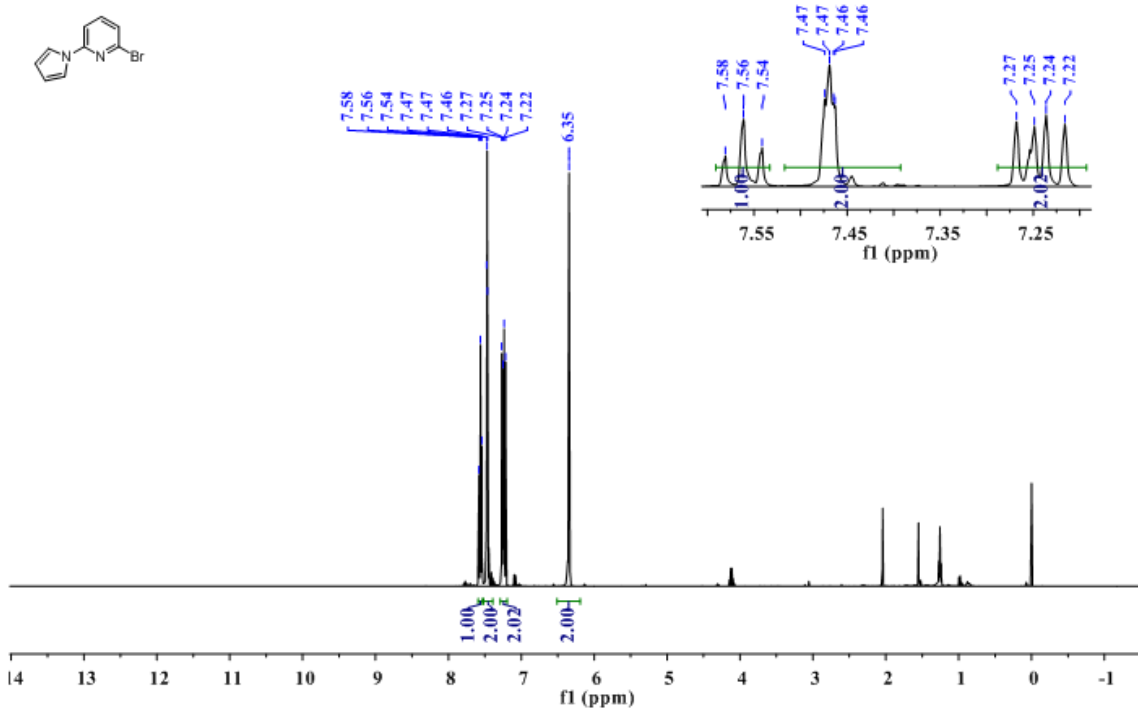

CARBON\_01  
XTPFC VARIAN MR-400  
maxiaowei\_LX\_41 CDCL3

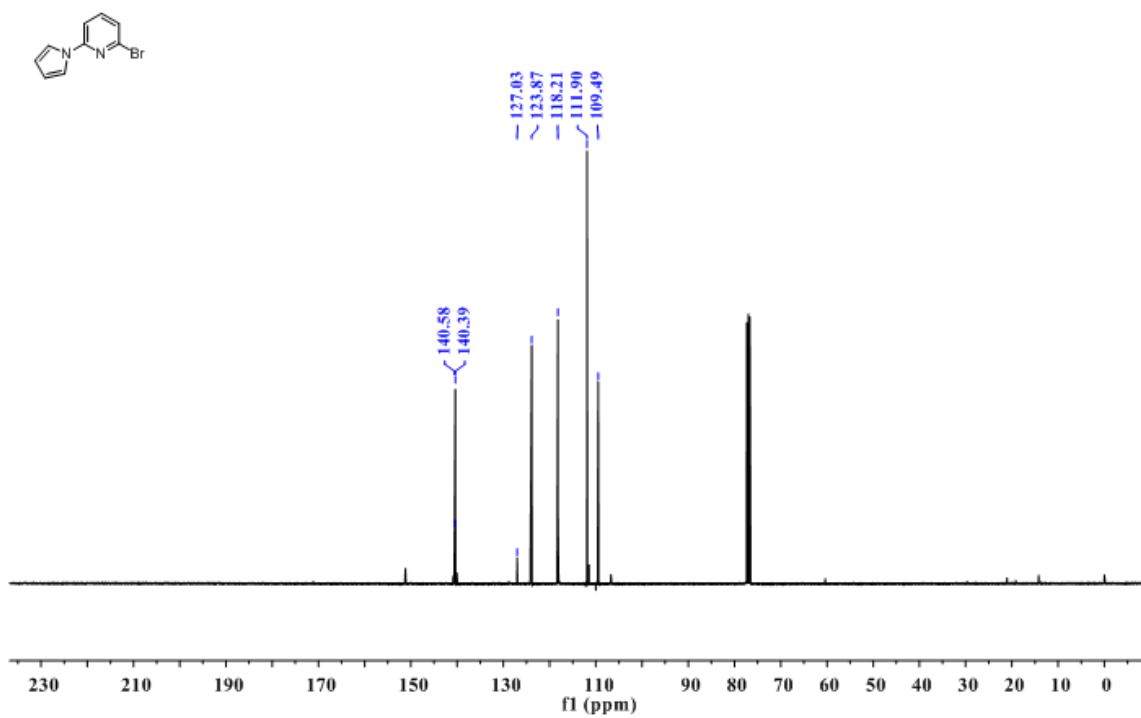



PROTON\_01  
XTPFC VARIAN MR-400  
maxiaowei\_LN\_42 CDCl3

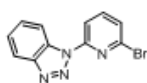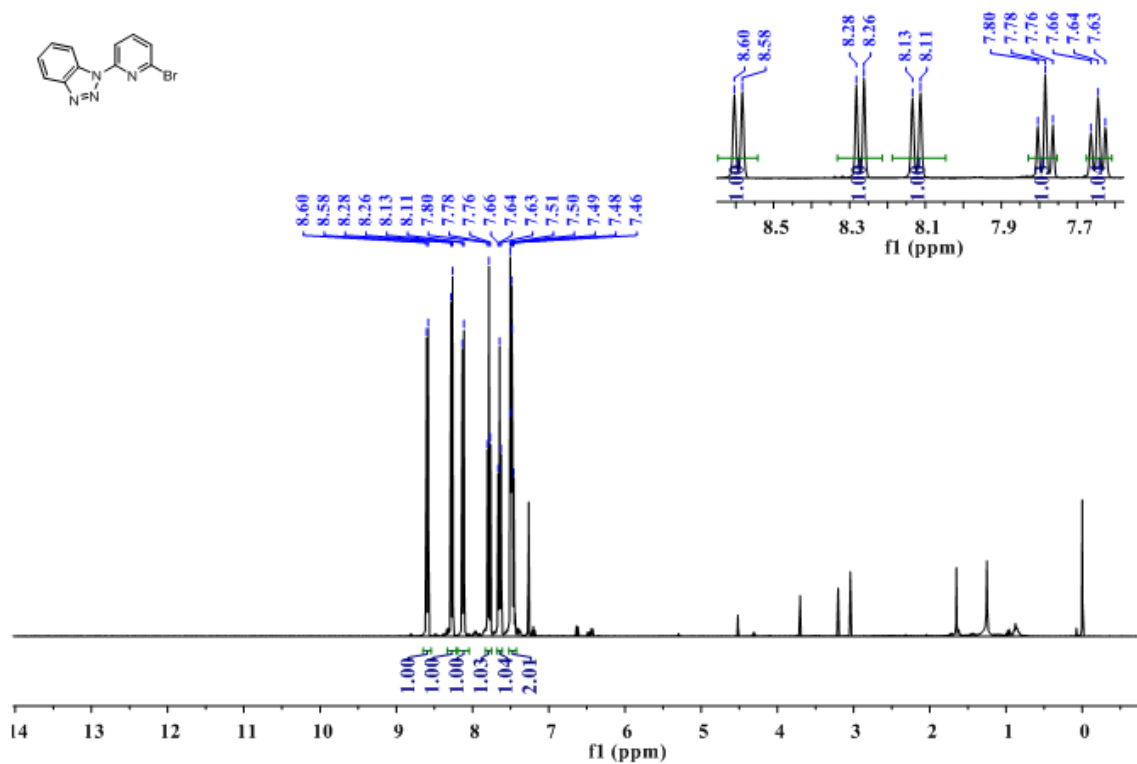

CARBON\_01  
XTPFC VARIAN MR-400  
maxiaowei\_LN\_42 CDCl3

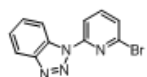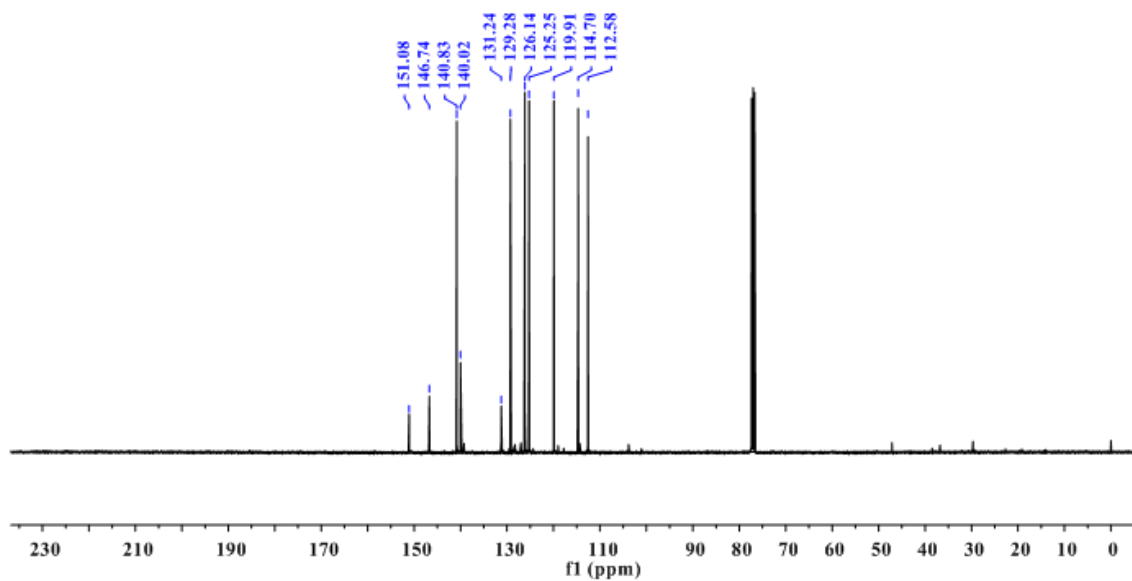

H1-4N-CDCl3-20140304-liuning-LN-46-shihezidaxue  
 xinjiang daxue varian inova-400 H1-4N  
 liuning-LN-46-shihezidaxue in CDCl3

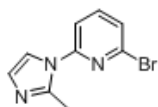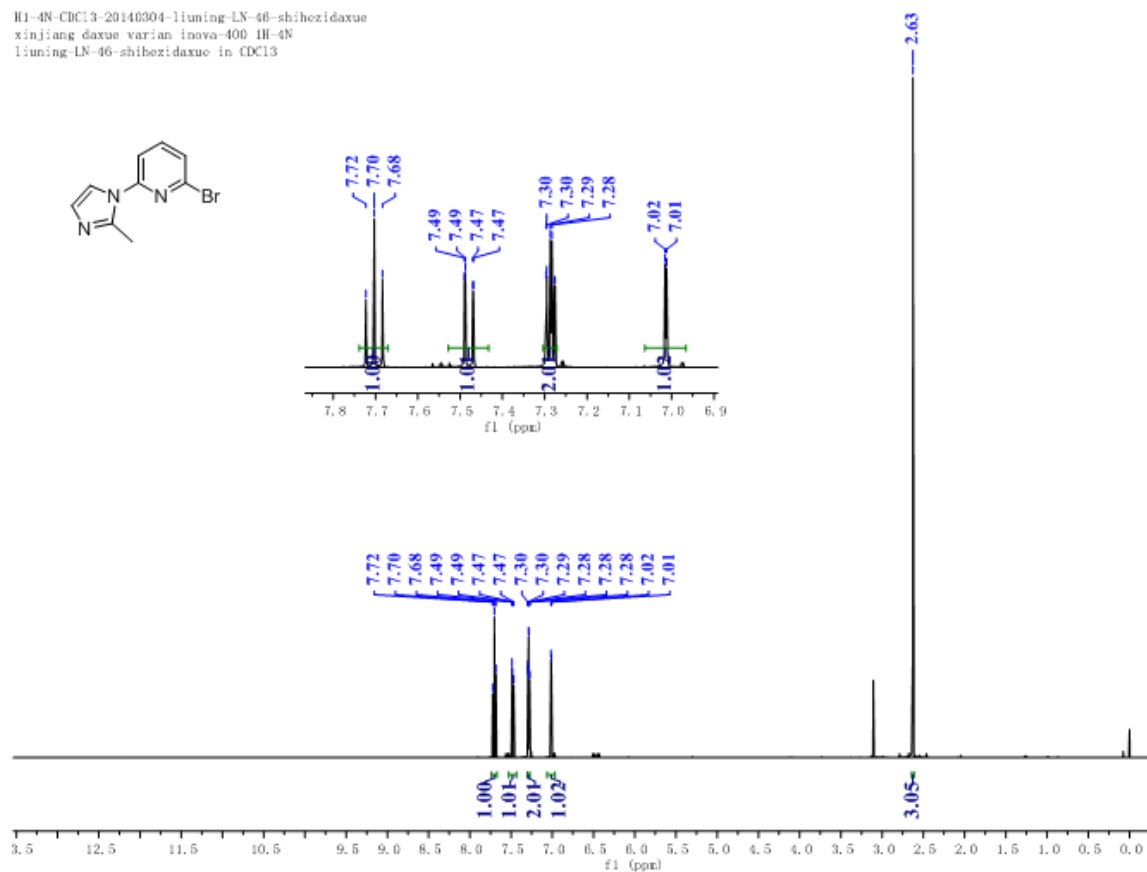

C13-4N-CDCl3-20140314-liuning-LN-46-shihezidaxue  
 xinjiang daxue varian inova-400 13C-4N  
 liuning-LN-46-shihezidaxue in CDCl3

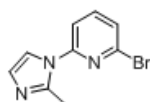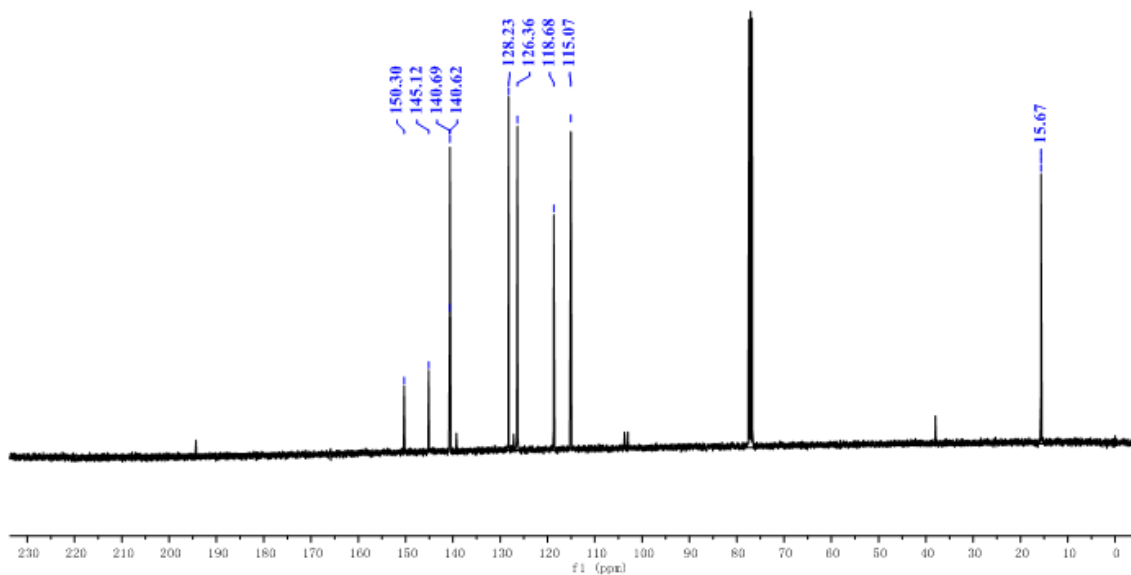

H1-4N-CDC13-20140305-liuning-LN-47-shihezidaxue  
xinjiang daxue varian inova-400 1H-4N  
liuning-LN-47-shihezidaxue in CDC13

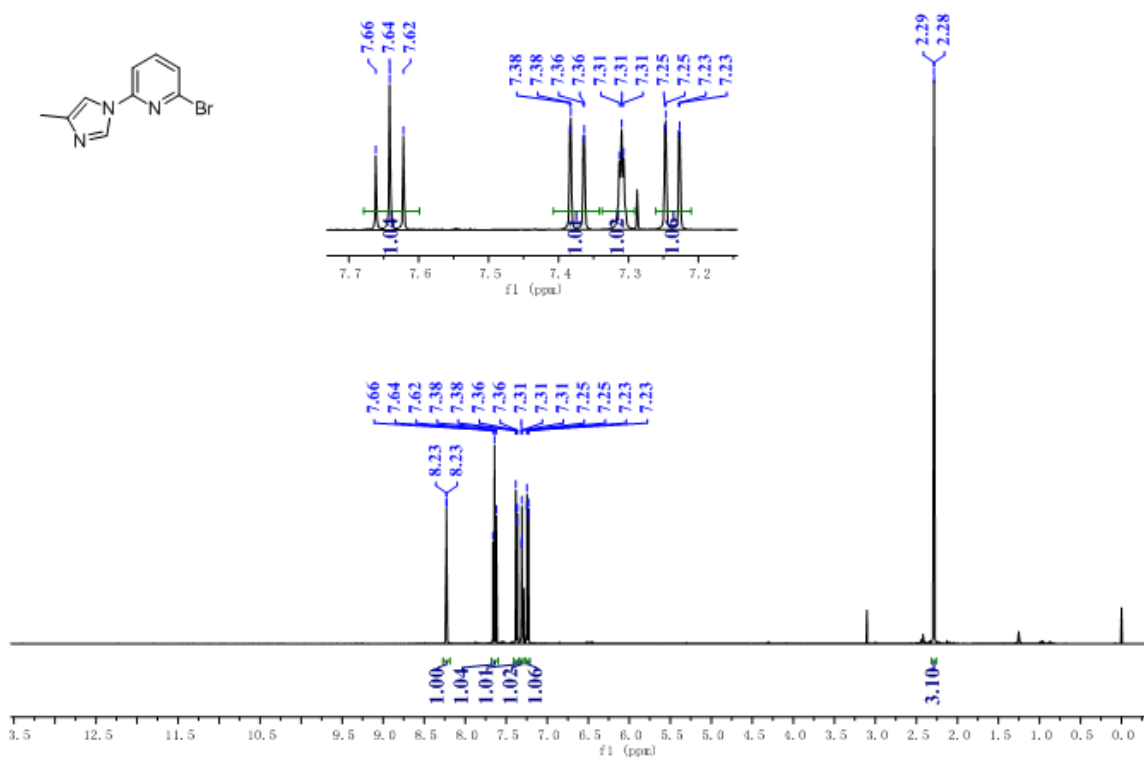

C13-4N-CDC13-20140314-liuning-LN-47-shihezidaxue  
xinjiang daxue varian inova-400 13C-4N  
liuning-LN-47-shihezidaxue in CDC13

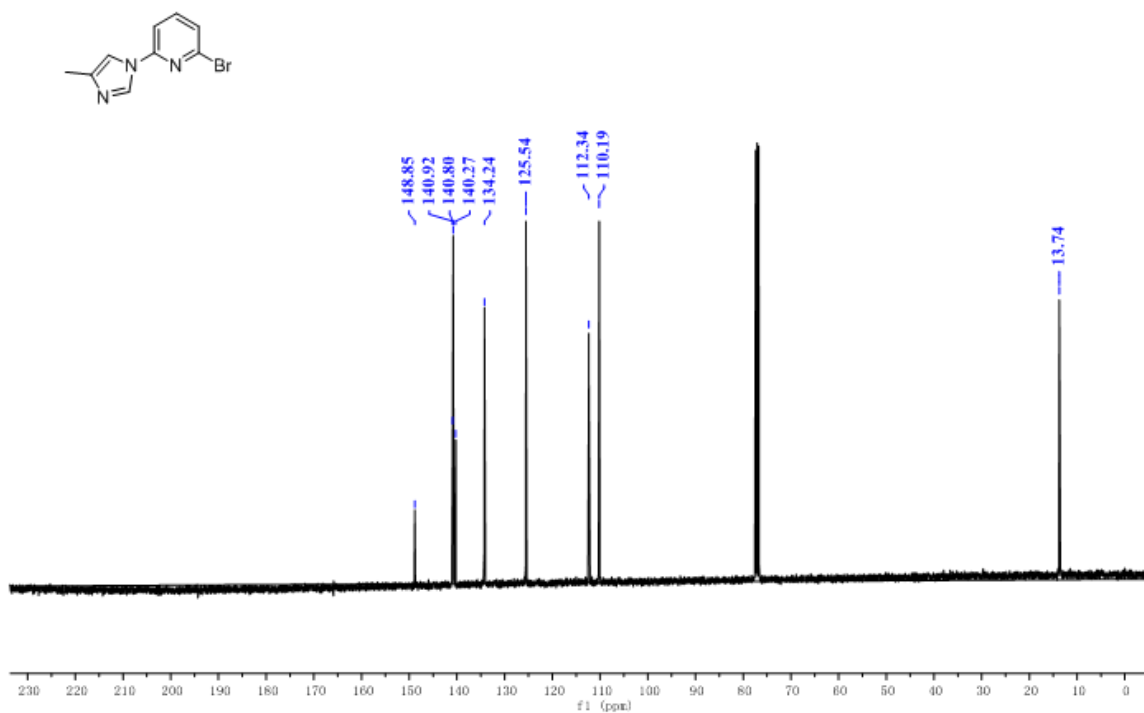

H1-4N-CDCl3-20140305-liuning-LN-48-shihezidaxue  
xinjiang daxue varian inova-400 IH-4N  
liuning-LN-48-shihezidaxue in CDCl3

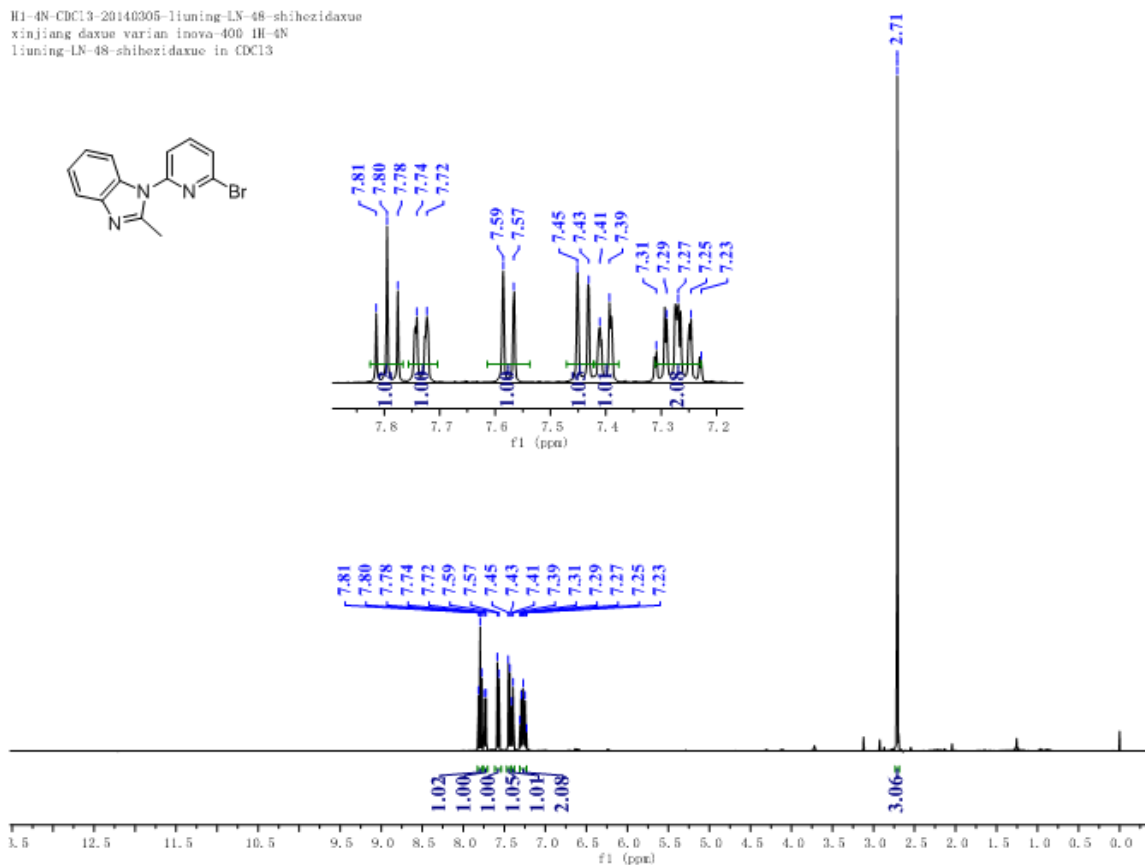

C13-4N-CDCl3-20140314-liuning-LN-48-shihezidaxue  
xinjiang daxue varian inova-400 13C-4N  
liuning-LN-48-shihezidaxue in CDCl3

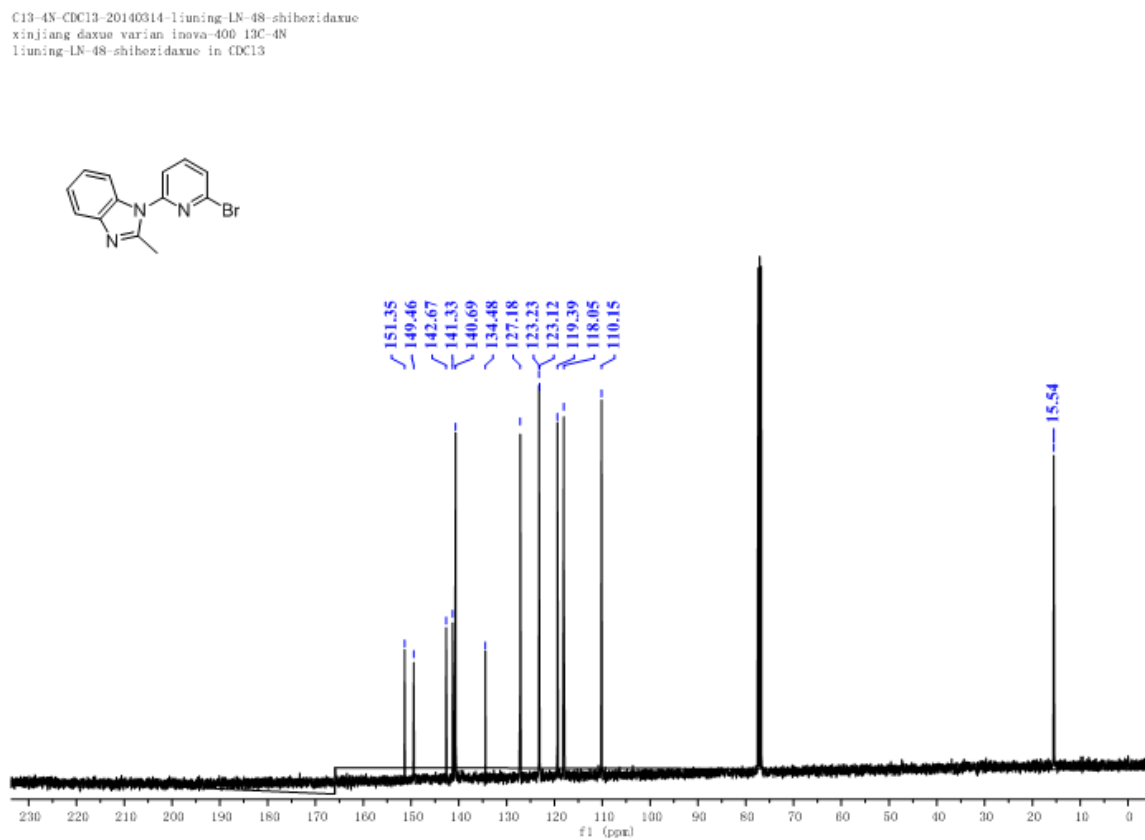

H1-4N-CDCl3-20140305-liuning-LN-50-shihexidaxue  
 xinjiang daxue varian inova-400 IH-4N  
 liuning-LN-50-shihexidaxue in CDCl3

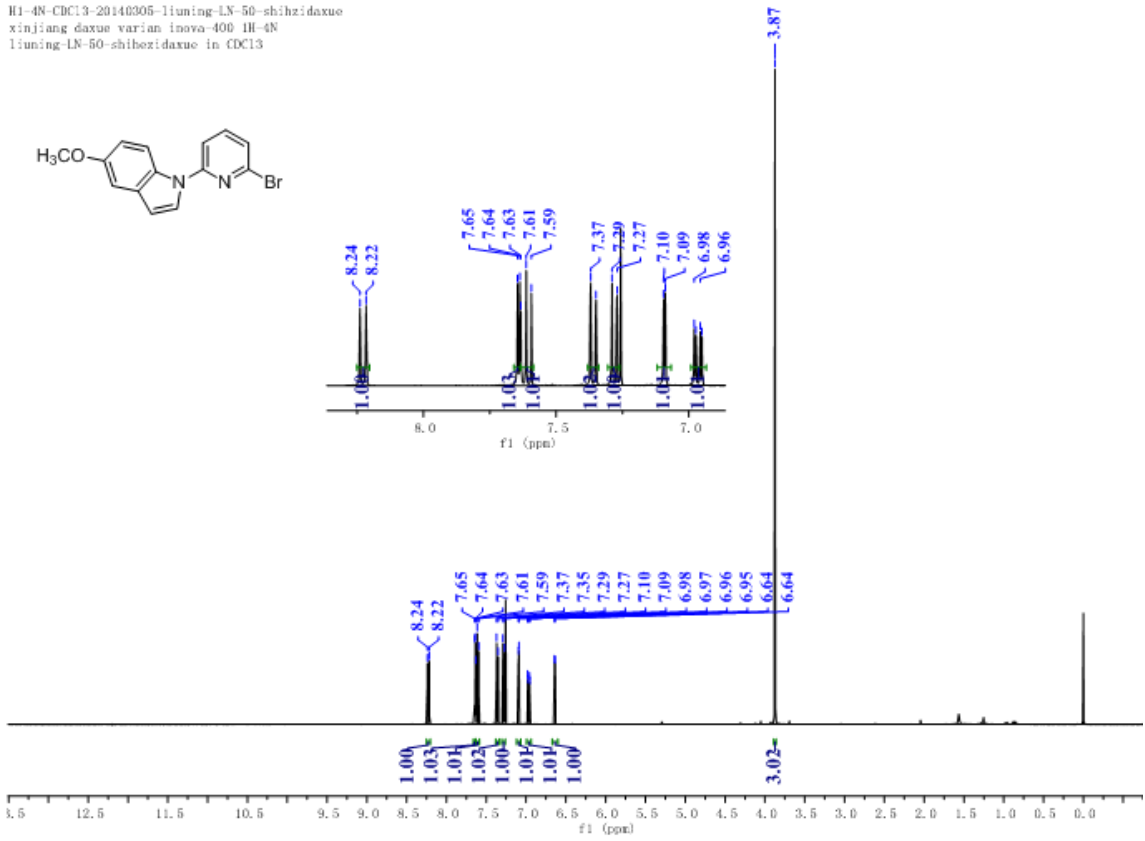

C13-4N-CDCl3-20140315-liuning-LN-50-shihexidaxue  
 xinjiang daxue varian inova-400 13C-4N  
 liuning-LN-50-shihexidaxue in CDCl3

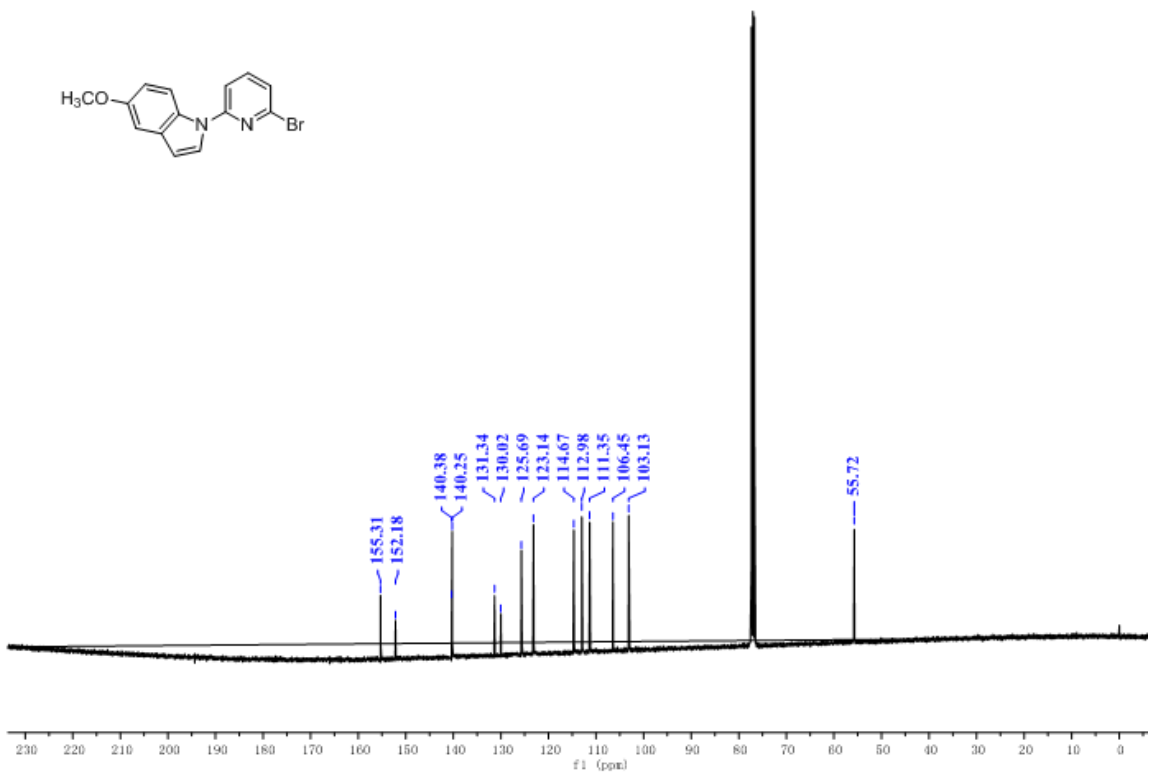

H1-4N-CDC13-20140405-liuning-LN-09-shihezidaxue  
 xinjiang daxue varian inova-400 1H-4N  
 liuning-LN-09-shihezidaxue  
 in CDC13

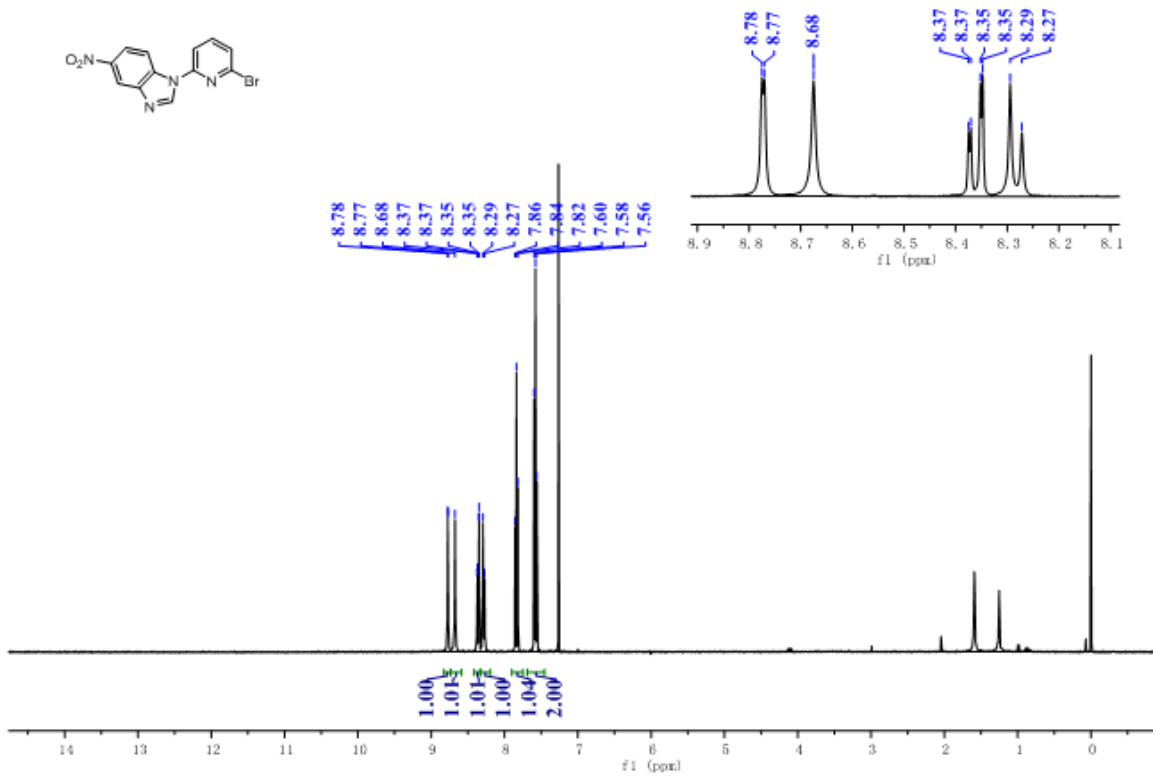

C13-4N-CDC13-20140417-liuning-LN-09-shihezidaxue  
 xinjiang daxue varian inova-400 13C-4N  
 liuning-LN-09-shihezidaxue in CDCl3

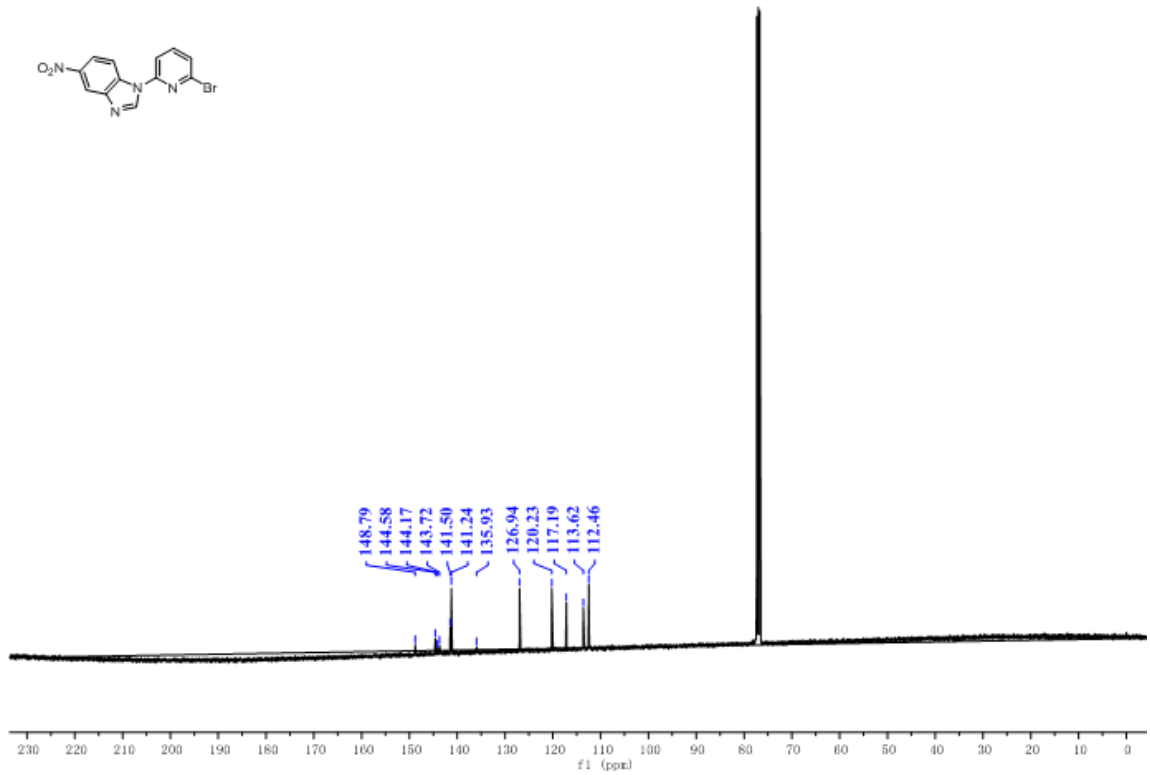

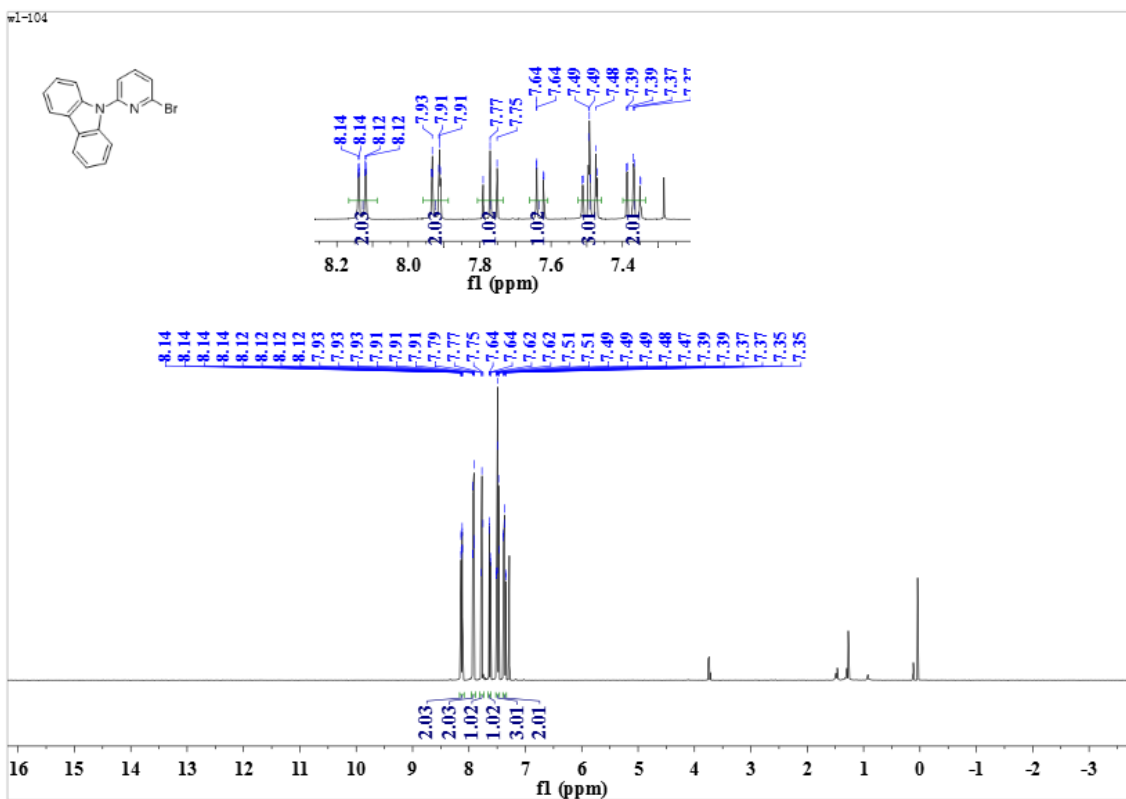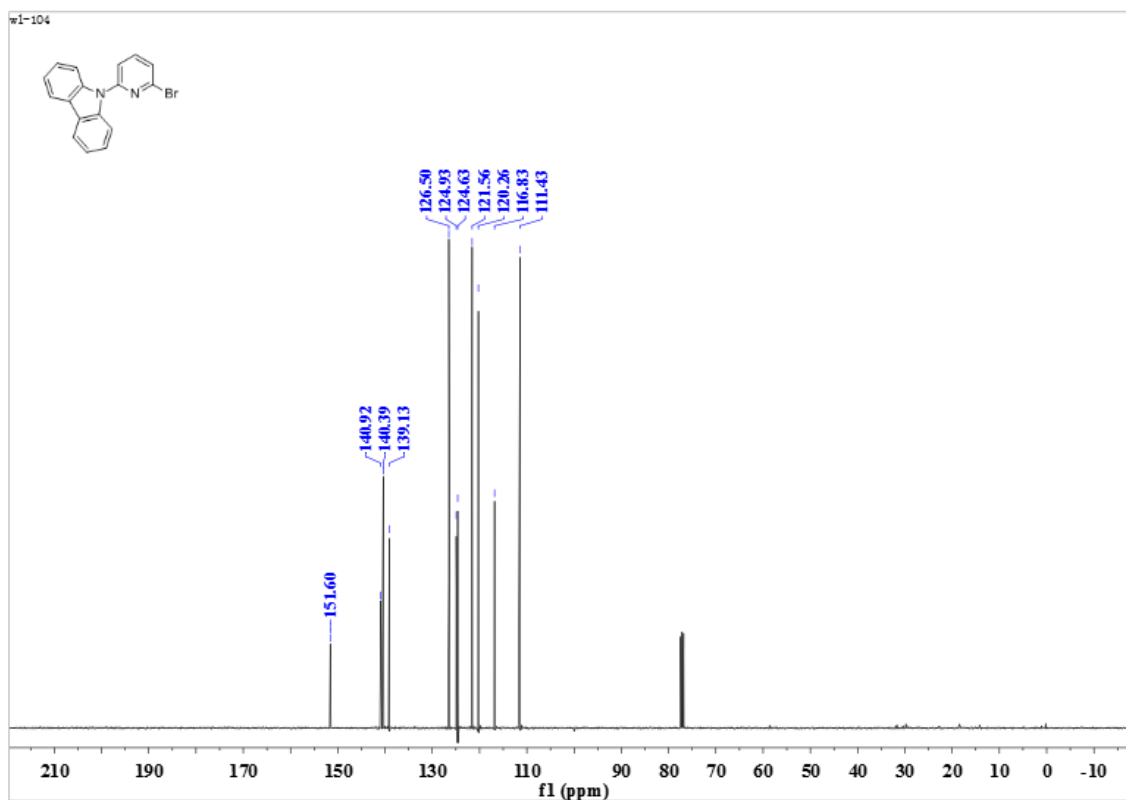

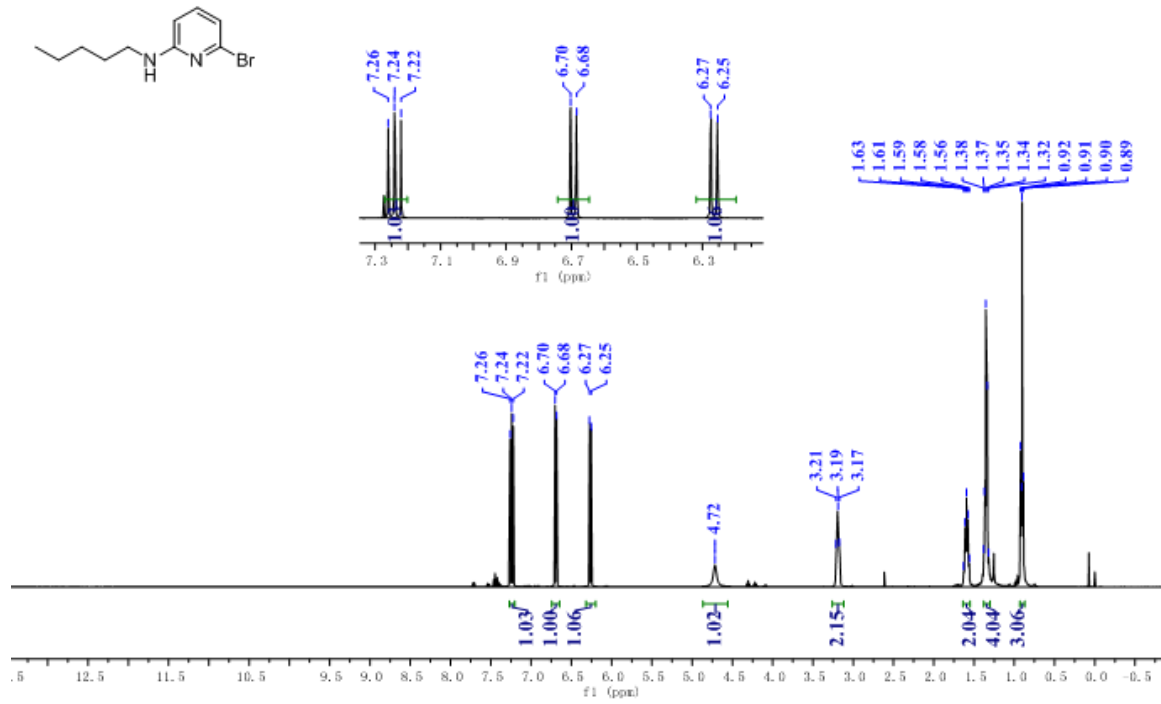

C13-4N-CDC13-20140315-liuning-LN-52-shihezidaxue  
 xinjiang daxue varian inova-400 13C-4N  
 liuning-LN-52-shihezidaxue in CDC13

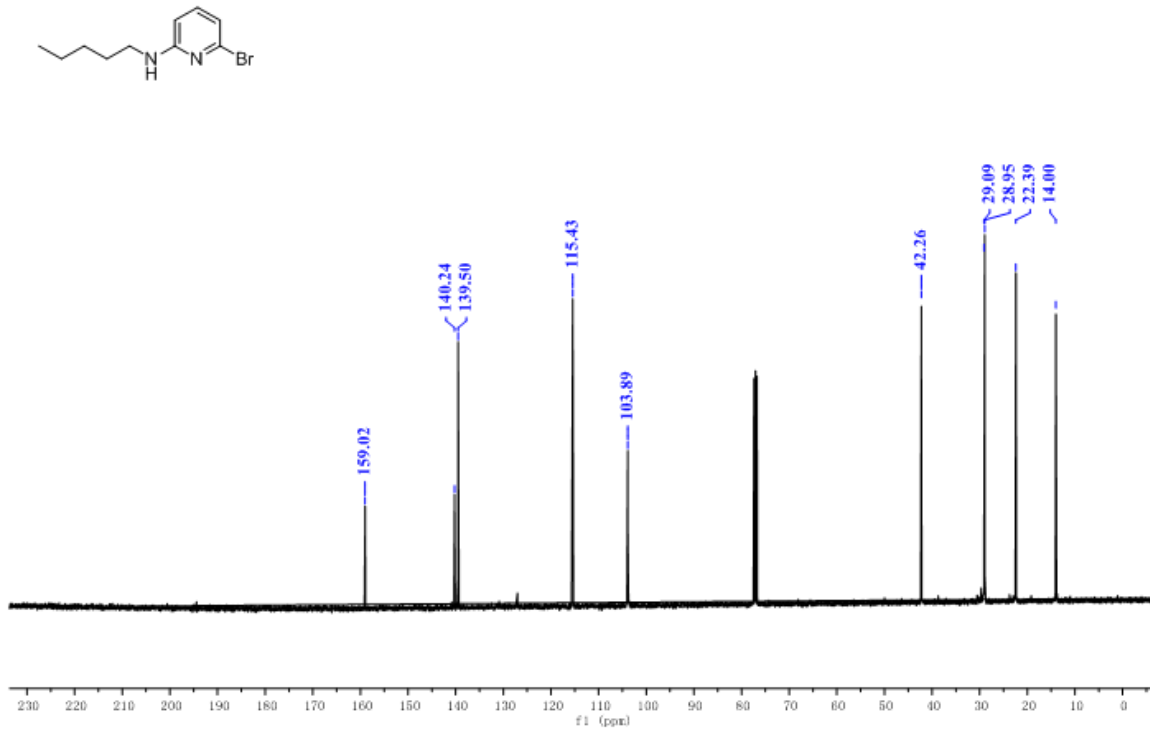



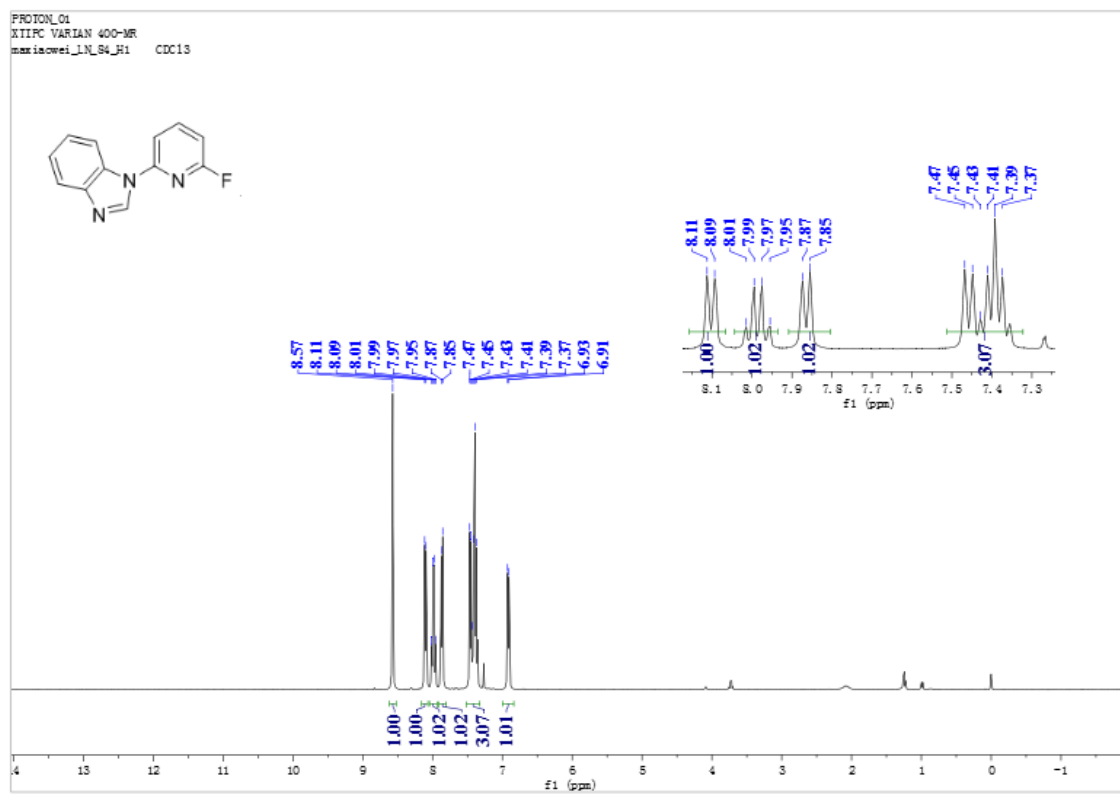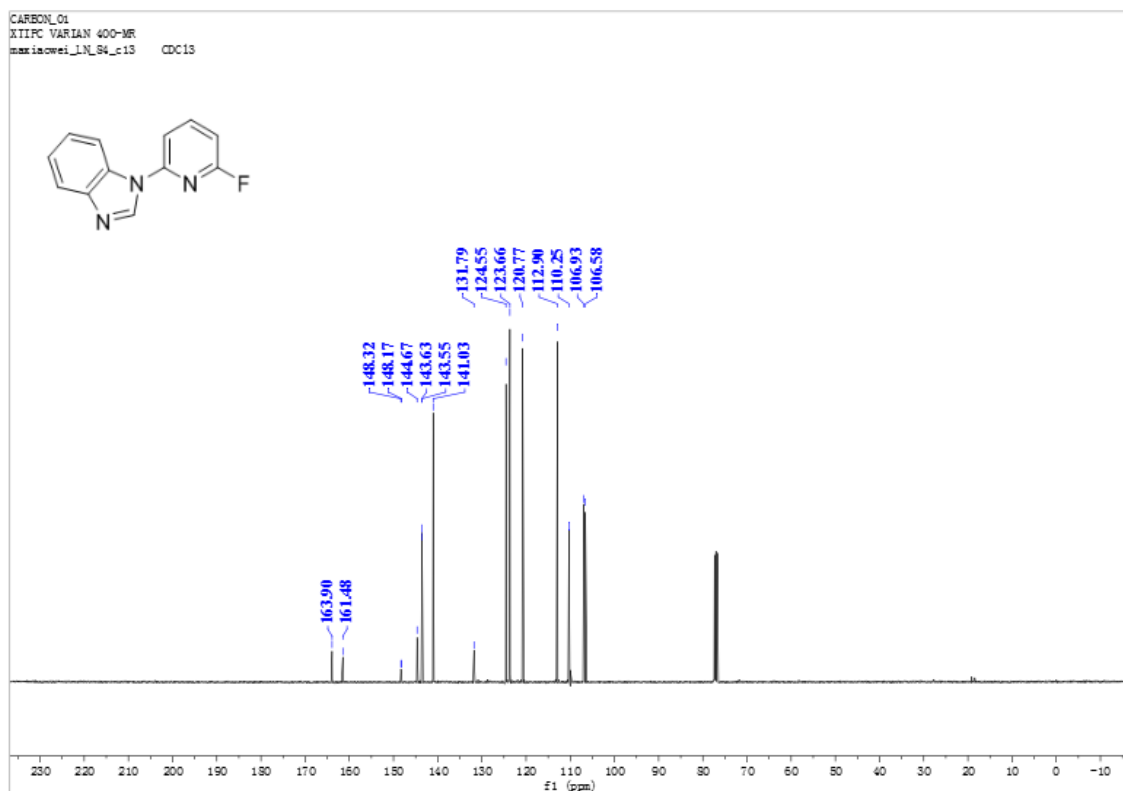

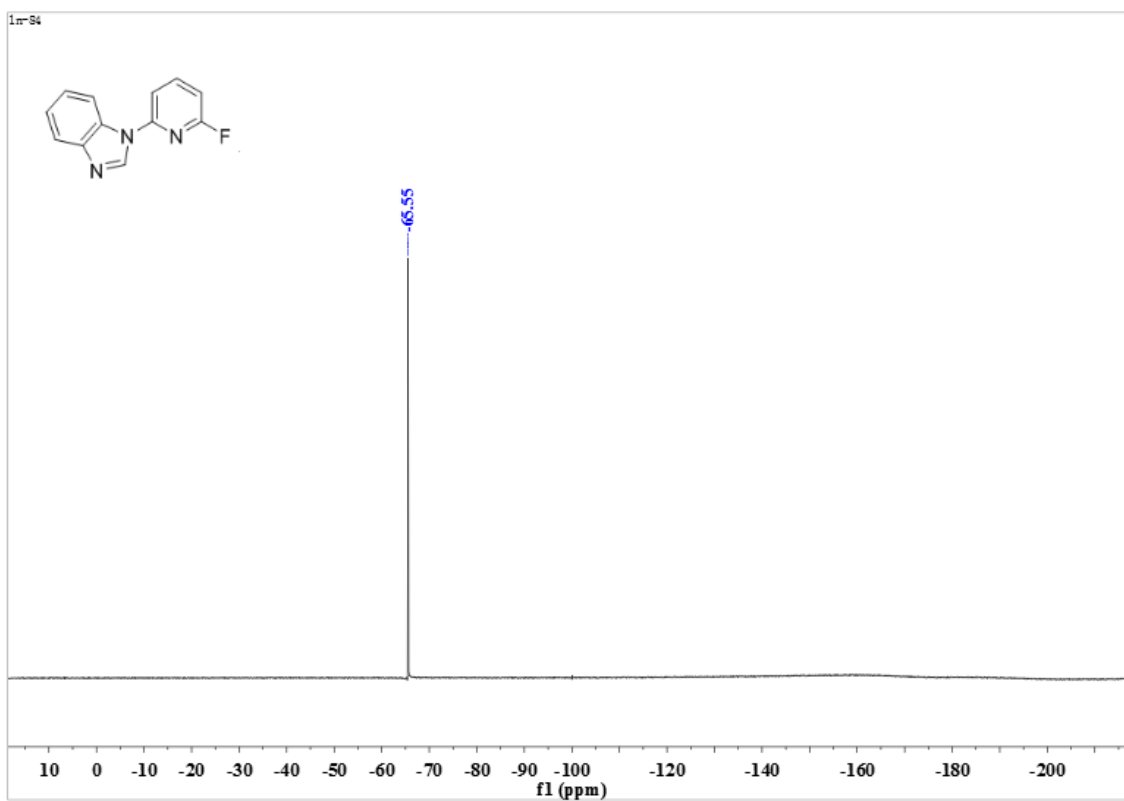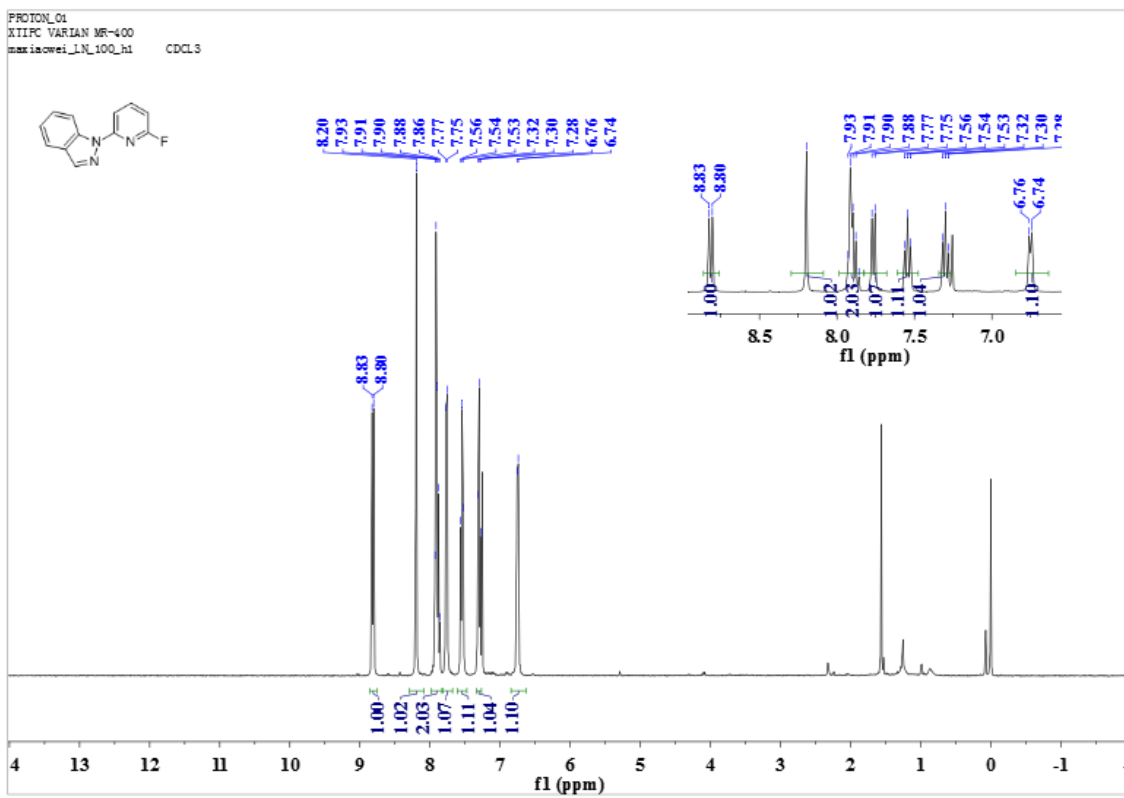

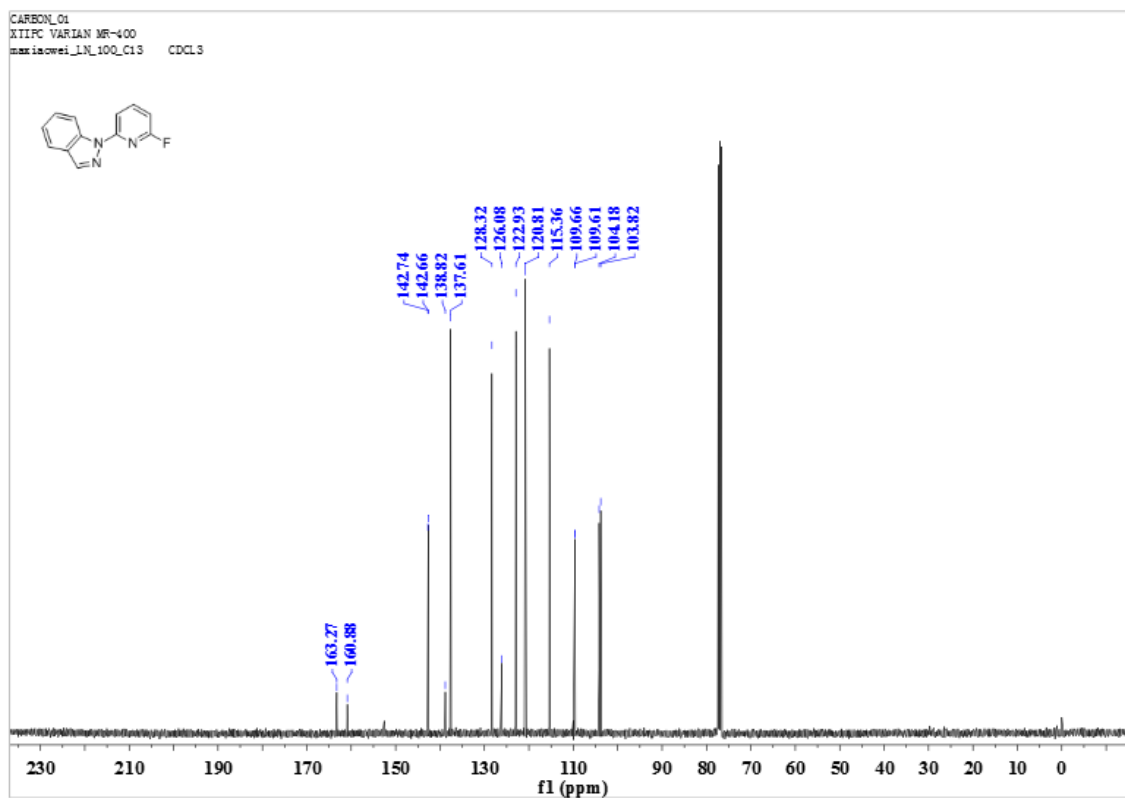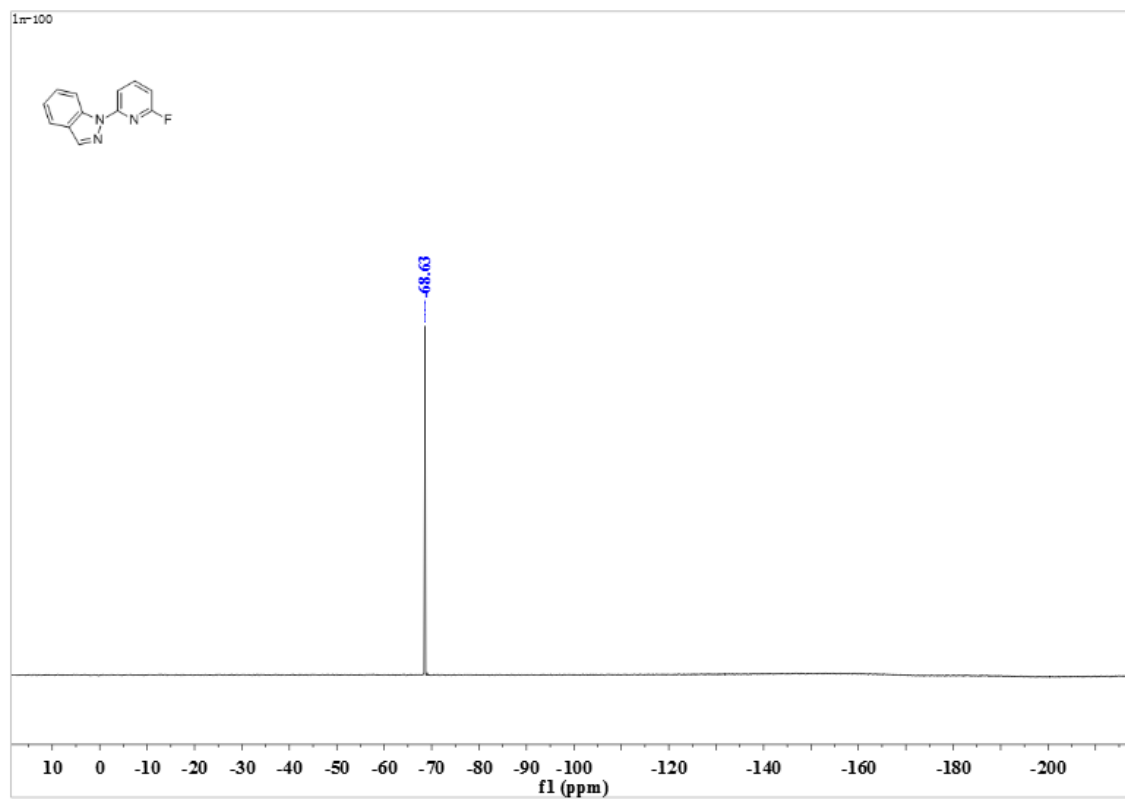

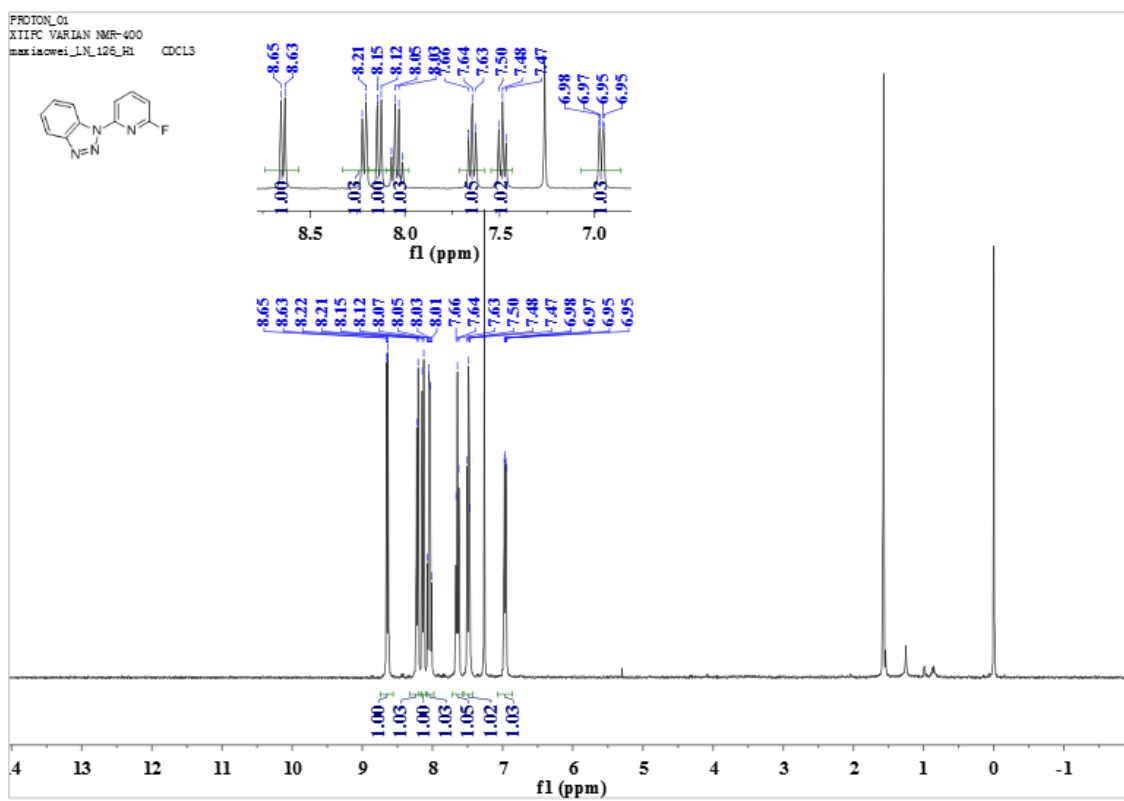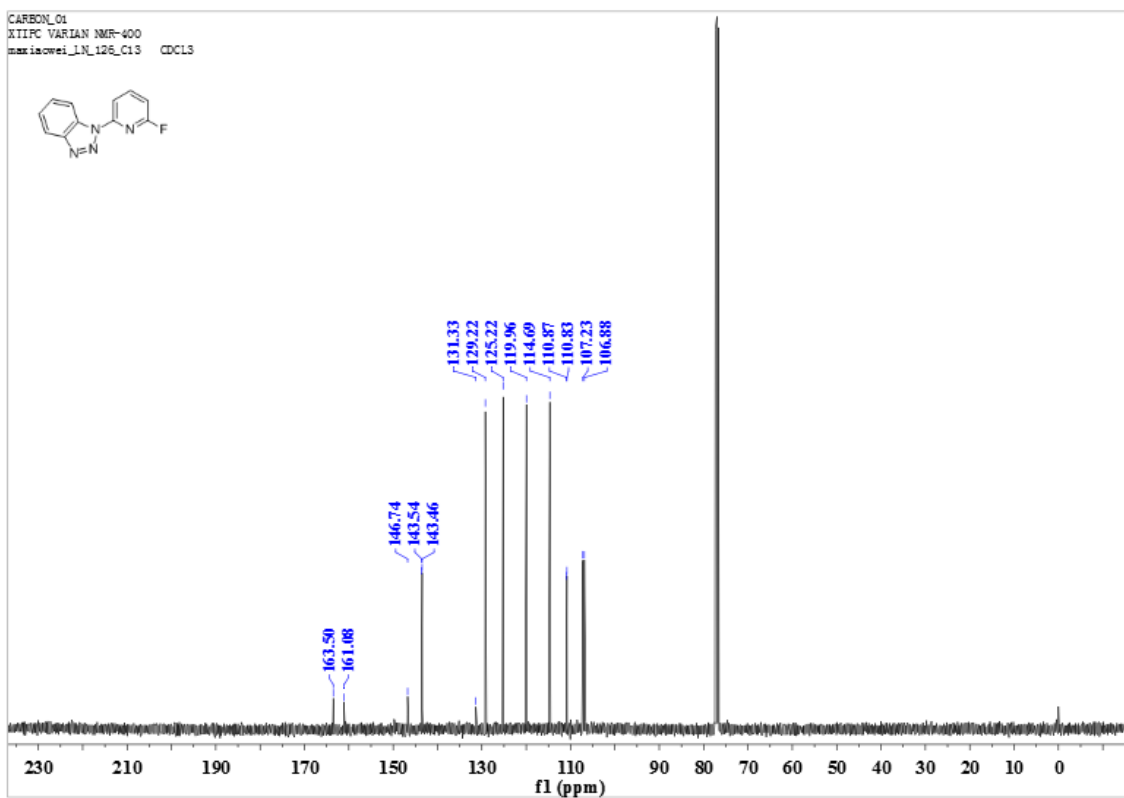

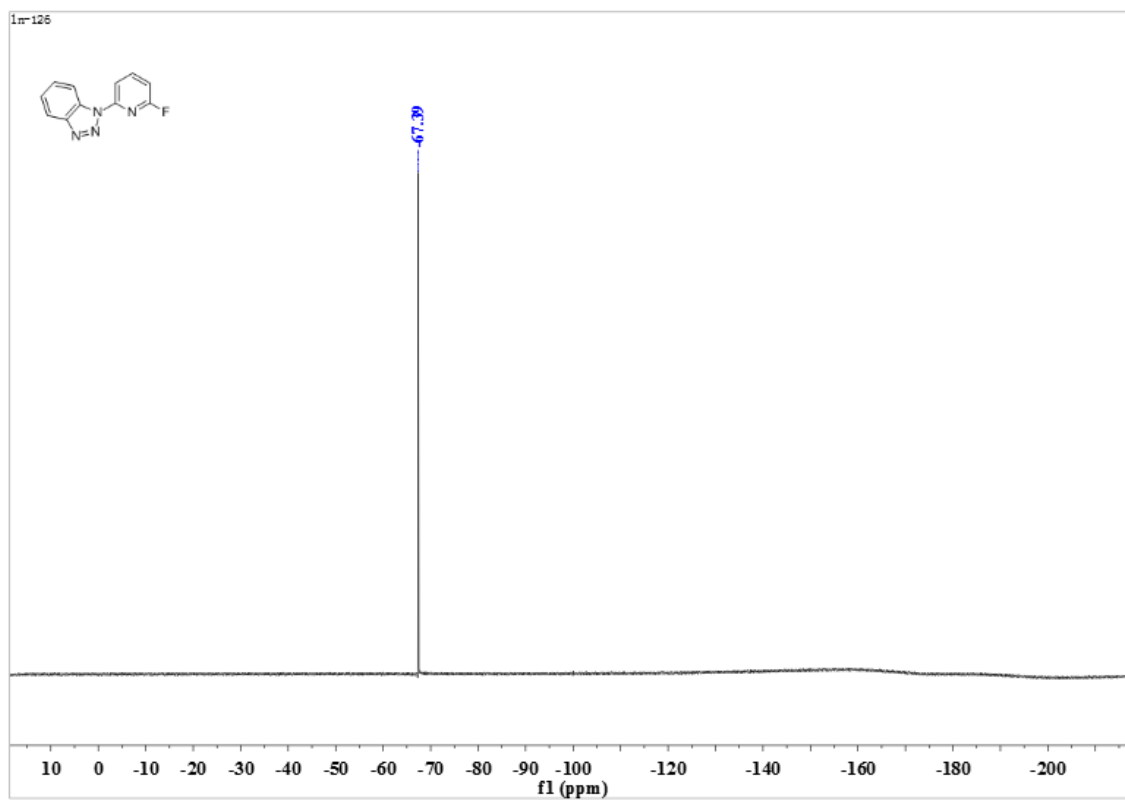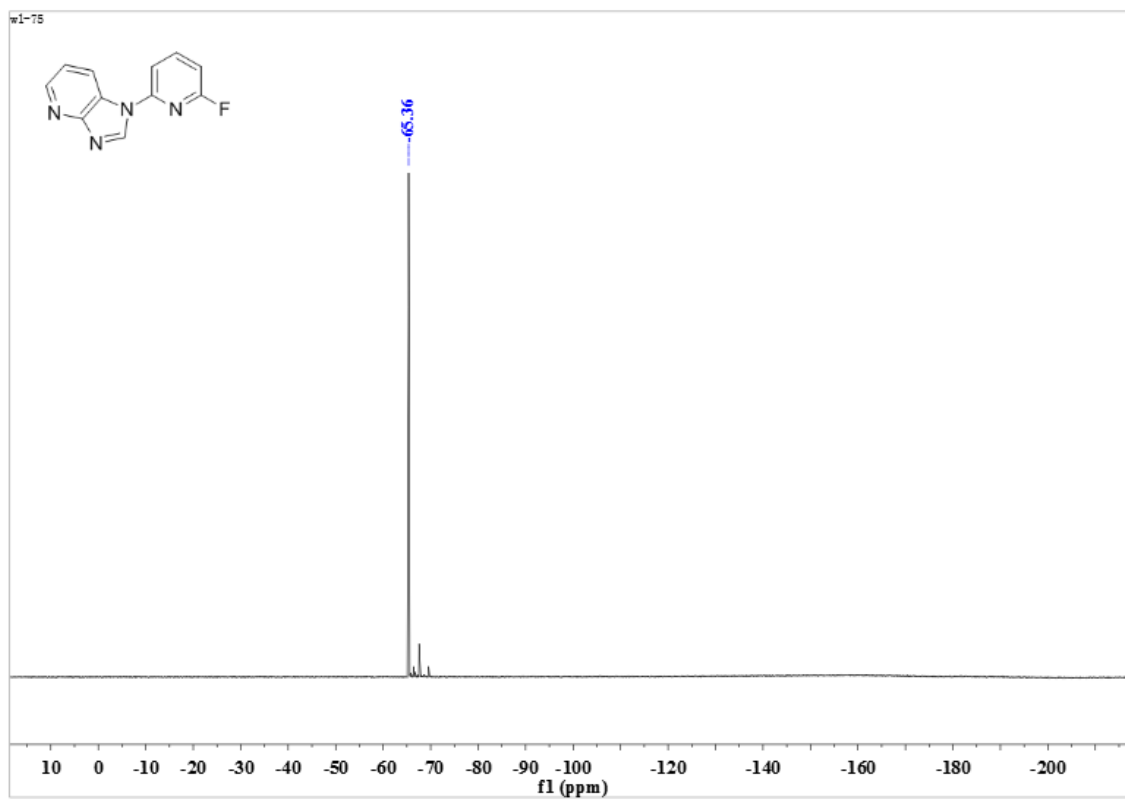

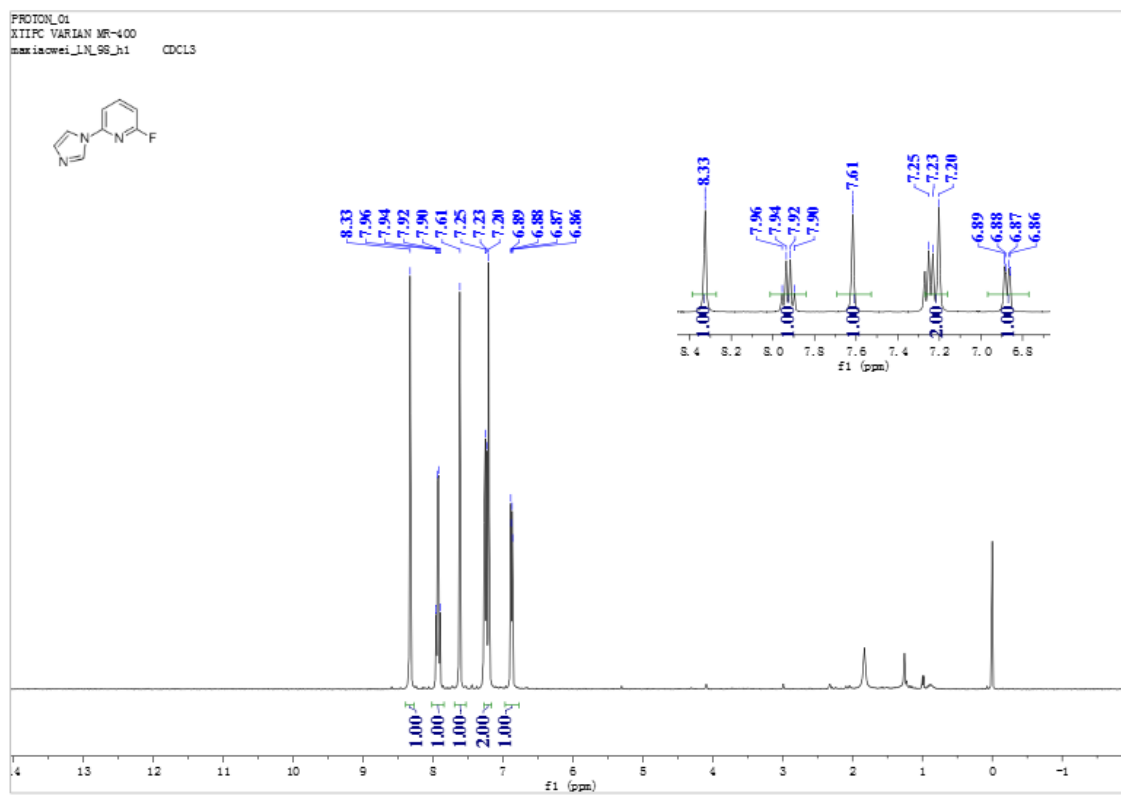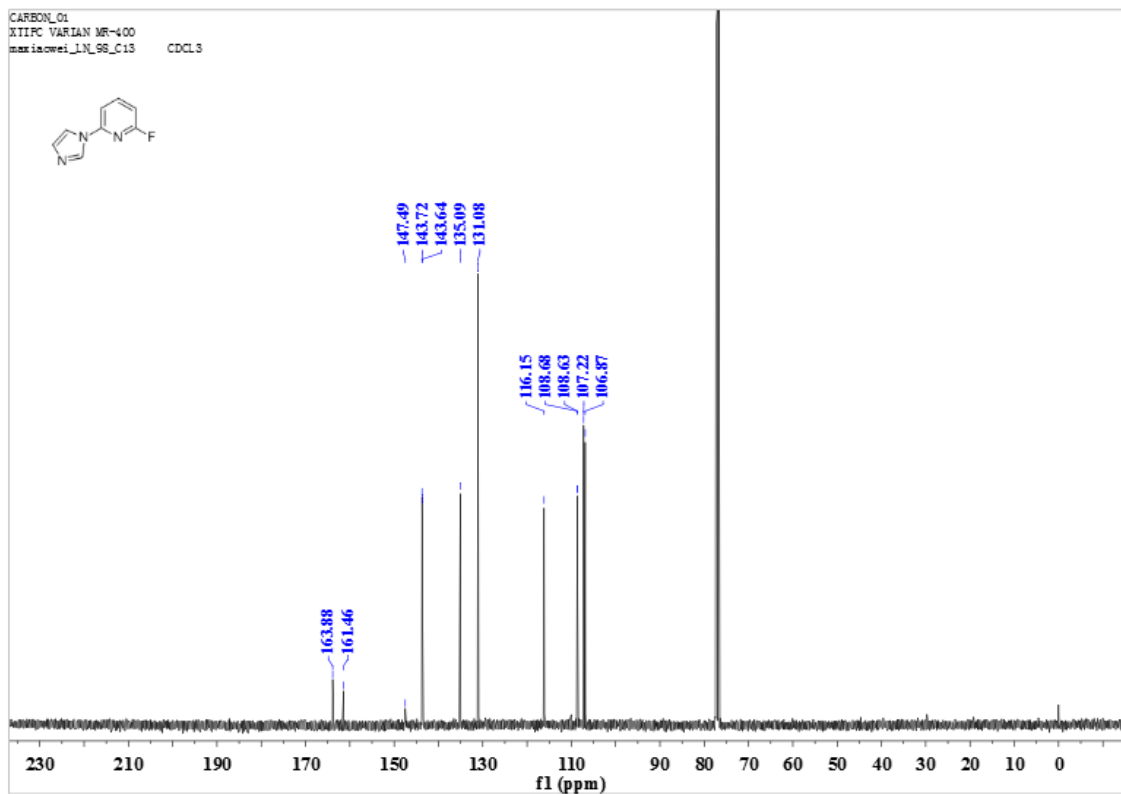

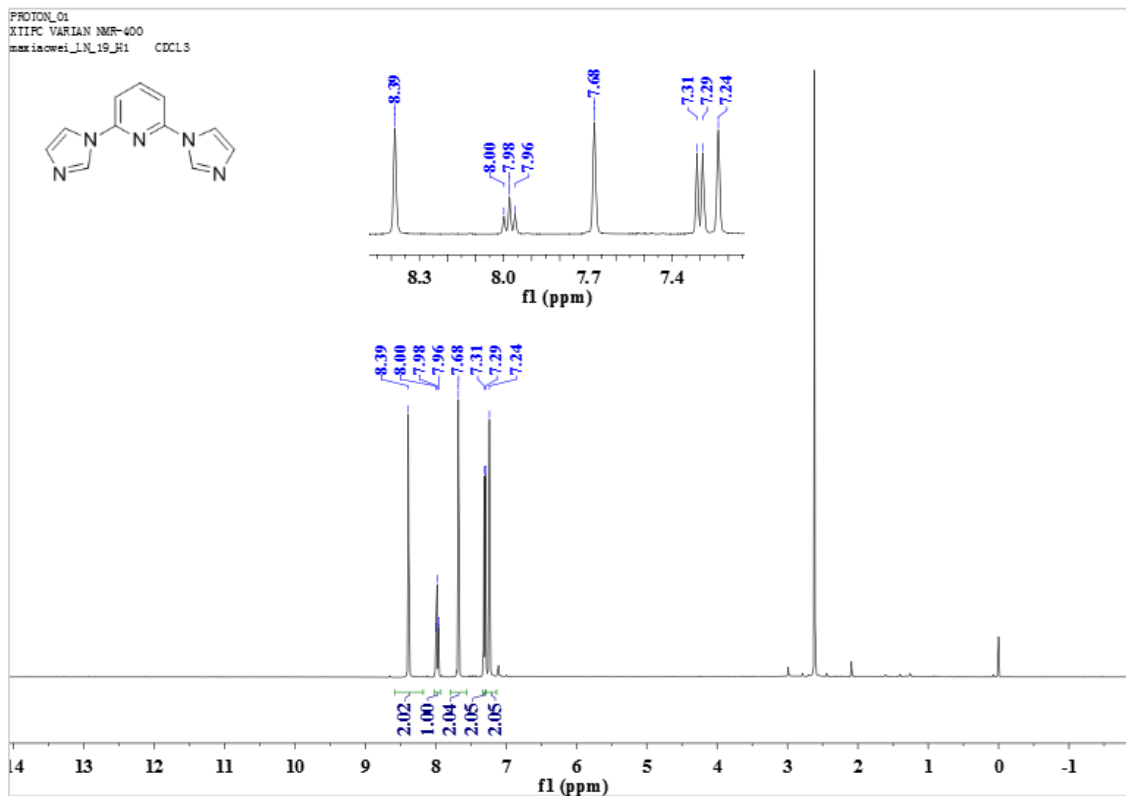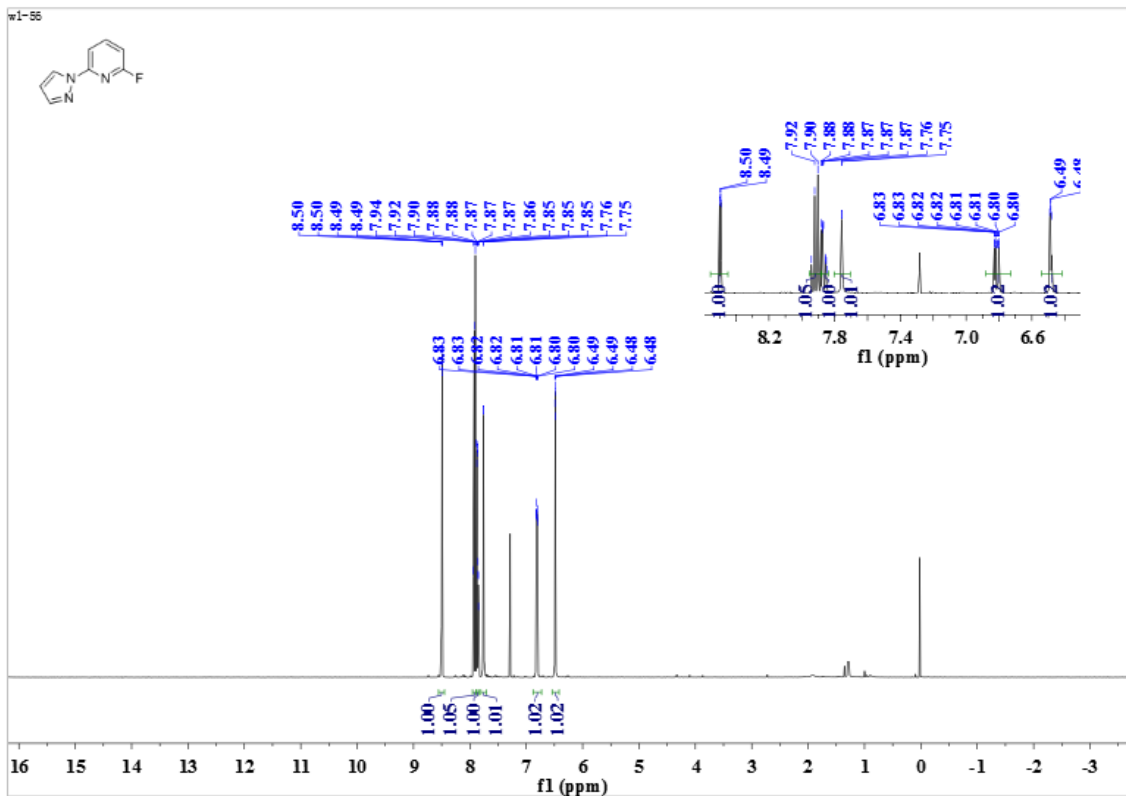

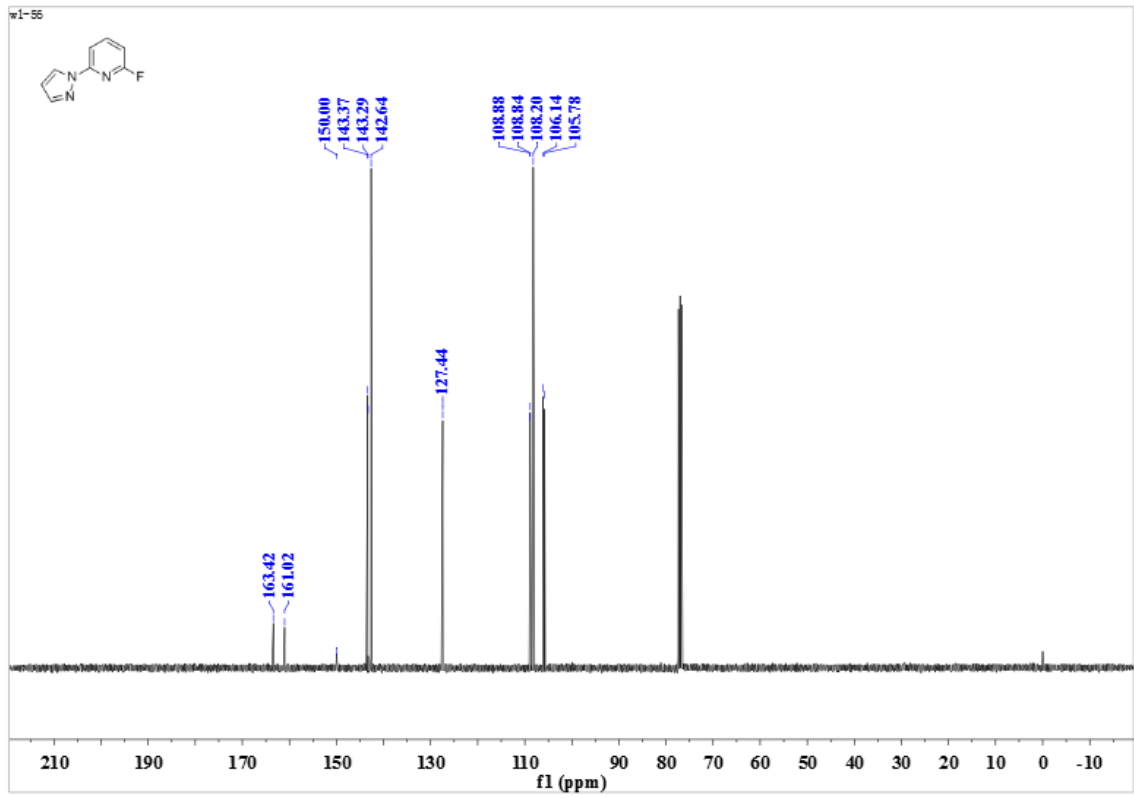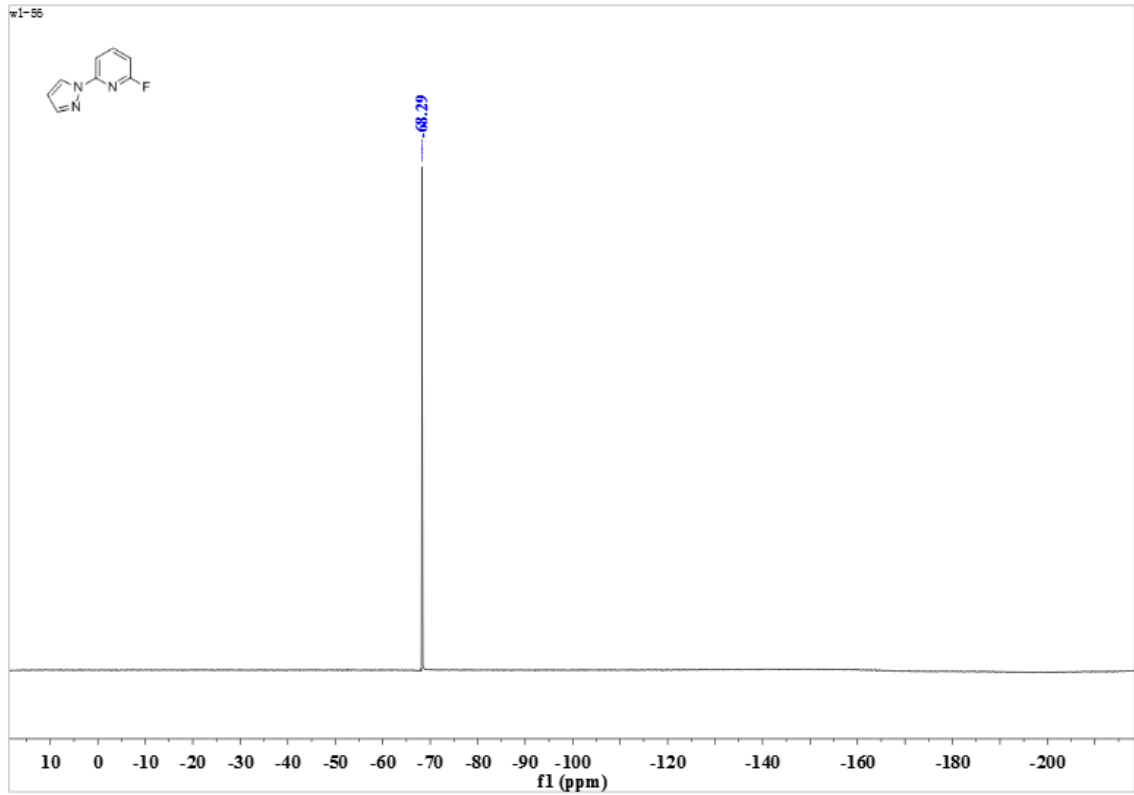



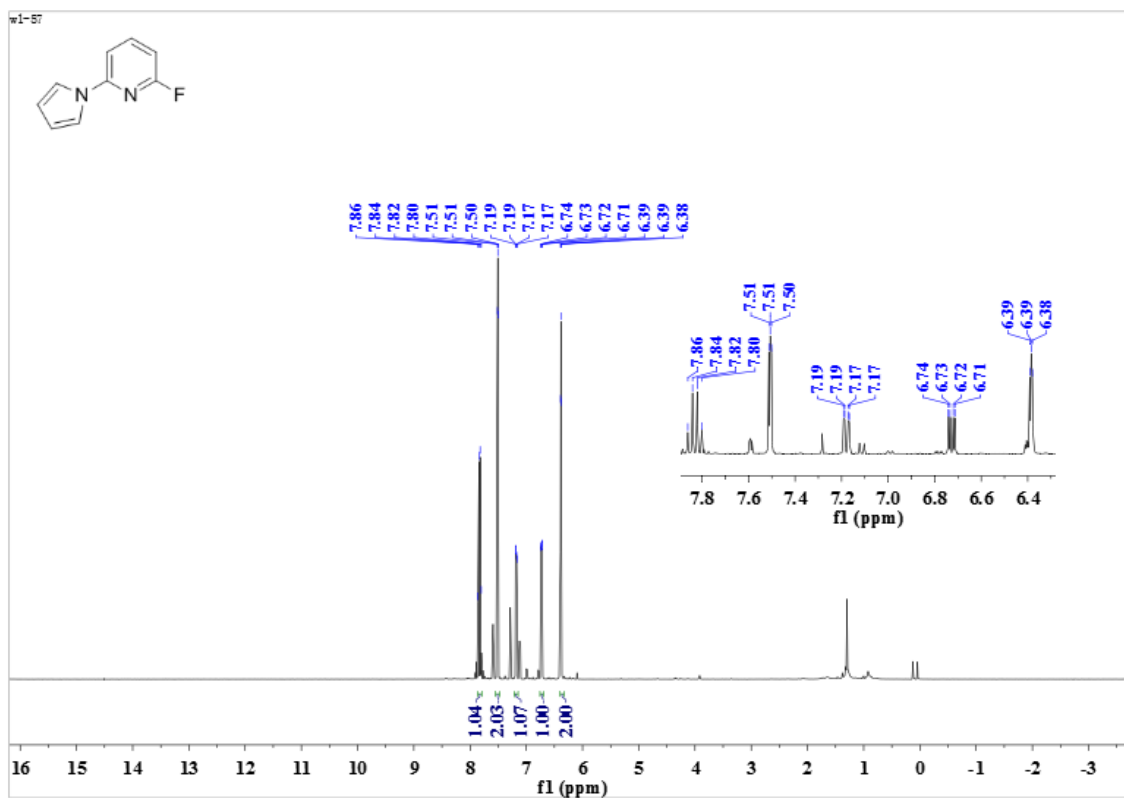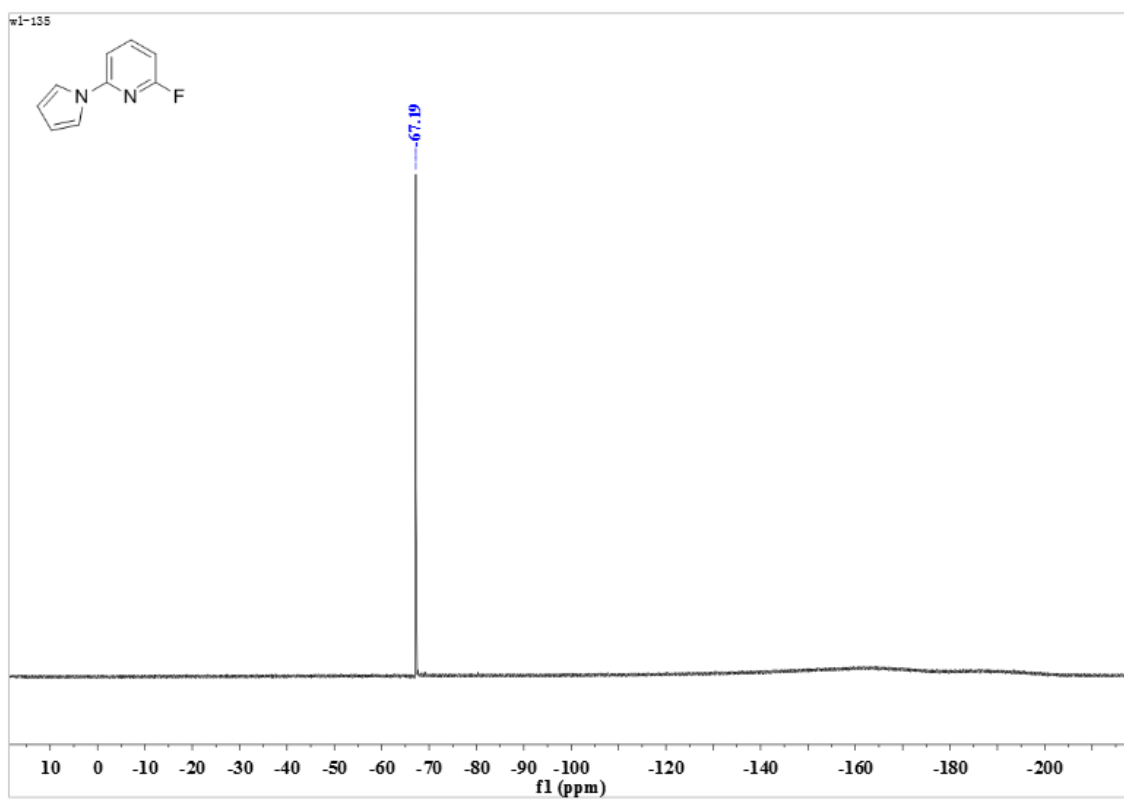

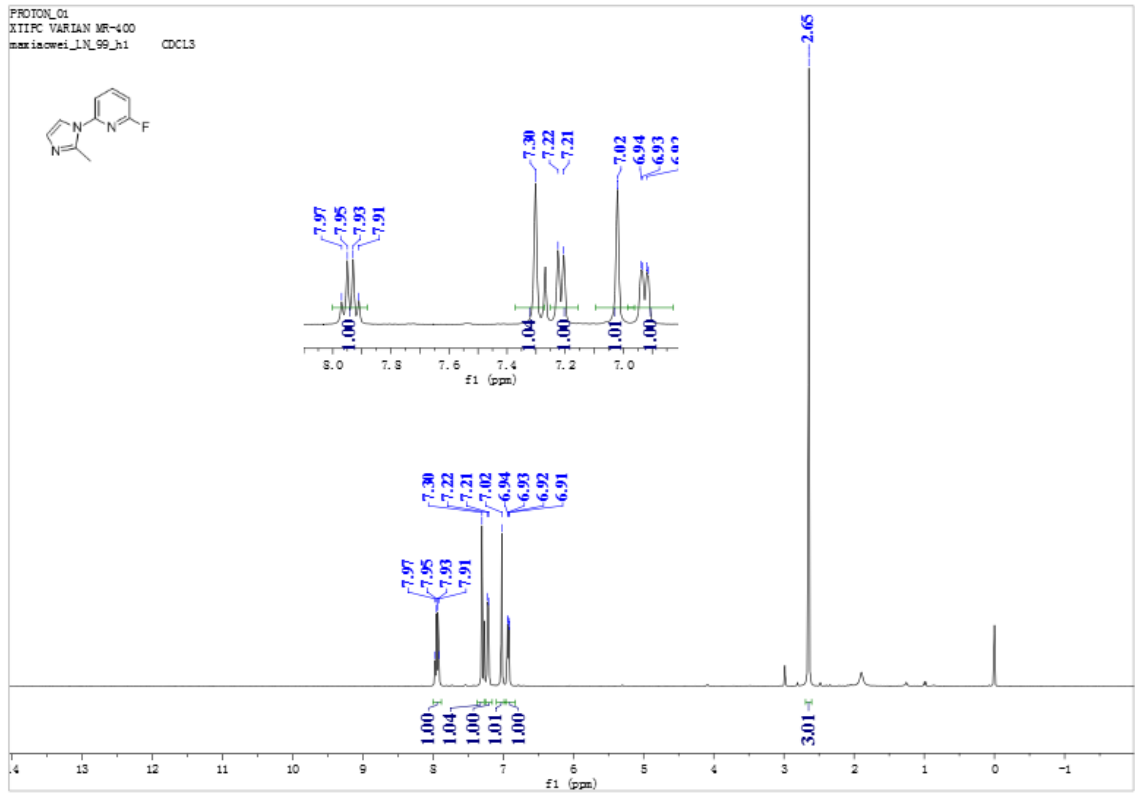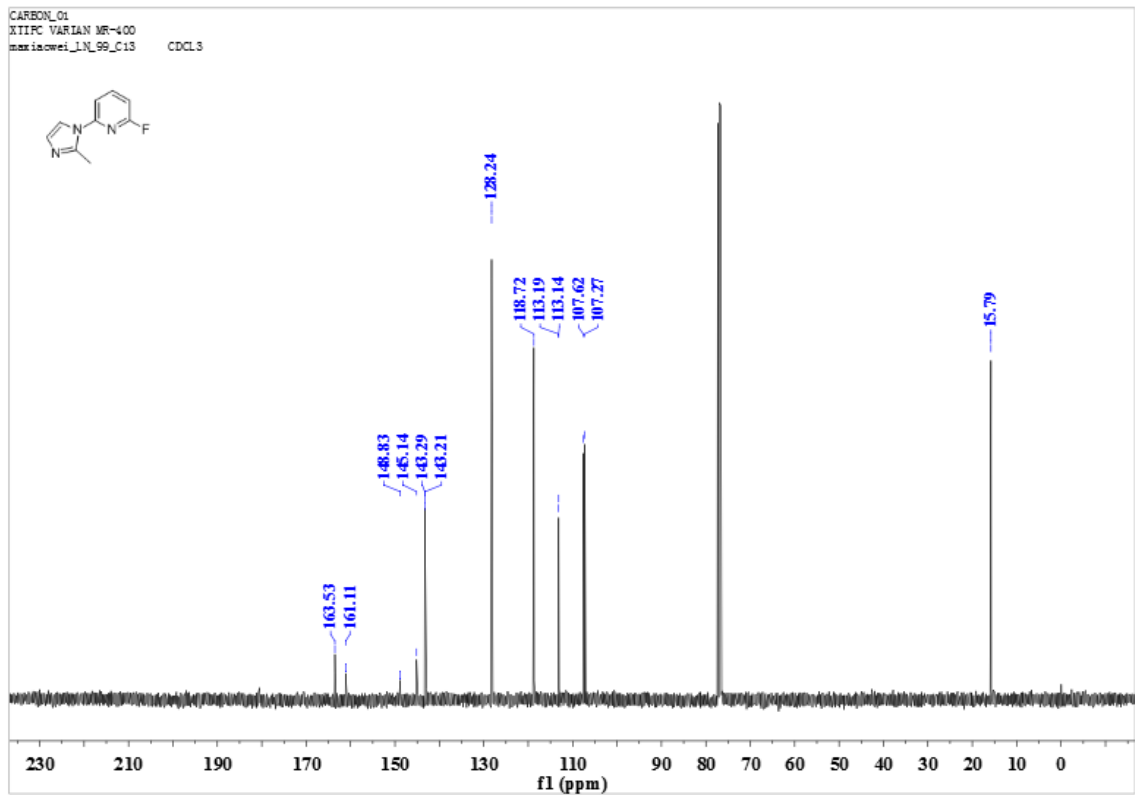

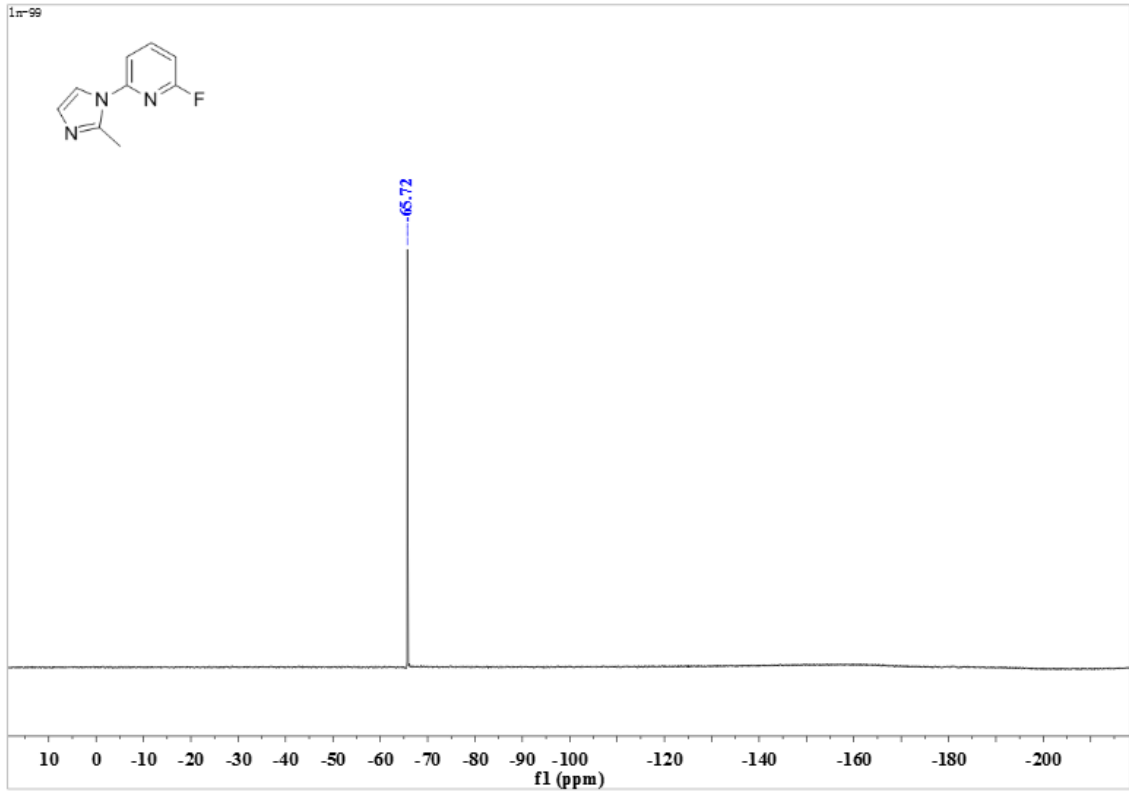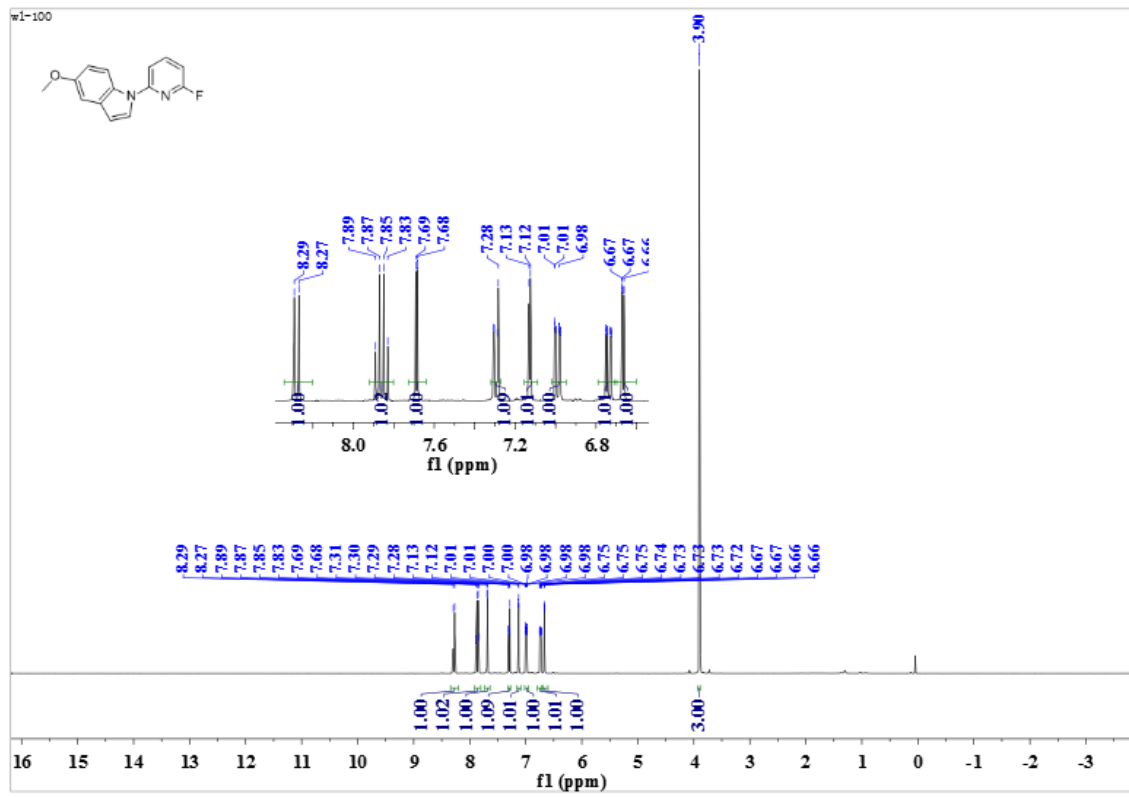

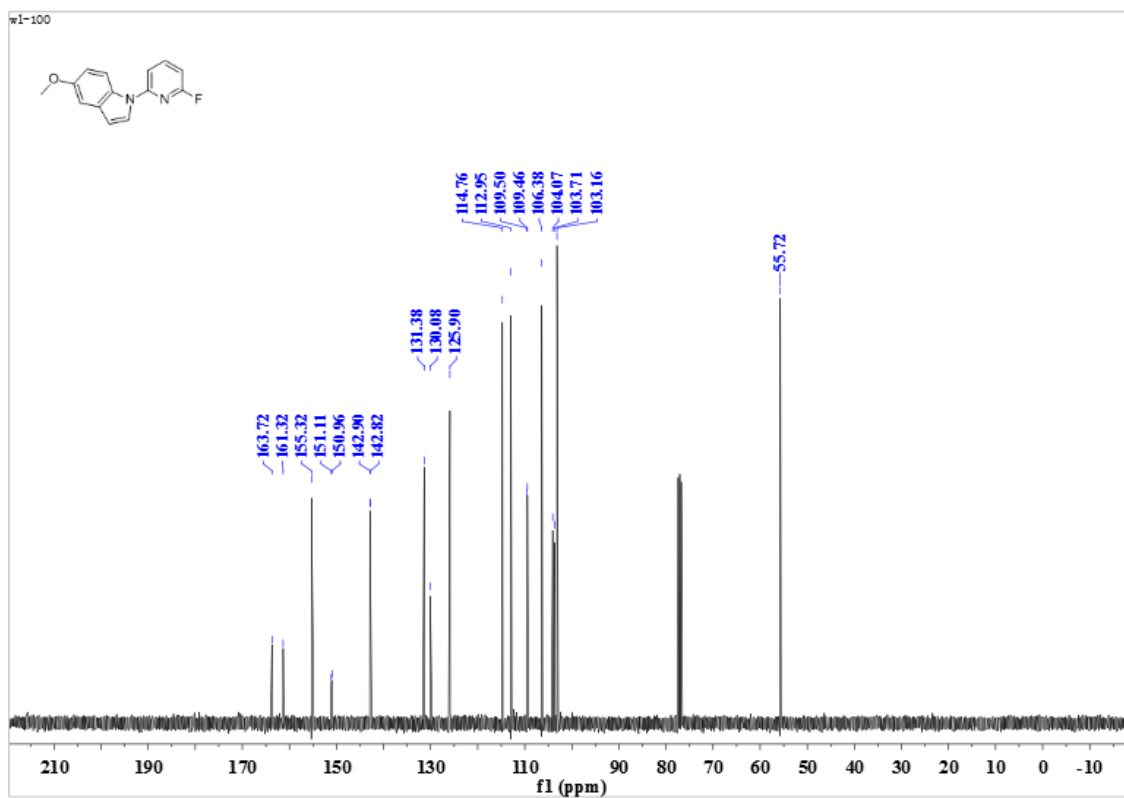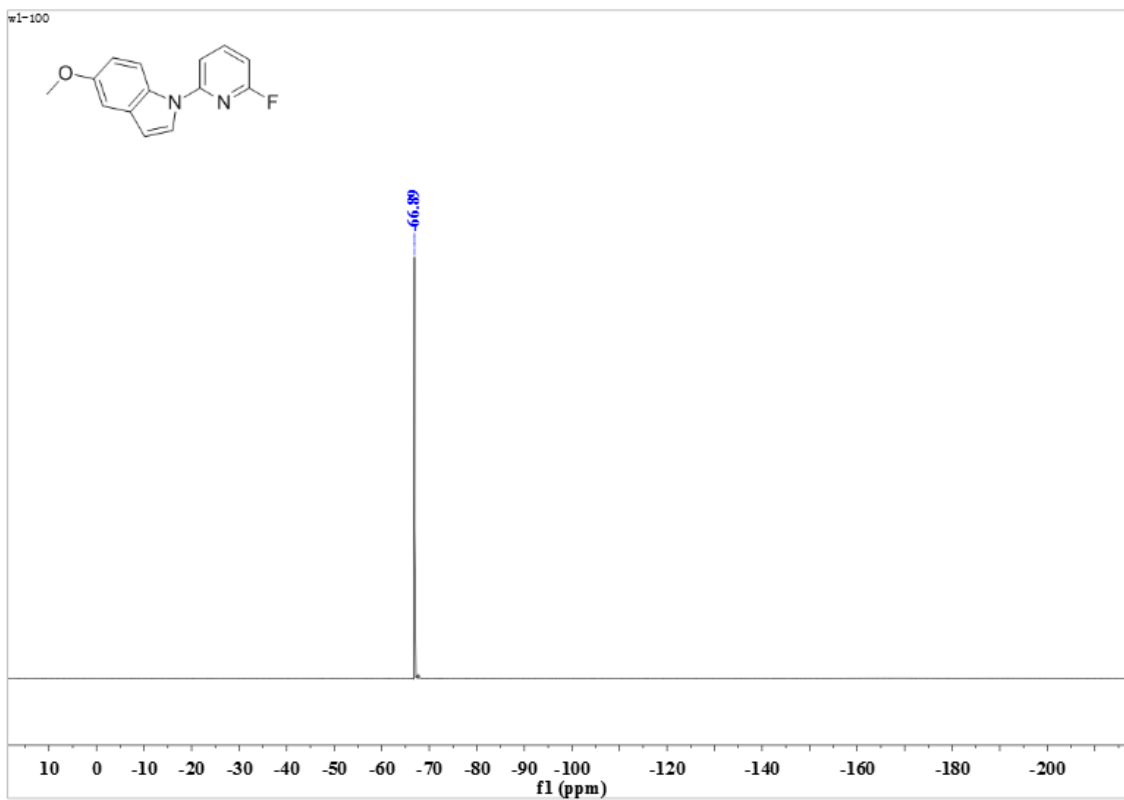

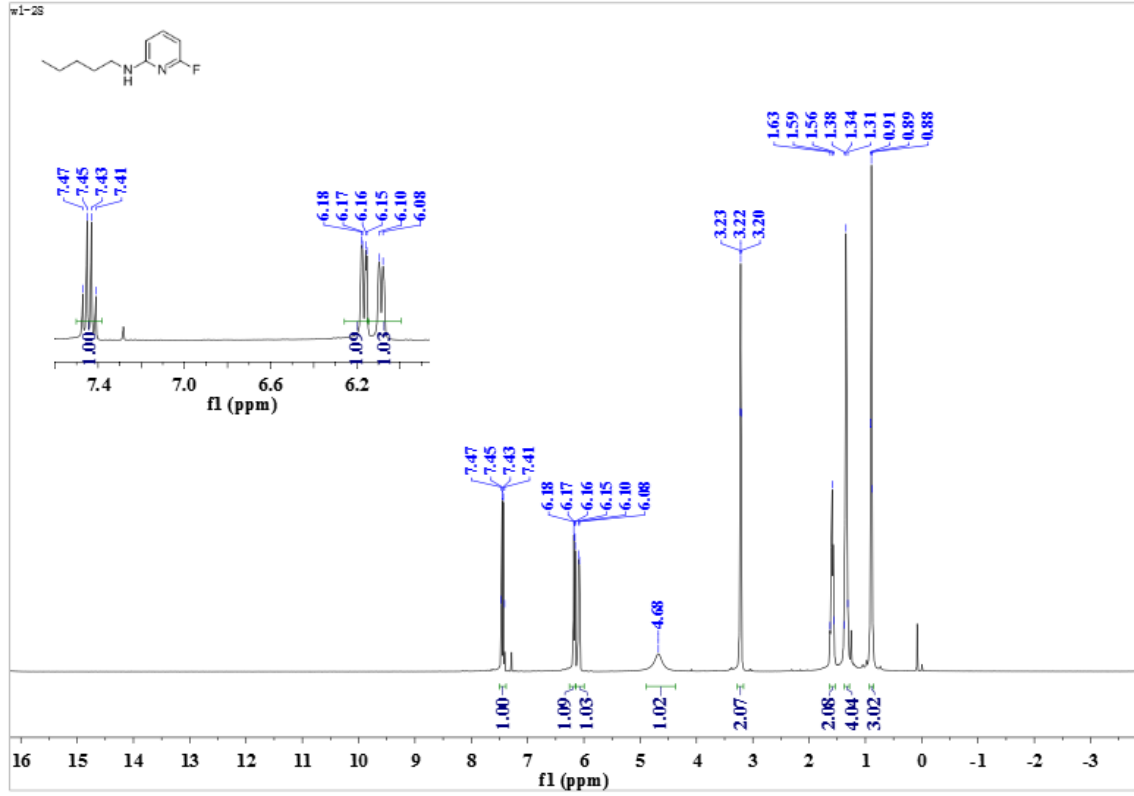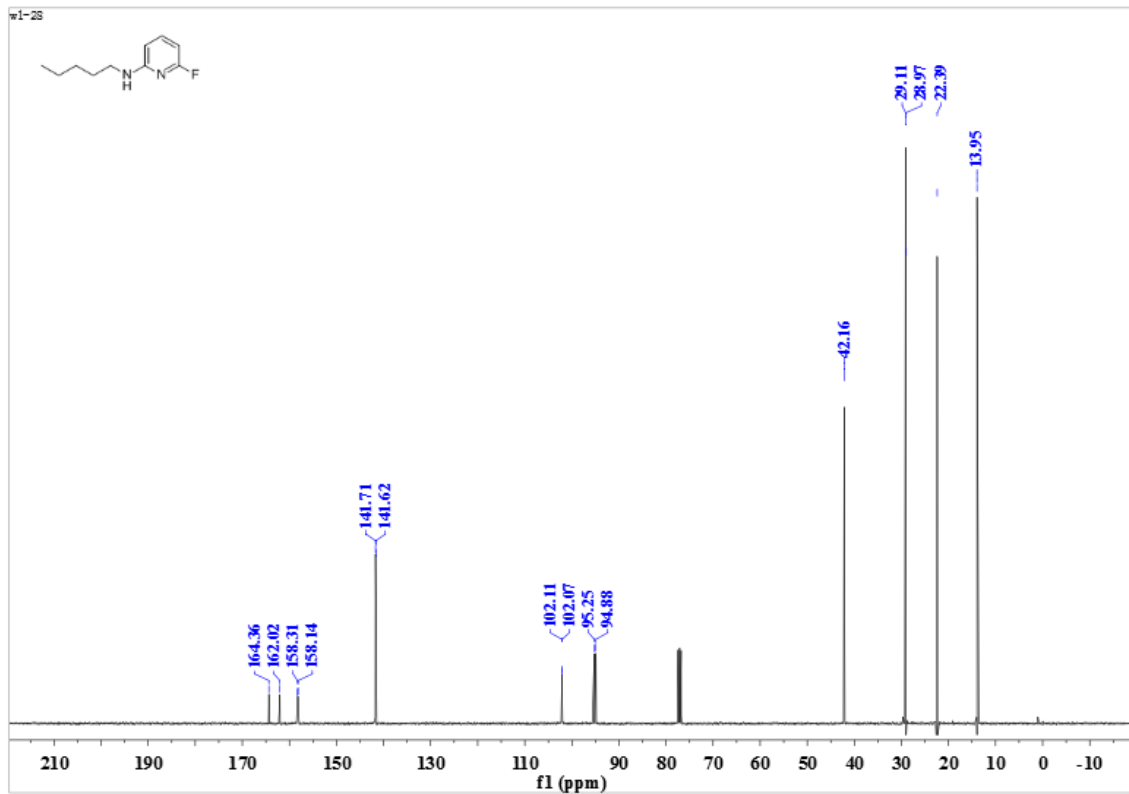

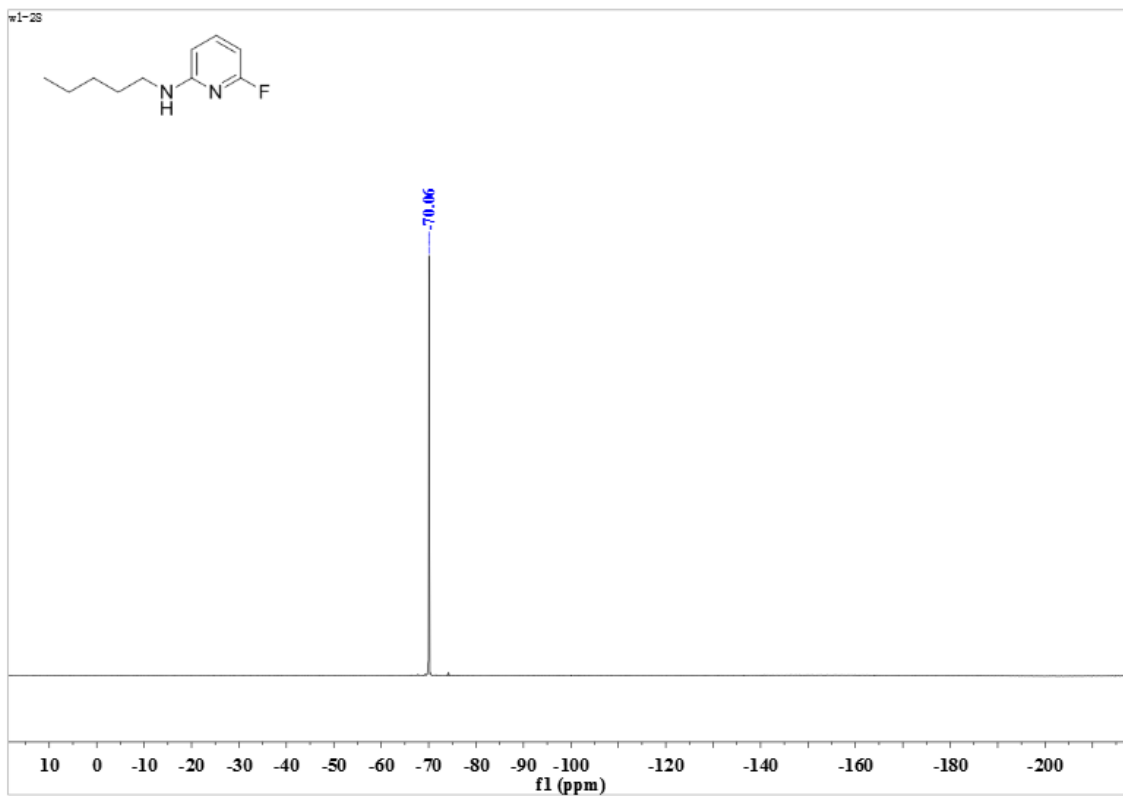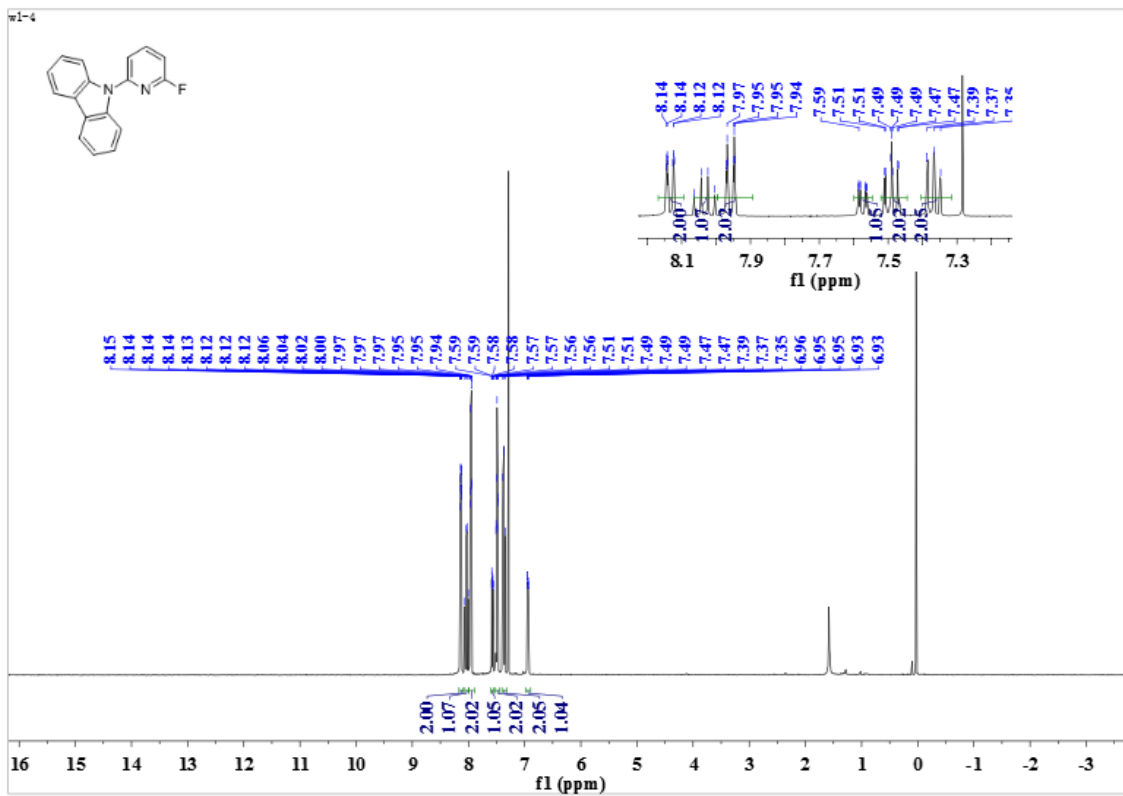

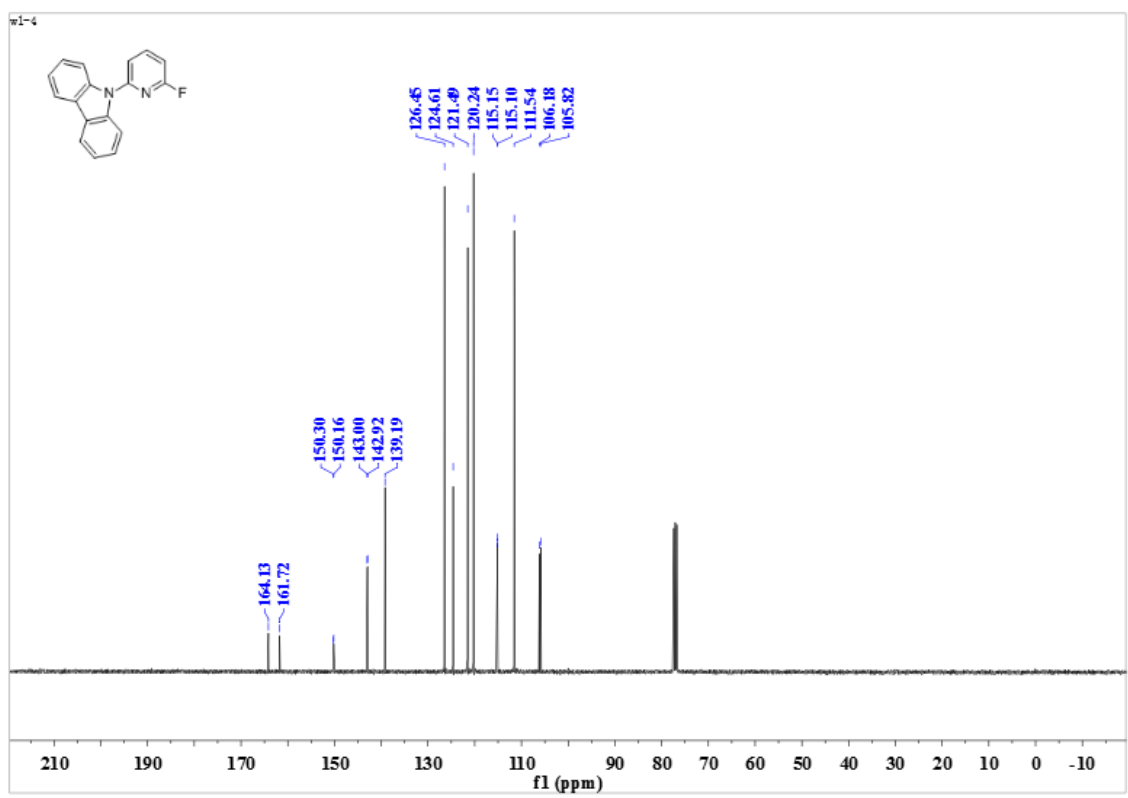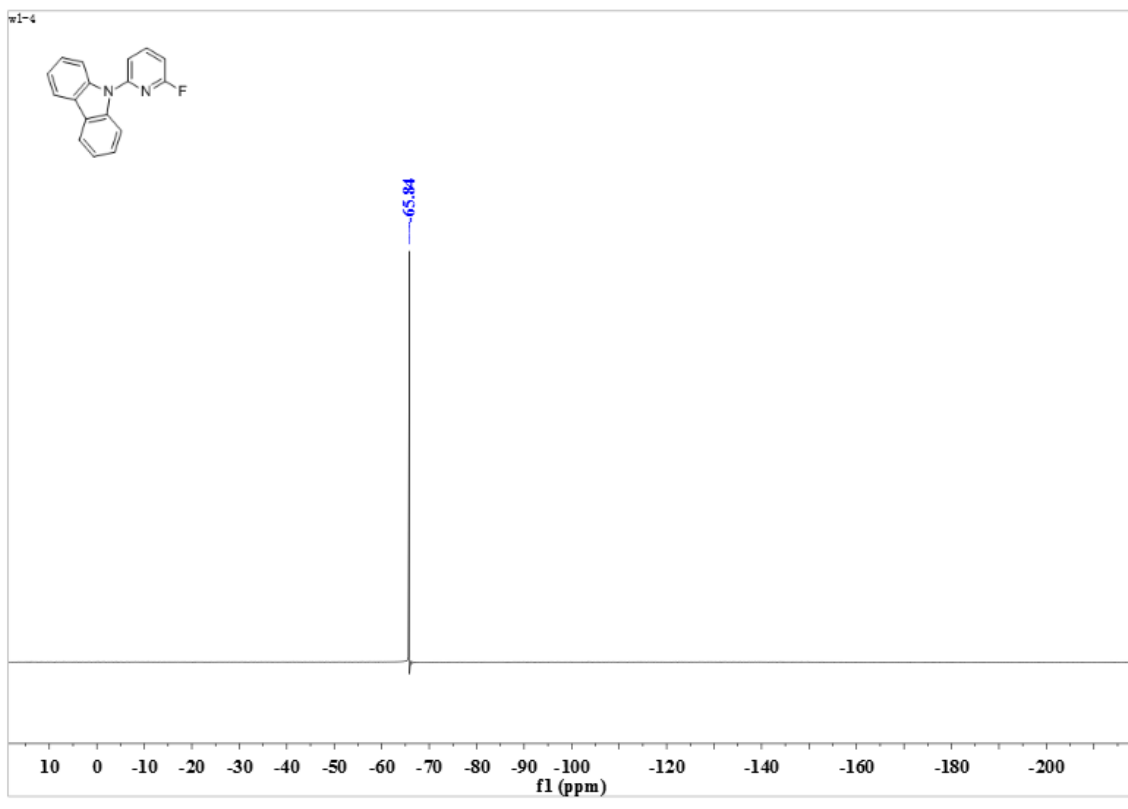

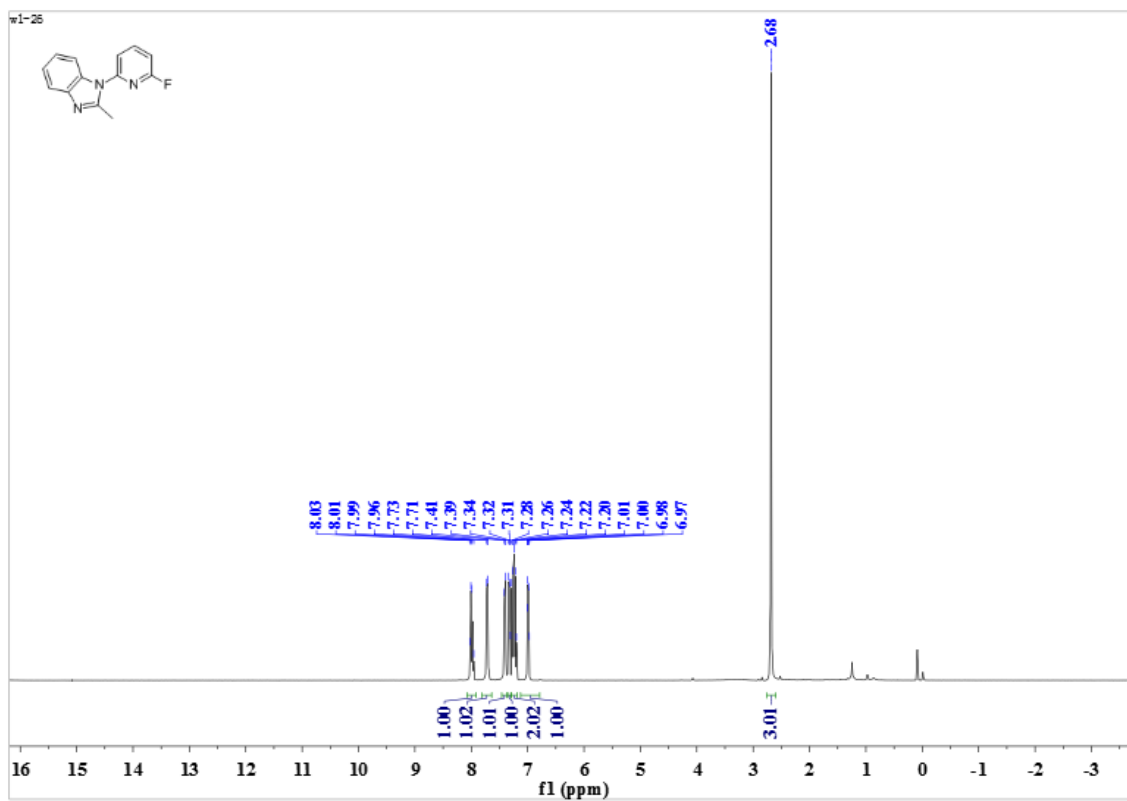



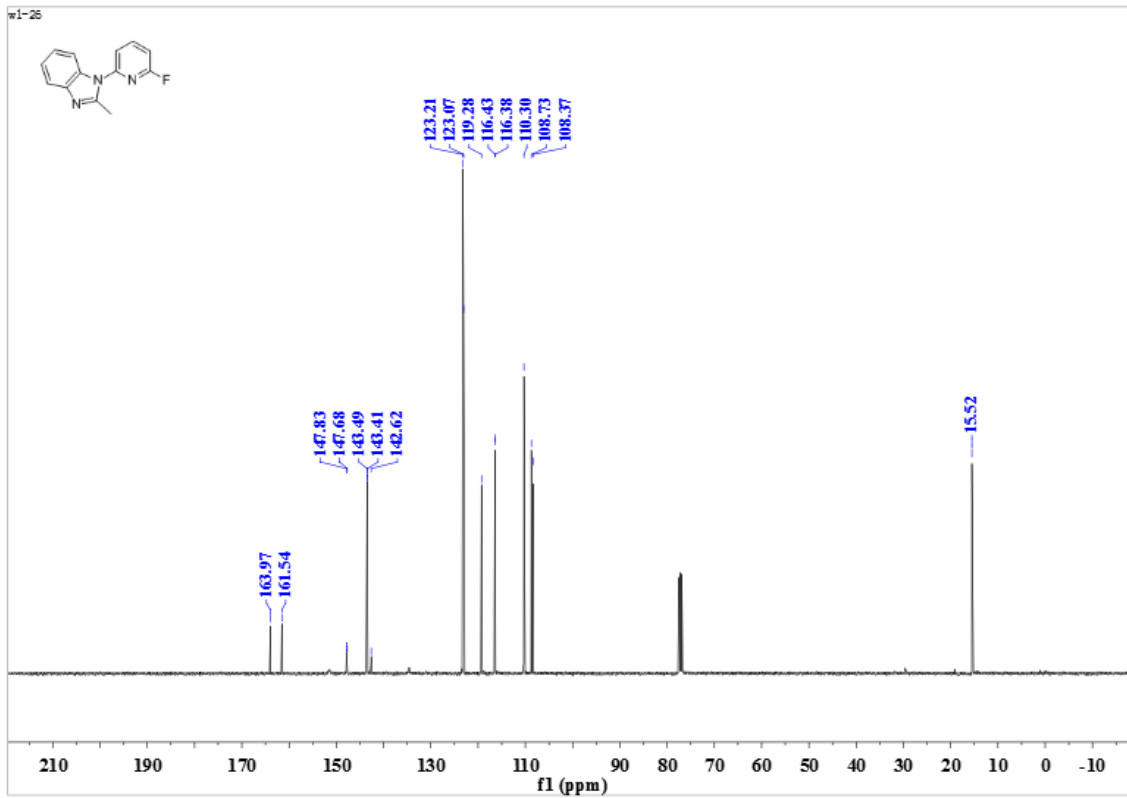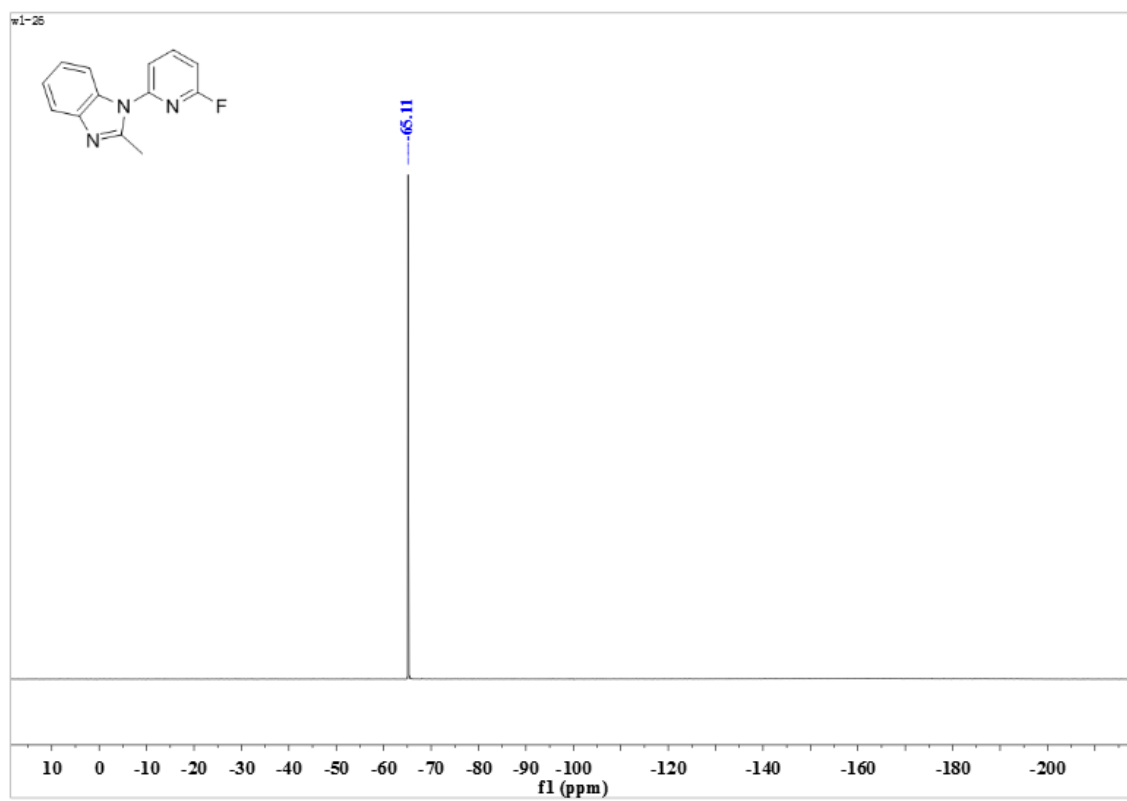



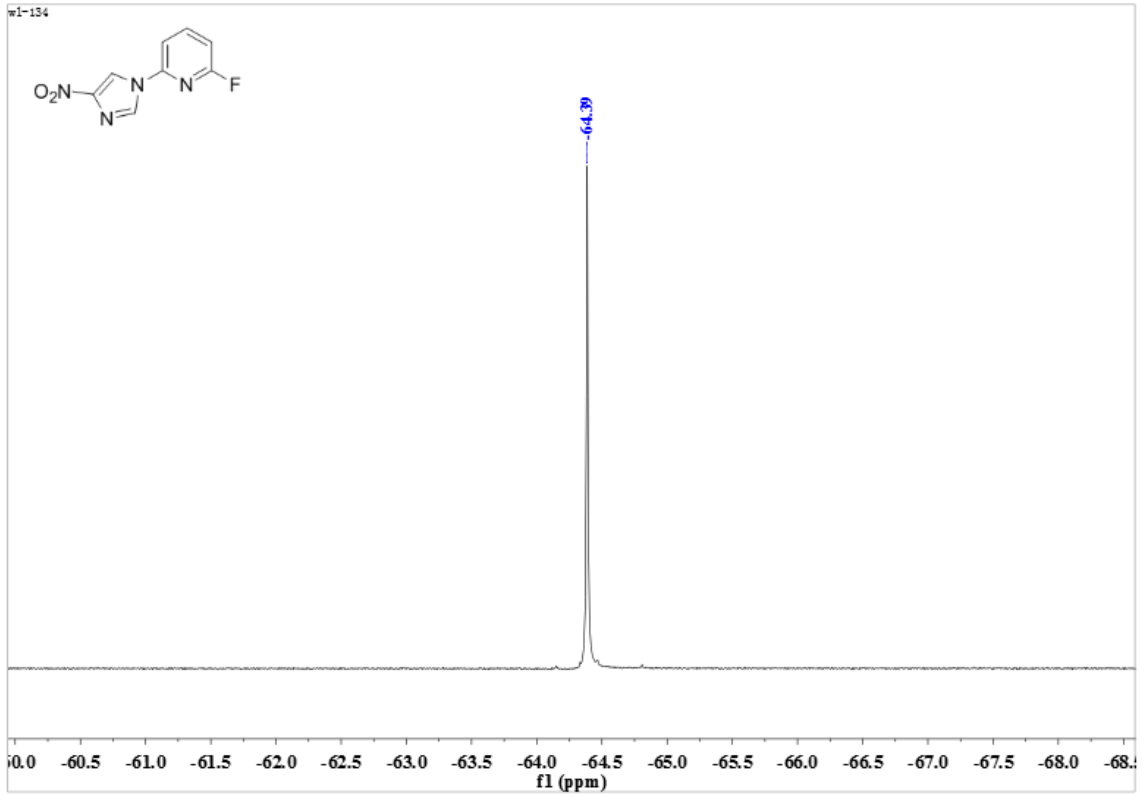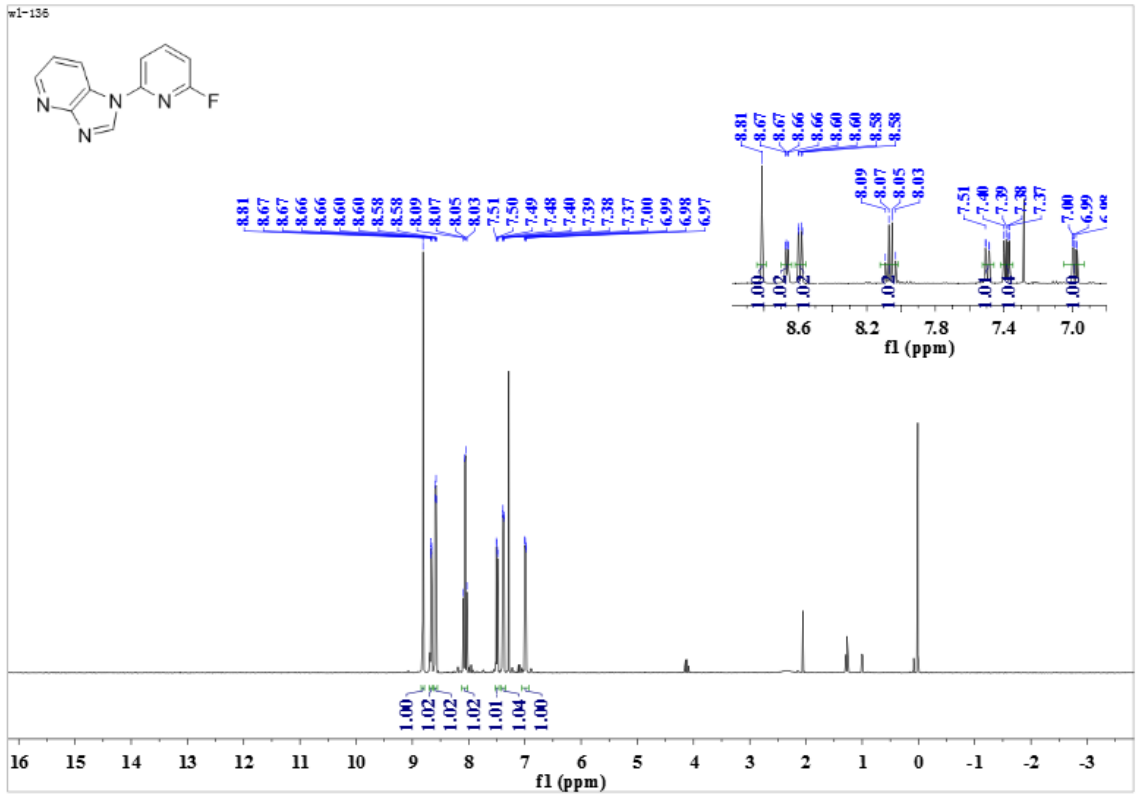

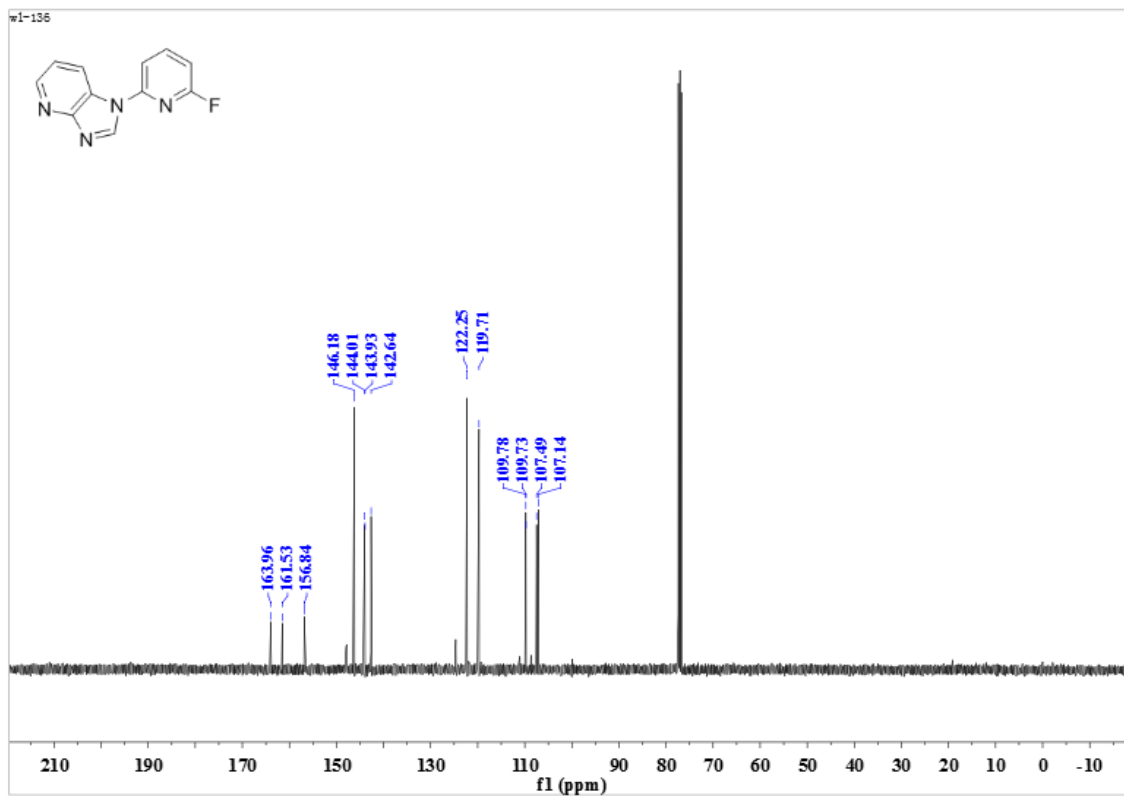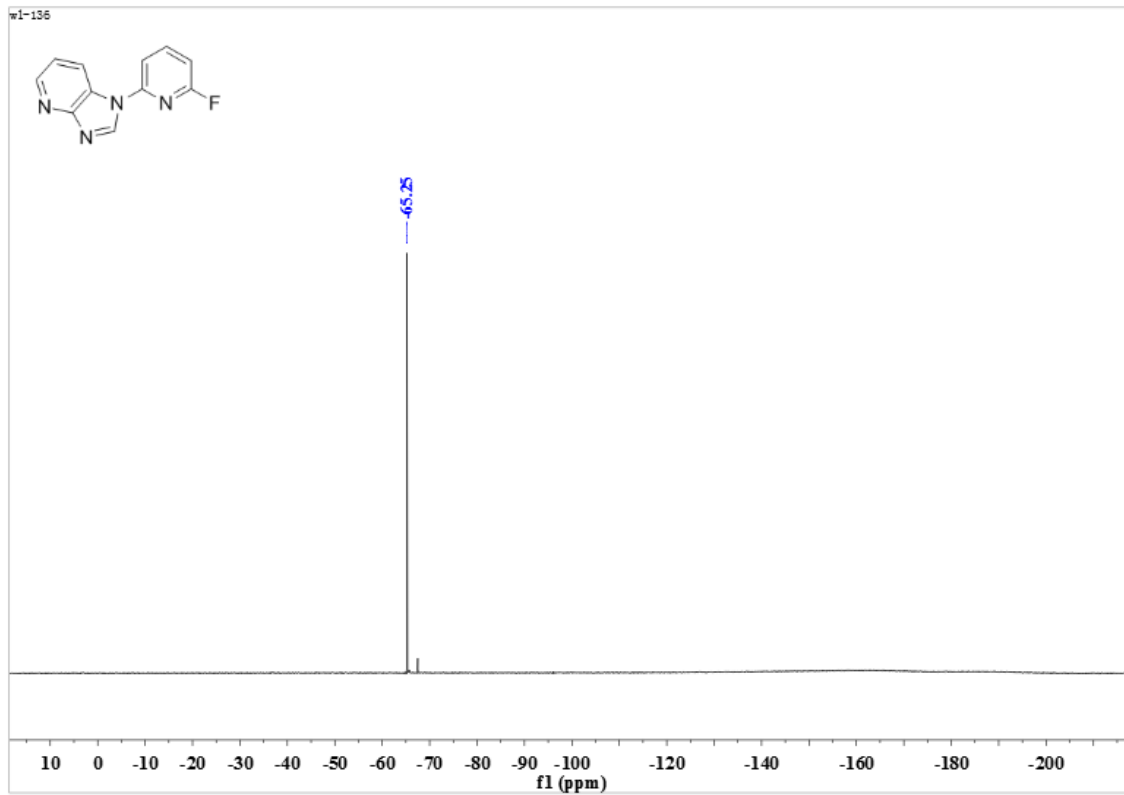

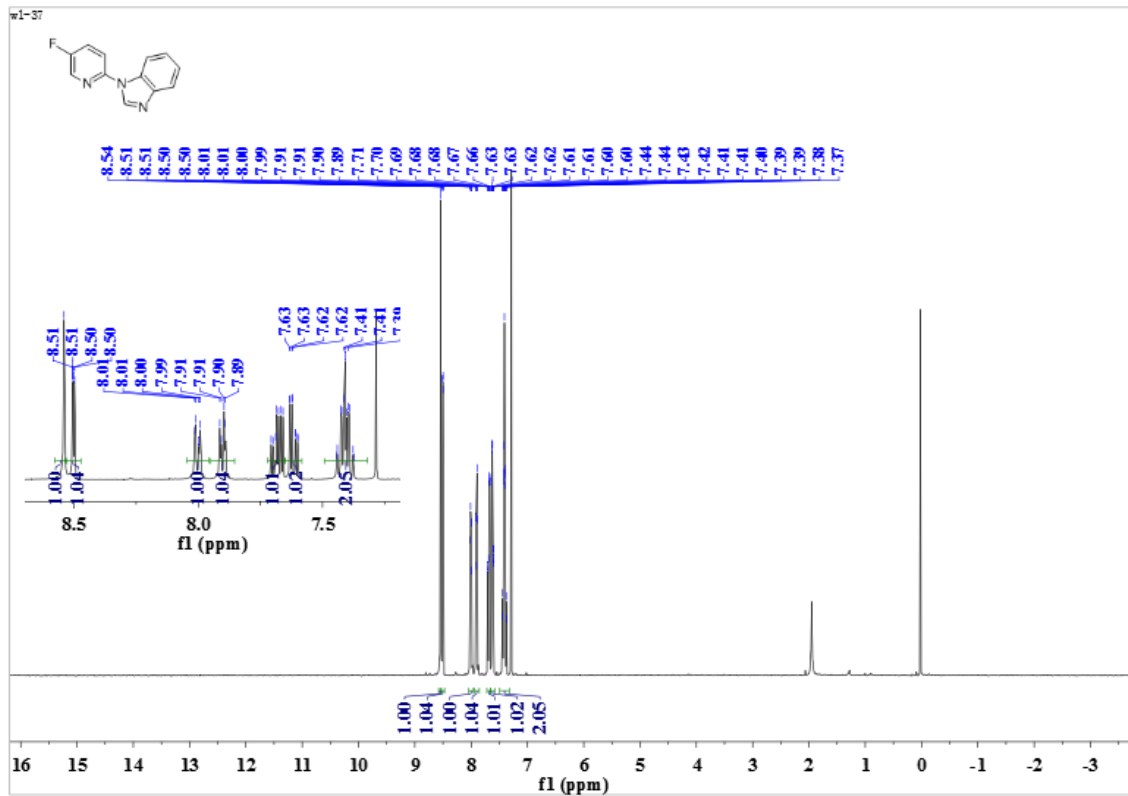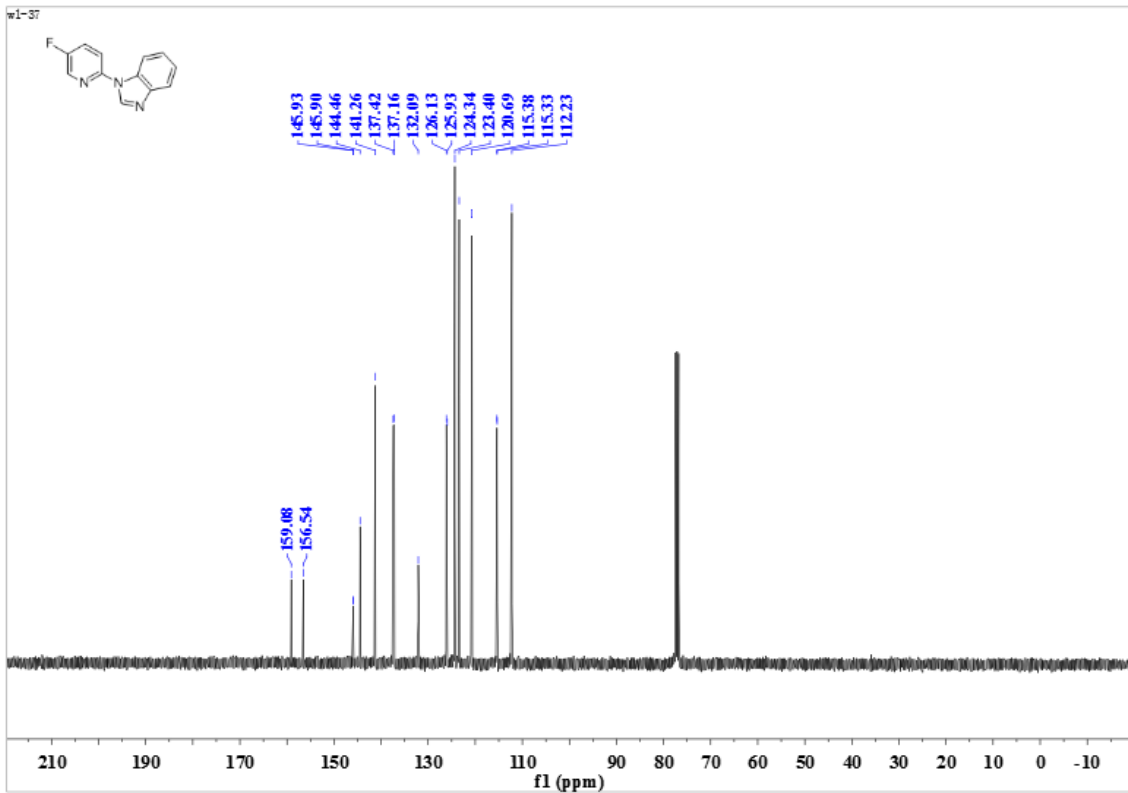

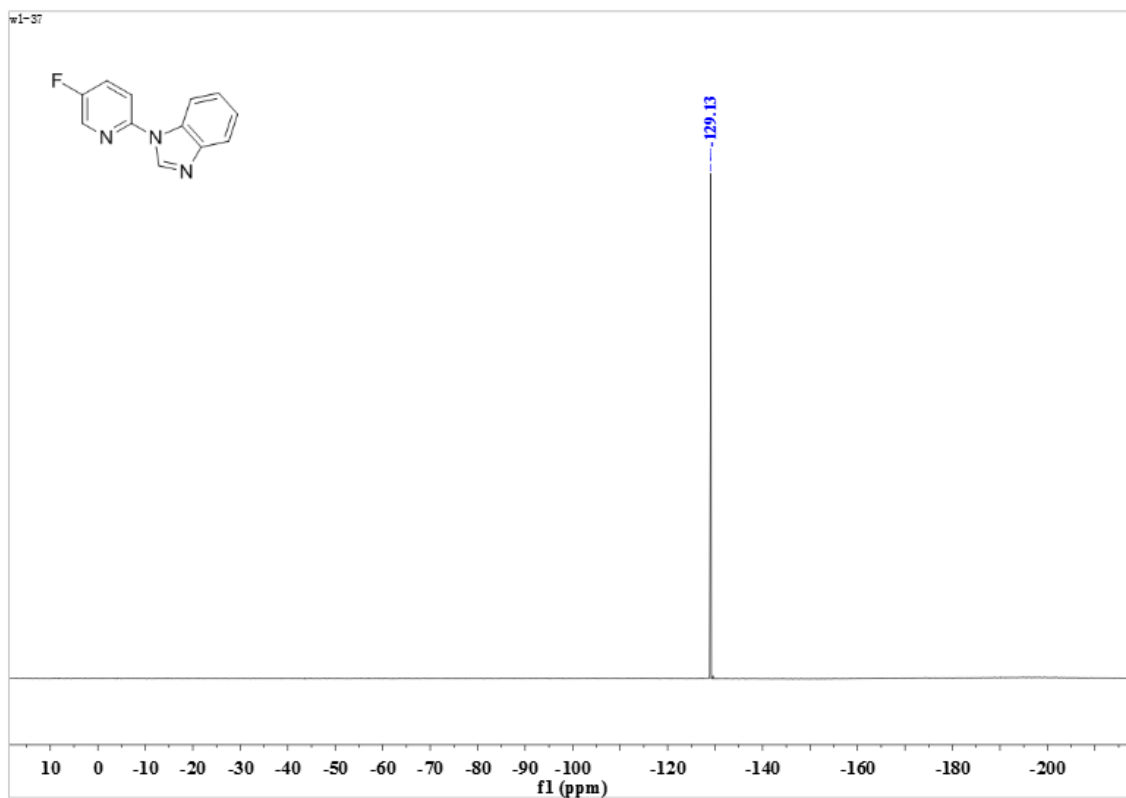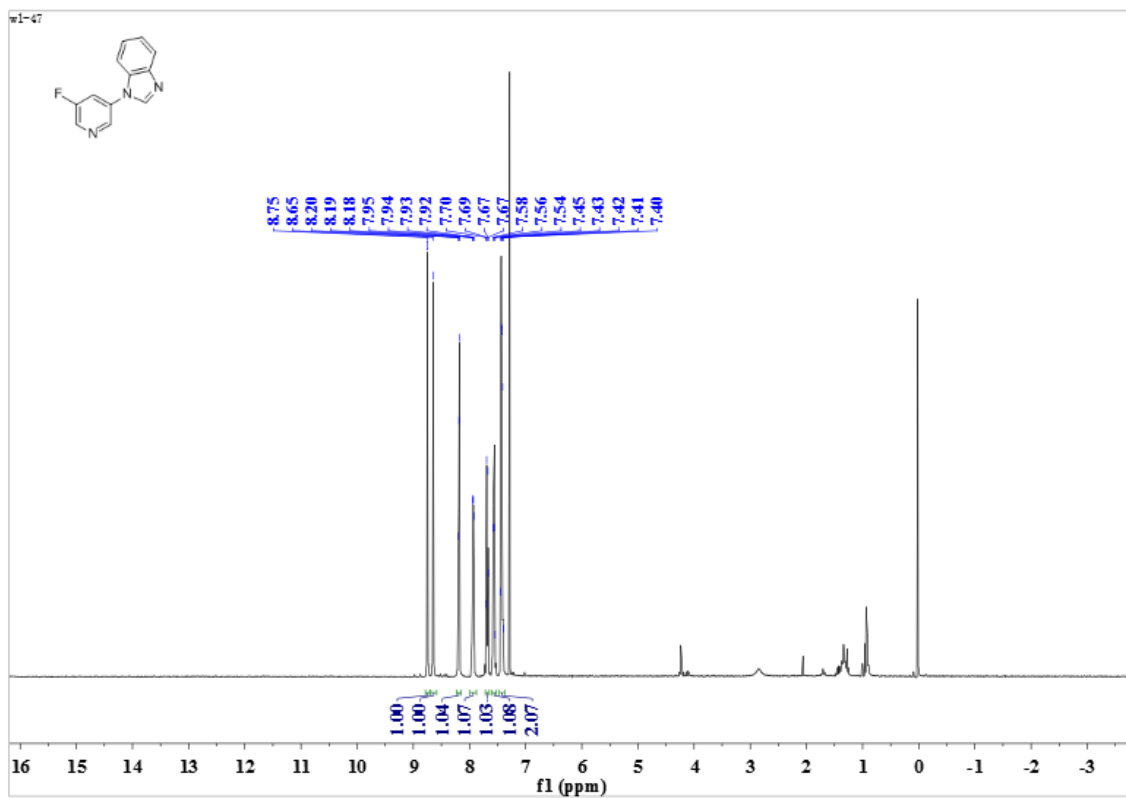

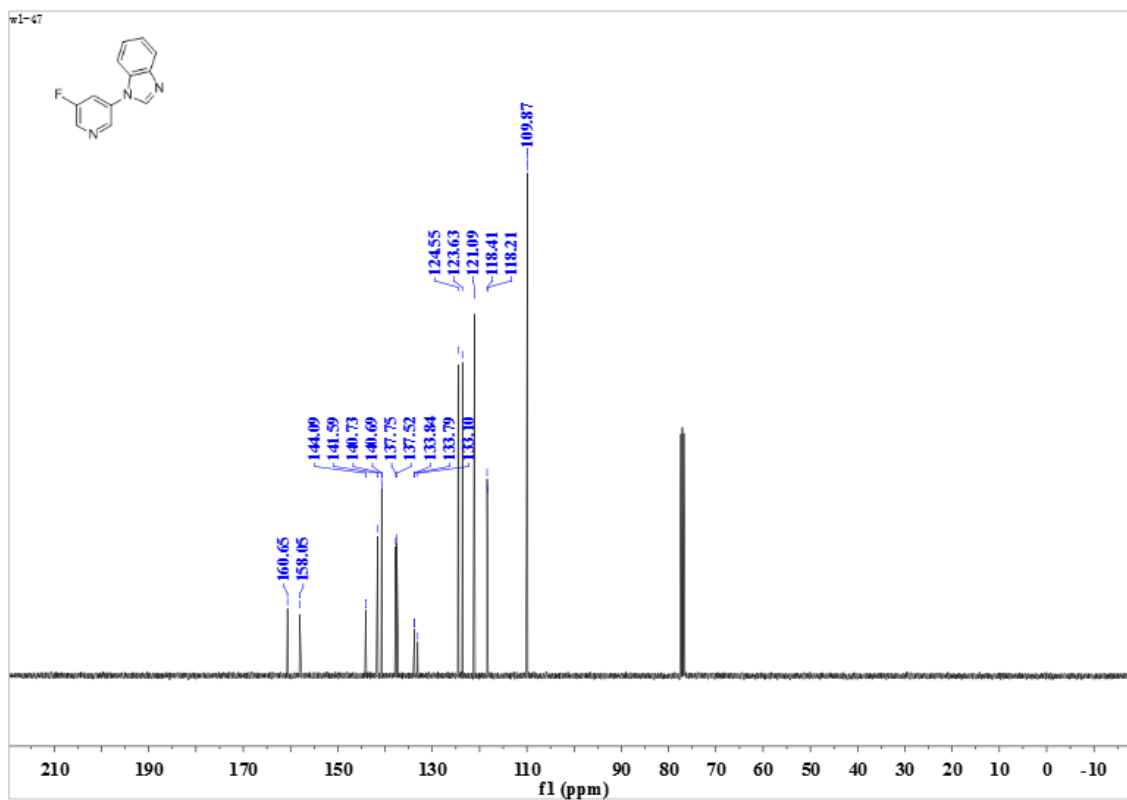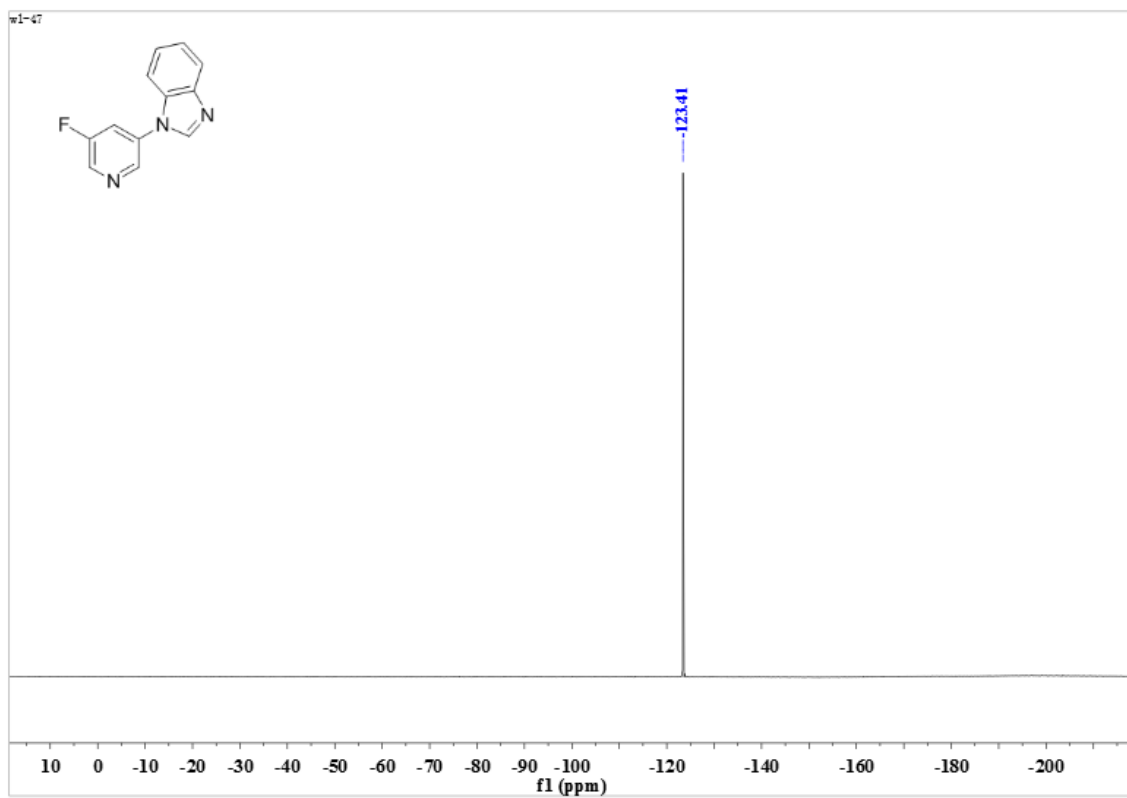

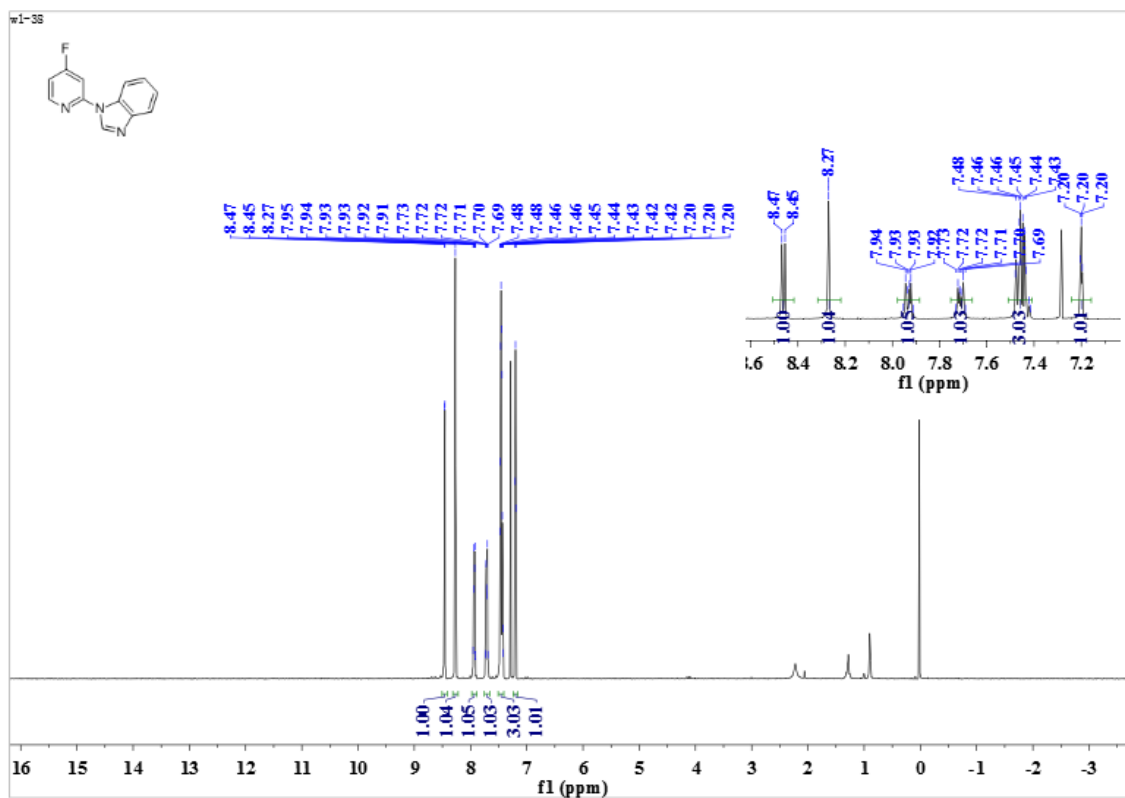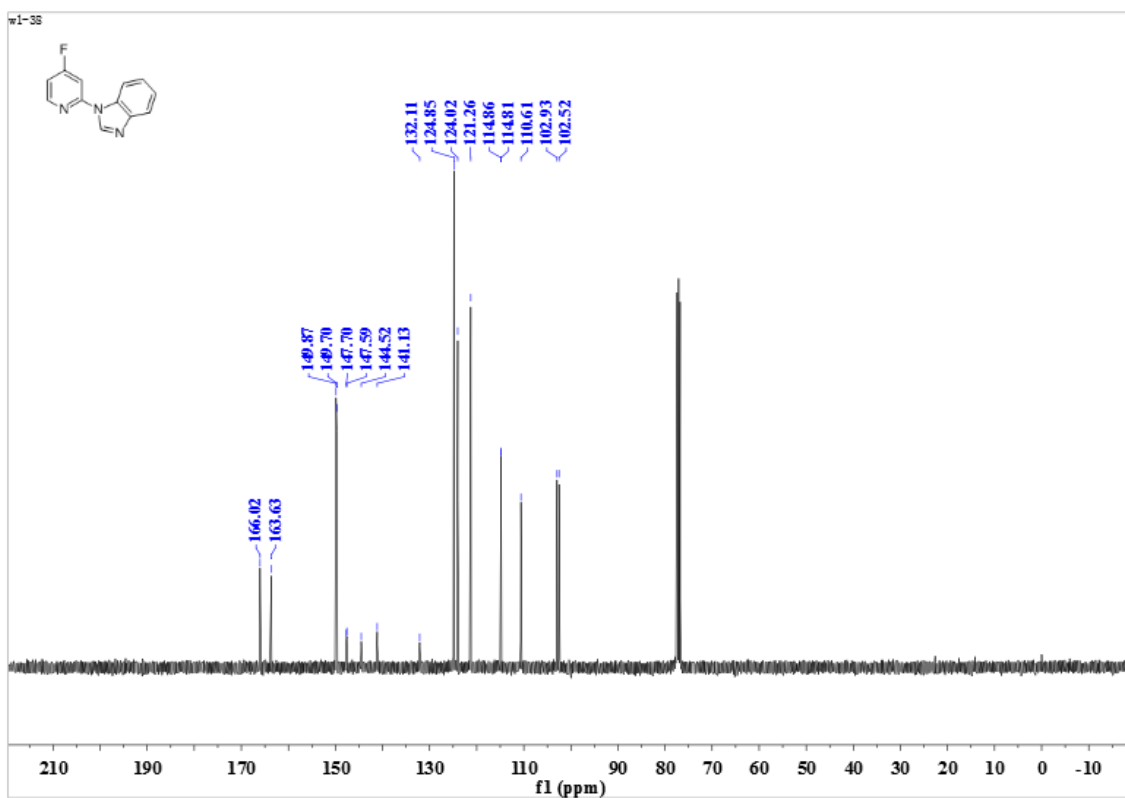



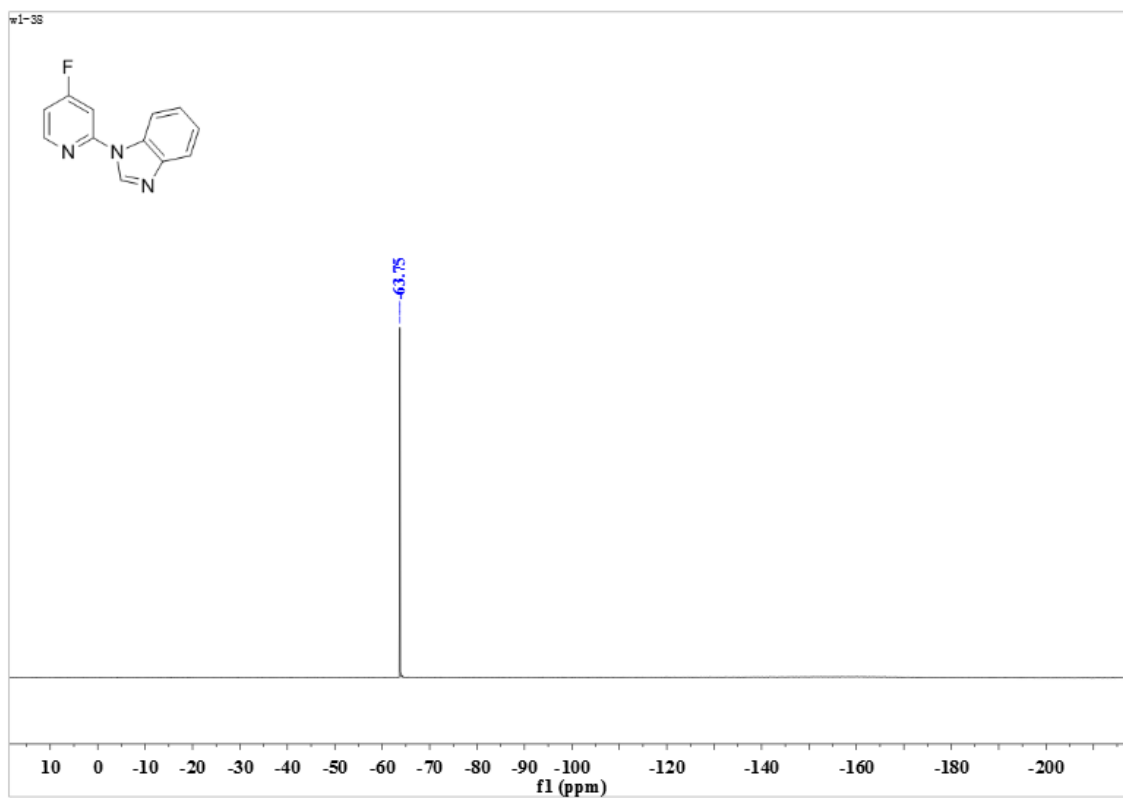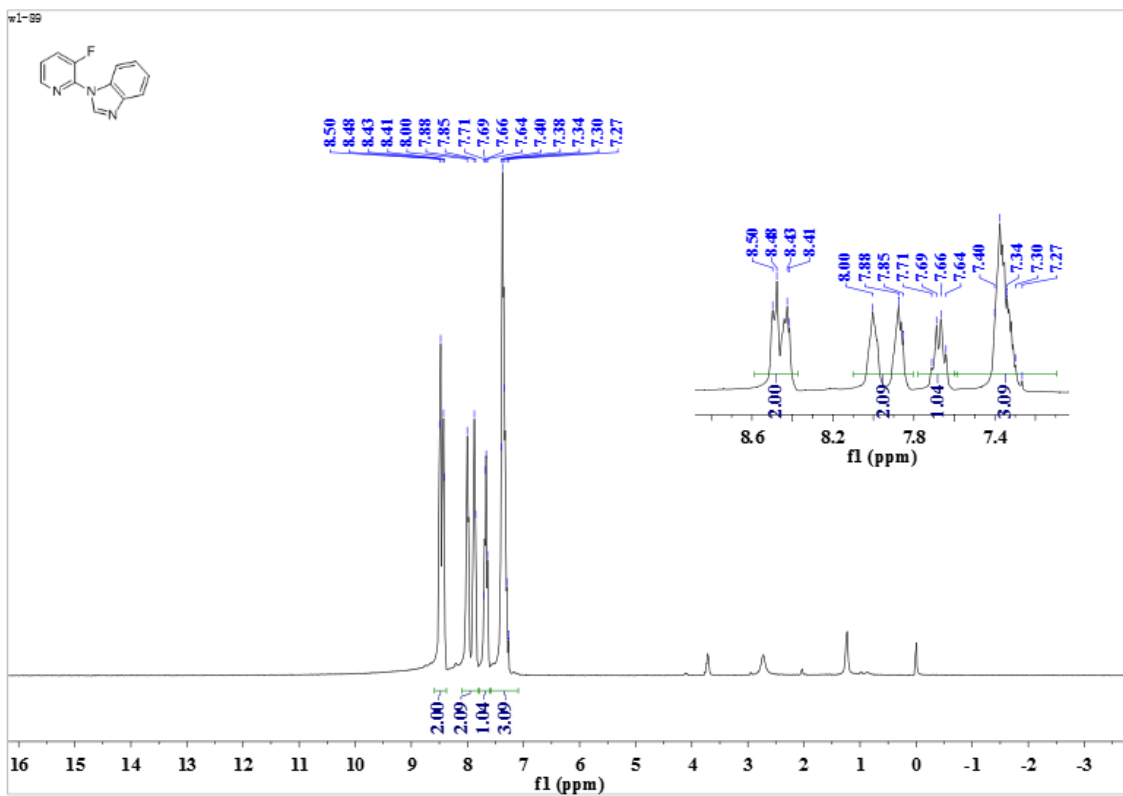

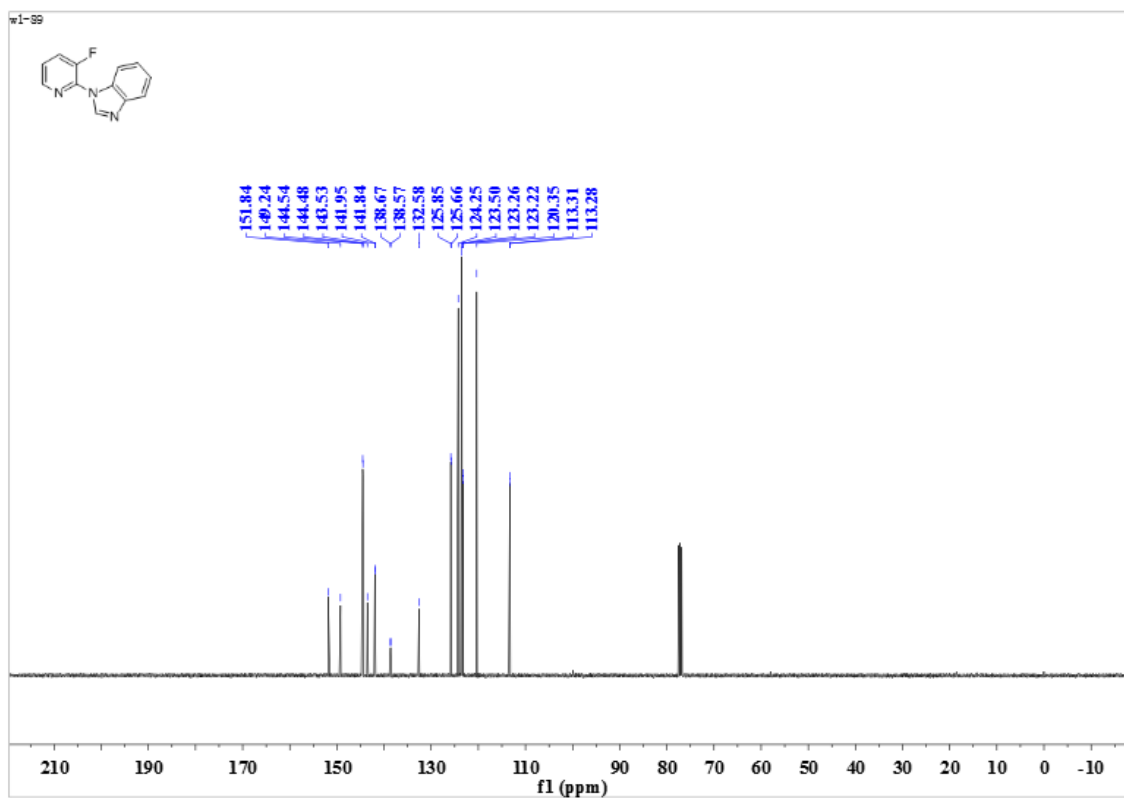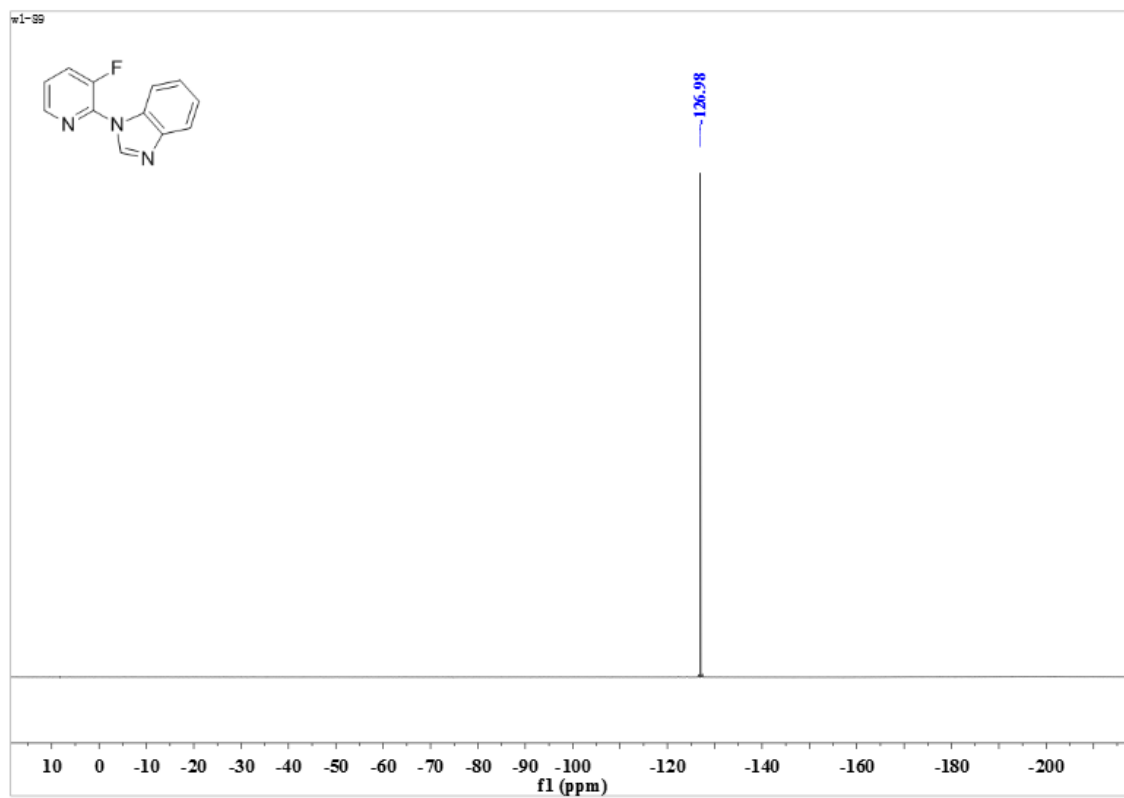

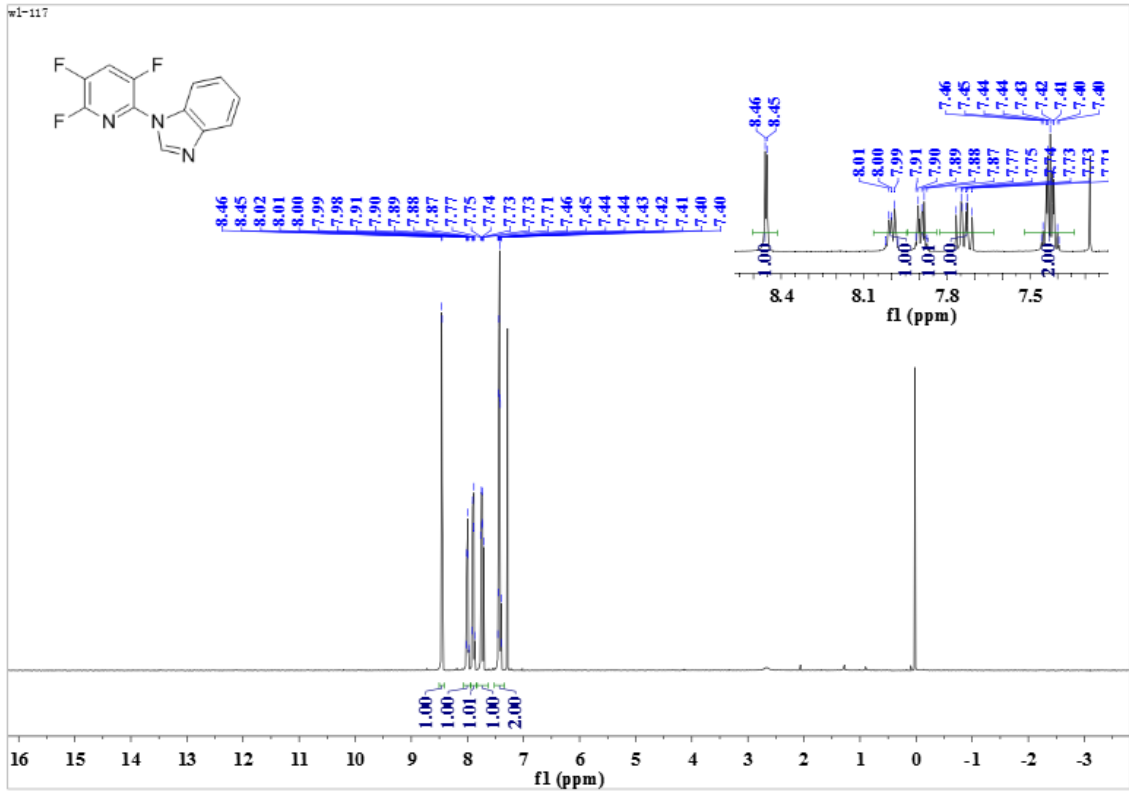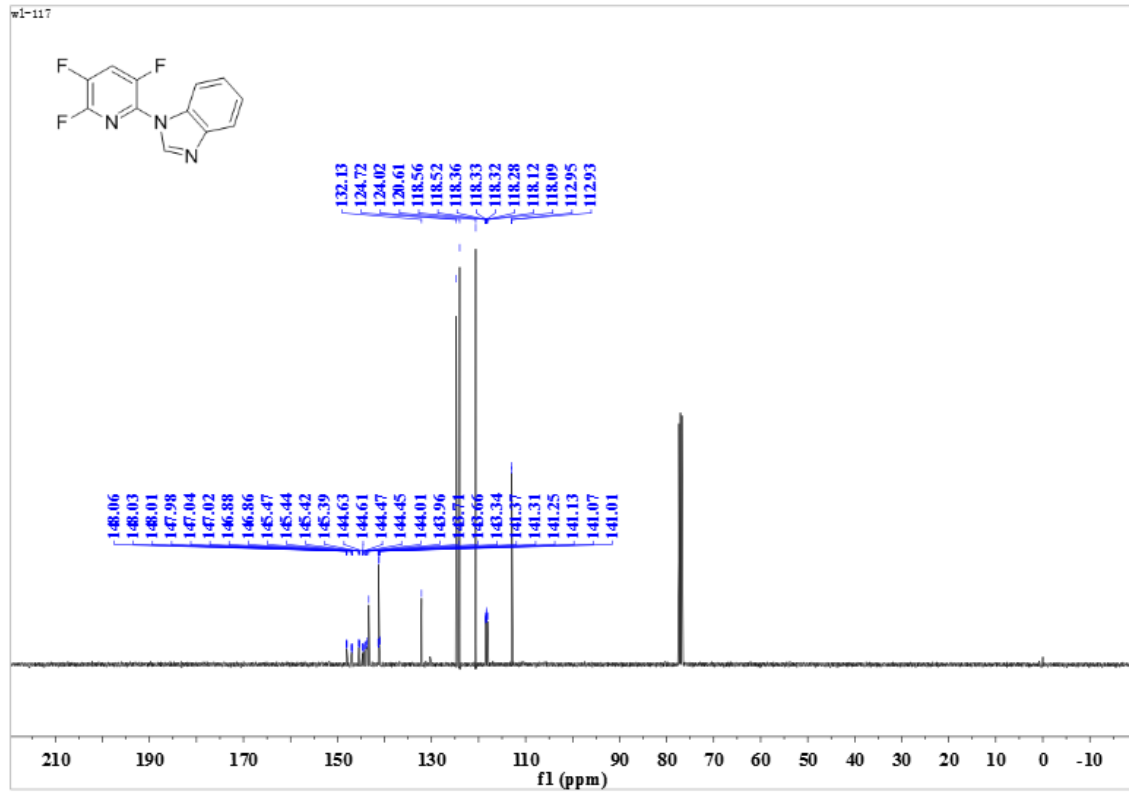

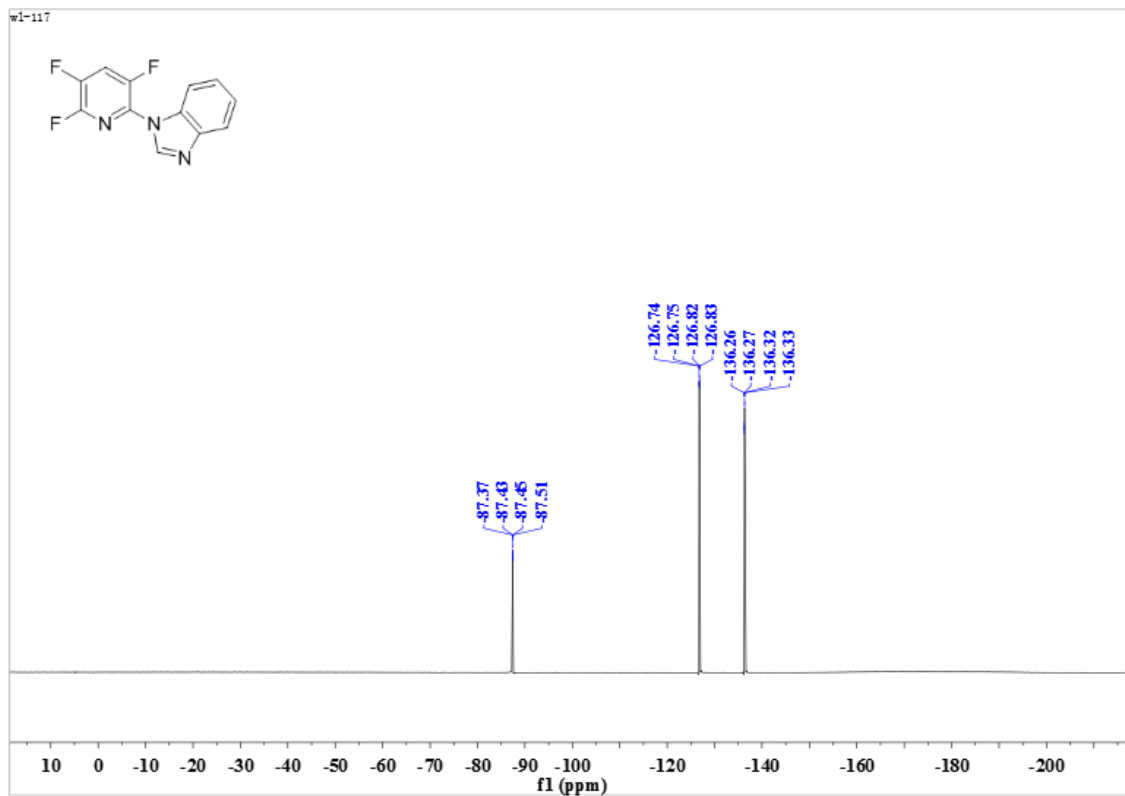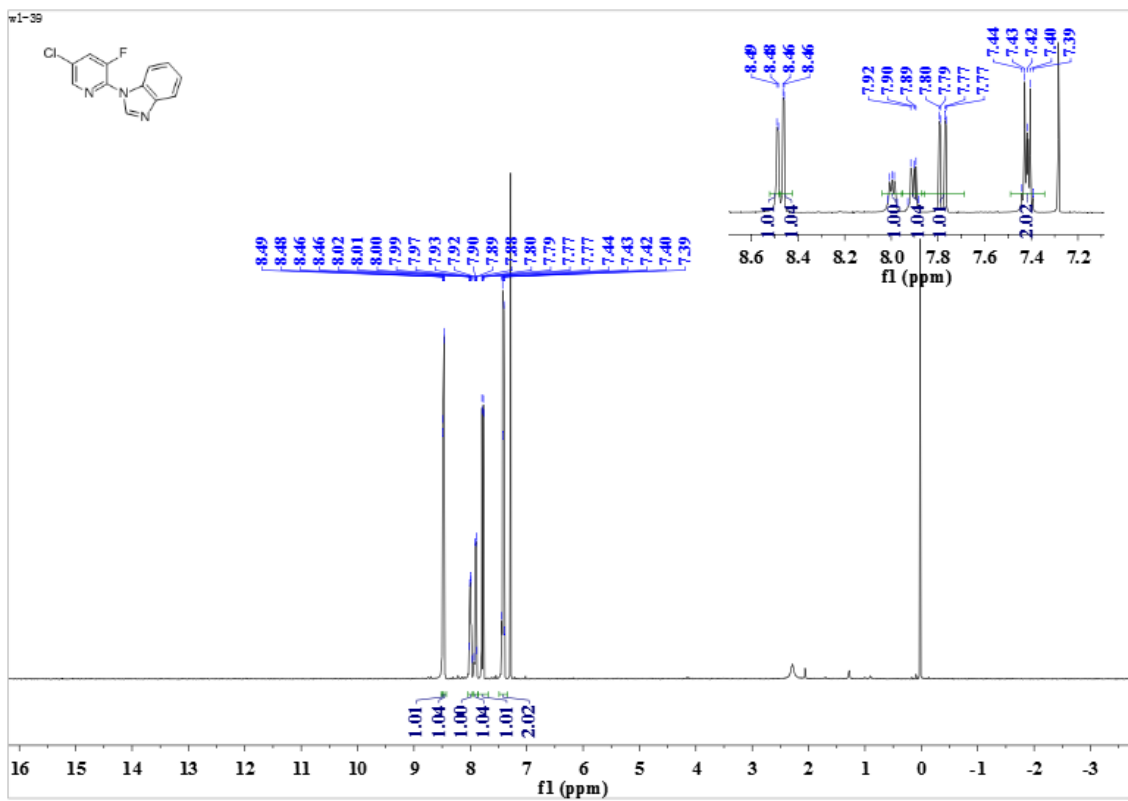

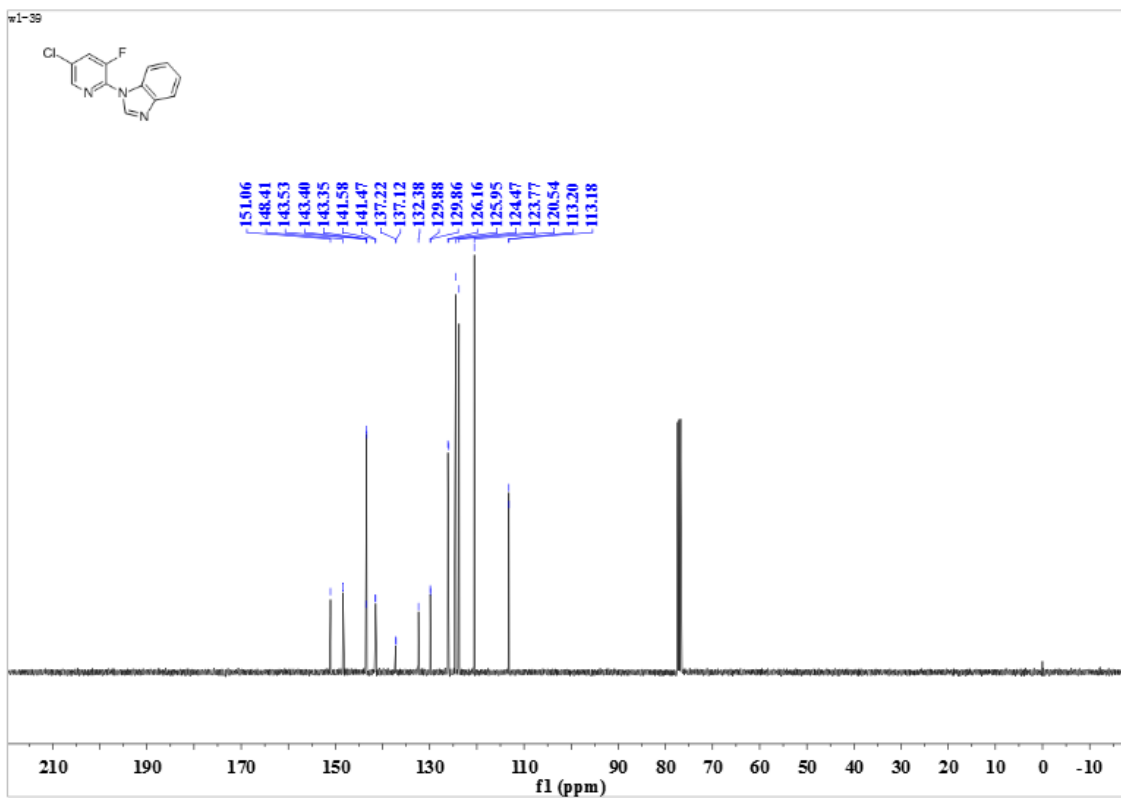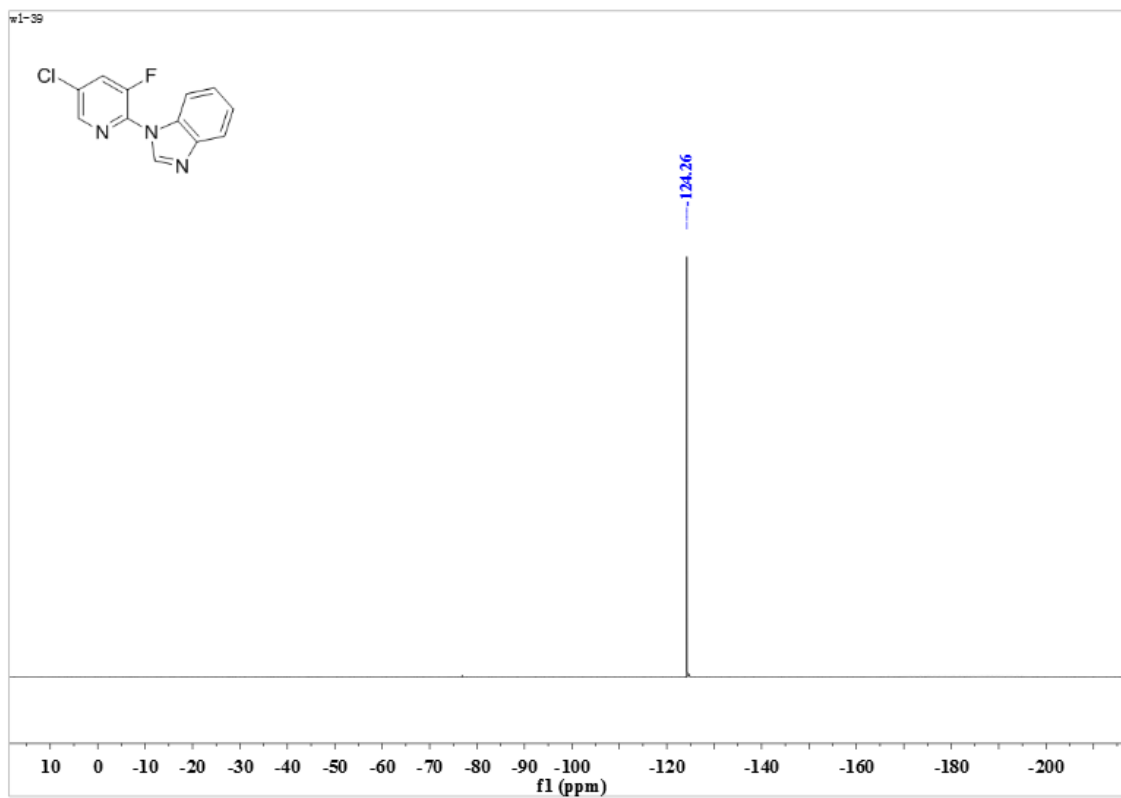

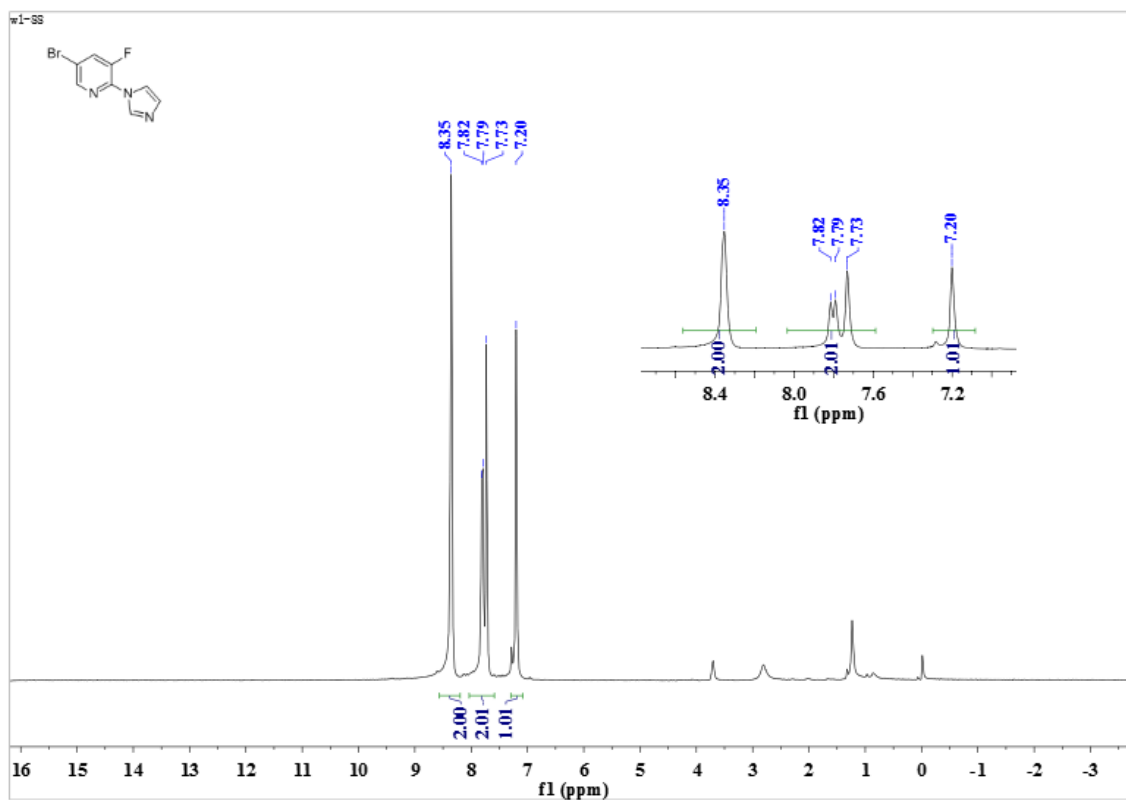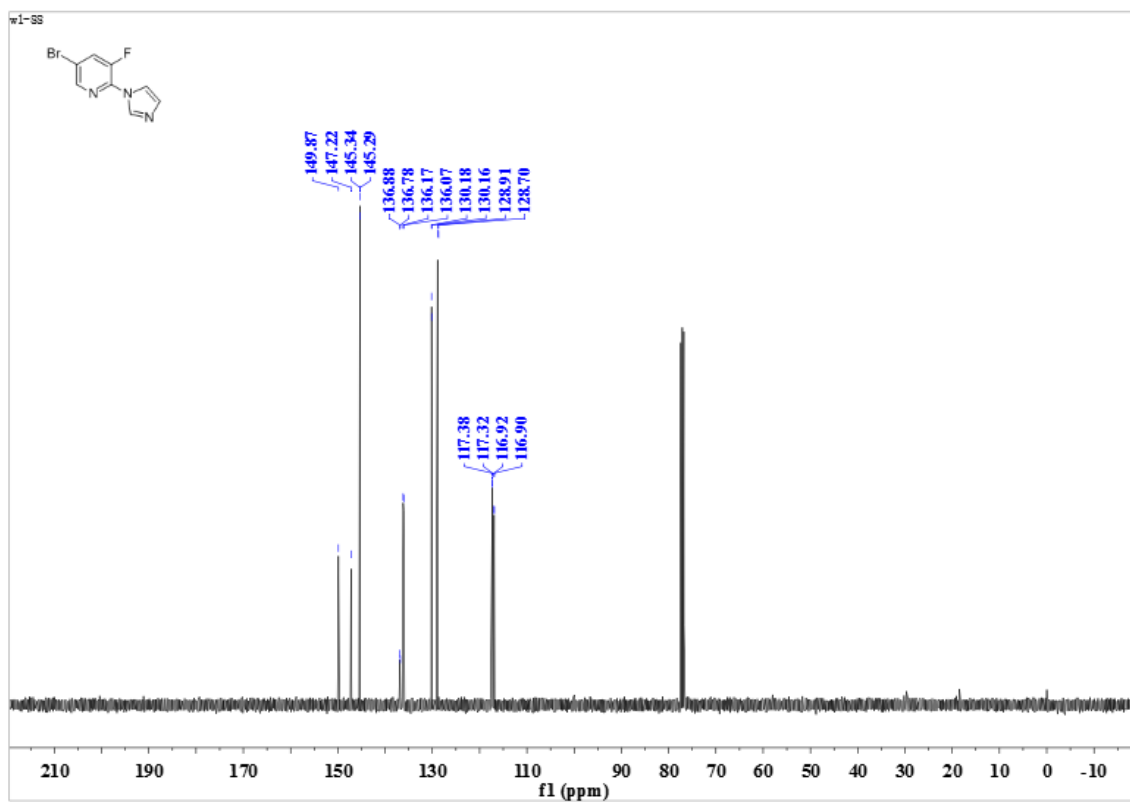

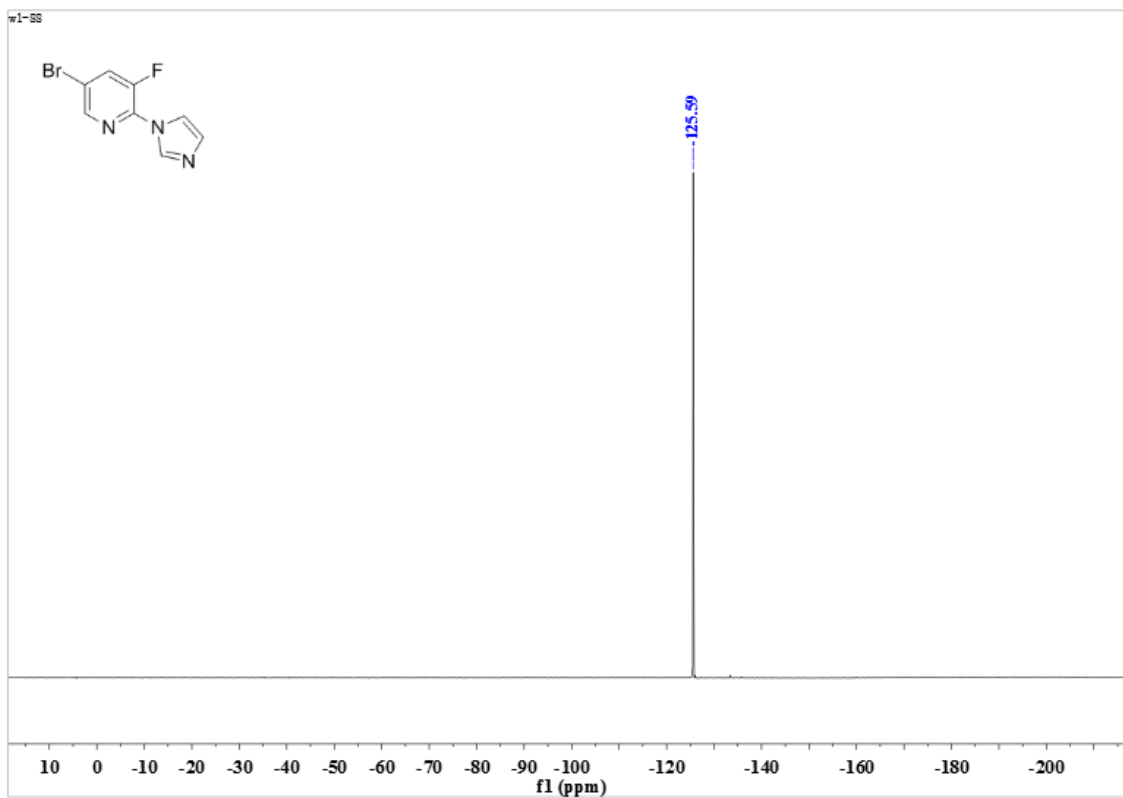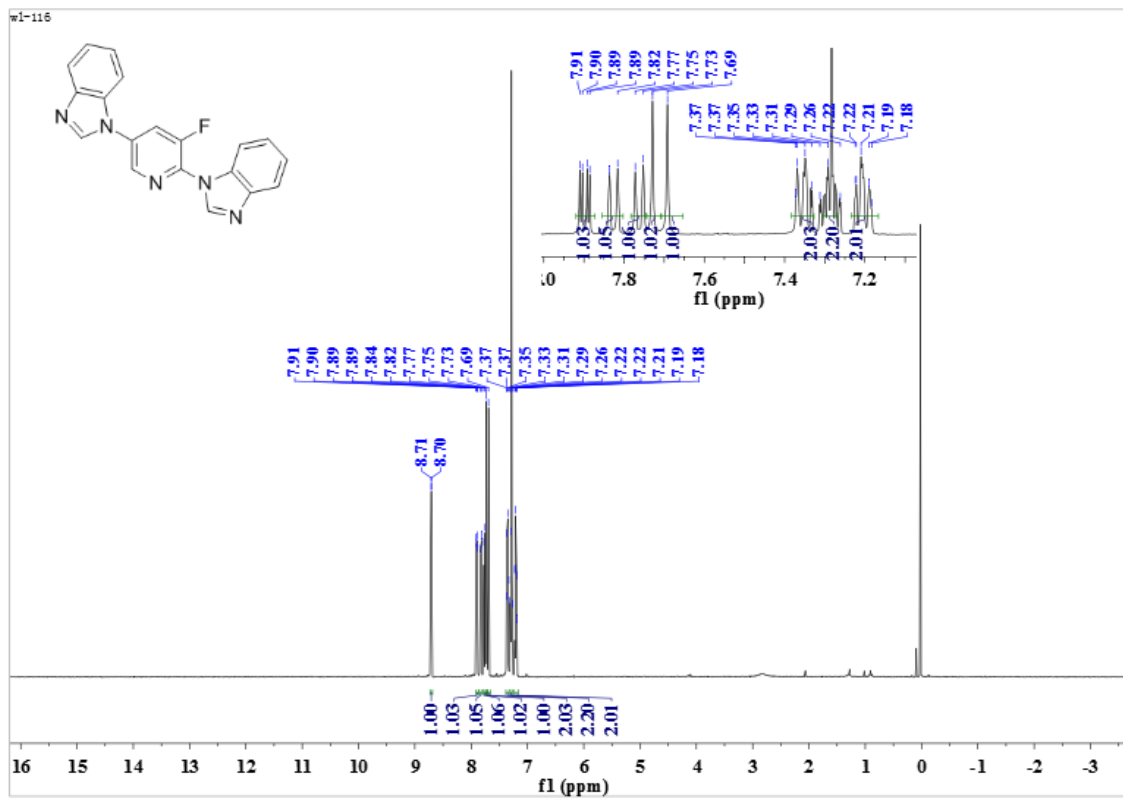

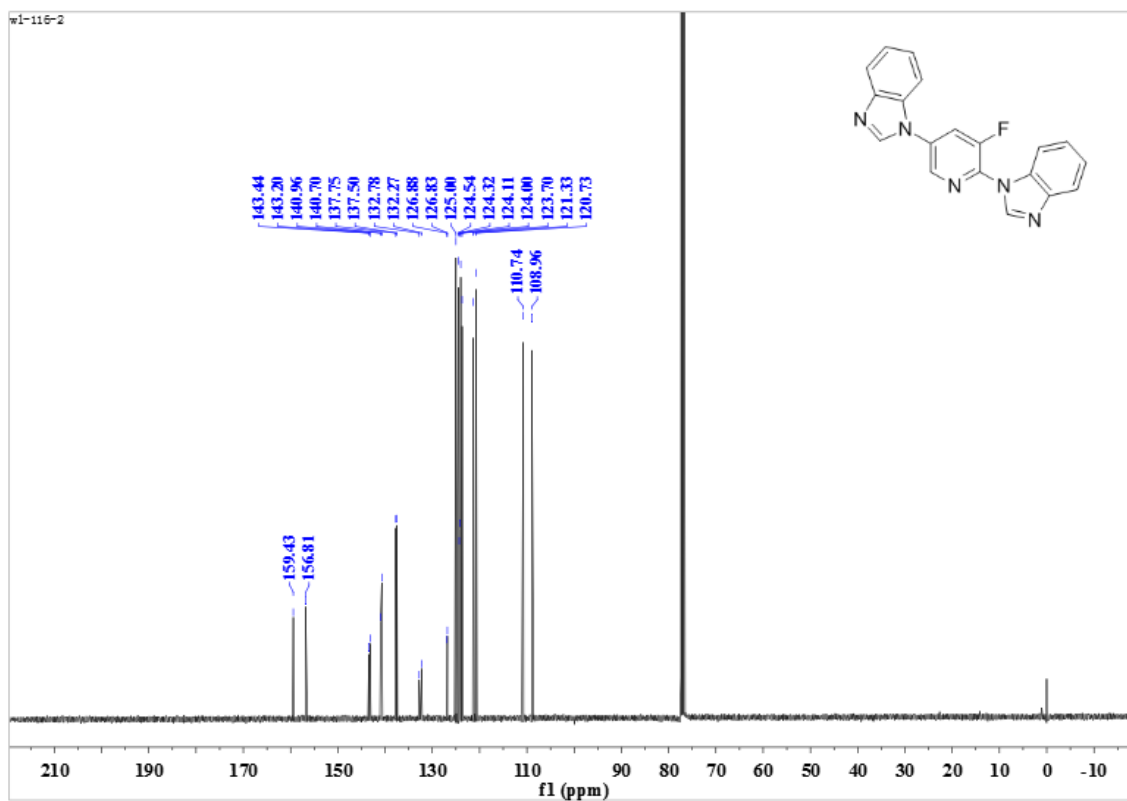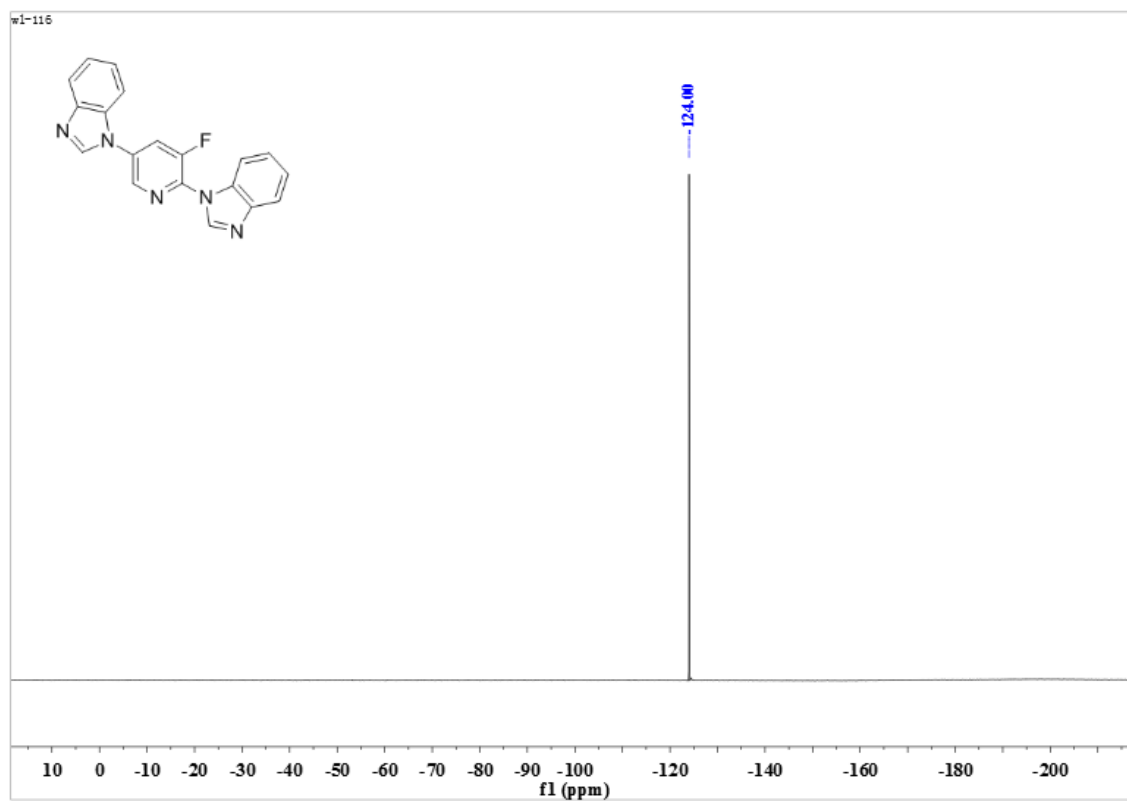



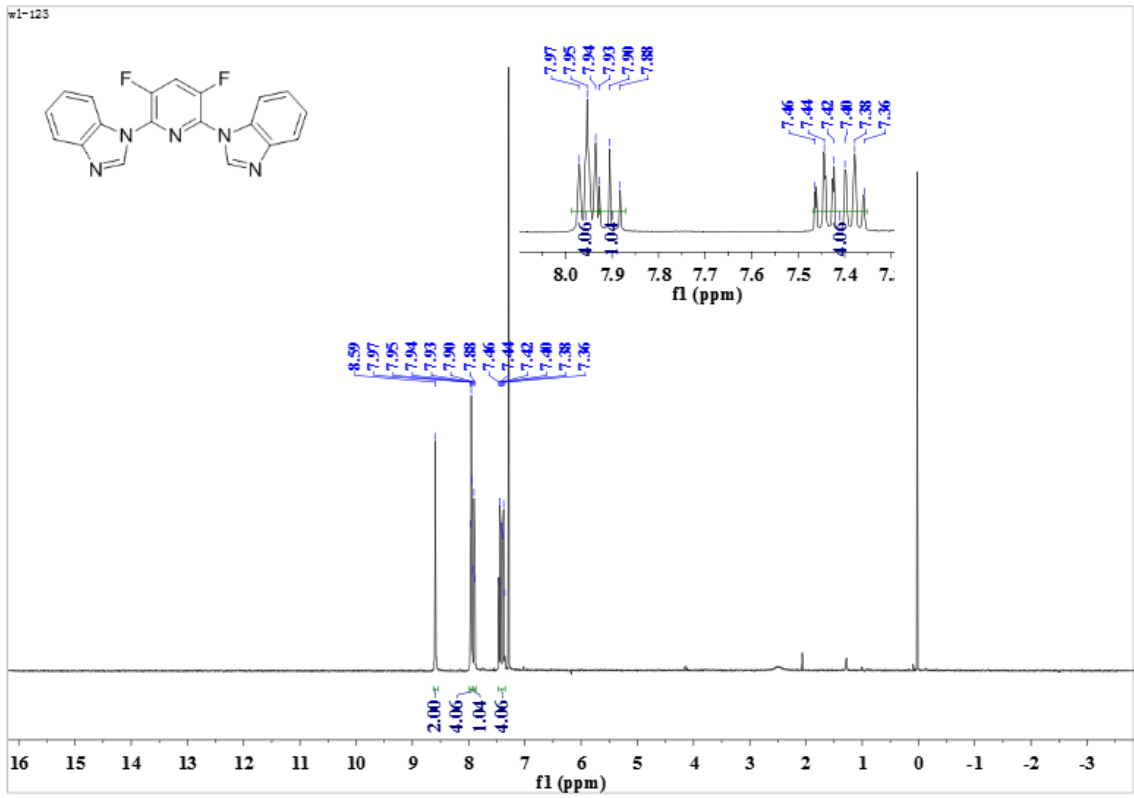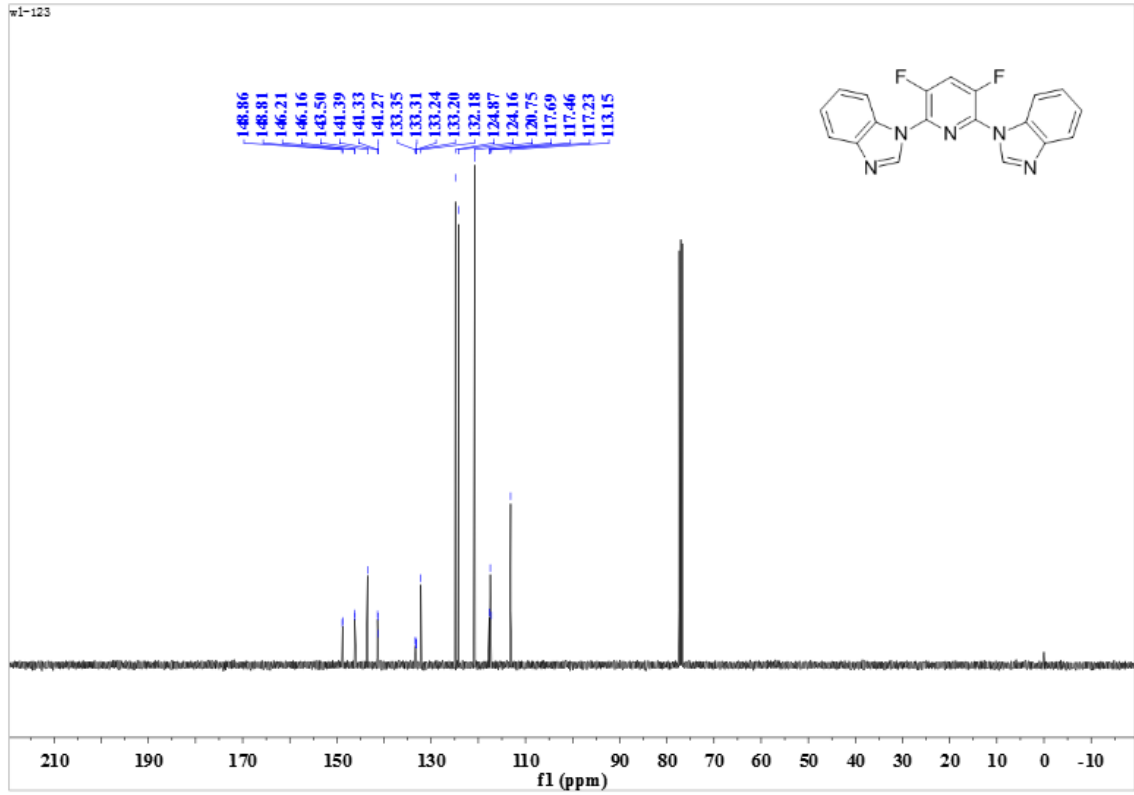

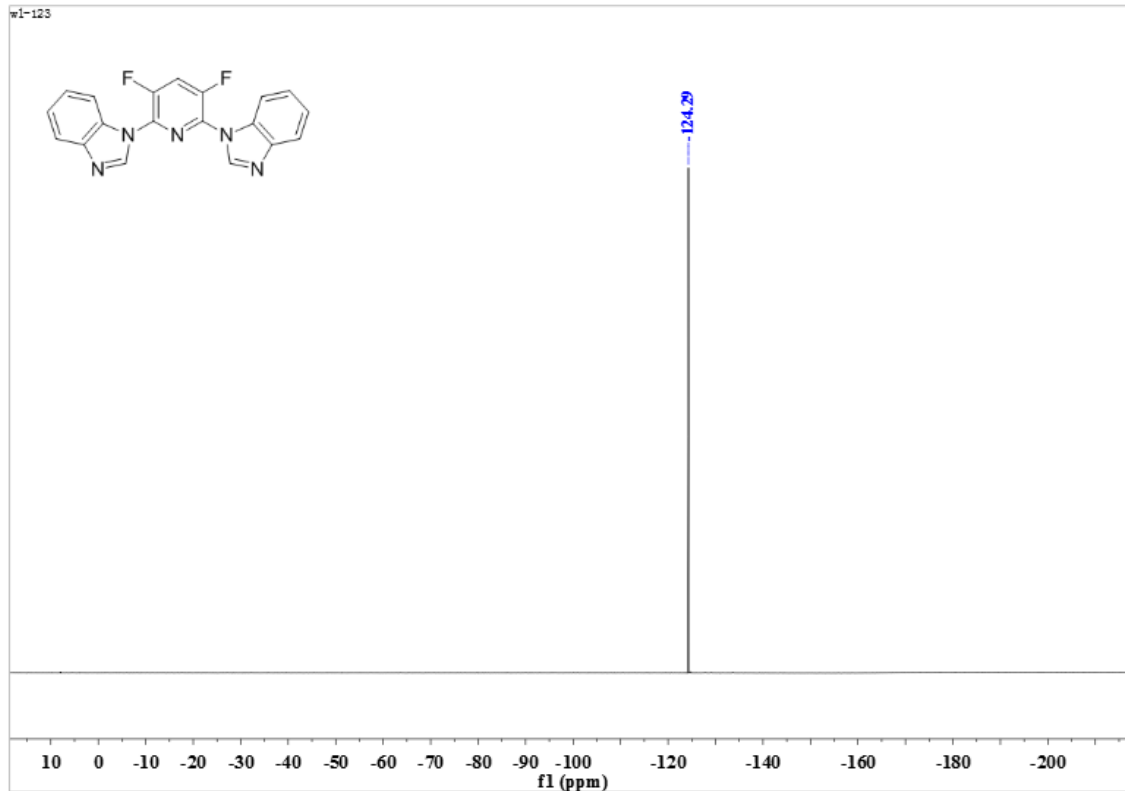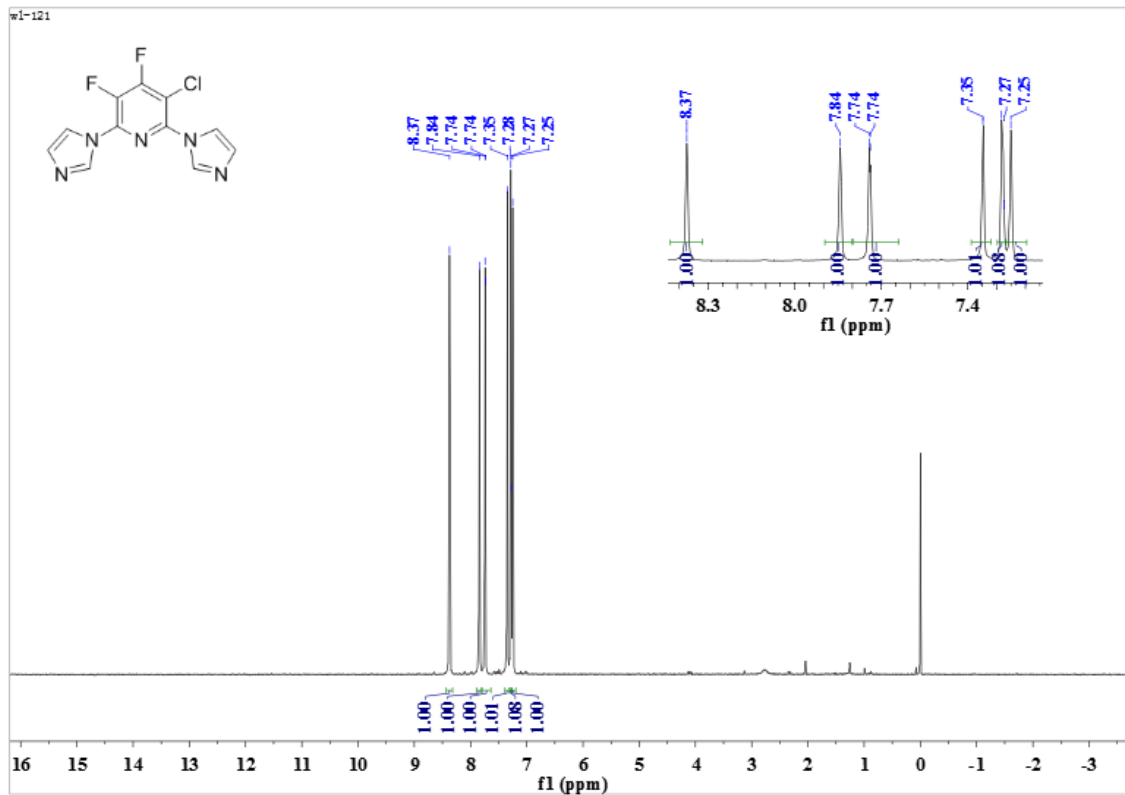

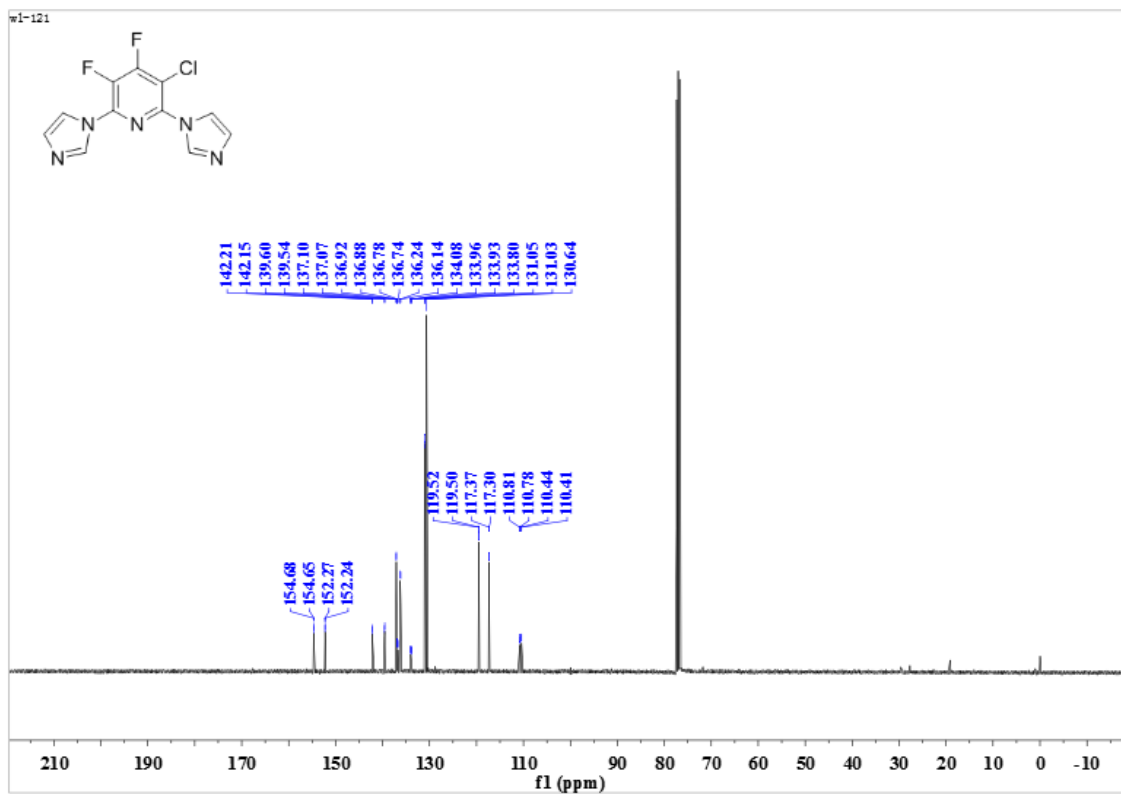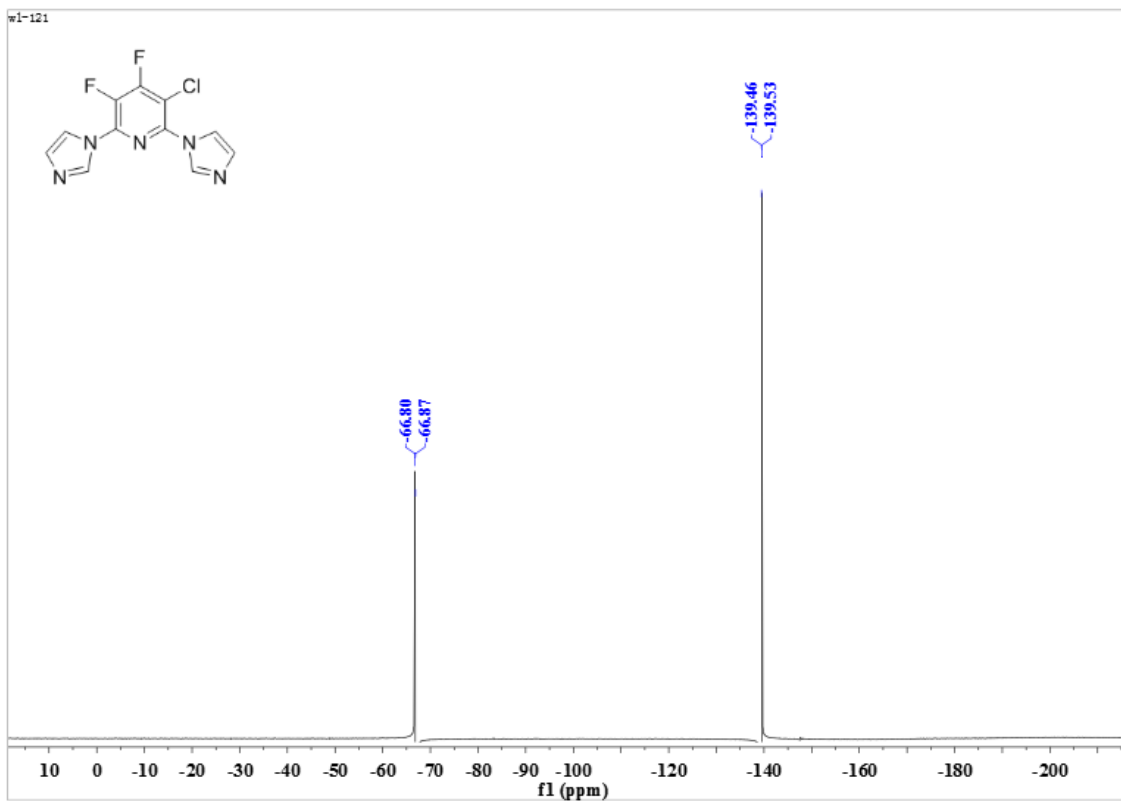

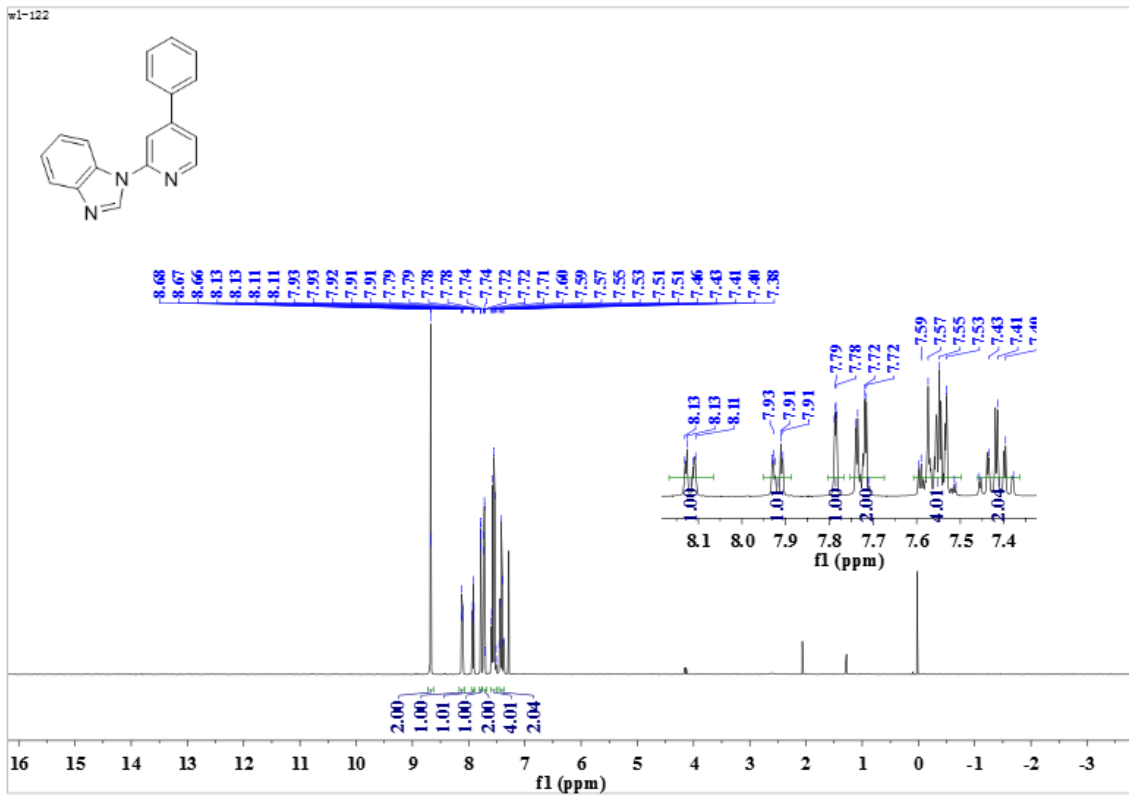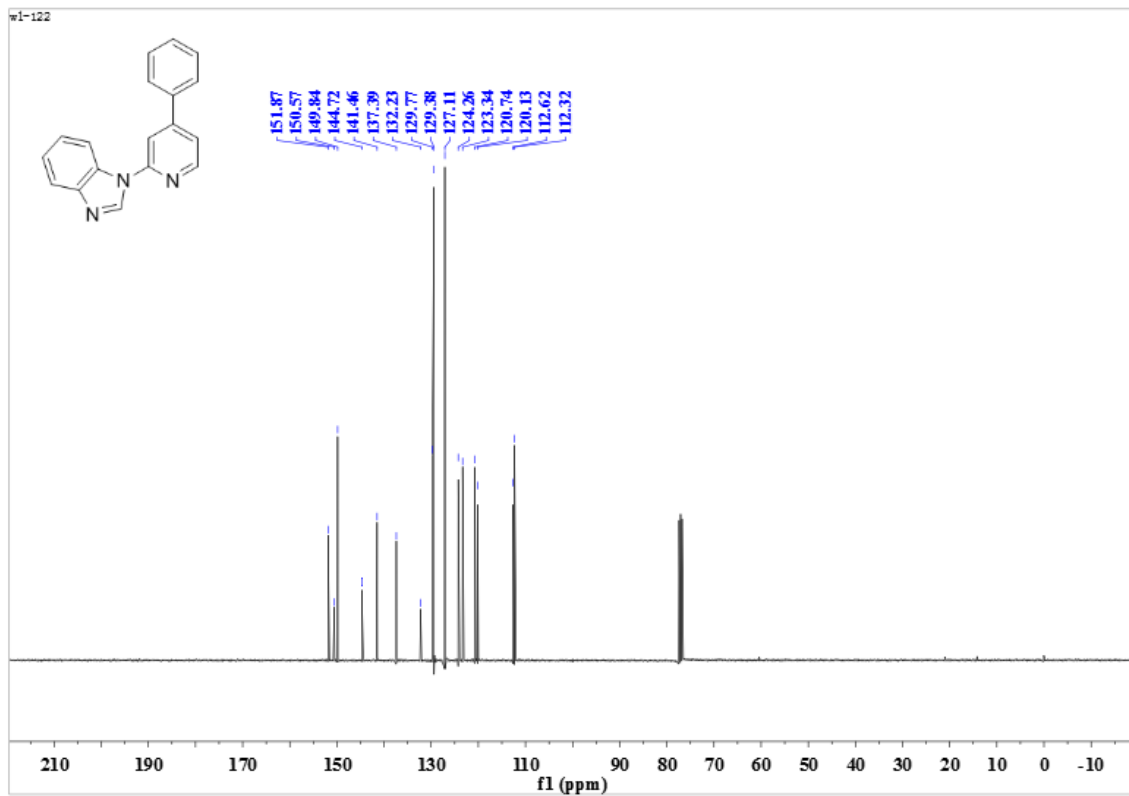

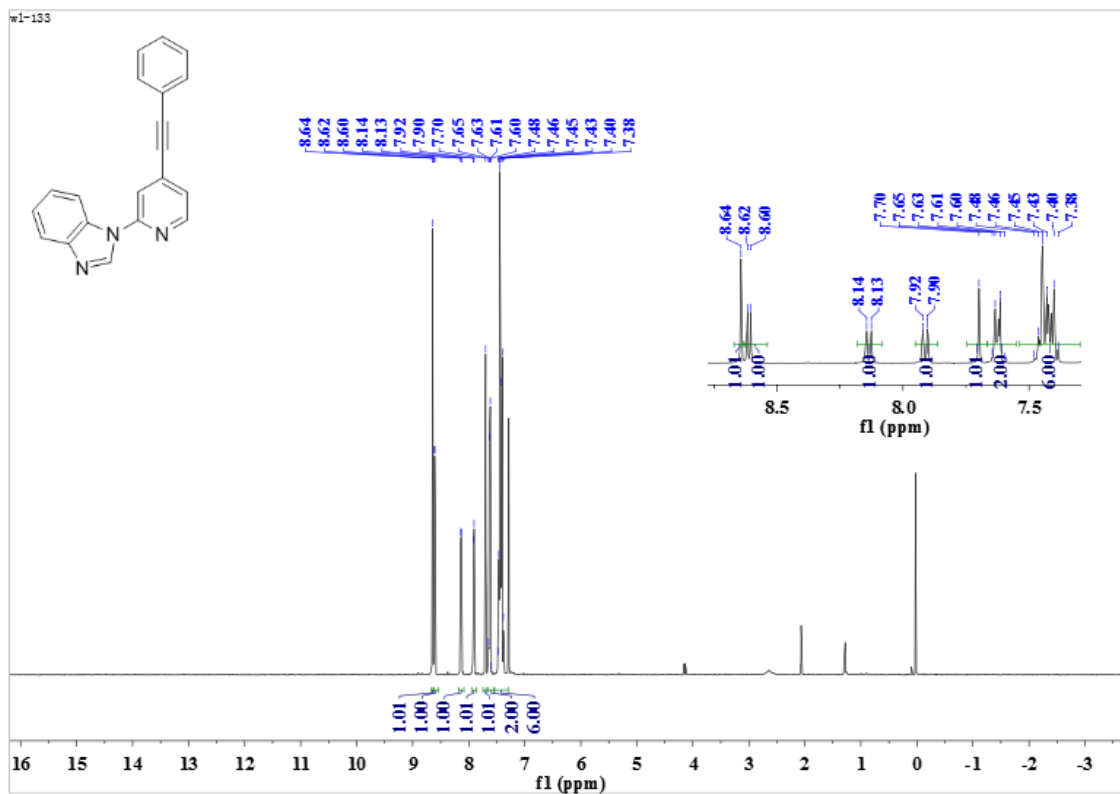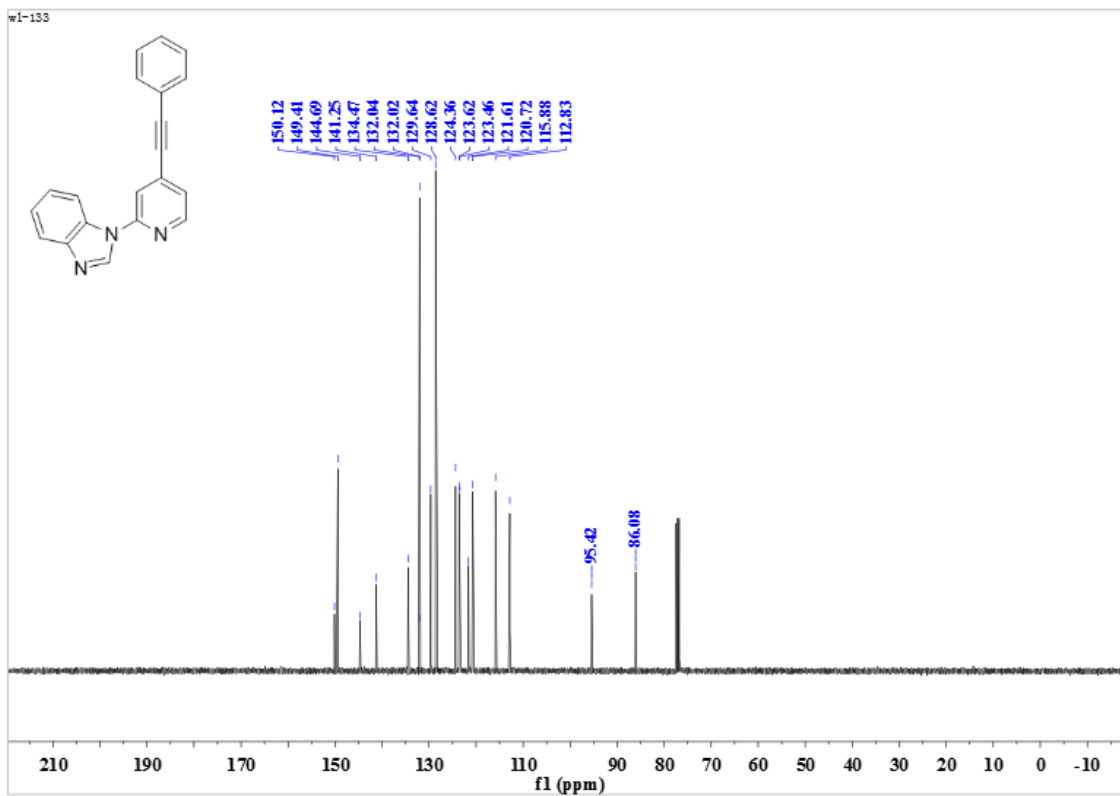

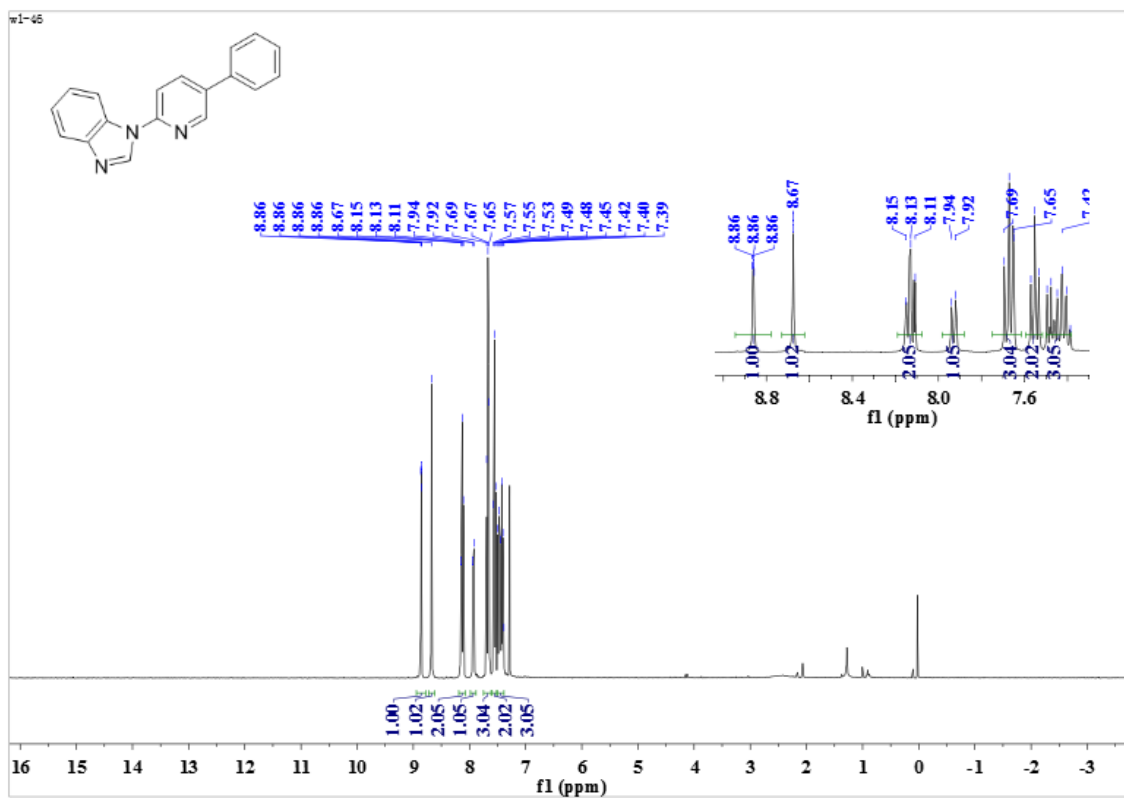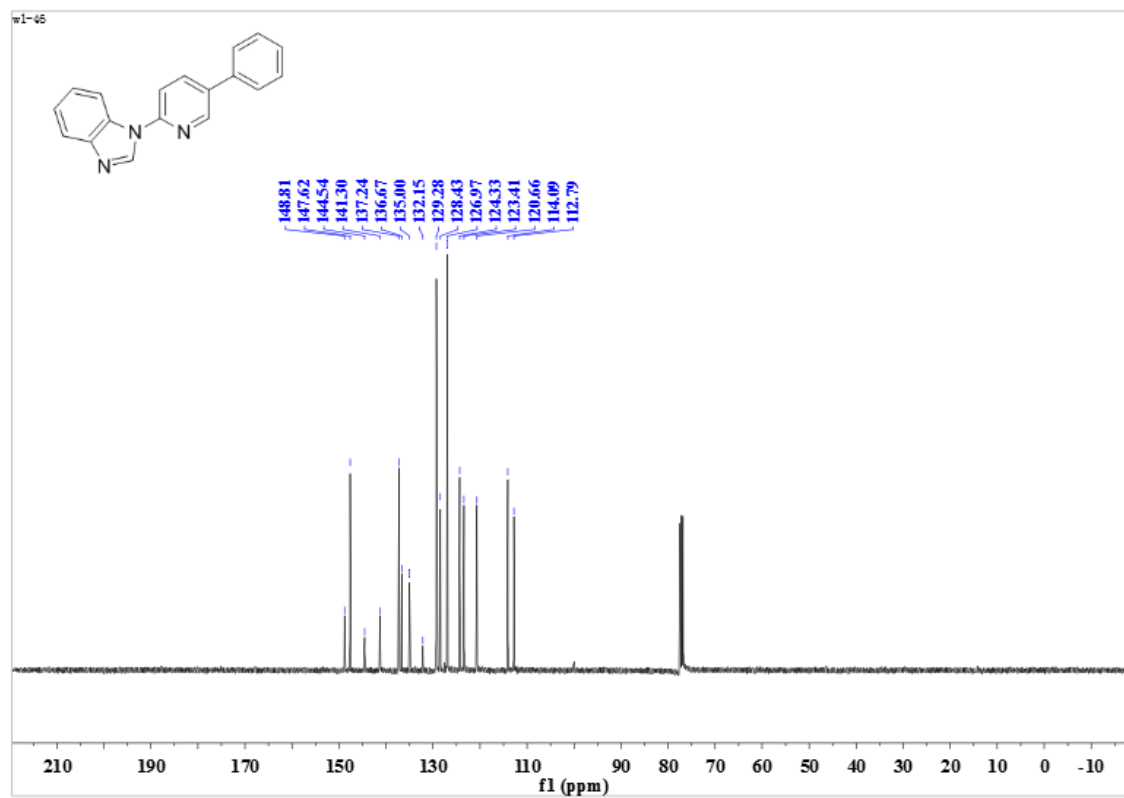

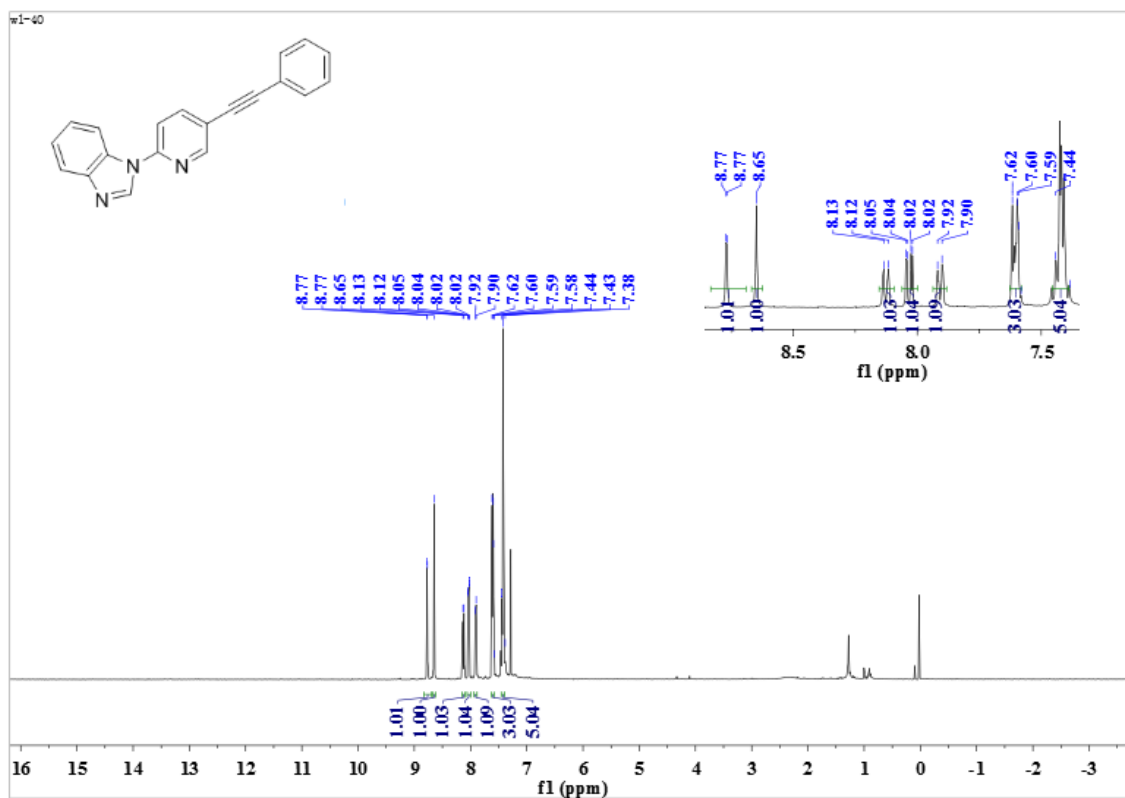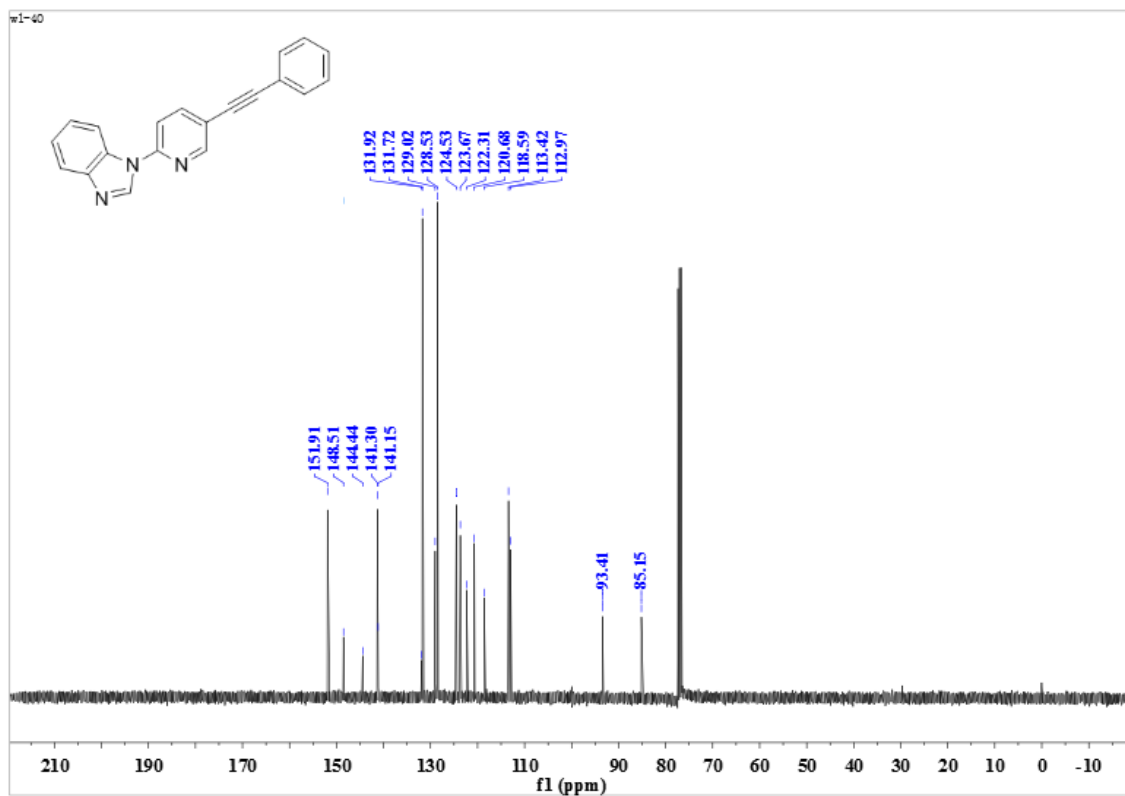

Supplement: c5ra18653f1.pdf [file c5ra18653f1.pdf]
